# Supplementary material for: An enantioselective organocatalytic intramolecular Morita–Baylis–Hillman (IMBH) reaction of dienones, and elaboration of the IMBH adducts to fluorenones
Source: Royal Society of Chemistry journal article supplement (doi:10.1039/c7cc02524f), 2017-01-01
Supplement: c7cc02524f1.pdf [file c7cc02524f1.pdf]

## Supporting Information

### Enantioselective organocatalytic intramolecular Morita-Baylis-Hillman (IMBH) reaction of dienones, and elaboration of the IMBH adducts to fluorenones

Bishnupada Satpathi, Siddhant V. Wagulde, and S. S. V. Ramasastry\*

*Organic Synthesis and Catalysis Lab, Department of Chemical Sciences, Indian Institute of Science Education and Research (IISER) Mohali, Sector 81, S A S Nagar, Manauli PO, Punjab 140 306, INDIA*

*E-mail: ramsastry@iisermohali.ac.in*

| S. No | Contents                                                                                                 | Page no |
|-------|----------------------------------------------------------------------------------------------------------|---------|
| 1     | General experimental methods                                                                             | 2       |
| 2     | General procedure-1: Synthesis of the dienones <b>1q</b> and <b>1r</b>                                   | 3       |
| 3     | General procedure-2: Synthesis of the dienones <b>1a-1p</b> , <b>1s</b> and <b>1t</b>                    | 4       |
| 4     | General procedure-3: Screening of reaction parameters                                                    | 6       |
| 5     | General procedure-4: Evaluating the substrate scope (Table 1)                                            | 6       |
| 6     | General Procedure-5: Substrate scope with chiral catalyst (Table 2)                                      | 7       |
| 7     | General Procedure-6: Synthesis of 3-substituted-4-acetylated-9-fluorenones <b>13</b>                     | 7       |
| 8     | Spectroscopic data of all new compounds reported in this study                                           | 8       |
| 9     | Crystal structure of racemic <b>2a</b> (CCDC 1520613)                                                    | 30      |
| 10    | Crystal structure of chiral <b>2j</b> (CCDC 1520308)                                                     | 34      |
| 11    | Efforts to gain evidence for 1,4- vs 1,6-addition of phosphines                                          | 39      |
| 12    | Copies of <sup>1</sup> H and <sup>13</sup> C-NMR spectra of all the new compounds reported in this study | 54      |
| 13    | HPLC spectra                                                                                             | 106     |

**General experimental methods:** All the starting compounds and catalysts employed in this study were procured from Sigma-Aldrich and were used without further purification. For thin layer chromatography (TLC), silica aluminium foils with fluorescent indicator 254 nm (from Aldrich) were used and compounds were visualised by irradiation with UV light and/or by treatment with a solution of *p*-anisaldehyde (23 mL), conc. H<sub>2</sub>SO<sub>4</sub> (35 mL), and acetic acid (10 mL) in ethanol (900 mL) followed by heating. Column chromatography was performed using SD Fine silica gel 100-200 mesh (approximately 15–20 g per 1 g of the crude product). Dry THF was obtained by distillation over sodium and stored over sodium wire. IR spectra were recorded on a Perkin–Elmer FT IR spectrometer as thin films or KBr pellet, as indicated, with  $\nu_{\max}$  in inverse centimetres. Melting points were recorded on a digital melting point apparatus Stuart SMP30 and were uncorrected. <sup>1</sup>H NMR and <sup>13</sup>C NMR spectra were recorded on a 400 MHz Bruker Biospin Avance III FT-NMR spectrometer. NMR shifts are reported as delta ( $\delta$ ) units in parts per million (ppm) and coupling constants (*J*) are reported in Hertz (Hz). The following abbreviations are utilised to describe peak patterns when appropriate: br=broad, s=singlet, d=doublet, t=triplet, q=quartet and m=multiplet. Proton chemical shifts are given in  $\delta$  relative to tetramethylsilane ( $\delta$  0.00 ppm) in CDCl<sub>3</sub> or in (CD<sub>3</sub>)<sub>2</sub>SO ( $\delta$  2.50 ppm). Carbon chemical shifts are internally referenced to the deuterated solvent signals in CDCl<sub>3</sub> ( $\delta$  77.1 ppm) or in (CD<sub>3</sub>)<sub>2</sub>SO ( $\delta$  39.5 ppm). Single crystal X-ray analysis was carried on a Bruker AXS KAPPA APEX II system or Rigaku XtaLAB mini X-ray diffractometer. High-resolution mass spectra were recorded on a Waters QTOF mass spectrometer. Optical rotations were recorded on Rudolph APIII/2W instrument. HPLC data was acquired from a Waters machine (model no 515).

### General procedure-1: Synthesis of the dienones **1q** and **1r**.

The dienones **1q** and **1r** were synthesised as in the literature methods.<sup>1</sup> Directed  $\alpha$ -alkylation of benzothiophene-3-carboxaldehydes **A** afforded the dienols **B** which upon IBX oxidation generated the dienones, Scheme 1S.

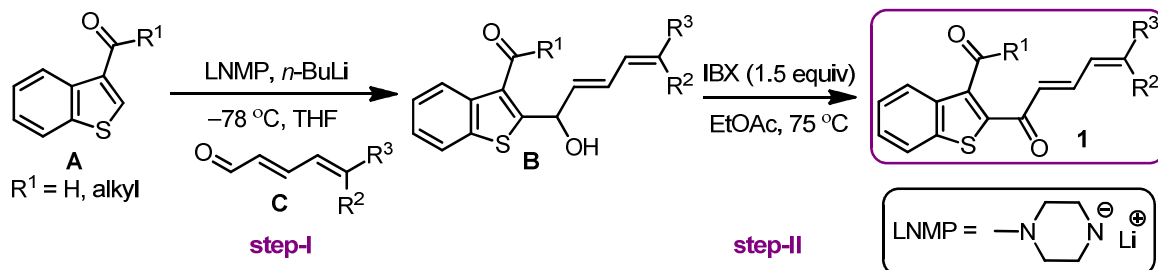

**Scheme 1S.** Synthesis of the dienones **1q** and **1r**.

**Representative procedure for step-I (Scheme 1S):** To a solution of *N*-methylpiperazine (NMP, 0.18 mL, 1.6 mmol) in THF (5 mL) at  $-78\text{ }^\circ\text{C}$  was added  $n\text{-BuLi}$  (1.6 *M* in hexane, 1.0 mL, 1.6 mmol). After 15 min, benzothiophene-3-carboxaldehyde (200 mg, 1.2 mmol) was added and then the reaction mixture was stirred for an additional 30 min. A hexane solution of  $n\text{-BuLi}$  (2.0 mL, 3.2 mmol) was added and the mixture was stirred for an additional 15 min and then the mixture was warmed to  $-30\text{ }^\circ\text{C}$  in 2 h. The solution was again cooled to  $-78\text{ }^\circ\text{C}$  and a dienal **C** (1.5 mmol) was added drop wise over 5 min. The mixture was warmed to room temperature over 30 min. The reaction progress was monitored by TLC. Reaction mixture was quenched with saturated aqueous ammonium chloride solution and extracted with ethyl acetate. The organic extracts were combined, dried over anhydrous sodium sulphate and concentrated. The crude product was purified by silica gel column chromatography using hexane/ethyl acetate as eluent to afford dienol **B**.

**Representative procedure for step-II (Scheme 1S):** Alcohol **B** (1 mmol) was dissolved in ethyl acetate (10 mL), and IBX (1.5 mmol) was added. The resulting suspension was immersed in an oil bath set to  $75\text{ }^\circ\text{C}$  and stirred until alcohol **B** disappeared as monitored by TLC. The reaction was cooled to room temperature and filtered through Buchner funnel. The filter cake was washed with  $3 \times 2\text{ mL}$  of ethyl acetate. Organic extracts were combined and worked up using saturated sodium bicarbonate solution to remove excess iodobenzoic acid. The extract was dried over anhydrous sodium sulphate and concentrated under vacuum. The

<sup>1</sup> (a) S. Dhiman and S. S. V. Ramasastry, *Ind. J. Chem., Sect. A*, 2013, **52**, 1103; (b) R. P. Shirke and S. S. V. Ramasastry, *J. Org. Chem.*, 2015, **80**, 4893.

crude product was purified by silica gel column chromatography using hexane/ethyl acetate as eluent to afford the dienone **1**.

### General procedure-2: Synthesis of the dienones **1a-1p**, **1s** and **1t**.

All these dienones were prepared as in Scheme 2S and 3S. For example, commercially available 2-bromobenzaldehydes **C** (when  $R^1 = H$  and  $X = CH$ ) were converted to 2-bromobenzyl alcohols **E** via a straightforward sodium borohydride reduction. *n*-Butyllithium mediated metal-halogen exchange followed by alkylation with an appropriate dienal **C** generated the diols **F**. IBX oxidation of the diols **F** led to the formation of the dienone-aldehydes **1a-1m** and **1p**, Scheme 2S. Similarly, **1n** and **1o** were prepared as in Scheme 3S, and the dienones **1s** and **1t** were prepared as described in Scheme 4S.

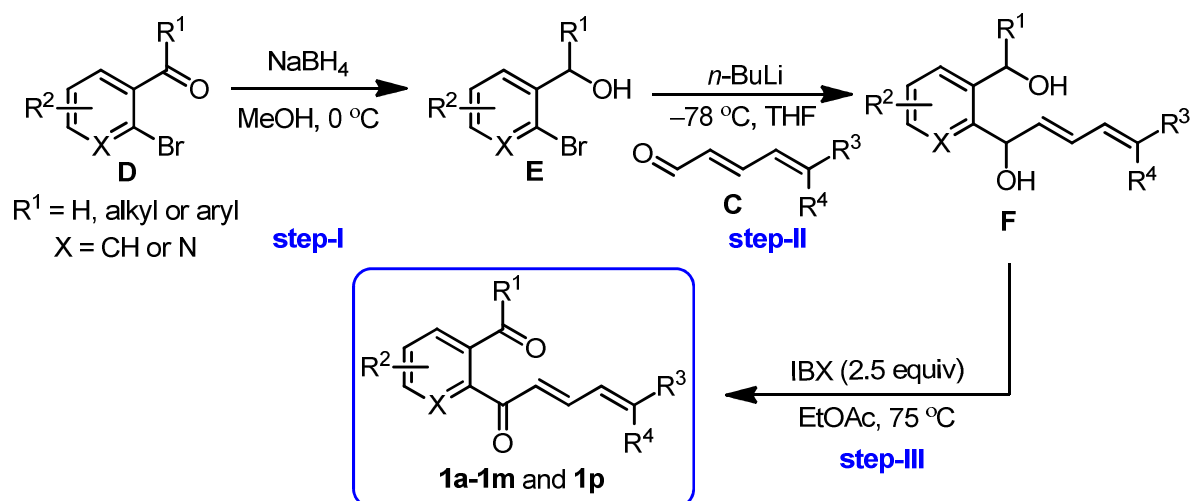

Scheme 2S. Synthesis of the dienones **1a-1m** and **1p**.

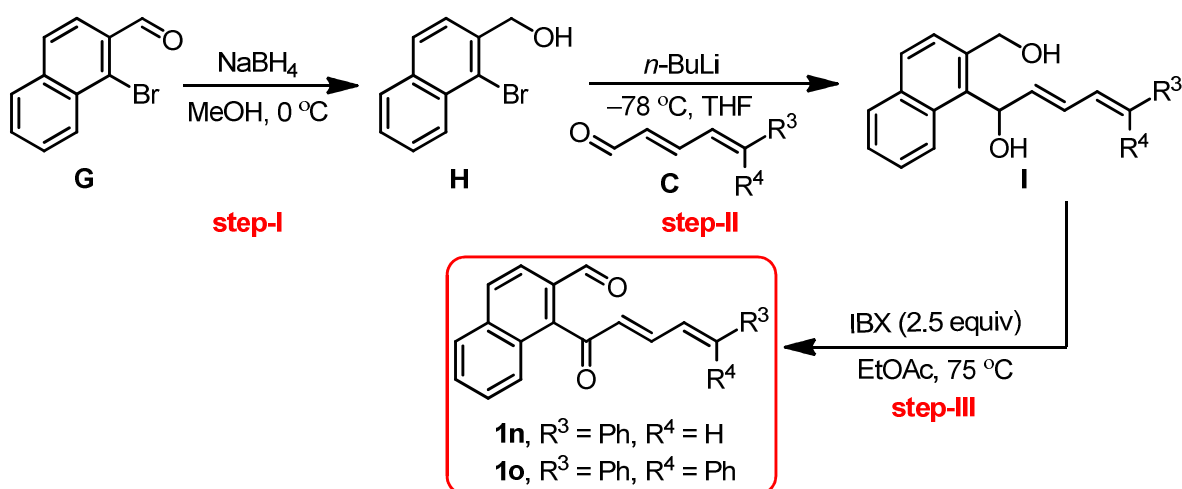

Scheme 3S. Synthesis of the dienones **1n** and **1o**.

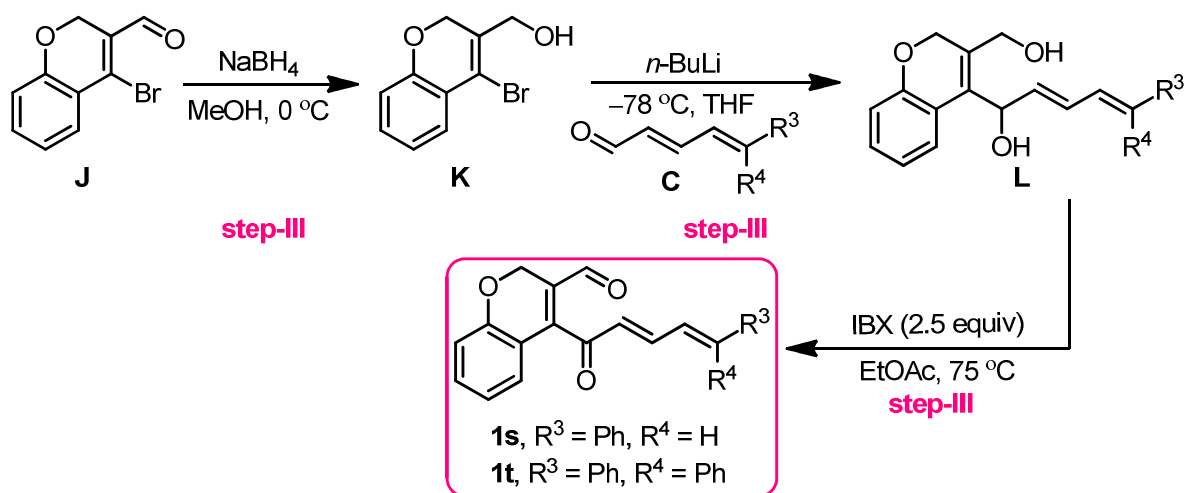

**Scheme 4S.** Synthesis of the dienones **1s** and **1t**.

**Representative procedure for step-I (Scheme 2S):** An oven dried 25 mL RB flask was charged with 2-bromo benzaldehyde **D** (2.0 mmol), 10 mL dry MeOH and placed at 0 °C. Sodium borohydride (2.1 mmol) was added portion wise under nitrogen atmosphere and stirred at room temperature until **D** disappeared (monitored by TLC) and quenched by saturated aqueous ammonium chloride. Methanol was removed under vacuum and extracted using ethyl acetate. Organic extracts were combined, dried over anhydrous sodium sulphate. Solvent was distilled off under reduced pressure to afford crude bromoalcohol **E** and proceeded to the next step without further purification.

**Representative procedure for step-II (Scheme 2S):**<sup>2</sup> An oven dried 25 mL long neck RB flask was charged with bromoalcohol **E** (1.0 mmol), 5 mL dry THF and placed at -78 °C. *n*-BuLi (1.6 M in hexanes, 2.2 mmol) was added drop wise at same temperature and stirred for 2 hours. A dienal **C** (1.3 mmol) dissolved in 1 mL of dry THF, was added dropwise over 2 mins and stirred at room temperature for 30 mins. The reaction mixture was quenched with saturated aq. ammonium chloride solution and extracted using ethyl acetate. The organic extracts were combined, dried over anhydrous sodium sulphate and concentrated. The crude product was purified by silica gel column chromatography using hexanes/ethyl acetate as eluent to afford the diol **F**.

**Representative procedure for step-III (Scheme 2S):** The diol **F** were oxidised using IBX following the general procedure described for step II in Scheme 1S to afford dienones **1a-1p**, **1s** and **1t**.

<sup>2</sup> S. R. Flanagan, D. C. Harrowven and M. Bradely, *Tetrahedron*, 2002, **58**, 5989.

### General procedure-3: Screening of reaction parameters

An oven dried 5 mL glass vial was charged with **1a** (30 mg, 0.15 mmol). An appropriate solvent (1 mL) and a catalyst (0.015 mmol) were introduced at room temperature under nitrogen atmosphere and stirring continued at appropriate temperature until **1a** disappeared as monitored by TLC. All the volatiles were removed under reduced pressure. The crude product was directly purified by silica gel flash chromatography using hexane/ethyl acetate as eluent, to afford **2a** as a pale yellow solid.

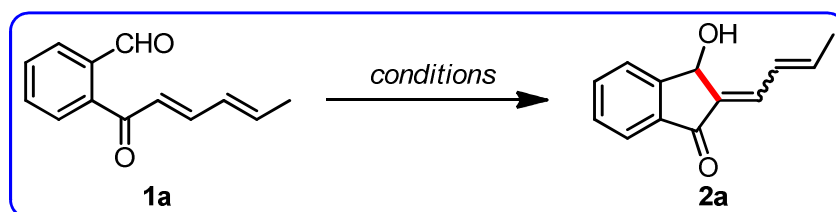

| S.No            | catalyst (10 mol%)     | solvent        | temp (°C) | time          | % yield/(E/Z)   |
|-----------------|------------------------|----------------|-----------|---------------|-----------------|
| 1               | PPh <sub>3</sub>       | Toluene        | 50        | 48 h          | no reaction     |
| 2               | PCy <sub>3</sub>       | Toluene        | rt        | 1 h           | 91 (4/1)        |
| 3               | PCy <sub>3</sub>       | DCE            | rt        | 1 h           | 90 (4/1)        |
| <b>4</b>        | <b>PMe<sub>3</sub></b> | <b>Toluene</b> | <b>rt</b> | <b>15 min</b> | <b>95 (3/1)</b> |
| 5               | PMe <sub>3</sub>       | DCM            | rt        | 15 min        | 92 (3/1)        |
| 6 <sup>a</sup>  | DBU                    | DCM            | rt        | 24 h          | 86 (5/1)        |
| 7 <sup>a</sup>  | DABCO                  | DCM            | 45        | 24 h          | 81 (3/1)        |
| 8               | PPh <sub>2</sub> Et    | Toluene        | rt        | 30 min        | 89 (4/1)        |
| 9               | PPh <sub>2</sub> Et    | DCM            | rt        | 30 min        | 88 (4/1)        |
| 10 <sup>a</sup> | DMAP                   | Toluene        | rt        | 24 h          | 85 (3/1)        |

<sup>a</sup>Yields are based on starting material recovery

### General procedure-4: Evaluating the substrate scope (Table 1).

An oven dried 5 mL glass vial was charged with **1** (30 mg, 0.15 mmol). Toluene (1 mL) and PMe<sub>3</sub> (1 M solution in toluene, 0.1 mL, 0.015 mmol) were introduced at room temperature (rt) under nitrogen atmosphere and stirring continued at rt until **1** disappeared as monitored by TLC. All the volatiles were removed under reduced pressure. The crude product was purified by silica gel flash chromatography using hexane/ethyl acetate as eluent, to afford **2**.

### General Procedure-5: Substrate scope with chiral catalyst (Table 2).

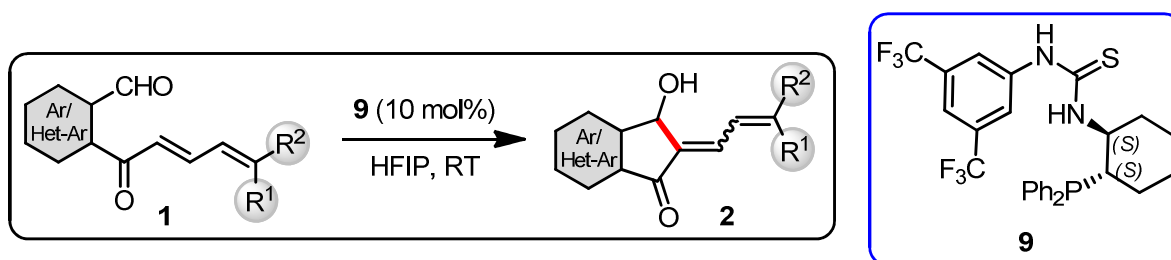

An oven dried 5 mL glass vial was charged with **1** (20 mg, 0.1 mmol) in 1,1,1,3,3,3-hexafluoroisopropanol (HFIP, 0.5 mL), catalyst **9** was introduced at room temperature (rt) under nitrogen atmosphere and stirring continued at rt until **1** disappeared as monitored by TLC. Volatiles were removed under reduced pressure. The crude product was purified by silica gel flash chromatography using hexane/ethyl acetate as eluent, to afford **2**.

### General Procedure-6: Synthesis of 3-substituted-4-acetylated-9-fluorenone **13**.

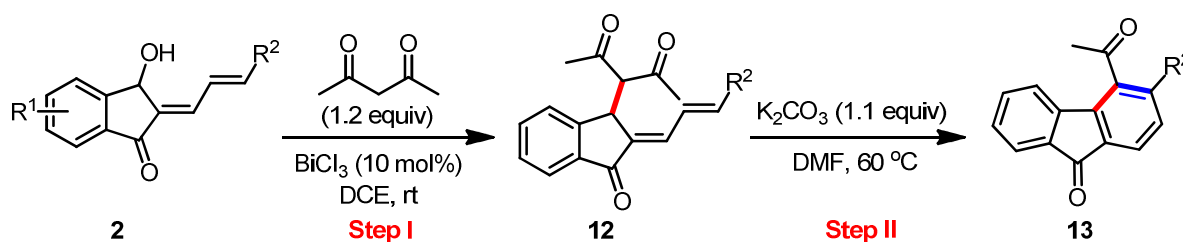

**Scheme 5S:** Synthesis of fluorenone (**13**).

**Representative procedure for step-I (Scheme 5S):**<sup>1</sup> An oven dried 5 mL glass vial was charged with **2** (30 mg, 0.15 mmol) and acetylacetone (20 mg, 0.2 mmol) in dichloroethane (DCE, 1 mL) and bismuth(III)chloride (10 mol %) was introduced at room temperature (rt). Stirring continued at RT until **2** disappeared as monitored by TLC. Reaction mixture was quenched with water and extracted using dichloromethane. Volatiles were removed under reduced pressure. The crude product **12** was subjected to next step without further purification.

**Representative procedure for step-II (Scheme 5S):** An oven dried 5 mL glass vial was charged with **12** (0.1 mmol) in dimethylformamide (DMF, 1 mL) and potassium carbonate (0.11 mmol) was introduced at room temperature (rt) and stirring continued at 60 °C until **12** disappeared as monitored by TLC. The crude reaction mixture was purified by silica gel flash chromatography using hexanes/ethyl acetate as eluent, to afford **13**.

## Spectroscopic data of the newly synthesised compounds during the present study

### 2-((2*E*,4*E*)-Hexa-2,4-dienoyl)benzaldehyde (**1a**).

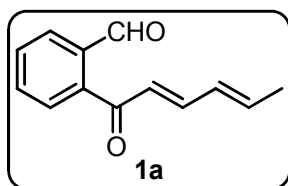

This compound was prepared by following the general procedure-2 and isolated as pale yellow oil.  $R_f = 0.4$  (Hexane/EtOAc = 4/1). **IR (thin film, neat):**  $\nu_{\max}/\text{cm}^{-1}$  3447, 2910, 1701, 1663, 1586, 1199, 1002, 770.  **$^1\text{H}$  NMR (400 MHz,  $\text{CDCl}_3$ ):**  $\delta$  10.12 (s, 1H), 7.97-7.95 (m, 1H), 7.68-7.56 (m, 3H), 7.06 (dd,  $J = 15.3$  and 10.8 Hz, 1H), 6.56 (d,  $J = 15.3$  Hz, 1H), 6.31-6.18 (m, 2H), 1.88 (d,  $J = 6.4$  Hz, 3H).  **$^{13}\text{C}$  NMR (100 MHz,  $\text{CDCl}_3$ ):**  $\delta$  194.6, 191.2, 147.6, 142.6, 142.0, 135.4, 133.2, 130.7, 130.2, 129.2, 128.3, 127.3, 19.0. **HRMS (ESI):**  $m/z$  calcd for  $\text{C}_{13}\text{H}_{13}\text{O}_2$  (M+H): 201.0916. Found: 201.0905.

### (*E*)-2-((*E*)-But-2-en-1-ylidene)-3-hydroxy-2,3-dihydro-1*H*-inden-1-one (**2a**).

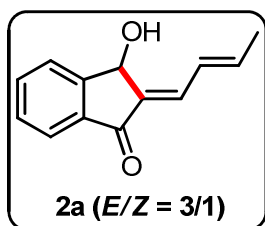

This compound was isolated as pale yellow solid. Following the general procedure-3, 30 mg of **1a** afforded 28.5 mg of **2a** (95% yield). M.P = 117-119 °C.  $R_f = 0.2$  (Hexane/EtOAc = 5/1). **IR (thin film, neat):**  $\nu_{\max}/\text{cm}^{-1}$  3382, 2910, 1687, 1632, 1030, 922, 754.  **$^1\text{H}$  NMR (400 MHz,  $\text{CDCl}_3$ ):**  $\delta$  7.76 (t,  $J = 7.6$  Hz, 2H), 7.69 (dt,  $J = 7.6$  and 1.2 Hz, 1H), 7.50-7.46 (m, 1H), 7.28-7.26 (m, 1H), 6.86-6.79 (m, 1H), 6.41 (sextet, 3.2 Hz, 1H), 5.73 (d,  $J = 9.6$  Hz, 1H), 2.25 (d,  $J = 9.5$  Hz, 1H), 2.00 (dd,  $J = 7.0$  and 0.8 Hz, 3H).  **$^{13}\text{C}$  NMR (100 MHz,  $\text{CDCl}_3$ ):**  $\delta$  192.1, 151.0, 143.8, 138.0, 137.3, 136.3, 135.1, 129.6, 127.7, 125.9, 123.4, 69.0, 19.3. **HRMS (ESI):**  $m/z$  calcd for  $\text{C}_{13}\text{H}_{11}\text{O}$  (M-OH): 183.0810. Found: 183.0821.

### (*S*)-2-((*E*)-But-2-en-1-ylidene)-3-hydroxy-2,3-dihydro-1*H*-inden-1-one (**2a**).

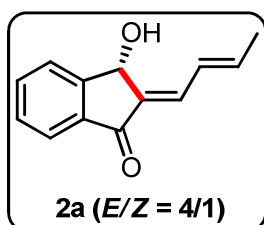

Following the general procedure-5, 25 mg of **1a** afforded 24 mg of **2a** (97% yield,  $E/Z = 4:1$ ). **Optical rotation:**  $[\alpha]_D^{23} +31.7$  ( $c$  0.20,  $\text{CHCl}_3$ ) for a sample with  $ee$  97%. The enantiomeric excess was determined by HPLC analysis using Daicel Chiralpak AS Column (92:8 *n*-Hexane/2-Propanol, 0.8 mL/min, 254 nm,  $\tau_{\text{major}} = 34.4$  min,  $\tau_{\text{minor}} = 39.7$  min).

### 2-((2*E*,4*E*)-5-Phenylpenta-2,4-dienoyl)benzaldehyde (**1b**).



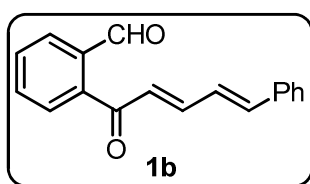

This compound was prepared by following the general procedure-2 and isolated as a pale yellow solid. M.P = 67-69 °C.  $R_f = 0.5$  (Hexane/EtOAc = 3/1). **IR (thin film, neat):**  $\nu_{\max}/\text{cm}^{-1}$  3029, 2859, 1695, 1649, 1614, 1581, 1253, 1022, 775.  **$^1\text{H}$  NMR**

(400 MHz,  $\text{CDCl}_3$ ):  $\delta$  10.18 (s, 1H), 8.02 (d,  $J = 7.2$  Hz, 1H), 7.71-7.64 (m, 3H), 7.50 (d,  $J = 7.2$  Hz, 2H), 7.41-7.35 (m, 3H), 7.31-7.25 (m, 1H), 7.01-6.99 (m, 2H), 6.80 (d,  $J = 7.3$  Hz, 1H).  **$^{13}\text{C}$  NMR (100 MHz,  $\text{CDCl}_3$ ):**  $\delta$  194.3, 191.2, 147.1, 143.0, 141.9, 135.7, 135.5, 133.2, 130.9, 129.6, 129.3, 129.1, 128.9(2C), 128.3, 127.4(2C), 126.4. **HRMS (ESI):**  $m/z$  calcd for  $\text{C}_{18}\text{H}_{15}\text{O}_2$  (M+H): 263.1072 Found: 263.1081.

**(E)-3-Hydroxy-2-((E)-3-phenylallylidene)-2,3-dihydro-1H-inden-1-one (2b).**

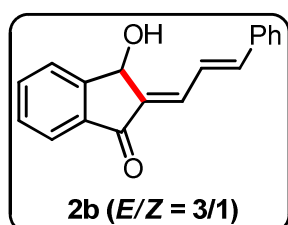

This compound was isolated as pale yellow solid. Following the general procedure-4, 50 mg of **1b** afforded 46 mg of **2b** (91% yield). M.P = 162-164 °C.  $R_f = 0.3$  (Hexane/EtOAc = 4/1). **IR (thin film, neat):**  $\nu_{\max}/\text{cm}^{-1}$  3395, 3064, 1691, 1614, 1293, 976, 765.  **$^1\text{H}$  NMR**

(400 MHz,  $\text{CDCl}_3$ ):  $\delta$  7.80-7.78 (m, 1H), 7.70-7.51 (m, 5H), 7.43-7.34 (m, 5H), 7.02 (dd,  $J = 15.2$  and  $3.2$  Hz, 1H), 5.97 (d,  $J = 4.8$  Hz, 1H), 2.86 (d,  $J = 4.9$  Hz, 1H).  **$^{13}\text{C}$  NMR (100 MHz,  $\text{CDCl}_3$ ):**  $\delta$  192.2, 151.2, 144.1, 138.3, 137.9, 137.3, 136.0, 135.2, 129.6, 129.5, 128.9(2C), 127.7(2C), 125.9, 124.0, 123.4, 69.1. **HRMS (ESI):**  $m/z$  calcd for  $\text{C}_{18}\text{H}_{13}\text{O}$  (M-OH): 245.0966. Found: 245.0970.

**2-((2E,4E)-5-(Naphthalen-2-yl)penta-2,4-dienoyl)benzaldehyde (1c).**

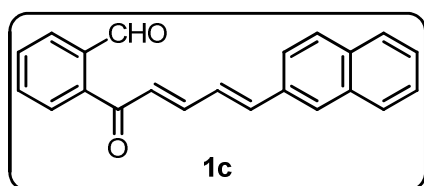

This compound was prepared by following the general procedure-2 and isolated as pale yellow solid. M.P = 107-109 °C.  $R_f = 0.4$  (Hexane/EtOAc = 3/1). **IR (thin film, neat):**  $\nu_{\max}/\text{cm}^{-1}$  3056, 1695, 1650, 1579, 1326,

1274, 1022, 748.  **$^1\text{H}$  NMR (400 MHz,  $\text{CDCl}_3$ ):**  $\delta$  10.20 (s, 1H), 8.02 (d,  $J = 7.5$  Hz, 1H), 7.85-7.83 (m, 4H), 7.72-7.65 (m, 4H), 7.53-7.50 (m, 2H), 7.36-7.33 (m, 1H), 7.13-7.12 (m, 2H), 6.83 (d,  $J = 15.2$  Hz, 1H).  **$^{13}\text{C}$  NMR (100 MHz,  $\text{CDCl}_3$ ):**  $\delta$  194.2, 191.3, 147.1, 143.1, 141.9, 135.6, 133.8, 133.4, 133.3, 133.2, 130.9, 129.4, 129.0, 128.8, 128.7, 128.43, 128.4, 127.8, 127.0, 126.8, 126.7, 123.3. **HRMS (ESI):**  $m/z$  calcd for  $\text{C}_{22}\text{H}_{16}\text{NaO}_2$  (M+Na): 335.1048. Found: 335.1051.

**(E)-3-Hydroxy-2-((E)-3-(naphthalen-2-yl)allylidene)-2,3-dihydro-1H-inden-1-one (2c).**

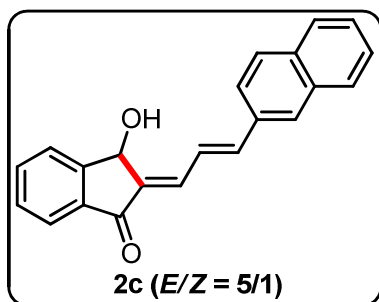

This compound was isolated as pale yellow solid. Following the general procedure-4, 30 mg of **1c** afforded 29 mg of **2c** (95% yield). M.P = 169-171 °C.  $R_f$  = 0.2 (Hexane/EtOAc = 3/1). **IR (thin film, neat):**  $\nu_{\max}/\text{cm}^{-1}$  3660, 2937, 1697, 1604, 1072, 1022, 746.  **$^1\text{H}$  NMR (400 MHz,  $(\text{CD}_3)_2\text{SO}$ ):**  $\delta$  8.08 (s, 1H), 7.99-7.87 (m, 4H), 7.81-7.68 (m, 4H), 7.59-

7.54 (m, 3H), 7.54-7.37 (m, 2H), 6.18 (d,  $J$  = 8.4 Hz, 1H), 5.85 (d,  $J$  = 8.4 Hz, 1H).  **$^{13}\text{C}$  NMR (100 MHz,  $(\text{CD}_3)_2\text{SO}$ ):**  $\delta$  192.0, 152.9, 142.8, 140.6, 138.0, 135.6, 135.3, 134.3, 133.7, 133.5, 129.7, 129.0, 128.8, 128.7, 128.1, 127.4, 127.2, 126.9, 125.7, 124.1, 123.0, 67.7.

**HRMS (ESI):**  $m/z$  calcd for  $\text{C}_{22}\text{H}_{15}\text{O}$  (M-OH): 295.1123. Found: 295.1129.

**(S)-3-Hydroxy-2-((E)-3-(naphthalen-2-yl)allylidene)-2,3-dihydro-1H-inden-1-one (2c).**

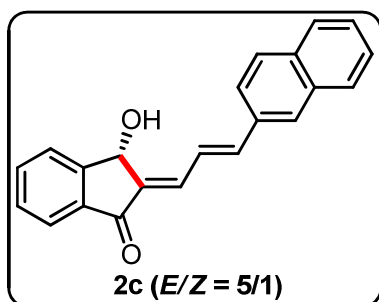

Following the general procedure-5, 20 mg of **1c** afforded 19.4 mg of **2c** (97% yield,  $E/Z$  = 5:1). **Optical rotation:**  $[\alpha]_D^{23} +78.9$  ( $c$  0.08, DMSO) for a sample with  $ee$  92%. The enantiomeric excess was determined by HPLC analysis using Daicel Chiralpak AS Column (88:12 *n*-Hexane/2-Propanol, 0.8 mL/min, 254 nm,  $\tau_{\text{major}}$  = 22.1 min,  $\tau_{\text{minor}}$  =

30.2 min).

**2-((2E,4E)-5-(3,4-Dimethoxyphenyl)penta-2,4-dienoyl)benzaldehyde (1d).**

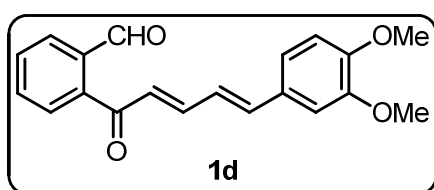

This compound was prepared by following the general procedure-2 and isolated as pale yellow oil.  $R_f$  = 0.4 (Hexane/EtOAc = 3/1). **IR (thin film, neat):**  $\nu_{\max}/\text{cm}^{-1}$  2956, 2925, 1712, 1654, 1463, 1378, 1267, 1023, 745.

**$^1\text{H}$  NMR (400 MHz,  $\text{CDCl}_3$ ):**  $\delta$  10.17 (s, 1H), 8.00 (d,  $J$  = 7.6 Hz, 1H), 7.68-7.62 (m, 3H), 7.30-7.23 (m, 1H), 7.05-7.02 (m, 2H), 6.90-6.85 (m, 3H), 6.75 (d,  $J$  = 14.9 Hz, 1H), 3.93 (s, 3H), 3.91 (s, 3H).  **$^{13}\text{C}$  NMR (100 MHz,  $\text{CDCl}_3$ ):**  $\delta$  194.2, 191.2, 150.6, 149.2, 147.6, 143.2, 142.1, 135.4, 133.2, 130.8, 129.2, 128.8, 128.3, 128.0, 124.5, 121.8, 111.1, 109.1, 56.0, 55.9.

**HRMS (ESI):**  $m/z$  calcd for  $\text{C}_{20}\text{H}_{19}\text{O}_4$  (M+H): 323.1283. Found: 323.1290.

**(E)-2-((E)-3-(3,4-dimethoxyphenyl)allylidene)-3-hydroxy-2,3-dihydro-1H-inden-1-one**

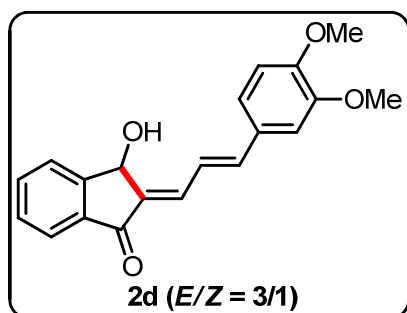

**(2d).** This compound was isolated as pale brown solid. Following the general procedure-4, 30 mg of **1d** afforded 27 mg of **2d** (90% yield). M.P = 144-146 °C.  $R_f = 0.2$  (Hexane/EtOAc = 3/1). **IR (thin film, neat):**  $\nu_{\max}/\text{cm}^{-1}$  3456, 2932, 1694, 1608, 1517, 1269, 1023, 759.  **$^1\text{H NMR}$  (400 MHz,  $(\text{CD}_3)_2\text{SO}$ ):**  $\delta$  7.77-7.76 (m, 2H), 7.72 (d,  $J = 7.6$  Hz, 1H), 7.57-7.53 (m, 1H), 7.43 (dd,  $J = 15.4$  and 12.1 Hz, 1H), 7.31-7.16 (m, 4H), 7.02 (d,  $J = 8.4$  Hz, 1H), 6.11 (d,  $J = 8.0$  Hz, 1H), 5.80 (d,  $J = 8.0$  Hz, 1H), 3.85 (s, 3H), 3.81 (s, 3H).  **$^{13}\text{C NMR}$  (100 MHz,  $(\text{CD}_3)_2\text{SO}$ ):**  $\delta$  191.9, 152.8, 150.7, 149.4, 143.4, 139.2, 138.1, 135.8, 135.4, 129.6, 129.5, 126.8, 123.0, 122.9, 122.2, 112.2, 110.1, 67.7, 56.0, 55.9. **HRMS (ESI):**  $m/z$  calcd for  $\text{C}_{20}\text{H}_{17}\text{O}_3$  (M-OH): 305.1178. Found: 305.1180.

**(S)-2-((E)-3-(3,4-dimethoxyphenyl)allylidene)-3-hydroxy-2,3-dihydro-1H-inden-1-one**

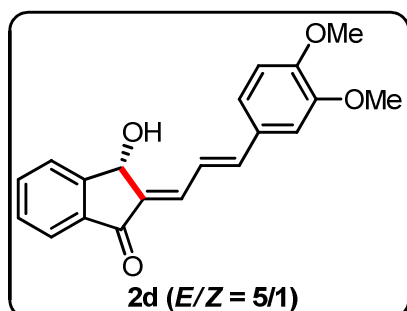

**(2d).** Following the general procedure-5, 20 mg of **1d** afforded 17.5 mg of **2d** (87% yield,  $E/Z = 5:1$ ). **Optical rotation:**  $[\alpha]_D^{23} +135.8$  ( $c$  0.18,  $\text{CHCl}_3$ ) for a sample with  $ee$  78%. The enantiomeric excess was determined by HPLC analysis using Daicel Chiralpak AD Column (85:15 *n*-Hexane/2-Propanol, 1.0 mL/min, 254 nm,  $\tau_{\text{major}} = 20.3$  min,  $\tau_{\text{minor}} = 29.1$  min).

**2-((2E,4E)-5-Phenylhexa-2,4-dienoyl)benzaldehyde (1e).**

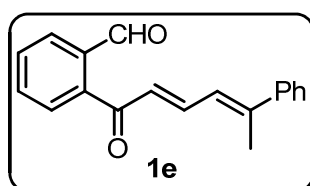

This compound was prepared by following the general procedure-2 and isolated as pale yellow oil.  $R_f = 0.4$  (Hexane/EtOAc = 4/1). **IR (thin film, neat):**  $\nu_{\max}/\text{cm}^{-1}$  3379, 3058, 1695, 1651, 1578, 1445, 1291, 1022, 761.  **$^1\text{H NMR}$  (400 MHz,  $\text{CDCl}_3$ ):**  $\delta$  10.22 (s, 1H), 8.02 (d,  $J = 7.3$  Hz, 1H), 7.74-7.66 (m, 3H), 7.55-7.53 (m, 2H), 7.42-7.35 (m, 4H), 6.82 (d,  $J = 15.4$  Hz, 1H), 6.73 (d,  $J = 7.5$  Hz, 1H), 2.30 (s, 3H).  **$^{13}\text{C NMR}$  (100 MHz,  $\text{CDCl}_3$ ):**  $\delta$  193.9, 191.4, 148.7, 142.7, 142.2, 141.6, 135.7, 133.1, 131.0, 129.2, 128.8, 128.6(2C), 128.4, 128.3, 126.0(2C), 125.2, 16.8. **HRMS (ESI):**  $m/z$  calcd for  $\text{C}_{19}\text{H}_{17}\text{O}_2$  (M+H) $^+$ : 277.1229. Found: 277.1223.

**(E)-3-Hydroxy-2-((E)-3-phenylbut-2-en-1-ylidene)-2,3-dihydro-1H-inden-1-one (2e).**

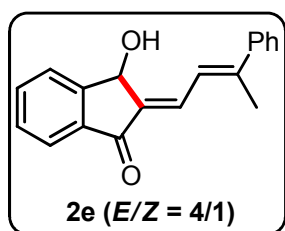

This compound was isolated as pale yellow solid. Following the general procedure-4, 25 mg of **1e** afforded 22 mg of **2e** (87% yield). M.P = 158-160 °C.  $R_f$  = 0.4 (Hexane/EtOAc = 3/1). **IR (thin film, neat):**  $\nu_{\max}/\text{cm}^{-1}$  3416, 3006, 1681, 1610, 1275, 749.  **$^1\text{H}$  NMR (400 MHz,  $\text{CDCl}_3$ ):**  $\delta$  7.80-7.75 (m, 1H), 7.70 (t,  $J$  = 7.2 Hz, 1H), 7.62-7.60 (m, 2H), 7.50-7.37 (m, 6H), 7.29-7.25 (m, 1H), 5.83 (s, 1H), 2.48 (br s, 1H), 2.39 (s, 3H).  **$^{13}\text{C}$  NMR (100 MHz,  $\text{CDCl}_3$ ):**  $\delta$  192.2, 151.0, 149.9, 141.9, 138.2, 138.0, 135.2, 132.8, 129.6, 128.8, 128.5(2C), 126.2(2C), 125.9, 123.5, 122.4, 69.1, 16.5. **HRMS (ESI):**  $m/z$  calcd for  $\text{C}_{19}\text{H}_{15}\text{O}$  (M-OH): 259.1123. Found: 259.1136.

**(E)-2-(5,5-Diphenylpenta-2,4-dienoyl)benzaldehyde (1f).**

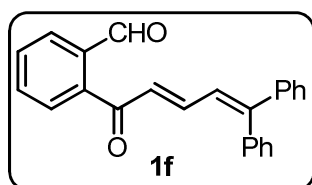

This compound was prepared by following the general procedure-2 and isolated as pale yellow oil.  $R_f$  = 0.4 (Hexane/EtOAc = 4/1). **IR (thin film, neat):**  $\nu_{\max}/\text{cm}^{-1}$  3378, 3057, 2854, 1696, 1647, 1577, 1445, 1278, 1023, 772, 700.  **$^1\text{H}$  NMR (400 MHz,  $\text{CDCl}_3$ ):**  $\delta$  10.15 (s, 1H), 7.95-7.93 (m, 1H), 7.64-7.58 (m, 2H), 7.40-7.17 (m, 12H), 6.93 (d,  $J$  = 11.2 Hz, 1H), 6.85 (dd,  $J$  = 15.2 and 0.6 Hz, 1H).  **$^{13}\text{C}$  NMR (100 MHz,  $\text{CDCl}_3$ ):**  $\delta$  194.1, 191.2, 153.8, 145.1, 142.0, 141.0, 138.2, 135.5, 133.1, 130.8, 130.4(2C), 129.6, 129.2, 129.1, 128.6, 128.5(2C), 128.4(2C), 128.3(2C), 125.5. **HRMS (ESI):**  $m/z$  calcd for  $\text{C}_{24}\text{H}_{19}\text{O}_2$  (M+H): 339.1385. Found: 339.1392.

**(E)-2-(3,3-Diphenylallylidene)-3-hydroxy-2,3-dihydro-1H-inden-1-one (2f).**

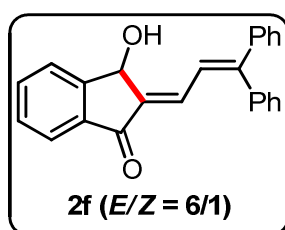

This compound was isolated as pale yellow solid. Following the general procedure-4, 30 mg of **1f** afforded 28 mg of **2f** (93% yield). M.P = 162-164 °C.  $R_f$  = 0.3 (Hexane/EtOAc = 4/1). **IR (thin film, neat):**  $\nu_{\max}/\text{cm}^{-1}$  3395, 3056, 1681, 1610, 1275, 749.  **$^1\text{H}$  NMR (400 MHz,  $\text{CDCl}_3$ ):**  $\delta$  7.80 (d,  $J$  = 6.5 Hz, 2H), 7.70-7.66 (m, 1H), 7.50-7.34 (m, 11H), 7.28-7.25 (m, 2H), 5.88 (d,  $J$  = 7.2 Hz, 1H), 2.39 (d,  $J$  = 7.1 Hz, 1H).  **$^{13}\text{C}$  NMR (100 MHz,  $\text{CDCl}_3$ ):**  $\delta$  191.7, 154.2, 150.8, 141.5, 139.2, 138.3, 138.2, 135.1, 134.5, 130.6(2C), 129.6, 129.1, 128.6, 128.5(2C), 128.4(2C), 128.3 (2C), 125.9, 123.5, 122.9, 69.2. **HRMS (ESI):**  $m/z$  calcd for  $\text{C}_{24}\text{H}_{17}\text{O}$  (M-OH): 321.1279. Found: 321.1283.

**(S)-2-(3,3-Diphenylallylidene)-3-hydroxy-2,3-dihydro-1H-inden-1-one (2f).**

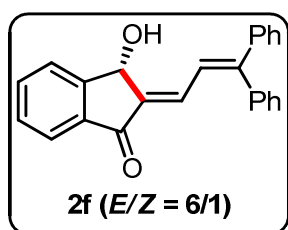

Following the general procedure-5, 25 mg of **1f** afforded 23 mg of **2f** (92% yield, *E/Z* = 6:1). **Optical rotation:**  $[\alpha]_D^{23} +20.5$  (*c* 0.05, CHCl<sub>3</sub>) for a sample with *ee* 97%. The enantiomeric excess was determined by HPLC analysis using Daicel Chiralpak AS Column (90:10 *n*-Hexane/2-Propanol, 1.0 mL/min, 254 nm,  $\tau_{\text{major}} = 44.5$

min,  $\tau_{\text{minor}} = 20.7$  min).

**5-Fluoro-2-((2E,4E)-hexa-2,4-dienoyl)benzaldehyde (1g).**

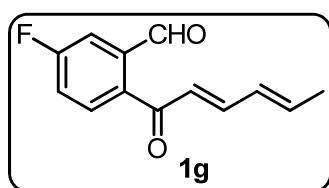

This compound was prepared by following the general procedure-2 and isolated as a pale yellow solid. M.P = 100-102 °C. *R<sub>f</sub>* = 0.4 (Hexane/EtOAc = 5/1). **IR (thin film, neat):**  $\nu_{\text{max}}/\text{cm}^{-1}$  2956, 1691, 1658, 1588, 1341, 1257, 1000, 836. **<sup>1</sup>H**

**NMR (400 MHz, CDCl<sub>3</sub>):**  $\delta$  10.14 (d, *J* = 2.8 Hz, 1H), 7.70-7.65 (m, 2H), 7.35 (dt, *J* = 8.1 and 2.6 Hz, 1H), 7.20-7.13 (m, 1H), 6.61 (d, *J* = 15.2 Hz, 1H), 6.34-6.29 (m, 2H), 1.93 (d, *J* = 6.0 Hz, 3H). **<sup>13</sup>C NMR (100 MHz, CDCl<sub>3</sub>):**  $\delta$  192.5, 189.9, 163.2 (d, *J* = 260.3 Hz), 147.9, 143.1, 138.5 (d, *J* = 6.2 Hz), 138.1 (d, *J* = 3.7 Hz), 131.0 (d, *J* = 8.2 Hz), 130.2, 126.4, 119.8 (d, *J* = 22.1 Hz), 115.5 (d, *J* = 23.0 Hz), 19.0. **<sup>19</sup>F NMR (376 MHz, CDCl<sub>3</sub>):**  $\delta$  -106.7. **HRMS (ESI):** *m/z* calcd for C<sub>13</sub>H<sub>12</sub>FO<sub>2</sub> (M+H): 219.0821. Found: 219.0821.

**(E)-2-((E)-But-2-en-1-ylidene)-5-fluoro-3-hydroxy-2,3-dihydro-1H-inden-1-one (2g).**

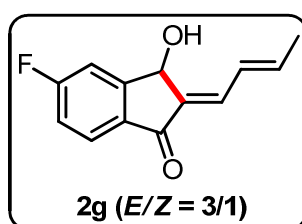

This compound was isolated as pale yellow solid. Following the general procedure-4, 30 mg of **1g** afforded 29 mg of **2g** (97% yield). M.P = 159-161 °C. *R<sub>f</sub>* = 0.3 (Hexane/EtOAc = 5/1). **IR (thin film, neat):**  $\nu_{\text{max}}/\text{cm}^{-1}$  3442, 2927, 1703, 1634, 1266, 1015, 750. **<sup>1</sup>H NMR (400 MHz, CDCl<sub>3</sub>):**  $\delta$  7.75-7.72 (m, 1H), 7.42 (dd,

*J* = 8.1 and 1.9 Hz, 1H), 7.24 (dd, *J* = 11.2 and 2.4 Hz, 1H), 7.18-7.13 (m, 1H), 6.84-6.77 (m, 1H), 6.40 (sextet, *J* = 3.2 Hz, 1H), 5.60 (s, 1H), 2.42 (br s, 1H), 2.01 (dd, *J* = 6.8 and 1.2 Hz, 3H). **<sup>13</sup>C NMR (100 MHz, CDCl<sub>3</sub>):**  $\delta$  190.6, 163.3 (d, *J* = 253.1 Hz), 144.3, 137.5, 135.9, 134.2, 127.5, 125.8 (d, *J* = 10.3 Hz), 117.6 (d, *J* = 32.0 Hz), 117.5, 112.8 (d, *J* = 25.3 Hz), 68.7, 19.4. **<sup>19</sup>F NMR (376 MHz, CDCl<sub>3</sub>):**  $\delta$  -101.1. **HRMS (ESI):** *m/z* calcd for C<sub>13</sub>H<sub>10</sub>FO (M-OH): 201.0716. Found: 201.0722.

**(S)-2-((E)-But-2-en-1-ylidene)-5-fluoro-3-hydroxy-2,3-dihydro-1H-inden-1-one (2g).**

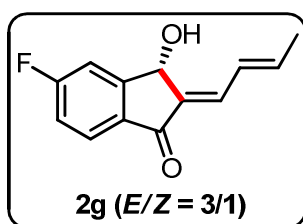

Following the general procedure-5, 20 mg of **1g** afforded 18.5 mg of **2g** (93% yield, *E/Z* = 3:1). **Optical rotation:**  $[\alpha]_D^{23} +69.1$  (*c* 0.12, CHCl<sub>3</sub>) for a sample with *ee* 99%. The enantiomeric excess was determined by HPLC analysis using Daicel Chiralpak IC Column (95:5 *n*-Hexane/2-Propanol, 1.0 mL/min, 254 nm,  $\tau_{\text{major}} = 39.5$  min,  $\tau_{\text{minor}} = 27.7$  min).

### 2-((2*E*,4*E*)-Hexa-2,4-dienyl)-5-methoxybenzaldehyde (**1h**).

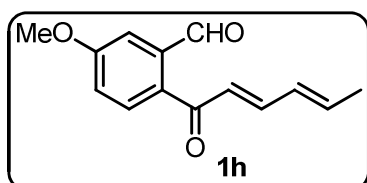

This compound was prepared by following the general procedure-2 and isolated as pale yellow solid. M.P = 82-85 °C. *R<sub>f</sub>* = 0.4 (Hexane/EtOAc = 4/1). **IR (thin film, neat):**  $\nu_{\text{max}}/\text{cm}^{-1}$  3440, 2938, 1693, 1653, 1596, 1260, 1015, 750. **<sup>1</sup>H NMR (400 MHz, CDCl<sub>3</sub>):**  $\delta$  10.20 (s, 1H), 7.67 (d, *J* = 8.5 Hz, 1H), 7.45 (d, *J* = 2.4 Hz, 1H), 7.25-7.12 (m, 2H), 6.65 (d, *J* = 15.2 Hz, 1H), 6.33-6.27 (m, 2H), 3.92 (s, 3H), 1.91 (d, *J* = 6.0 Hz, 3H). **<sup>13</sup>C NMR (100 MHz, CDCl<sub>3</sub>):**  $\delta$  192.2, 191.6, 161.8, 146.7, 142.2, 138.6, 134.3, 130.8, 130.3, 126.1, 118.9, 112.3, 55.7, 18.9. **HRMS (ESI):** *m/z* calcd for C<sub>14</sub>H<sub>14</sub>NaO<sub>3</sub> (M+Na): 253.0841. Found: 253.0836.

### (*E*)-2-((*E*)-But-2-en-1-ylidene)-3-hydroxy-5-methoxy-2,3-dihydro-1*H*-inden-1-one (**2h**).

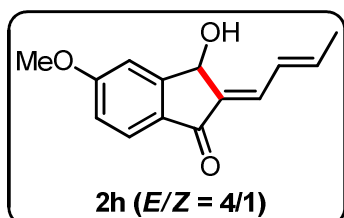

This compound was isolated as pale yellow solid. Following the general procedure-4, 30 mg of **1h** afforded 27.6 mg of **2h** (92% yield). M.P = 129-131 °C. *R<sub>f</sub>* = 0.2 (Hexane/EtOAc = 4/1). **IR (thin film, neat):**  $\nu_{\text{max}}/\text{cm}^{-1}$  3374, 2926, 1681, 1631, 1597, 1290, 1018, 759. **<sup>1</sup>H NMR (400 MHz, CDCl<sub>3</sub>):**  $\delta$  7.69-7.67 (m, 1H), 7.21-7.18 (m, 2H), 6.99-6.97 (m, 1H), 6.83-6.76 (m, 1H), 6.38-6.33 (m, 1H), 5.65 (s, 1H), 3.94 (s, 3H), 2.46 (br s, 1H), 1.98 (dd, *J* = 6.8 and 1.2 Hz, 3H). **<sup>13</sup>C NMR (100 MHz, CDCl<sub>3</sub>):**  $\delta$  190.8, 165.5, 154.1, 143.0, 136.7, 136.2, 131.3, 127.6, 125.3, 117.5, 108.9, 68.9, 55.8, 19.3. **HRMS (ESI):** *m/z* calcd for C<sub>14</sub>H<sub>15</sub>O<sub>3</sub> (M+H): 231.1021. Found: 231.1009.

### (*S*)-2-((*E*)-But-2-en-1-ylidene)-3-hydroxy-5-methoxy-2,3-dihydro-1*H*-inden-1-one (**2h**).

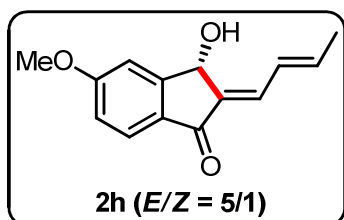

Following the general procedure-5, 25 mg of **1h** afforded 23.5 mg of **2h** (94% yield, *E/Z* = 5:1). **Optical rotation:**  $[\alpha]_D^{23} -2.7$  (*c* 0.14, CHCl<sub>3</sub>) for a sample with *ee* 94%. The enantiomeric excess was determined by HPLC analysis using Daicel

Chiralpak AS Column (90:10 *n*-Hexane/2-Propanol, 0.8 mL/min, 254 nm,  $\tau_{\text{major}} = 18.2$  min,  $\tau_{\text{minor}} = 16.2$  min).

### 5-Methoxy-2-((2*E*,4*E*)-5-phenylpenta-2,4-dienoyl)benzaldehyde (**1i**).

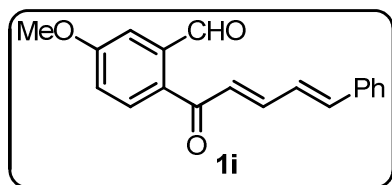

This compound was prepared by following the general procedure-2 and isolated as pale brown oil.  $R_f = 0.4$  (Hexane/EtOAc = 4/1). IR (thin film, neat):  $\nu_{\text{max}}/\text{cm}^{-1}$  3027, 1692, 1653, 1596, 1579, 1350, 1237, 1016, 736.  **$^1\text{H NMR}$  (400 MHz,  $\text{CDCl}_3$ ):**  $\delta$  10.25 (s, 1H), 7.73 (d,  $J = 8.4$  Hz, 1H), 7.51-7.34 (m, 7H), 7.16 (dd,  $J = 8.4$  and 2.7 Hz, 1H), 7.02 (d,  $J = 4.8$  Hz, 1H), 7.00 (s, 1H), 6.89 (d,  $J = 15.2$  Hz, 1H), 3.93 (s, 3H).  **$^{13}\text{C NMR}$  (100 MHz,  $\text{CDCl}_3$ ):**  $\delta$  191.6, 162.0, 146.2, 142.7, 138.9, 138.8, 135.8, 134.2, 130.9, 129.5, 128.9(2C), 127.9, 127.4(2C), 126.5, 118.9, 112.5, 55.8. **HRMS (ESI):**  $m/z$  calcd for  $\text{C}_{19}\text{H}_{17}\text{O}_3$  (M+H): 293.1178. Found: 293.1178.

### (*E*)-3-Hydroxy-5-methoxy-2-((*E*)-3-phenylallylidene)-2,3-dihydro-1*H*-inden-1-one (**2i**).

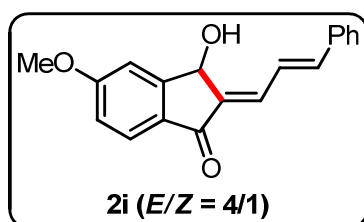

This compound was isolated as pale yellow solid. Following the general procedure-4, 30 mg of **1i** afforded 27 mg of **2i** (90% yield). M.P = 170-172 °C.  $R_f = 0.2$  (Hexane/EtOAc = 3/1). IR (thin film, neat):  $\nu_{\text{max}}/\text{cm}^{-1}$  3308, 2928, 1667, 1601, 1275, 1260, 1020, 749.  **$^1\text{H NMR}$  (400 MHz,  $(\text{CD}_3)_2\text{SO}$ ):**  $\delta$  7.68 (d,  $J = 8.3$  Hz, 1H), 7.64-7.62 (m, 2H), 7.55 (dd,  $J = 16.0$  and 12.0 Hz, 1H), 7.45-7.42 (m, 2H), 7.38-7.35 (m, 1H), 7.24-7.18 (m, 3H), 7.09 (dd,  $J = 8.0$  and 2.4 Hz, 1H), 6.12 (d,  $J = 8.4$  Hz, 1H), 5.73 (d,  $J = 8.2$  Hz, 1H), 3.91 (s, 3H).  **$^{13}\text{C NMR}$  (100 MHz,  $(\text{CD}_3)_2\text{SO}$ ):**  $\delta$  190.2, 165.5, 155.9, 141.9, 141.0, 136.7, 133.9, 131.3, 129.6, 129.4(2C), 127.8(2C), 125.2, 125.0, 117.4, 110.0, 67.7, 56.3. **HRMS (ESI):**  $m/z$  calcd for  $\text{C}_{19}\text{H}_{15}\text{O}_2$  (M-OH): 275.1072. Found: 275.1085.

### (*S*)-3-Hydroxy-5-methoxy-2-((*E*)-3-phenylallylidene)-2,3-dihydro-1*H*-inden-1-one (**2i**).

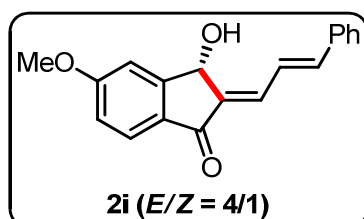

Following the general procedure-5, 18 mg of **1i** afforded 17 mg of **2i** (95% yield,  $E/Z = 4:1$ ). **Optical rotation:**  $[\alpha]_{\text{D}}^{23} +125.2$  ( $c$  0.10,  $\text{CHCl}_3$ ) for a sample with  $ee$  96%. The enantiomeric excess was determined by HPLC analysis using Daicel Chiralcel OD-H Column (80:10 *n*-Hexane/2-Propanol, 1.0 mL/min, 254 nm,  $\tau_{\text{major}} = 28.7$  min,  $\tau_{\text{minor}} = 22.0$  min).



**(E)-2-(5,5-Diphenylpenta-2,4-dienoyl)-5-methoxybenzaldehyde (1j).**

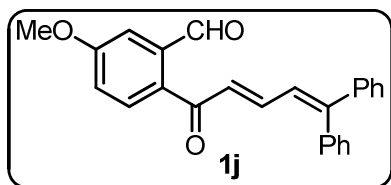

This compound was prepared by following the general procedure-2 and isolated as pale brown oil.  $R_f = 0.4$  (Hexane/EtOAc = 3/1). **IR (thin film, neat):**  $\nu_{\max}/\text{cm}^{-1}$  3055, 1690, 1595, 1577, 1444, 1276, 1018, 765.  **$^1\text{H NMR}$  (400 MHz,  $\text{CDCl}_3$ ):**  $\delta$  10.22 (s, 1H), 7.75-7.70 (m, 1H), 7.44-7.36 (m, 11H), 7.24-7.21 (m, 1H), 7.15-7.11 (m, 1H), 7.01-6.95 (m, 2H), 3.98 (s, 3H).  **$^{13}\text{C NMR}$  (100 MHz,  $\text{CDCl}_3$ ):**  $\delta$  191.7, 191.5, 161.9, 153.4, 144.0, 141.2, 138.9, 138.4, 134.3, 130.8, 130.4(2C), 129.1, 128.7, 128.6, 128.5(2C), 128.4(2C), 128.3(2C), 125.7, 118.8, 112.3, 55.8. **HRMS (ESI):**  $m/z$  calcd for  $\text{C}_{25}\text{H}_{21}\text{O}_3$  (M+H): 369.1491. Found: 369.1479.

**(E)-2-(3,3-Diphenylallylidene)-3-hydroxy-5-methoxy-2,3-dihydro-1H-inden-1-one (2j).**

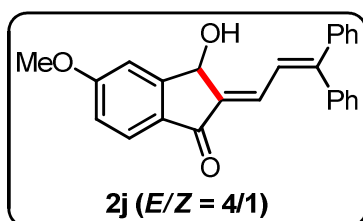

This compound was isolated as pale yellow solid. Following the general procedure-4, 20 mg of **1j** afforded 18.5 mg of **2j** (92% yield). M.P = 191-193 °C.  $R_f = 0.3$  (Hexane/EtOAc = 3/1). **IR (thin film, neat):**  $\nu_{\max}/\text{cm}^{-1}$  3006, 2919, 1691, 1609, 1275, 1260, 750.  **$^1\text{H NMR}$  (400 MHz,  $(\text{CD}_3)_2\text{SO}$ ):**  $\delta$  7.63 (d,  $J = 8.8$  Hz, 1H), 7.54-7.50 (m, 4H), 7.43-7.35 (m, 5H), 7.25-7.23 (m, 3H), 7.07 (dd,  $J = 8.6$  and 2.2 Hz, 1H), 6.96 (dd,  $J = 8.1$  and 1.4 Hz, 1H), 6.15 (d,  $J = 8.0$  Hz, 1H), 5.78 (d,  $J = 7.9$  Hz, 1H), 3.91 (s, 3H).  **$^{13}\text{C NMR}$  (100 MHz,  $(\text{CD}_3)_2\text{SO}$ ):**  $\delta$  190.1, 165.6, 156.0, 151.2, 141.9, 141.3, 138.5, 131.2, 130.7, 130.5(2C), 129.4, 129.1(2C), 129.0(2C), 128.9, 128.2(2C), 125.0, 123.7, 117.3, 169.9, 67.7, 56.3. **HRMS (ESI):**  $m/z$  calcd for  $\text{C}_{25}\text{H}_{19}\text{O}_2$  (M-OH): 351.1385. Found: 351.1399.

**(S)-2-(3,3-Diphenylallylidene)-3-hydroxy-5-methoxy-2,3-dihydro-1H-inden-1-one (2j).**

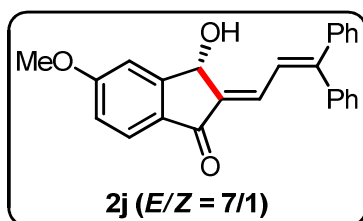

Following the general procedure-5, 15 mg of **1j** afforded 13 mg of **2j** (88% yield,  $E/Z = 7:1$ ). **Optical rotation:**  $[\alpha]_D^{23} +20.2$  ( $c$  0.30,  $\text{CHCl}_3$ ) for a sample with  $ee$  97%. The enantiomeric excess was determined by HPLC analysis using Daicel Chiralpak AD Column (94:6  $n$ -Hexane/2-Propanol, 1.0 mL/min, 254 nm,  $\tau_{\text{major}} = 39.8$  min,  $\tau_{\text{minor}} = 30.2$  min).

**2-((2E,4E)-Hexa-2,4-dienoyl)-4,5-dimethoxybenzaldehyde (1k).**



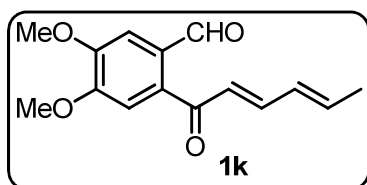

This compound was prepared by following the general procedure-2 and isolated as a pale yellow solid. M.P = 127-129 °C.  $R_f = 0.3$  (Hexane/EtOAc = 4/1). **IR (thin film, neat):**  $\nu_{\max}/\text{cm}^{-1}$  3006, 2851, 1672, 1588, 1519, 1355, 1283,

1118, 871, 736.  **$^1\text{H NMR}$  (400 MHz,  $\text{CDCl}_3$ ):**  $\delta$  10.05 (s, 1H), 7.50 (s, 1H), 7.15-7.08 (m, 1H), 7.03 (s, 1H), 6.54 (d,  $J = 15.2$  Hz, 1H), 6.32-6.25 (m, 2H), 3.98 (s, 6H), 1.89 (d,  $J = 6.2$  Hz, 3H).  **$^{13}\text{C NMR}$  (100 MHz,  $\text{CDCl}_3$ ):**  $\delta$  193.5, 189.8, 152.7, 150.7, 147.4, 142.7, 137.1, 130.2, 129.2, 127.5, 110.5, 109.5, 56.3, 56.2, 19.0. **HRMS (ESI):**  $m/z$  calcd for  $\text{C}_{15}\text{H}_{16}\text{NaO}_4$  (M+H): 283.0946. Found: 283.0965.

**(E)-2-((E)-But-2-en-1-ylidene)-3-hydroxy-5,6-dimethoxy-2,3-dihydro-1H-inden-1-one**

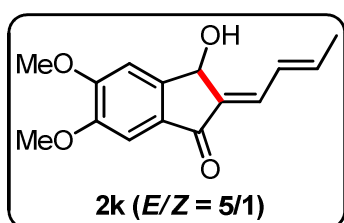

**(2k).**

This compound was isolated as Pale yellow solid. Following the general procedure-4, 25 mg of **1k** afforded 23 mg of **2k** (91% yield). M.P = 147-149 °C.  $R_f = 0.2$  (Hexane/EtOAc = 3/1). **IR (thin film, neat):**  $\nu_{\max}/\text{cm}^{-1}$  3374, 2931, 1682, 1591,

1306, 1100, 760.  **$^1\text{H NMR}$  (400 MHz,  $\text{CDCl}_3$ ):**  $\delta$  7.17 (s, 1H), 7.05 (d,  $J = 12.1$  Hz, 1H), 7.02 (s, 1H), 6.84-6.77 (m, 1H), 6.34-6.29 (m, 1H), 5.60 (s, 1H), 4.02 (s, 3H), 3.89 (s, 3H), 2.55 (br s, 1H), 1.98 (dd,  $J = 6.8$  and 0.8 Hz, 3H).  **$^{13}\text{C NMR}$  (100 MHz,  $\text{CDCl}_3$ ):**  $\delta$  191.3, 155.6, 150.8, 146.4, 142.7, 136.8, 135.6, 131.3, 127.7, 106.7, 103.8, 68.8, 56.4, 56.1, 19.2. **HRMS (ESI):**  $m/z$  calcd for  $\text{C}_{15}\text{H}_{15}\text{O}_3$  (M-OH): 243.1021. Found: 243.1035.

**(S)-2-((E)-But-2-en-1-ylidene)-3-hydroxy-5,6-dimethoxy-2,3-dihydro-1H-inden-1-one**

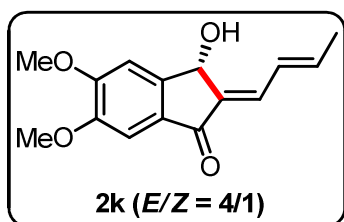

**(2k).** Following the general procedure-5, 25 mg of **1k** afforded

23 mg of **2k** (93% yield,  $E/Z = 4:1$ ). **Optical rotation:**  $[\alpha]_{\text{D}}^{23} -49.6$  ( $c$  0.15,  $\text{CHCl}_3$ ) for a sample with  $ee$  93%. The enantiomeric excess was determined by HPLC analysis using Daicel Chiralpak AD Column (88:12  $n$ -Hexane/2-Propanol,

0.7 mL/min, 254 nm,  $\tau_{\text{major}} = 20.8$  min,  $\tau_{\text{minor}} = 25.6$  min).

**2-((2E,4Z)-4-(Chroman-4-ylidene)but-2-enoyl)benzaldehyde (1l).**

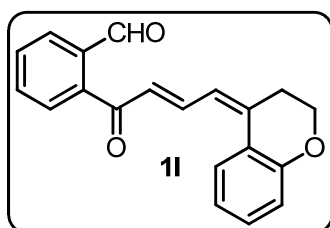

This compound was prepared by following the general procedure-2 and isolated as pale brown oil.  $R_f = 0.4$  (Hexane/EtOAc = 4/1). **IR (thin film, neat):**  $\nu_{\max}/\text{cm}^{-1}$  2925,

1694, 1646, 1578, 1481, 1276, 750. <sup>1</sup>H NMR (400 MHz, CDCl<sub>3</sub>): δ 10.22 (s, 1H), 8.01 (d, *J* = 7.2 Hz, 1H), 7.71-7.64 (m, 5H), 7.28-7.26 (m, 1H), 6.98-6.95 (m, 1H), 6.92-6.87 (m, 2H), 6.84 (d, *J* = 15.2 Hz, 1H), 4.27 (t, *J* = 6.0 Hz, 2H), 2.90 (t, *J* = 6.1 Hz, 2H). <sup>13</sup>C NMR (100 MHz, CDCl<sub>3</sub>): δ 193.4, 191.4, 156.0, 142.2, 141.4, 141.2, 135.7, 133.2, 131.2, 131.0, 129.2, 128.3, 128.1, 124.4, 121.5, 121.2, 118.8, 118.0, 65.6, 26.5. HRMS (ESI): *m/z* calcd for C<sub>20</sub>H<sub>17</sub>O<sub>3</sub> (M+H): 305.1178. Found: 305.1163.

**(*E*)-2-((*Z*)-2-(Chroman-4-ylidene)ethylidene)-3-hydroxy-2,3-dihydro-1*H*-inden-1-one (2l).**

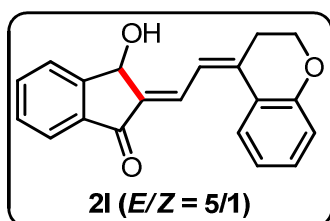

This compound was isolated as Pale brown solid. Following the general procedure-4, 25 mg of **1l** afforded 22 mg of **2l** (89% yield). M.P = 166-168 °C. R<sub>f</sub> = 0.3 (Hexane/EtOAc = 4/1). IR (thin film, neat): ν<sub>max</sub>/cm<sup>-1</sup> 3400, 3002, 1683, 1609, 1260, 750. <sup>1</sup>H NMR (400 MHz, CDCl<sub>3</sub>): δ 7.82-7.78 (m, 3H), 7.72-7.63 (m, 2H), 7.49 (t, *J* = 8.0 Hz, 1H), 7.43-7.40 (m, 1H), 7.28-7.24 (m, 1H), 6.97 (dt, *J* = 6.9 and 1.2 Hz, 1H), 6.90 (dd, *J* = 8.0 and 1.1 Hz, 1H), 5.85 (s, 1H), 4.27 (t, *J* = 6.0 Hz, 2H), 3.01-2.97 (m, 2H), 2.62 (br s, 1H). <sup>13</sup>C NMR (100 MHz, CDCl<sub>3</sub>): δ 192.0, 156.0, 151.1, 142.0, 138.1, 137.9, 135.1, 131.6, 131.2, 129.6, 125.9, 124.9, 123.5, 121.9, 121.2, 117.9, 116.2, 69.1, 65.7, 26.3. HRMS (ESI): *m/z* calcd for C<sub>20</sub>H<sub>15</sub>O<sub>2</sub> (M-OH): 287.1072. Found: 287.1099.

**(2*E*,4*E*)-1-(2-Benzoylphenyl)hexa-2,4-dien-1-one (1m).**

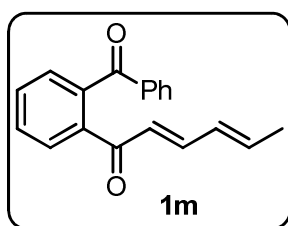

This compound was prepared by following the general procedure-2 and isolated as pale brown oil. R<sub>f</sub> = 0.5 (Hexane/EtOAc = 4/1). IR (thin film, neat): ν<sub>max</sub>/cm<sup>-1</sup> 3451, 3061, 2930, 1664, 1587, 1448, 1284, 704. <sup>1</sup>H NMR (400 MHz, CDCl<sub>3</sub>): δ 7.79-7.77 (m, 3H), 7.61-7.56 (m, 2H), 7.55-7.48 (m, 2H), 7.44-7.40 (m, 2H), 7.16-7.10 (m, 1H), 6.56 (d, *J* = 15.1 Hz, 1H), 6.24-6.17 (m, 2H), 1.86 (d, *J* = 6.2 Hz, 3H). <sup>13</sup>C NMR (100 MHz, CDCl<sub>3</sub>): δ 197.4, 192.5, 146.5, 141.7, 140.6, 139.3, 137.2, 132.9, 131.0, 130.3, 129.9, 129.6(2C), 128.7, 128.6, 128.3(2C), 125.1, 18.9. HRMS (ESI): *m/z* calcd for C<sub>19</sub>H<sub>17</sub>O<sub>2</sub> (M+H): 277.1229. Found: 277.1244.

**(*E*)-2-((*E*)-But-2-en-1-ylidene)-3-hydroxy-3-phenyl-2,3-dihydro-1*H*-inden-1-one (2m).**

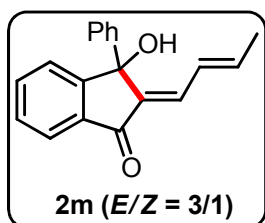

This compound was isolated as pale yellow sticky oil. Following the general procedure-4, 25 mg of **1m** afforded 23 mg of **2m** (92% yield).  $R_f = 0.2$  (Hexane/EtOAc = 4/1). **IR (thin film, neat):**  $\nu_{\max}/\text{cm}^{-1}$  3413, 2929, 1687, 1624, 1288, 982, 699.  **$^1\text{H NMR}$  (400 MHz,  $\text{CDCl}_3$ ):**  $\delta$  7.75 (d,  $J = 8.4$  Hz, 1H), 7.65 (dt,  $J = 11.6$  and 1.2 Hz, 1H), 7.50 (dt,  $J = 7.7$  and 0.9 Hz, 1H), 7.37-7.33 (m, 3H), 7.31-7.27 (m, 2H), 7.21-7.17 (m, 1H), 7.04 (d,  $J = 10.6$  Hz, 1H), 6.56 (s, 1H), 6.36-6.29 (m, 2H), 1.72 (d,  $J = 5.8$  Hz, 3H).  **$^{13}\text{C NMR}$  (100 MHz,  $\text{CDCl}_3$ ):**  $\delta$  192.7, 157.3, 145.9, 143.1, 142.2, 136.4, 136.0, 134.6, 129.4, 128.6(2C), 127.8, 127.0, 125.7, 125.5(2C), 122.9, 77.6, 19.5. **HRMS (ESI):**  $m/z$  calcd for  $\text{C}_{19}\text{H}_{15}\text{O}$  (M-OH): 259.1123. Found: 259.1143.

#### 1-((2E,4E)-Hexa-2,4-dienoyl)-2-naphthaldehyde (**1n**).

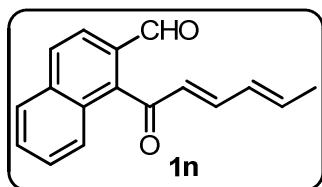

This compound was prepared by following the general procedure-2 and isolated as pale brown solid. M.P = 85-87 °C.  $R_f = 0.4$  (Hexane/EtOAc = 4/1). **IR (thin film, neat):**  $\nu_{\max}/\text{cm}^{-1}$  3016, 1697, 1275, 1260, 764, 750.  **$^1\text{H NMR}$  (400 MHz,  $\text{CDCl}_3$ ):**  $\delta$  10.17 (s, 1H), 8.05-7.94 (m, 3H), 7.85 (d,  $J = 8.8$  Hz, 1H), 7.69-7.65 (m, 1H), 7.60-7.56 (m, 1H), 6.79-6.72 (m, 1H), 6.60 (d,  $J = 15.6$  Hz, 1H), 6.31-6.28 (m, 1H), 6.09-6.03 (m, 1H), 1.85 (d,  $J = 6.8$  Hz, 3H).  **$^{13}\text{C NMR}$  (100 MHz,  $\text{CDCl}_3$ ):**  $\delta$  198.2, 190.4, 149.0, 143.3, 139.4, 136.1, 130.7, 130.4, 130.2, 129.9, 129.7, 129.3, 128.4, 127.8, 126.7, 123.0, 19.0. **HRMS (ESI):**  $m/z$  calcd for  $\text{C}_{17}\text{H}_{14}\text{O}_2$  (M+H)<sup>+</sup>: 251.1072. Found: 251.1053.

#### (E)-2-((E)-But-2-en-1-ylidene)-3-hydroxy-2,3-dihydro-1H-cyclopenta[*a*]naphthalen-1-one (**2n**).

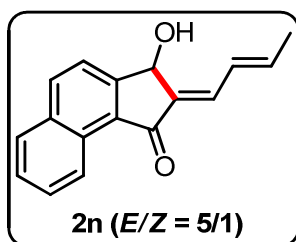

This compound was isolated as pale yellow solid. Following the general procedure-4, 30 mg of **1n** afforded 27 mg of **2n** (90% yield). M.P = 196-198 °C.  $R_f = 0.2$  (Hexane/EtOAc = 4/1). **IR (thin film, neat):**  $\nu_{\max}/\text{cm}^{-1}$  3365, 2926, 1693, 1608, 1517, 1441, 1176, 834, 760.  **$^1\text{H NMR}$  (400 MHz,  $(\text{CD}_3)_2\text{SO}$ ):**  $\delta$  9.13 (d,  $J = 8.4$  Hz, 1H), 8.31 (d,  $J = 8.4$  Hz, 1H), 8.09 (d,  $J = 8.0$  Hz, 1H), 7.83 (d,  $J = 8.4$  Hz, 1H), 7.77-7.73 (m, 1H), 7.68-7.64 (m, 1H), 7.11 (d,  $J = 11.9$  Hz, 1H), 6.86-6.79 (m, 1H), 6.45-6.40 (m, 1H), 5.99 (d,  $J = 8.4$  Hz, 1H), 5.71 (d,  $J = 8.3$  Hz, 1H), 1.94 (dd,  $J = 6.8$  and 1.1 Hz, 3H).  **$^{13}\text{C NMR}$  (100 MHz,  $(\text{CD}_3)_2\text{SO}$ ):**  $\delta$  193.0, 155.2, 141.9, 138.3, 136.5, 134.2,

133.5, 131.7, 129.5, 129.1, 128.6, 128.5, 127.6, 124.3, 123.7, 67.5, 19.5. HRMS (ESI):  $m/z$  calcd for  $C_{17}H_{14}O_2$  ( $M+H$ )<sup>+</sup>: 251.1072. Found: 251.1089.

**(S)-2-((E)-But-2-en-1-ylidene)-3-hydroxy-2,3-dihydro-1H-cyclopenta[a]naphthalen-1-**

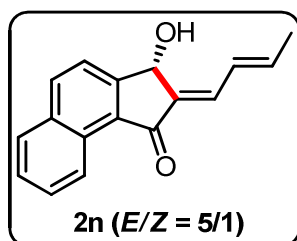

**one (2n).** Following the general procedure-5, 20 mg of **1n** afforded 18.6 mg of **2n** (93% yield,  $E/Z = 5:1$ ). **Optical rotation:**  $[\alpha]_D^{23} +44.9$  ( $c$  0.08,  $CHCl_3$ ) for a sample with  $ee$  99%. The enantiomeric excess was determined by HPLC analysis using Daicel Chiralcel OD-H Column (90:10  $n$ -Hexane/2-Propanol, 1.0

mL/min, 254 nm,  $\tau_{major} = 19.6$  min,  $\tau_{minor} = 13.7$  min).

**(E)-1-(5,5-Diphenylpenta-2,4-dienoyl)-2-naphthaldehyde (1o).**

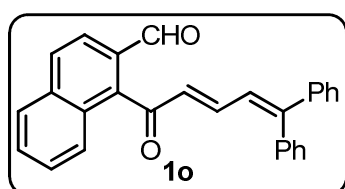

This compound was prepared by following the general procedure-2 and isolated as pale yellow solid. M.P = 122-124 °C.  $R_f = 0.4$  (Hexane/EtOAc = 3/1). **IR (thin film, neat):**  $\nu_{max}/cm^{-1}$  3007, 1695, 1641, 1604, 1275, 1260, 749. **<sup>1</sup>H NMR**

**(400 MHz,  $CDCl_3$ ):**  $\delta$  10.17 (s, 1H), 7.93-7.89 (m, 3H), 7.69-7.61 (m, 2H), 7.36-7.19 (m, 7H), 7.07 (t,  $J = 7.6$  Hz, 2H), 6.92-6.84 (m, 5H). **<sup>13</sup>C NMR (100 MHz,  $CDCl_3$ ):**  $\delta$  197.9, 190.5, 154.3, 147.2, 147.1, 143.5, 140.8, 137.8, 136.0, 132.5, 130.4, 130.3, 129.7, 129.6, 129.3, 129.2(2C), 128.4(2C), 128.3(2C), 127.9, 127.6(2C), 126.7, 125.2, 122.9. **HRMS (ESI):**  $m/z$  calcd for  $C_{28}H_{21}O_2$  ( $M+H$ ): 389.1542. Found: 389.1546.

**(E)-2-(3,3-Diphenylallylidene)-3-hydroxy-2,3-dihydro-1H-cyclopenta[a]naphthalen-1-one (2o).**

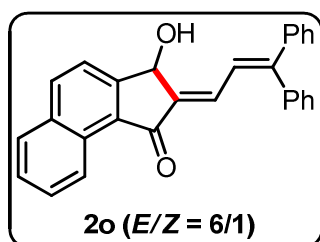

This compound was isolated as pale yellow solid. Following the general procedure-4, 35 mg of **1o** afforded 31 mg of **2o** (89% yield). M.P = 147-149 °C.  $R_f = 0.2$  (Hexane/EtOAc = 4/1). **IR (thin film, neat):**  $\nu_{max}/cm^{-1}$  3418, 3056, 1681, 1609, 1275, 1173, 749. **<sup>1</sup>H NMR (400 MHz,  $CDCl_3$ ):**  $\delta$  9.19-9.17 (m, 1H), 8.14-

8.10 (m, 1H), 7.93-7.89 (m, 1H), 7.83-7.78 (m, 1H), 7.71-7.57 (m, 2H), 7.54-7.21 (m, 12H), 5.91 (s, 1H), 2.40 (br s, 1H). **<sup>13</sup>C NMR (100 MHz,  $CDCl_3$ ):**  $\delta$  192.5, 153.5, 152.73, 152.71, 141.5, 139.5, 138.3, 136.4, 139.5, 136.4, 133.1, 130.6(2C), 129.1, 129.0, 128.9, 128.5(2C), 128.4(4C), 128.3, 127.4, 125.0, 122.9, 122.4, 69.0. **HRMS (ESI):**  $m/z$  calcd for  $C_{28}H_{19}O$  ( $M-OH$ ): 371.1436. Found: 371.1453.

**(S)-2-(3,3-Diphenylallylidene)-3-hydroxy-2,3-dihydro-1H-cyclopenta[*a*]naphthalen-1-one (2o).**

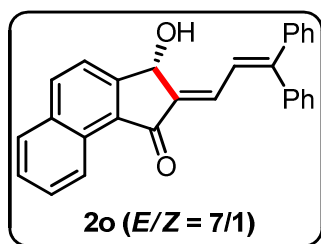

Following the general procedure-5, 24 mg of **1o** afforded 23 mg of **2o** (95% yield, *E/Z* = 7:1). **Optical rotation:**  $[\alpha]_D^{23} +114.7$  (*c* 0.18, CHCl<sub>3</sub>) for a sample with *ee* 89%. The enantiomeric excess was determined by HPLC analysis using Daicel Chiralcel OD-H Column (95:5 *n*-Hexane/2-Propanol, 1.0

mL/min, 254 nm,  $\tau_{\text{major}} = 59.6$  min,  $\tau_{\text{minor}} = 37.8$  min).

**2-((2*E*,4*E*)-Hexa-2,4-dienoyl)nicotinaldehyde (1p).**

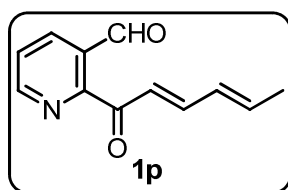

This compound was prepared by following the general procedure-2 and isolated as pale brown solid. M.P = 114-116 °C. *R*<sub>f</sub> = 0.4 (Hexane/EtOAc = 3/1). **IR (thin film, neat):**  $\nu_{\text{max}}/\text{cm}^{-1}$  3009, 1700, 1662, 1574, 1275, 997, 750. **<sup>1</sup>H NMR (400 MHz, CDCl<sub>3</sub>):**  $\delta$

10.49 (s, 1H), 8.86-8.85 (m, 1H), 8.23 (d, *J* = 7.6 Hz, 1H), 7.60 (dd, *J* = 7.6 and 4.8 Hz, 1H), 7.55-7.49 (m, 1H), 7.33 (d, *J* = 15.6 Hz, 1H), 6.41-6.37 (m, 2H), 1.94 (d, *J* = 5.6 Hz, 3H). **<sup>13</sup>C NMR (100 MHz, CDCl<sub>3</sub>):**  $\delta$  191.2, 190.8, 156.0, 151.9, 147.0, 143.1, 136.3, 133.0, 130.8, 126.2, 123.5, 19.1. **HRMS (ESI):** *m/z* calcd for C<sub>12</sub>H<sub>12</sub>NO<sub>2</sub> (M+H): 202.0868. Found: 202.0881.

**(E)-6-((*E*)-But-2-en-1-ylidene)-5-hydroxy-5H-cyclopenta[*b*]pyridin-7(6*H*)-one (2p).**

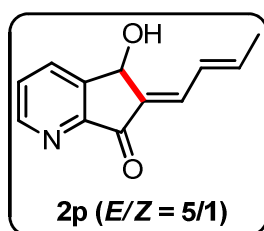

This compound was isolated as Pale brown solid. Following the general procedure-4, 20 mg of **1p** afforded 17.5 mg of **2p** (87% yield). M.P = 123-125 °C. *R*<sub>f</sub> = 0.2 (Hexane/EtOAc = 5/1). **IR (thin film, neat):**  $\nu_{\text{max}}/\text{cm}^{-1}$  3417, 2834, 1659, 1651, 1025, 999, 764. **<sup>1</sup>H NMR (400 MHz, (CD<sub>3</sub>)<sub>2</sub>SO):**  $\delta$  8.81-8.80 (m, 1H), 8.21-8.19 (m,

1H), 7.68 (dd, *J* = 8.0 and 6.9 Hz, 1H), 7.20 (d, *J* = 7.0 Hz, 1H), 6.84-6.76 (m, 1H), 6.53-6.47 (m, 1H), 6.00 (d, *J* = 8.4 Hz, 1H), 5.67 (d, *J* = 8.1 Hz, 1H), 1.94 (d, *J* = 6.8 Hz, 3H). **<sup>13</sup>C NMR (100 MHz, (CD<sub>3</sub>)<sub>2</sub>SO):**  $\delta$  191.5, 154.6, 152.2, 148.1, 144.0, 137.0, 136.8, 135.5, 128.6, 128.4, 65.9, 19.6. **HRMS (ESI):** *m/z* calcd for C<sub>12</sub>H<sub>10</sub>NO (M-OH): 184.0762. Found: 184.0756.

**(S)-6-((*E*)-But-2-en-1-ylidene)-5-hydroxy-5H-cyclopenta[*b*]pyridin-7(6*H*)-one (2p).**

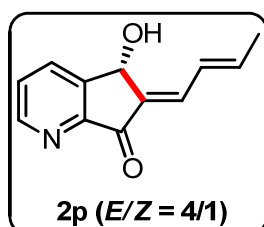

Following the general procedure-5, 20 mg of **1p** afforded 17.7 mg of **2p** (88% yield, *E/Z* = 4:1). **Optical rotation:**  $[\alpha]_D^{23} +39.2$  (*c* 0.05,

DMSO) for a sample with *ee* 96%. The enantiomeric excess was determined by HPLC analysis using Daicel Chiralpak AS Column (87:13 *n*-Hexane/2-Propanol, 1.0 mL/min, 254 nm,  $\tau_{\text{major}} = 9.2$  min,  $\tau_{\text{minor}} = 11.8$  min).

### 2-((2*E*,4*E*)-Hexa-2,4-dienoyl)benzo[*b*]thiophene-3-carbaldehyde (**1q**).

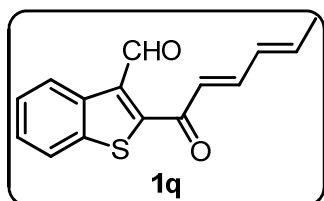

This compound was prepared by following the general procedure-1 and isolated as a pale yellow solid. M.P = 122-124 °C.  $R_f = 0.5$  (Hexane/EtOAc = 4/1). **IR (thin film, neat):**  $\nu_{\text{max}}/\text{cm}^{-1}$  3442, 3002, 1671, 1655, 1592, 1499, 1000, 751. **<sup>1</sup>H NMR (400 MHz, CDCl<sub>3</sub>):**  $\delta$  10.65 (s, 1H), 8.80-8.78 (m, 1H), 7.92-7.90 (m, 1H), 7.58-7.54 (m, 2H), 7.53-7.47 (m, 1H), 6.70 (d,  $J = 14.8$  Hz, 1H), 6.40-6.39 (m, 2H), 1.96 (d,  $J = 5.2$  Hz, 3H). **<sup>13</sup>C NMR (100 MHz, CDCl<sub>3</sub>):**  $\delta$  188.0, 184.7, 150.7, 147.7, 144.3, 138.9, 136.6, 136.4, 130.2, 127.8, 126.9, 126.7, 125.4, 122.2, 19.1. **HRMS (ESI):**  $m/z$  calcd for C<sub>15</sub>H<sub>13</sub>O<sub>2</sub>S (M+H): 257.0636. Found: 257.0654.

### (*E*)-2-((*E*)-But-2-en-1-ylidene)-1-hydroxy-1*H*-benzo[*b*]cyclopenta[*d*]thiophen-3(2*H*)-one (**2q**).

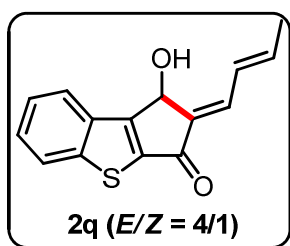

This compound was isolated as pale yellow solid. Following the general procedure-4, 25 mg of **1q** afforded 23 mg of **2q** (93% yield). M.P = 127-129 °C.  $R_f = 0.4$  (Hexane/EtOAc = 4/1). **IR (thin film, neat):**  $\nu_{\text{max}}/\text{cm}^{-1}$  3467, 2925, 1690, 1633, 1270, 1019, 760. **<sup>1</sup>H NMR (400 MHz, CDCl<sub>3</sub>):**  $\delta$  8.16-8.14 (m, 1H), 7.92-7.90 (m, 1H), 7.56-7.49 (m, 2H), 7.16 (d,  $J = 11.6$  Hz, 1H), 6.85-6.78 (m, 1H), 6.36 (sextet,  $J = 7.2$  Hz, 1H), 5.91 (d,  $J = 6.5$  Hz, 1H), 2.35 (d,  $J = 6.4$  Hz, 1H), 2.00 (dd,  $J = 6.9$  and 1.3 Hz, 3H). **<sup>13</sup>C NMR (100 MHz, CDCl<sub>3</sub>):**  $\delta$  185.4, 158.9, 148.1, 145.0, 143.2, 138.9, 135.3, 133.3, 128.3, 127.2, 125.5, 124.6, 124.3, 67.0, 19.3. **HRMS (ESI):**  $m/z$  calcd for C<sub>15</sub>H<sub>13</sub>O<sub>2</sub>S (M+H)<sup>+</sup>: 257.0636. Found: 257.0644.

### (*S*)-2-((*E*)-But-2-en-1-ylidene)-1-hydroxy-1*H*-benzo[*b*]cyclopenta[*d*]thiophen-3(2*H*)-one (**2q**).

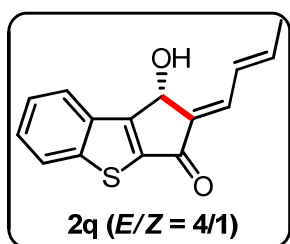

Following the general procedure-5, 20 mg of **1q** afforded 18.3 mg of **2q** (91% yield, *E/Z* = 4:1). **Optical rotation:**  $[\alpha]_{\text{D}}^{23} -36.3$  ( $c$  0.11, CHCl<sub>3</sub>) for a sample with *ee* 94%. The enantiomeric excess was determined by HPLC analysis using Daicel Chiralpak AS Column (98:2 *n*-Hexane/2-Propanol, 1.0 mL/min, 254 nm,  $\tau_{\text{major}} = 13.2$  min,  $\tau_{\text{minor}} = 23.9$  min).

**(2E,4E)-1-(3-Acetylbenzo[b]thiophen-2-yl)hexa-2,4-dien-1-one (1r).**

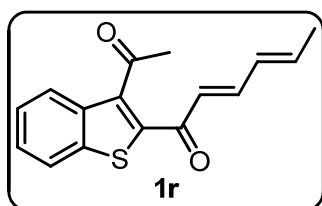

This compound was prepared by following the general procedure-1 and isolated as pale yellow oil.  $R_f = 0.4$  (Hexane/EtOAc = 4/1). **IR (thin film, neat):**  $\nu_{\max}/\text{cm}^{-1}$  3444, 3064, 2918, 1699, 1652, 1585, 1510, 1140, 757.  **$^1\text{H}$  NMR (400 MHz,  $\text{CDCl}_3$ ):**  $\delta$  7.89 (d,  $J = 8.0$  Hz, 1H), 7.85 (d,  $J = 7.9$  Hz, 1H), 7.52-7.47 (m, 3H), 6.67 (d,  $J = 14.8$  Hz, 1H), 6.37-6.35 (m, 2H), 2.62 (s, 3H), 1.94 (d,  $J = 4.8$  Hz, 3H).  **$^{13}\text{C}$  NMR (100 MHz,  $\text{CDCl}_3$ ):**  $\delta$  200.9, 184.0, 146.9, 143.5, 142.1, 140.5, 136.7, 130.2, 127.6, 125.8, 125.2, 124.5, 124.3, 122.7, 31.5, 19.1. **HRMS (ESI):**  $m/z$  calcd for  $\text{C}_{16}\text{H}_{15}\text{O}_2\text{S}$  (M+H): 271.0793. Found: 271.0793.

**(E)-2-((E)-But-2-en-1-ylidene)-1-hydroxy-1-methyl-1H-benzo[b]cyclopenta[d]thiophen-3(2H)-one (2r).**

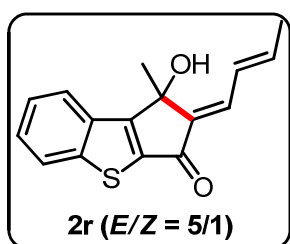

This compound was isolated as light yellow semi solid. Following the general procedure-4, 20 mg of **1r** afforded 17.8 mg of **2r** (89% yield).  $R_f = 0.3$  (Hexane/EtOAc = 3/1). **IR (thin film, neat):**  $\nu_{\max}/\text{cm}^{-1}$  3387, 2929, 1681, 1632, 1267, 1041, 735.  **$^1\text{H}$  NMR (400 MHz,  $\text{CDCl}_3$ ):**  $\delta$  8.18-8.15 (m, 1H), 7.93-7.90 (m, 1H), 7.53-7.49 (m, 2H), 7.03 (d,  $J = 12.0$  Hz, 1H), 6.97-6.93 (m, 1H), 6.34-6.28 (m, 1H), 2.61 (br s, 1H), 2.00 (dd,  $J = 6.7$  and 1.6 Hz, 3H), 1.96 (s, 3H).  **$^{13}\text{C}$  NMR (100 MHz,  $\text{CDCl}_3$ ):**  $\delta$  185.1, 162.8, 148.3, 143.0, 142.8, 133.4, 132.2, 128.8, 127.2, 126.5, 125.3, 125.0, 124.4, 74.7, 26.1, 19.3. **HRMS (ESI):**  $m/z$  calcd for  $\text{C}_{16}\text{H}_{15}\text{O}_2\text{S}$  (M+H) $^+$ : 271.0793. Found: 271.0782.

**4-((2E,4E)-Hexa-2,4-dienoyl)-2H-chromene-3-carbaldehyde (1s).**

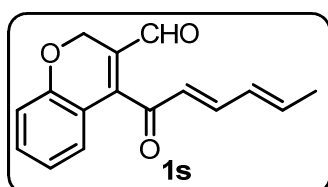

This compound was prepared by following the general procedure-2 and isolated as light brown oil.  $R_f = 0.5$  (Hexane/EtOAc = 4/1). **IR (thin film, neat):**  $\nu_{\max}/\text{cm}^{-1}$  3370, 3030, 2832, 2745, 1701, 1654, 1616, 1578, 1458, 1100, 752.  **$^1\text{H}$  NMR (400 MHz,  $\text{CDCl}_3$ ):**  $\delta$  9.65 (s, 1H), 7.36-7.32 (m, 1H), 7.16-7.09 (m, 2H), 6.97-6.94 (m, 2H), 6.37 (d,  $J = 15.2$  Hz, 1H), 6.31-6.29 (m, 2H), 5.03 (s, 2H), 1.91 (d,  $J = 5.0$  Hz, 3H).  **$^{13}\text{C}$  NMR (100 MHz,  $\text{CDCl}_3$ ):**  $\delta$  194.2, 187.8, 155.8, 149.8, 149.7, 149.3, 144.6, 133.6,



130.0, 128.6, 127.0, 122.3, 119.4, 117.2, 62.4, 19.1. **HRMS (ESI):**  $m/z$  calcd for  $C_{16}H_{15}O_3(M+H)$ : 255.1021. Found: 255.1036.

**(E)-2-((E)-But-2-en-1-ylidene)-3-hydroxy-2,3-dihydrocyclopenta[*c*]chromen-1(4*H*)-one**

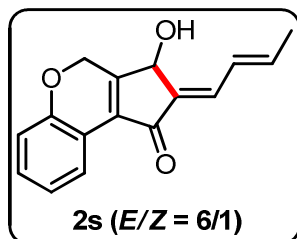

**(2s).** This compound was isolated as pale brown solid. Following the general procedure-4, 20 mg of **1s** afforded 19 mg of **2s** (93% yield). M.P = 167-169 °C.  $R_f$  = 0.3 (Hexane/EtOAc = 5/1). **IR (thin film, neat):**  $\nu_{max}/cm^{-1}$  2929, 1696, 1608, 1459, 1277, 1072, 1019, 757.  **$^1H$  NMR (400 MHz,  $CDCl_3$ ):**  $\delta$  8.16-8.12 (m, 1H), 7.24-7.20 (m, 1H), 7.05 (d,  $J$  = 11.6 Hz, 1H), 6.98-6.94 (m, 1H), 6.85 (dd,  $J$  = 8.0 and 0.8 Hz, 1H), 6.69-6.28 (m, 1H), 6.37-6.30 (m, 1H), 5.41-5.35 (m, 1H), 5.26 (s, 2H), 5.25-5.19 (m, 1H), 1.98 (dd,  $J$  = 6.8 and 1.2 Hz, 3H).  **$^{13}C$  NMR (100 MHz,  $CDCl_3$ ):**  $\delta$  190.3, 156.9, 153.0, 143.2, 134.5, 134.1, 133.9, 130.8, 127.0, 125.2, 121.7, 116.5, 115.9, 68.5, 65.2, 19.2. **HRMS (ESI):**  $m/z$  calcd for  $C_{16}H_{15}O_3 (M+H)^+$ : 255.1021. Found: 255.1043.

**(S)-2-((E)-But-2-en-1-ylidene)-3-hydroxy-2,3-dihydrocyclopenta[*c*]chromen-1(4*H*)-one**

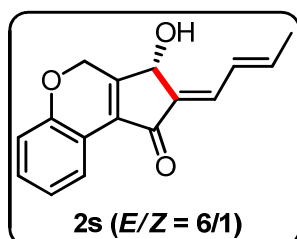

**(2s).** Following the general procedure-5, 22 mg of **1s** afforded 21.3 mg of **2s** (97% yield,  $E/Z$  = 6:1). **Optical rotation:**  $[\alpha]_D^{23} +3.1$  ( $c$  0.05,  $CHCl_3$ ) for a sample with  $ee$  95%. The enantiomeric excess was determined by HPLC analysis using Daicel Chiralcel OD-H Column (95:5 *n*-Hexane/2-Propanol, 1.0 mL/min, 254 nm,  $\tau_{major}$  = 34.6 min,  $\tau_{minor}$  = 23.4 min).

**(E)-4-(5,5-Diphenylpenta-2,4-dienoyl)-2*H*-chromene-3-carbaldehyde (1t).**

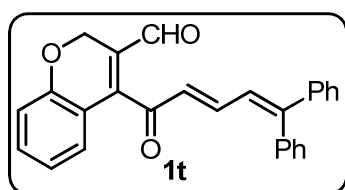

This compound was prepared by following the general procedure-2 and isolated as pale brown sticky oil.  $R_f$  = 0.4 (Hexane/EtOAc = 4/1). **IR (thin film, neat):**  $\nu_{max}/cm^{-1}$  3058, 2855, 1759, 1672, 1602, 1445, 1275, 751.  **$^1H$  NMR (400 MHz,  $CDCl_3$ ):**  $\delta$  9.66 (s, 1H), 7.40-7.35 (m, 4H), 7.34-7.28 (m, 4H), 7.27-7.25 (m, 2H), 7.12 (dd,  $J$  = 8.0 and 1.6 Hz, 1H), 7.01-6.98 (m, 3H), 6.93 (dd,  $J$  = 8.0 and 0.8 Hz, 1H), 6.89 (d,  $J$  = 11.6 Hz, 1H), 6.61 (d,  $J$  = 15.2 Hz, 1H), 4.90 (s, 2H).  **$^{13}C$  NMR (100 MHz,  $CDCl_3$ ):**  $\delta$  194.1, 187.8, 155.7, 155.5, 149.4, 148.1, 140.7, 137.8, 133.5, 130.5, 130.4(2C), 129.5, 128.9, 128.6(2C), 128.5(2C), 128.3(2C), 127.2, 126.9, 124.9, 122.1, 119.4, 117.1, 62.1. **HRMS (ESI):**  $m/z$  calcd for  $C_{27}H_{21}O_3 (M+H)^+$ : 393.1491. Found: 393.1473.



**(E)-2-(3,3-Diphenylallylidene)-3-hydroxy-2,3-dihydrocyclopenta[*c*]chromen-1(4*H*)-one**

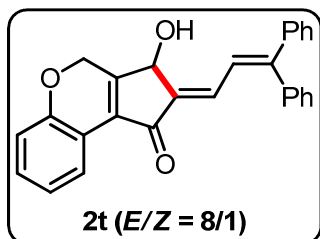

**(2t).** This compound was isolated as light yellow liquid. Following the general procedure-4, 25 mg of **1t** afforded 24 mg of **2t** (96% yield).  $R_f = 0.3$  (Hexane/EtOAc = 3/1). **IR (thin film, neat):**  $\nu_{\max}/\text{cm}^{-1}$  3437, 2924, 1634, 1614, 1269, 760.  **$^1\text{H}$  NMR (400 MHz,  $\text{CDCl}_3$ ):**  $\delta$  8.11 (dd,  $J = 7.8$  and  $0.8$  Hz,

1H), 7.44-7.43 (m, 3H), 7.36-7.35 (m, 5H), 7.32-7.28 (m, 2H), 7.26-7.19 (m, 3H), 6.96-6.93 (m, 1H), 6.92-6.83 (m, 1H), 5.42-5.20 (m, 3H), 2.07 (br s, 1H).  **$^{13}\text{C}$  NMR (100 MHz,  $\text{CDCl}_3$ ):**  $\delta$  189.9, 156.7, 153.8, 153.0, 141.4, 138.1, 136.9, 134.1, 131.8, 130.6(2C), 129.0, 128.6, 128.4(6C), 125.2, 122.3, 121.7, 116.5, 115.9, 68.7, 65.2. **HRMS (ESI):**  $m/z$  calcd for  $\text{C}_{27}\text{H}_{21}\text{O}_3$  ( $\text{M}+\text{H}$ ) $^+$ : 393.1491. Found: 393.1474.

**(S,E)-2-(3,3-Diphenylallylidene)-3-hydroxy-2,3-dihydrocyclopenta[*c*]chromen-1(4*H*)-one (2t).**

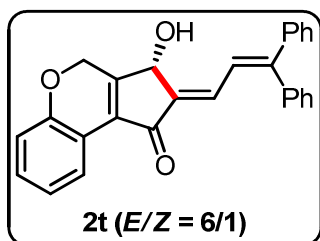

Following the general procedure-5, 20 mg of **1t** afforded 18.3 mg of **2t** (91% yield,  $E/Z = 6:1$ ). **Optical rotation:**  $[\alpha]_D^{23} +49.9$  ( $c$  0.10,  $\text{CHCl}_3$ ) for a sample with  $ee$  98%. The enantiomeric excess was determined by HPLC analysis using Daicel Chiralcel OD-H Column (93:7 *n*-Hexane/2-Propanol, 0.8

mL/min, 254 nm,  $\tau_{\text{major}} = 35.7$  min,  $\tau_{\text{minor}} = 32.3$  min).

**2-((2*E*,4*E*)-Hexa-2,4-dienoyl)thiophene-3-carbaldehyde (1u).**

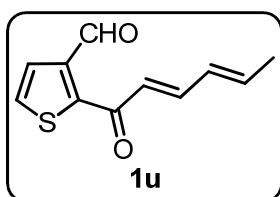

This compound was prepared by following the general procedure-2 and isolated as pale yellow oil.  $R_f = 0.5$  (Hexane/EtOAc = 4/1). **IR (thin film, neat):**  $\nu_{\max}/\text{cm}^{-1}$  2928, 1680, 1651, 1623, 1584, 1244, 1156, 732.  **$^1\text{H}$  NMR (400 MHz,  $\text{CDCl}_3$ ):**  $\delta$  10.50 (s, 1H), 7.65 (d,  $J = 4.9$  Hz, 1H), 7.50-7.47 (m, 2H), 6.68 (d,  $J = 14.8$  Hz, 1H), 6.36-6.34 (m, 2H), 1.43 (d,  $J = 5.3$  Hz, 3H).  **$^{13}\text{C}$  NMR (100 MHz,  $\text{CDCl}_3$ ):**  $\delta$  187.5, 182.8, 147.1, 146.6, 144.3, 143.5, 130.1, 129.2, 128.4, 124.6, 19.0. **HRMS (ESI):**  $m/z$  calcd for  $\text{C}_{11}\text{H}_{11}\text{O}_2\text{S}$  ( $\text{M}+\text{H}$ ) $^+$ : 207.0480.

Found: 207.0467.

**(E)-5-((E)-But-2-en-1-ylidene)-4-hydroxy-4*H*-cyclopenta[*b*]thiophen-6(5*H*)-one (2u).**

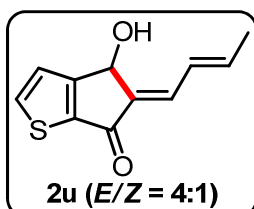

This compound was isolated as Pale yellow oil. Following the general procedure-3, 25 mg of **1u** afforded 23.5 mg of **2u** (94% yield).  $R_f = 0.3$

(Hexane/EtOAc = 3/1). **IR (thin film, neat):**  $\nu_{\max}/\text{cm}^{-1}$  3383, 2961, 2925, 1692, 1633, 1434, 1377, 1035, 732.  **$^1\text{H}$  NMR (400 MHz,  $\text{CDCl}_3$ ):**  $\delta$  7.89 (d,  $J = 4.8$  Hz, 1H), 7.30 (d,  $J = 4.9$  Hz, 1H), 7.09 (d,  $J = 12.0$  Hz, 1H), 6.77-6.69 (m, 1H), 6.34-6.29 (m, 1H), 5.65 (s, 1H), 2.41 (br.s, 1H), 1.97 (dd,  $J = 8.0$  and 1.5 Hz, 3H).  **$^{13}\text{C}$  NMR (100 MHz,  $\text{CDCl}_3$ ):**  $\delta$  184.1, 163.7, 144.6, 142.7, 140.0, 139.8, 135.4, 127.1, 123.3, 66.7, 19.2. **HRMS (ESI):**  $m/z$  calcd for  $\text{C}_{11}\text{H}_9\text{OS}$  (M-OH) $^+$ : 189.0374. Found: 189.0389.

**(*R,E*)-5-((*E*)-But-2-en-1-ylidene)-4-hydroxy-4*H*-cyclopenta[*b*]thiophen-6(5*H*)-one (2u).**

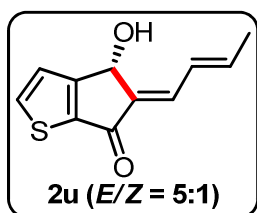

Following the general procedure-5, 20 mg of **1u** afforded 19.4 mg of **2u** (89% yield,  $E/Z = 5:1$ ). **Optical rotation:**  $[\alpha]_{\text{D}}^{23}$  -6.6 ( $c$  0.10,  $\text{CHCl}_3$ ) for a sample with  $ee$  92%. The enantiomeric excess was determined by HPLC analysis using Daicel Chiralcel OD-H Column (90:10 *n*-Hexane/2-Propanol, 1.0 mL/min, 254 nm,  $\tau_{\text{major}} = 22.1$  min,

$\tau_{\text{minor}} = 33.2$  min).

**2-((2*E*,4*E*)-3-Methyl-5-phenylpenta-2,4-dienoyl)benzaldehyde (1v).**

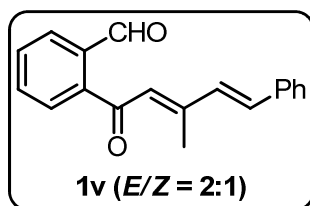

This compound was prepared by following the general procedure-2 and isolated as pale yellow oil.  $R_f = 0.4$  (Hexane/EtOAc = 4/1). **IR (thin film, neat):**  $\nu_{\max}/\text{cm}^{-1}$  2922, 1694, 1654, 1575, 1246, 968, 725.  **$^1\text{H}$  NMR (400 MHz,  $\text{CDCl}_3$ ):**  $\delta$  10.28 (s, 1H), 7.96 (d,  $J = 7.6$  Hz, 1H), 7.74-7.72 (m, 1H), 7.68-7.52 (m, 4H), 7.41-7.28 (m, 3H), 7.14 (d,  $J = 16.0$  Hz, 1H), 6.93 (d,  $J = 16.0$  Hz, 1H), 6.78 (s, 1H), 2.52 (s, 3H).  **$^{13}\text{C}$  NMR (100 MHz,  $\text{CDCl}_3$ ):**  $\delta$  192.8, 191.8, 153.9, 143.8, 136.7, 136.1, 135.8, 133.0, 132.0, 129.1, 128.9(2C), 128.8, 128.1, 127.3(2C), 125.9, 124.0, 14.7. **HRMS (ESI):**  $m/z$  calcd for  $\text{C}_{19}\text{H}_{17}\text{O}_2$  (M+H) $^+$ : 277.1229. Found: 277.1216.

**(*E*)-3-Hydroxy-2-((*E*)-4-phenylbut-3-en-2-ylidene)-2,3-dihydro-1*H*-inden-1-one (2v).**

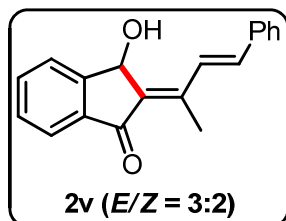

This compound was isolated as Pale yellow solid. Following the general procedure-3, 40 mg of **1v** afforded 36.5 mg of **2v** (91% yield). M.P = 127-129 °C.  $R_f = 0.2$  (Hexane/EtOAc = 4/1). **IR (thin film, neat):**  $\nu_{\max}/\text{cm}^{-1}$  3400, 2924, 1668, 1605, 1579, 1336, 1094, 751.  **$^1\text{H}$  NMR (400 MHz,  $\text{CDCl}_3$ ):**  $\delta$  7.74-7.70 (m, 2H), 7.65-7.53 (m, 4H), 7.42-7.28 (m, 4H), 7.12 (d,  $J = 16.0$  Hz, 1H), 5.8 (s, 1H), 2.92 (br.s, 2.50 (s, 3H).  **$^{13}\text{C}$  NMR (100 MHz,  $\text{CDCl}_3$ ):**  $\delta$  193.7, 149.7, 149.3, 131.9, 137.6, 136.5, 135.3, 134.9,

129.2, 128.8(2C), 128.5, 127.6(2C), 125.8, 125.7, 123.2, 69.9, 13.3. **HRMS (ESI):**  $m/z$  calcd for  $C_{19}H_{17}O_2$  (M+H)<sup>+</sup>: 277.1229. Found: 277.1215.

#### 4-Acetyl-3-methyl-9H-fluoren-9-one (13a).

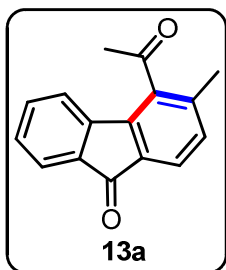

This compound was isolated as pale yellow solid. Following the general procedure-6, 30 mg of **2a** afforded 16 mg of **13a** (46% yield, over two steps). M.P = 150-152 °C.  $R_f$  = 0.5 (Hexane/EtOAc = 4/1). **IR (thin film, neat):**  $\nu_{max}/cm^{-1}$  2924, 2854, 1714, 1695, 1357, 1111, 752. **<sup>1</sup>H NMR (400 MHz, CDCl<sub>3</sub>):**  $\delta$  7.70 (d,  $J$  = 7.3 Hz, 1H), 7.61 (d,  $J$  = 7.6 Hz, 1H), 7.46 (dt,  $J$  = 7.6 and 1.1 Hz, 1H), 7.35-7.28 (m, 2H), 7.71 (d,  $J$  = 7.6 Hz, 1H), 2.67 (s, 3H), 2.35 (s, 3H). **<sup>13</sup>C NMR (100 MHz, CDCl<sub>3</sub>):**  $\delta$  206.7, 192.5, 142.5, 139.8, 139.2, 137.2, 134.7, 134.6, 132.5, 130.9, 129.4, 124.6, 124.5, 122.1, 32.3, 19.3. **HRMS (ESI):**  $m/z$  calcd for  $C_{16}H_{11}O_2$  (M-H)<sup>+</sup>: 235.0759. Found: 235.0750.

#### 4-Acetyl-3-phenyl-9H-fluoren-9-one (13b).

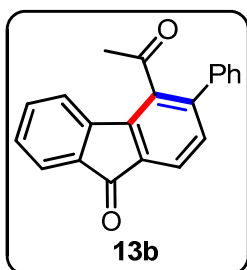

This compound was isolated as pale yellow solid. Following the general procedure-6, 25 mg of **2b** afforded 12 mg of **13b** (43% yield, over two steps). M.P = 115-117 °C.  $R_f$  = 0.5 (Hexane/EtOAc = 5/1). **IR (thin film, neat):**  $\nu_{max}/cm^{-1}$  2993, 1715, 1698, 1606, 1576, 1412, 1275, 1259, 749. **<sup>1</sup>H NMR (400 MHz, CDCl<sub>3</sub>):**  $\delta$  7.78 (d,  $J$  = 7.6 Hz, 1H), 7.73 (dd,  $J$  = 7.4 and 0.8 Hz, 1H), 7.48-7.41 (m, 7H), 7.36 (d,  $J$  = 7.6 Hz, 1H), 7.35 (dt,  $J$  = 7.6 and 1.3 Hz, 1H), 2.11 (s, 3H). **<sup>13</sup>C NMR (100 MHz, CDCl<sub>3</sub>):**  $\delta$  206.3, 192.5, 144.8, 142.8, 142.6, 139.7, 138.9, 136.5, 135.0, 134.5, 133.6, 130.7, 129.5, 128.9(2C), 128.8(2C), 128.7, 124.7, 124.5, 122.6, 32.0. **HRMS (ESI):**  $m/z$  calcd for  $C_{21}H_{13}O_2$  (M-H)<sup>+</sup>: 297.0916. Found: 297.0903.

#### 4-Acetyl-6-methoxy-3-methyl-9H-fluoren-9-one (13c).

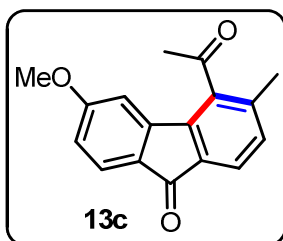

This compound was isolated as pale yellow solid. Following the general procedure-6, 30 mg of **2h** afforded 15 mg of **13c** (44% yield). M.P = 116-117 °C.  $R_f$  = 0.3 (Hexane/EtOAc = 4/1). **IR (thin film, neat):**  $\nu_{max}/cm^{-1}$  2928, 1704, 1688, 1612, 1584, 1363, 1228, 782. **<sup>1</sup>H NMR (400 MHz, CDCl<sub>3</sub>):**  $\delta$  7.67 (d,  $J$  = 8.2 Hz, 1H), 7.58 (d,  $J$  = 7.7 Hz, 1H), 7.17 (d,  $J$  = 7.7 Hz, 1H), 6.81 (d,  $J$  = 2.0 Hz, 1H), 6.77 (dd,  $J$  = 8.2 and

2.0 Hz, 1H), 3.89 (s, 3H), 2.67 (s, 3H), 2.37 (s, 3H).  $^{13}\text{C}$  NMR (100 MHz,  $\text{CDCl}_3$ ):  $\delta$  206.5, 191.1, 165.2, 144.9, 139.2, 138.0, 137.2, 133.7, 131.1, 129.6, 126.5, 124.1, 112.5, 109.7, 55.8, 32.3, 19.2. HRMS (ESI):  $m/z$  calcd for  $\text{C}_{17}\text{H}_{15}\text{O}_3$  ( $\text{M}+\text{H}$ ) $^+$ : 267.1021. Found: 267.1009.

#### 5-Acetyl-2,3-dimethoxy-6-methyl-9H-fluoren-9-one (13d).

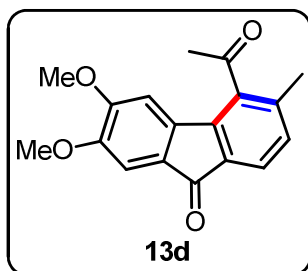

This compound was isolated as pale yellow solid. Following the general procedure-6, 35 mg of **2k** afforded 16 mg of **13d** (43% yield). M.P = 178-180 °C.  $R_f$  = 0.3 (Hexane/EtOAc = 3/1). IR (thin film, neat):  $\nu_{\text{max}}/\text{cm}^{-1}$  2926, 1704, 1681, 1609, 1480, 1276, 749.  $^1\text{H}$  NMR (400 MHz,  $\text{CDCl}_3$ ):  $\delta$  7.50 (d,  $J$  = 7.6 Hz, 1H), 7.23 (s, 1H), 7.07 (d,  $J$  = 7.6 Hz, 1H), 6.78 (s, 1H), 3.96 (s, 3H), 3.95 (s, 3H), 2.67 (s, 3H), 2.33 (s, 3H).  $^{13}\text{C}$  NMR (100 MHz,  $\text{CDCl}_3$ ):  $\delta$  206.8, 191.8, 154.2, 149.8, 139.3, 138.8, 137.4, 136.1, 133.2, 129.9, 127.7, 124.0, 107.2, 105.3, 56.29, 56.28, 32.3, 19.3. HRMS (ESI):  $m/z$  calcd for  $\text{C}_{18}\text{H}_{17}\text{O}_4$  ( $\text{M}+\text{H}$ ) $^+$ : 297.1127. Found: 297.1123.

#### 4-Acetyl-6-fluoro-3-methyl-9H-fluoren-9-one (13e).

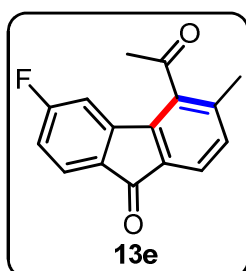

This compound was isolated as off white solid. Following the general procedure-6, 25 mg of **2g** afforded 15 mg of **13e** (50% yield). M.P = 110-112 °C.  $R_f$  = 0.3 (Hexane/EtOAc = 4/1). IR (thin film, neat):  $\nu_{\text{max}}/\text{cm}^{-1}$  2990, 1714, 1690, 1612, 1584, 1275, 1260, 750.  $^1\text{H}$  NMR (400 MHz,  $\text{CDCl}_3$ ):  $\delta$  7.70 (dd,  $J$  = 8.0 and 2.8 Hz, 1H), 7.61 (d,  $J$  = 8.0 Hz, 1H), 7.21 (7.7 Hz, 1H), 7.01-6.96 (m, 2H), 2.67 (s, 3H), 2.37 (s, 3H).  $^{13}\text{C}$  NMR (100 MHz,  $\text{CDCl}_3$ ):  $\delta$  206.1, 190.7, 165.7 (d,  $J$  = 254.1 Hz), 145.4 (d,  $J$  = 9.7 Hz), 139.9, 137.53, 137.51, 132.9, 131.6, 130.6 (d,  $J$  = 2.5 Hz), 126.5 (d,  $J$  = 10.2 Hz), 124.5, 115.8 (d,  $J$  = 23.2 Hz), 110.4 (d,  $J$  = 25.0 Hz), 32.2, 19.3.  $^{19}\text{F}$  NMR (376 MHz,  $\text{CDCl}_3$ ):  $\delta$  -101.9. HRMS (ESI):  $m/z$  calcd for  $\text{C}_{16}\text{H}_{12}\text{FO}_2$  ( $\text{M}+\text{H}$ ) $^+$ : 255.0821. Found: 255.0819.

#### 7-Acetyl-8-methyl-11H-benzo[a]fluoren-11-one (13f).

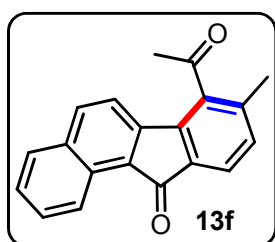

This compound was isolated as pale yellow solid. Following the general procedure-6, 40 mg of **2n** afforded 22 mg of **13f** (48% yield). M.P = 162-164 °C.  $R_f$  = 0.4 (Hexane/EtOAc = 3/1). IR (thin film, neat):  $\nu_{\text{max}}/\text{cm}^{-1}$  2935, 1702, 1692, 1604, 1581, 1280, 1060, 761.  $^1\text{H}$  NMR (400 MHz,  $\text{CDCl}_3$ ):  $\delta$  9.02 (d,  $J$  = 8.5 Hz, 1H), 7.95 ( $J$  = 8.4

Hz, 1H), 7.80 (d,  $J = 8.1$  Hz, 1H), 7.64-7.62 (m, 1H), 7.55 (d,  $J = 7.7$  Hz, 1H), 7.49-7.46 (m, 1H), 7.41 (d,  $J = 8.1$  Hz, 1H), 7.14 (d,  $J = 7.8$  Hz, 1H), 2.71 (s, 3H), 2.34 (s, 3H).  **$^{13}\text{C}$  NMR (100 MHz,  $\text{CDCl}_3$ ):**  $\delta$  206.8, 194.0, 144.3, 139.2, 138.6, 137.0, 135.8, 134.3, 132.9, 130.9, 130.2, 129.6, 128.3, 127.6, 126.8, 124.4, 123.9, 119.4, 32.6, 19.2. **HRMS (ESI):**  $m/z$  calcd for  $\text{C}_{20}\text{H}_{15}\text{O}_2$  ( $\text{M}+\text{H}$ ) $^+$ : 287.1072. Found: 287.1076.

**Crystal structure of racemic 2a (CCDC 1520613):** Structure of the racemic indanone 2a was confirmed by single crystal X-ray diffraction analysis.

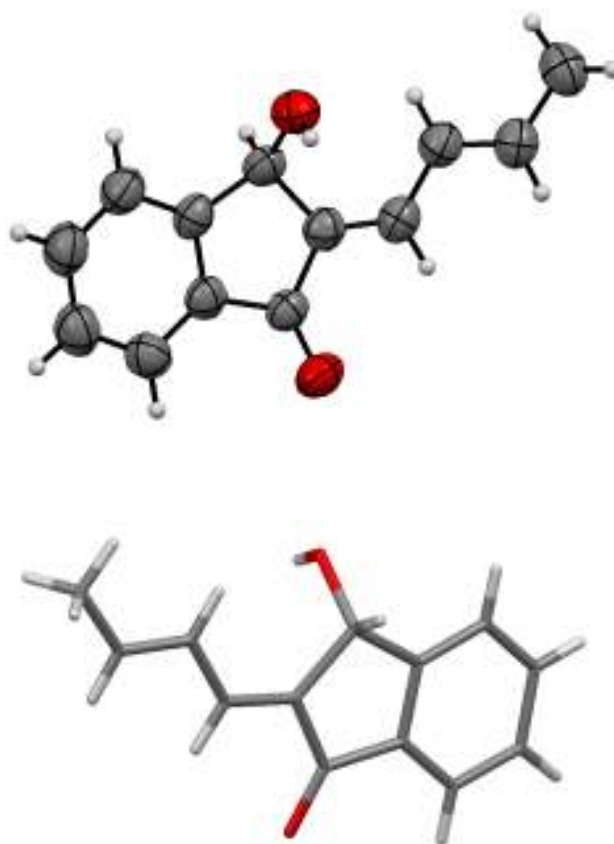

**Crystal Data** for  $C_{13}H_{12}O_2$  ( $M=200.24$  g/mol): triclinic, space group P-1 (no. 2),  $a = 7.8751(9)$  Å,  $b = 8.2320(4)$  Å,  $c = 8.8523(12)$  Å,  $\alpha = 73.986(8)^\circ$ ,  $\beta = 73.564(11)^\circ$ ,  $\gamma = 83.983(8)^\circ$ ,  $V = 528.84(10)$  Å<sup>3</sup>,  $Z = 2$ ,  $T = 298$  K,  $\mu(\text{Mo K}\alpha) = 0.084$  mm<sup>-1</sup>,  $D_{\text{calc}} = 1.2574$  g/cm<sup>3</sup>, 11929 reflections measured ( $4.96^\circ \leq 2\theta \leq 65.5^\circ$ ), 3626 unique ( $R_{\text{int}} = 0.0618$ ,  $R_{\text{sigma}} = 0.0428$ ) which were used in all calculations. The final  $R_1$  was 0.0969 ( $I \geq 2\sigma(I)$ ) and  $wR_2$  was 0.2917 (all data).

**Table 1: Crystal data and structure refinement for racemic 2a**

| Identification code | Racemic 2a        |
|---------------------|-------------------|
| Empirical formula   | $C_{13}H_{12}O_2$ |
| Formula weight      | 200.24            |
| Temperature/K       | 298               |
| Crystal system      | triclinic         |
| Space group         | P-1               |
| a/Å                 | 7.8751(9)         |
| b/Å                 | 8.2320(4)         |

|                                                |                                                                  |
|------------------------------------------------|------------------------------------------------------------------|
| c/Å                                            | 8.8523(12)                                                       |
| $\alpha/^\circ$                                | 73.986(8)                                                        |
| $\beta/^\circ$                                 | 73.564(11)                                                       |
| $\gamma/^\circ$                                | 83.983(8)                                                        |
| Volume/Å <sup>3</sup>                          | 528.84(10)                                                       |
| Z                                              | 2                                                                |
| $\rho_{\text{calc}}/\text{g}/\text{cm}^3$      | 1.2574                                                           |
| $\mu/\text{mm}^{-1}$                           | 0.084                                                            |
| F(000)                                         | 212.1                                                            |
| Crystal size/mm <sup>3</sup>                   | 0.25 × 0.2 × 0.14                                                |
| Radiation                                      | Mo K $\alpha$ ( $\lambda = 0.71073$ )                            |
| 2 $\Theta$ range for data collection/ $^\circ$ | 4.96 to 65.5                                                     |
| Index ranges                                   | -11 ≤ h ≤ 10, -11 ≤ k ≤ 12, -12 ≤ l ≤ 13                         |
| Reflections collected                          | 11929                                                            |
| Independent reflections                        | 3626 [ $R_{\text{int}} = 0.0618$ , $R_{\text{sigma}} = 0.0428$ ] |
| Data/restraints/parameters                     | 3626/0/137                                                       |
| Goodness-of-fit on F <sup>2</sup>              | 1.467                                                            |
| Final R indexes [ $I \geq 2\sigma(I)$ ]        | $R_1 = 0.0969$ , $wR_2 = 0.2396$                                 |
| Final R indexes [all data]                     | $R_1 = 0.1444$ , $wR_2 = 0.2917$                                 |
| Largest diff. peak/hole / e Å <sup>-3</sup>    | 0.72/-0.35                                                       |

**Table 2: Fractional Atomic Coordinates ( $\times 10^4$ ) and Equivalent Isotropic Displacement Parameters ( $\text{Å}^2 \times 10^3$ ) for 2a.  $U_{\text{eq}}$  is defined as 1/3 of the trace of the orthogonalised  $U_{\text{ij}}$  tensor.**

| Atom        | x          | y          | z          | U(eq)   |
|-------------|------------|------------|------------|---------|
| <b>O001</b> | 6489.9(19) | 7938.7(19) | 1949.2(16) | 67.3(5) |
| <b>O002</b> | 2431(2)    | 5482.5(18) | 6815.7(18) | 69.9(5) |
| <b>C003</b> | 5107(3)    | 7023(2)    | 6204(2)    | 53.9(5) |
| <b>C004</b> | 3686(3)    | 7263(2)    | 4112(2)    | 54.2(5) |
| <b>C005</b> | 6154(3)    | 8021(2)    | 4790(2)    | 55.4(5) |
| <b>C006</b> | 3576(2)    | 6465(2)    | 5852(2)    | 53.3(5) |
| <b>C007</b> | 5327(3)    | 8328(2)    | 3368(2)    | 56.3(5) |
| <b>C008</b> | 2483(3)    | 6998(2)    | 3406(2)    | 57.5(5) |
| <b>C009</b> | 2413(3)    | 7727(3)    | 1744(3)    | 61.1(5) |
| <b>C00A</b> | 1145(3)    | 7332(3)    | 1181(3)    | 63.2(5) |
| <b>C00B</b> | 5564(3)    | 6618(3)    | 7674(3)    | 67.3(6) |
| <b>C00C</b> | 7750(3)    | 8594(3)    | 4801(3)    | 67.7(6) |
| <b>C00D</b> | 8210(3)    | 8167(3)    | 6260(3)    | 76.5(7) |
| <b>C00E</b> | 7123(4)    | 7225(3)    | 7685(3)    | 76.0(7) |
| <b>C00F</b> | 952(3)     | 8043(4)    | -500(3)    | 76.7(7) |

**Table 3: Anisotropic Displacement Parameters ( $\text{Å}^2 \times 10^3$ ) for bsme. The Anisotropic displacement factor exponent takes the form:  $-2\pi^2[h^2a^{*2}U_{11}+2hka^*b^*U_{12}+\dots]$ .**

| Atom | $U_{11}$ | $U_{22}$ | $U_{33}$ | $U_{12}$ | $U_{13}$ | $U_{23}$ |
|------|----------|----------|----------|----------|----------|----------|
| O001 | 67.6(9)  | 67.5(10) | 61.0(9)  | -9.4(7)  | -10.6(7) | -11.3(7) |

|      |          |          |          |           |           |           |
|------|----------|----------|----------|-----------|-----------|-----------|
| O002 | 70.5(10) | 59.5(9)  | 73.3(10) | -16.9(7)  | -9.7(7)   | -10.9(7)  |
| C003 | 60.7(10) | 43.3(9)  | 59.9(10) | -1.0(7)   | -18.8(8)  | -14.1(8)  |
| C004 | 57.6(10) | 47.8(9)  | 58.6(10) | -0.2(8)   | -16.6(8)  | -15.1(8)  |
| C005 | 57.3(10) | 45.2(9)  | 65.8(11) | -3.6(8)   | -17.5(9)  | -15.7(8)  |
| C006 | 56.4(10) | 44.8(9)  | 58.7(11) | -4.0(7)   | -13.7(8)  | -14.0(8)  |
| C007 | 62.7(11) | 45.6(9)  | 58.9(11) | -9.5(8)   | -17.2(9)  | -6.9(8)   |
| C008 | 55.2(10) | 52.8(10) | 66.0(12) | -5.3(8)   | -15.7(9)  | -16.9(9)  |
| C009 | 58.8(11) | 59.5(11) | 66.7(12) | -5.4(8)   | -18.4(9)  | -15.9(9)  |
| C00A | 60.7(11) | 63.3(12) | 70.8(13) | -2.3(9)   | -21.0(9)  | -21.7(10) |
| C00B | 80.2(14) | 60.9(12) | 61.9(12) | -1.1(10)  | -24.7(11) | -12.0(9)  |
| C00C | 65.6(12) | 62.1(12) | 76.3(14) | -11.8(10) | -20.1(10) | -14.5(10) |
| C00D | 74.2(14) | 76.3(15) | 89.5(16) | -8.8(11)  | -35.0(12) | -22.3(12) |
| C00E | 85.8(16) | 72.6(15) | 80.7(15) | -0.8(12)  | -40.6(13) | -19.2(12) |
| C00F | 76.2(15) | 89.0(17) | 74.2(14) | 0.9(12)   | -29.4(12) | -27.5(12) |

**Table 4: Bond Lengths for racemic 2a.**

| Atom        | Atom | Length/Å | Atom | Atom | Length/Å |
|-------------|------|----------|------|------|----------|
| <b>O001</b> | C007 | 1.425(3) | C005 | C007 | 1.525(3) |
| <b>O002</b> | C006 | 1.238(2) | C005 | C00C | 1.391(3) |
| <b>C003</b> | C005 | 1.383(3) | C008 | C009 | 1.442(3) |
| <b>C003</b> | C006 | 1.472(3) | C009 | C00A | 1.338(3) |
| <b>C003</b> | C00B | 1.390(3) | C00A | C00F | 1.486(3) |
| <b>C004</b> | C006 | 1.480(3) | C00B | C00E | 1.377(3) |
| <b>C004</b> | C007 | 1.520(3) | C00C | C00D | 1.382(3) |
| <b>C004</b> | C008 | 1.337(3) | C00D | C00E | 1.383(4) |

**Table 5: Bond Angles for racemic 2a.**

| Atom        | Atom | Atom | Angle/°    | Atom | Atom | Atom | Angle/°    |
|-------------|------|------|------------|------|------|------|------------|
| <b>C006</b> | C003 | C005 | 109.58(17) | C004 | C006 | C003 | 107.19(16) |
| <b>C00B</b> | C003 | C005 | 121.9(2)   | C004 | C007 | O001 | 114.40(16) |
| <b>C00B</b> | C003 | C006 | 128.44(19) | C005 | C007 | O001 | 113.86(16) |
| <b>C007</b> | C004 | C006 | 108.84(16) | C005 | C007 | C004 | 102.62(15) |
| <b>C008</b> | C004 | C006 | 121.95(18) | C009 | C008 | C004 | 127.4(2)   |
| <b>C008</b> | C004 | C007 | 129.21(18) | C00A | C009 | C008 | 121.4(2)   |
| <b>C007</b> | C005 | C003 | 111.61(17) | C00F | C00A | C009 | 125.1(2)   |
| <b>C00C</b> | C005 | C003 | 119.8(2)   | C00E | C00B | C003 | 117.9(2)   |
| <b>C00C</b> | C005 | C007 | 128.54(18) | C00D | C00C | C005 | 117.9(2)   |
| <b>C003</b> | C006 | O002 | 126.68(17) | C00E | C00D | C00C | 122.0(2)   |
| <b>C004</b> | C006 | O002 | 126.10(18) | C00D | C00E | C00B | 120.4(2)   |

**Table 6: Hydrogen Atom Coordinates (Å×10<sup>4</sup>) and Isotropic Displacement Parameters (Å<sup>2</sup>×10<sup>3</sup>) for racemic 2a.**

| Atom        | x       | y       | z       | U(eq)   |
|-------------|---------|---------|---------|---------|
| <b>H00C</b> | 8485(3) | 9243(3) | 3855(3) | 81.2(7) |



|             |          |          |           |           |
|-------------|----------|----------|-----------|-----------|
| <b>H00D</b> | 9281(3)  | 8525(3)  | 6285(3)   | 91.8(8)   |
| <b>H00E</b> | 7447(4)  | 7000(3)  | 8656(3)   | 91.2(8)   |
| <b>H00B</b> | 4840(3)  | 5958(3)  | 8619(3)   | 80.8(7)   |
| <b>H001</b> | 6820(30) | 6942(11) | 2172(10)  | 100.9(7)  |
| <b>H007</b> | 4951(3)  | 9521(2)  | 3084(2)   | 67.5(6)   |
| <b>H008</b> | 1591(3)  | 6259(2)  | 4062(2)   | 69.0(6)   |
| <b>H009</b> | 3266(3)  | 8489(3)  | 1050(3)   | 73.3(6)   |
| <b>H00A</b> | 320(3)   | 6553(3)  | 1897(3)   | 75.9(7)   |
| <b>H00f</b> | 1895(17) | 8800(20) | -1124(8)  | 115.1(10) |
| <b>H00g</b> | 1000(30) | 7141(4)  | -1006(10) | 115.1(10) |
| <b>H00h</b> | -165(13) | 8650(20) | -456(3)   | 115.1(10) |

**Crystal structure of chiral 2j (CCDC 1520308):** Structure of the chiral indanone **2j** was confirmed by single crystal X-ray diffraction analysis. Absolute stereochemistry was realised to be (*S*).

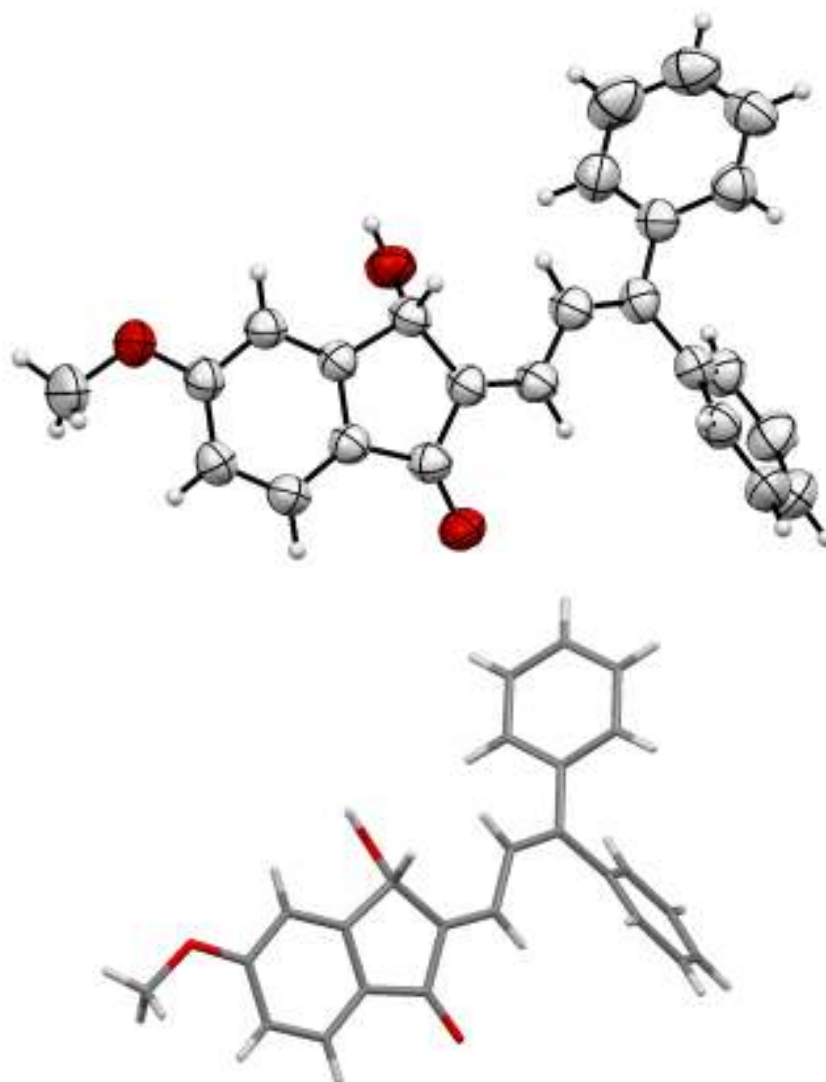

**Crystal Data** for  $C_{25}H_{20}O_3$  ( $M = 368.42$  g/mol): orthorhombic, space group  $P2_12_12_1$  (no. 19),  $a = 10.1899(4)$  Å,  $b = 13.3377(5)$  Å,  $c = 14.4940(7)$  Å,  $V = 1969.88(14)$  Å<sup>3</sup>,  $Z = 8$ ,  $T = 298$  K,  $\mu(\text{Mo K}\alpha) = 0.081$  mm<sup>-1</sup>,  $D_{\text{calc}} = 1.2422$  g/cm<sup>3</sup>, 15325 reflections measured ( $5.62^\circ \leq 2\theta \leq 65.52^\circ$ ), 6671 unique ( $R_{\text{int}} = 0.0263$ ,  $R_{\text{sigma}} = 0.0399$ ) which were used in all calculations. The final  $R_1$  was 0.0593 ( $I \geq 2u(I)$ ) and  $wR_2$  was 0.1979 (all data).

**Table 1: Crystal data and structure refinement for Chiral 2j**

| Identification code | Chiral 2j         |
|---------------------|-------------------|
| Empirical formula   | $C_{25}H_{20}O_3$ |
| Formula weight      | 368.42            |
| Temperature/K       | 298               |

|                                             |                                                               |
|---------------------------------------------|---------------------------------------------------------------|
| Crystal system                              | orthorhombic                                                  |
| Space group                                 | P2 <sub>1</sub> 2 <sub>1</sub> 2 <sub>1</sub>                 |
| a/Å                                         | 10.1899(4)                                                    |
| b/Å                                         | 13.3377(5)                                                    |
| c/Å                                         | 14.4940(7)                                                    |
| $\alpha$ /°                                 | 90                                                            |
| $\beta$ /°                                  | 90                                                            |
| $\gamma$ /°                                 | 90                                                            |
| Volume/Å <sup>3</sup>                       | 1969.88(14)                                                   |
| Z                                           | 8                                                             |
| $\rho_{\text{calc}}$ /cm <sup>3</sup>       | 1.2422                                                        |
| $\mu$ /mm <sup>-1</sup>                     | 0.081                                                         |
| F(000)                                      | 776.4                                                         |
| Crystal size/mm <sup>3</sup>                | 0.2 × 0.15 × 0.12                                             |
| Radiation                                   | Mo K $\alpha$ ( $\lambda$ = 0.71073)                          |
| 2 $\Theta$ range for data collection/°      | 5.62 to 65.52                                                 |
| Index ranges                                | -14 ≤ h ≤ 14, -16 ≤ k ≤ 19, -15 ≤ l ≤ 21                      |
| Reflections collected                       | 15325                                                         |
| Independent reflections                     | 6671 [R <sub>int</sub> = 0.0263, R <sub>sigma</sub> = 0.0399] |
| Data/restraints/parameters                  | 6671/0/254                                                    |
| Goodness-of-fit on F <sup>2</sup>           | 1.053                                                         |
| Final R indexes [I ≥ 2 $\sigma$ (I)]        | R <sub>1</sub> = 0.0593, wR <sub>2</sub> = 0.1576             |
| Final R indexes [all data]                  | R <sub>1</sub> = 0.1099, wR <sub>2</sub> = 0.1979             |
| Largest diff. peak/hole / e Å <sup>-3</sup> | 0.28/-0.20                                                    |
| Flack parameter                             | -0.6(9)                                                       |

**Table 2: Fractional Atomic Coordinates ( $\times 10^4$ ) and Equivalent Isotropic Displacement Parameters ( $\text{\AA}^2 \times 10^3$ ) for BS06OMediph.  $U_{\text{eq}}$  is defined as 1/3 of the trace of the orthogonalised  $U_{ij}$  tensor.**

| Atom | x            | y            | z            | U(eq)    |
|------|--------------|--------------|--------------|----------|
| O001 | -5270.0 (17) | -9422.2 (12) | -3131.7 (14) | 71.4 (5) |
| O002 | -6061.1 (16) | -6272.1 (12) | -1904.2 (13) | 71.0 (5) |
| O003 | -1220.6 (18) | -6755.7 (13) | -683.1 (14)  | 76.9 (5) |
| C004 | -4027.7 (18) | -7214.5 (15) | -2114.1 (14) | 48.2 (4) |
| C005 | -3937.0 (19) | -8244.4 (14) | -2271.1 (14) | 49.6 (4) |
| C006 | -3090 (2)    | -6727.5 (16) | -1593.1 (15) | 54.8 (5) |
| C007 | -5060 (2)    | -8576.9 (15) | -2825.9 (14) | 53.5 (5) |
| C008 | -5915.0 (19) | -7689.5 (15) | -2962.4 (15) | 52.1 (5) |
| C009 | -9242 (2)    | -6956.4 (17) | -3781.7 (15) | 53.6 (5) |
| C00A | -10059 (2)   | -6043.4 (16) | -3685.7 (15) | 54.3 (5) |
| C00B | -2075 (2)    | -7279.5 (17) | -1207.6 (15) | 56.2 (5) |
| C00C | -1981 (2)    | -8312.5 (17) | -1365.4 (17) | 59.7 (5) |
| C00D | -5244 (2)    | -6771.3 (15) | -2551.7 (16) | 52.4 (5) |
| C00E | -7104 (2)    | -7759.1 (16) | -3355.1 (16) | 56.8 (5) |
| C00F | -9878 (2)    | -7846.6 (16) | -4197.6 (14) | 53.4 (5) |

|             |            |              |              |            |
|-------------|------------|--------------|--------------|------------|
| <b>C00G</b> | -2902 (2)  | -8791.1 (16) | -1902.4 (16) | 58.2 (5)   |
| <b>C00H</b> | -8009 (2)  | -6933.9 (17) | -3437.9 (17) | 59.1 (5)   |
| <b>C00I</b> | -11174 (2) | -8073.9 (18) | -3941.7 (17) | 62.2 (6)   |
| <b>C00J</b> | -10774 (2) | -5667.7 (19) | -4416.8 (17) | 65.1 (6)   |
| <b>C00K</b> | -9248 (2)  | -8475.2 (18) | -4820.5 (16) | 63.1 (6)   |
| <b>C00L</b> | -11550 (3) | -4821 (2)    | -4311 (2)    | 77.3 (7)   |
| <b>C00M</b> | -11789 (3) | -8921 (2)    | -4278.6 (19) | 75.2 (7)   |
| <b>C00N</b> | -10133 (3) | -5542 (2)    | -2833.3 (18) | 69.6 (6)   |
| <b>C00O</b> | -11623 (3) | -4351 (2)    | -3471 (2)    | 84.8 (8)   |
| <b>C00P</b> | -11132 (3) | -9551 (2)    | -4873 (2)    | 83.2 (8)   |
| <b>C00Q</b> | -9876 (3)  | -9326 (2)    | -5141.5 (19) | 76.0 (7)   |
| <b>C00R</b> | -10912 (3) | -4709 (2)    | -2748 (2)    | 87.7 (9)   |
| <b>C00S</b> | -208 (4)   | -7278 (2)    | -209 (3)     | 111.3 (13) |

**Table 3: Anisotropic Displacement Parameters ( $\text{\AA}^2 \times 10^3$ ) for BS06OMediph. The Anisotropic displacement factor exponent takes the form:  $-2\pi^2[h^2a^{*2}U_{11}+2hka^*b^*U_{12}+\dots]$ .**

| Atom        | $U_{11}$  | $U_{22}$  | $U_{33}$  | $U_{12}$   | $U_{13}$   | $U_{23}$   |
|-------------|-----------|-----------|-----------|------------|------------|------------|
| <b>O001</b> | 66.9 (9)  | 52.5 (8)  | 94.9 (12) | -3.0 (7)   | -19.3 (9)  | -8.7 (8)   |
| <b>O002</b> | 58.1 (8)  | 59.1 (9)  | 95.7 (12) | 9.7 (8)    | -7.5 (9)   | -14.5 (9)  |
| <b>O003</b> | 73.6 (11) | 65.1 (10) | 92.0 (12) | 2.7 (9)    | -34.5 (10) | -8.5 (9)   |
| <b>C004</b> | 44.1 (9)  | 48.6 (9)  | 51.9 (10) | -1.5 (8)   | -0.7 (9)   | 3.9 (8)    |
| <b>C005</b> | 46.9 (9)  | 47.5 (9)  | 54.4 (11) | -1.6 (8)   | -0.5 (9)   | 2.1 (8)    |
| <b>C006</b> | 54 (1)    | 46.4 (10) | 64.1 (12) | -0.6 (9)   | -5.5 (10)  | 1.2 (9)    |
| <b>C007</b> | 53.8 (10) | 48.4 (10) | 58.2 (11) | -1.8 (9)   | 0.9 (10)   | 0.8 (9)    |
| <b>C008</b> | 44.9 (9)  | 50.7 (10) | 60.7 (12) | -3.4 (8)   | -3.4 (9)   | 4.5 (9)    |
| <b>C009</b> | 46.6 (9)  | 60.2 (12) | 54.1 (11) | -3.3 (9)   | -0.4 (9)   | 4.5 (9)    |
| <b>C00A</b> | 46.7 (9)  | 52.6 (10) | 63.6 (12) | -0.8 (9)   | -0.3 (9)   | 0.1 (10)   |
| <b>C00B</b> | 49.7 (10) | 58.6 (12) | 60.3 (12) | -1.2 (10)  | -8.2 (10)  | 1.9 (10)   |
| <b>C00C</b> | 54.5 (11) | 58.6 (12) | 66.0 (13) | 6.2 (10)   | -10.5 (11) | 1.4 (10)   |
| <b>C00D</b> | 48.1 (9)  | 45.1 (9)  | 63.9 (12) | -1.2 (8)   | -5.5 (10)  | 7.2 (9)    |
| <b>C00E</b> | 50.1 (10) | 50.9 (11) | 69.3 (13) | -4.3 (9)   | -3.4 (10)  | 3.5 (10)   |
| <b>C00F</b> | 49.9 (10) | 57.1 (11) | 53.4 (10) | 3.1 (9)    | -4.2 (9)   | 2.7 (9)    |
| <b>C00G</b> | 59.5 (11) | 48.4 (10) | 66.7 (13) | 5.4 (9)    | -5.4 (11)  | -0.4 (10)  |
| <b>C00H</b> | 50.3 (10) | 54.9 (11) | 72.1 (13) | -3.9 (9)   | -3.9 (11)  | 2.9 (10)   |
| <b>C00I</b> | 55.3 (11) | 64.0 (12) | 67.2 (13) | -2 (1)     | -1.2 (11)  | -3.4 (11)  |
| <b>C00J</b> | 60.4 (12) | 69.7 (14) | 65.1 (14) | 0.9 (11)   | -3.5 (11)  | -2.1 (11)  |
| <b>C00K</b> | 61.0 (12) | 68.5 (14) | 59.8 (13) | 11.9 (11)  | -2.9 (11)  | -3.1 (11)  |
| <b>C00L</b> | 64.7 (14) | 68.0 (14) | 99 (2)    | 9.0 (12)   | -4.4 (14)  | 13.1 (15)  |
| <b>C00M</b> | 67.7 (15) | 73.0 (15) | 84.8 (16) | -15.6 (13) | -5.0 (14)  | -4.7 (14)  |
| <b>C00N</b> | 64.6 (13) | 79.4 (15) | 64.7 (13) | 2.7 (12)   | -5.8 (12)  | -9.2 (12)  |
| <b>C00O</b> | 63.2 (14) | 72.7 (16) | 118 (2)   | 8.8 (13)   | 6.8 (16)   | -12.2 (17) |
| <b>C00P</b> | 90 (2)    | 68.7 (15) | 90.4 (19) | -6.3 (15)  | -24.4 (17) | -9.3 (14)  |
| <b>C00Q</b> | 92.3 (19) | 69.1 (14) | 66.7 (14) | 17.0 (14)  | -15.7 (14) | -14.3 (12) |

|             |           |           |         |          |          |            |
|-------------|-----------|-----------|---------|----------|----------|------------|
| <b>C00R</b> | 73.3 (16) | 90.7 (19) | 99 (2)  | 6.7 (15) | 7.1 (17) | -34.0 (17) |
| <b>C00S</b> | 106 (2)   | 89 (2)    | 139 (3) | 8 (2)    | -74 (2)  | -10 (2)    |

**Table 4: Bond Lengths for chiral 2j**

| Atom        | Atom | Length/Å  | Atom        | Atom | Length/Å  |
|-------------|------|-----------|-------------|------|-----------|
| <b>O001</b> | C007 | 1.230 (3) | <b>C00A</b> | C00J | 1.380 (3) |
| <b>O002</b> | C00D | 1.420 (3) | <b>C00A</b> | C00N | 1.407 (3) |
| <b>O003</b> | C00B | 1.351 (3) | <b>C00B</b> | C00C | 1.400 (3) |
| <b>O003</b> | C00S | 1.422 (3) | <b>C00C</b> | C00G | 1.376 (3) |
| <b>C004</b> | C005 | 1.395 (3) | <b>C00E</b> | C00H | 1.441 (3) |
| <b>C004</b> | C006 | 1.380 (3) | <b>C00F</b> | C00I | 1.405 (3) |
| <b>C004</b> | C00D | 1.512 (3) | <b>C00F</b> | C00K | 1.389 (3) |
| <b>C005</b> | C007 | 1.467 (3) | <b>C00I</b> | C00M | 1.381 (3) |
| <b>C005</b> | C00G | 1.389 (3) | <b>C00J</b> | C00L | 1.387 (4) |
| <b>C006</b> | C00B | 1.387 (3) | <b>C00K</b> | C00Q | 1.383 (3) |
| <b>C007</b> | C008 | 1.483 (3) | <b>C00L</b> | C00O | 1.371 (4) |
| <b>C008</b> | C00D | 1.524 (3) | <b>C00M</b> | C00P | 1.377 (4) |
| <b>C008</b> | C00E | 1.342 (3) | <b>C00N</b> | C00R | 1.370 (4) |
| <b>C009</b> | C00A | 1.482 (3) | <b>C00O</b> | C00R | 1.361 (4) |
| <b>C009</b> | C00F | 1.481 (3) | <b>C00P</b> | C00Q | 1.371 (5) |
| <b>C009</b> | C00H | 1.351 (3) |             |      |           |

**Table 5: Bond Angles for chiral 2j**

| Atom        | Atom | Atom | Angle/°     | Atom        | Atom | Atom | Angle/°     |
|-------------|------|------|-------------|-------------|------|------|-------------|
| <b>C00S</b> | O003 | C00B | 119.1 (2)   | <b>C00C</b> | C00B | C006 | 120.5 (2)   |
| <b>C006</b> | C004 | C005 | 120.44 (18) | <b>C00G</b> | C00C | C00B | 120.1 (2)   |
| <b>C00D</b> | C004 | C005 | 111.76 (17) | <b>C004</b> | C00D | O002 | 112.74 (18) |
| <b>C00D</b> | C004 | C006 | 127.78 (18) | <b>C008</b> | C00D | O002 | 111.82 (16) |
| <b>C007</b> | C005 | C004 | 109.59 (18) | <b>C008</b> | C00D | C004 | 102.56 (15) |
| <b>C00G</b> | C005 | C004 | 120.28 (19) | <b>C00H</b> | C00E | C008 | 124.1 (2)   |
| <b>C00G</b> | C005 | C007 | 130.11 (19) | <b>C00I</b> | C00F | C009 | 118.5 (2)   |
| <b>C00B</b> | C006 | C004 | 119.13 (19) | <b>C00K</b> | C00F | C009 | 123.12 (19) |
| <b>C005</b> | C007 | O001 | 127.6 (2)   | <b>C00K</b> | C00F | C00I | 118.4 (2)   |
| <b>C008</b> | C007 | O001 | 125.51 (19) | <b>C00C</b> | C00G | C005 | 119.47 (19) |
| <b>C008</b> | C007 | C005 | 106.87 (17) | <b>C00E</b> | C00H | C009 | 127.5 (2)   |
| <b>C00D</b> | C008 | C007 | 109.00 (16) | <b>C00M</b> | C00I | C00F | 120.7 (2)   |
| <b>C00E</b> | C008 | C007 | 122.1 (2)   | <b>C00L</b> | C00J | C00A | 120.8 (2)   |
| <b>C00E</b> | C008 | C00D | 128.80 (19) | <b>C00Q</b> | C00K | C00F | 120.0 (2)   |
| <b>C00F</b> | C009 | C00A | 116.80 (17) | <b>C00O</b> | C00L | C00J | 120.1 (3)   |
| <b>C00H</b> | C009 | C00A | 118.0 (2)   | <b>C00P</b> | C00M | C00I | 120.0 (3)   |
| <b>C00H</b> | C009 | C00F | 125.1 (2)   | <b>C00R</b> | C00N | C00A | 119.7 (3)   |
| <b>C00J</b> | C00A | C009 | 121.5 (2)   | <b>C00R</b> | C00O | C00L | 119.6 (3)   |
| <b>C00N</b> | C00A | C009 | 120.2 (2)   | <b>C00Q</b> | C00P | C00M | 119.9 (3)   |
| <b>C00N</b> | C00A | C00J | 118.2 (2)   | <b>C00P</b> | C00Q | C00K | 121.0 (3)   |
| <b>C006</b> | C00B | O003 | 115.7 (2)   | <b>C00O</b> | C00R | C00N | 121.5 (3)   |

|      |      |      |           |
|------|------|------|-----------|
| C00C | C00B | O003 | 123.8 (2) |
|------|------|------|-----------|

**Table 6: Hydrogen Atom Coordinates ( $\text{\AA}\times 10^4$ ) and Isotropic Displacement Parameters ( $\text{\AA}^2\times 10^3$ ) for chiral 2j**

| Atom | <i>x</i>   | <i>y</i>     | <i>z</i>     | U(eq)      |
|------|------------|--------------|--------------|------------|
| H002 | -5770 (20) | -5708 (10)   | -1810 (20)   | 106.4 (7)  |
| H006 | -3139 (2)  | -6038.4 (16) | -1501.7 (15) | 65.8 (6)   |
| H00C | -1294 (2)  | -8676.0 (17) | -1106.9 (17) | 71.6 (6)   |
| H00D | -4993 (2)  | -6307.3 (15) | -3045.4 (16) | 62.8 (6)   |
| H00E | -7359 (2)  | -8378.5 (16) | -3588.6 (16) | 68.1 (6)   |
| H00G | -2832 (2)  | -9474.9 (16) | -2017.5 (16) | 69.8 (6)   |
| H00H | -7711 (2)  | -6314.5 (17) | -3230.7 (17) | 70.9 (6)   |
| H00I | -11623 (2) | -7649.9 (18) | -3541.5 (17) | 74.6 (7)   |
| H00J | -10735 (2) | -5985.8 (19) | -4987.1 (17) | 78.1 (7)   |
| H00K | -8405 (2)  | -8323.9 (18) | -5021.8 (16) | 75.7 (7)   |
| H00L | -12022 (3) | -4572 (2)    | -4810 (2)    | 92.7 (9)   |
| H00M | -12647 (3) | -9065 (2)    | -4104.5 (19) | 90.2 (8)   |
| H00N | -9656 (3)  | -5774 (2)    | -2330.0 (18) | 83.5 (7)   |
| H00O | -12155 (3) | -3791 (2)    | -3396 (2)    | 101.7 (10) |
| H00P | -11539 (3) | -10128 (2)   | -5091 (2)    | 99.8 (10)  |
| H00Q | -9439 (3)  | -9752 (2)    | -5546.1 (19) | 91.2 (9)   |
| H00R | -10955 (3) | -4382 (2)    | -2182 (2)    | 105.2 (10) |
| H00a | 399 (17)   | -7550 (20)   | -648 (3)     | 167 (2)    |
| H00b | 240 (20)   | -6823 (6)    | 194 (17)     | 167 (2)    |
| H00f | -585 (4)   | -7811 (16)   | 148 (18)     | 167 (2)    |

## Efforts to gain evidence for 1,4- vs 1,6-addition of phosphines

In an attempt to prove 1,4- vs 1,6-addition of phosphine, we planned to synthesize the substrate **1b**, where the two double bonds (of the dienone moiety) are disposed *E* and *Z*, Scheme 1. In case of a 1,4-addition of phosphine (path a), the stereochemical integrity of the *Z*-configured double bond should remain unchanged, leading to the formation of *E,Z*-**2b**. But in case of a 1,6-addition (path b), the stereochemical information at the *Z*-configured double bond (of **1b**) should be lost and thus should lead to a thermodynamically preferred *E,E*-**2b**, Scheme 1.

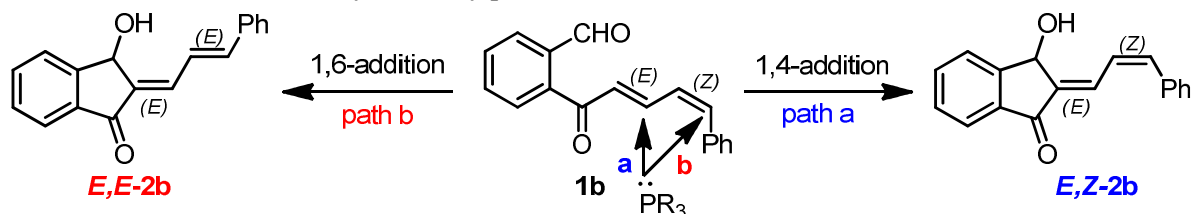

Scheme 1

Accordingly, we have designed a synthetic route to access the *E,Z*-**1b** as in Scheme 2. The required *E,Z*-aldehyde **A** was obtained from phenylpropargyl aldehyde **A1** via Wittig-Horner reaction, hydrogenation of **A2** using Lindlar's catalyst, DIBAL-H reduction of the ester **A3**, and IBX oxidation sequence.

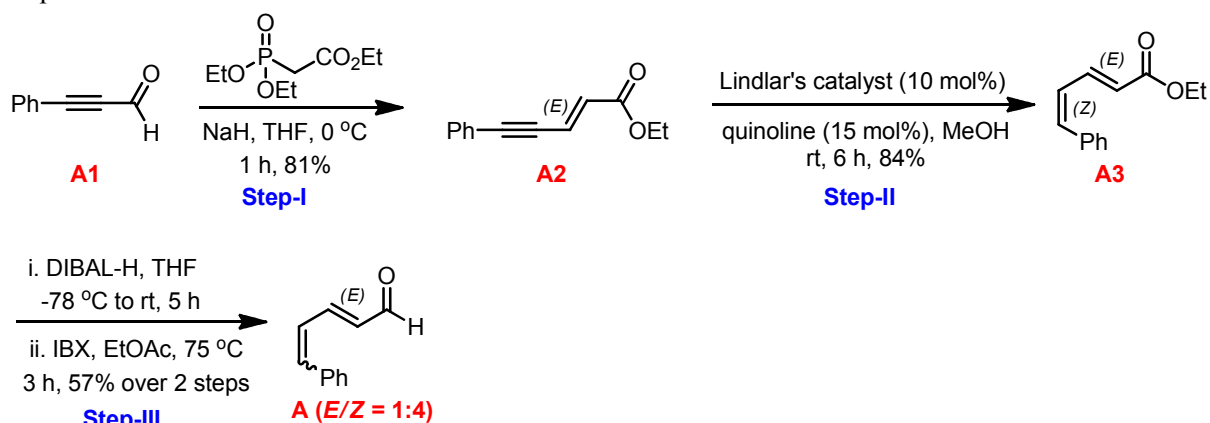

Scheme 2

SpinWorks 4: bs 07 260

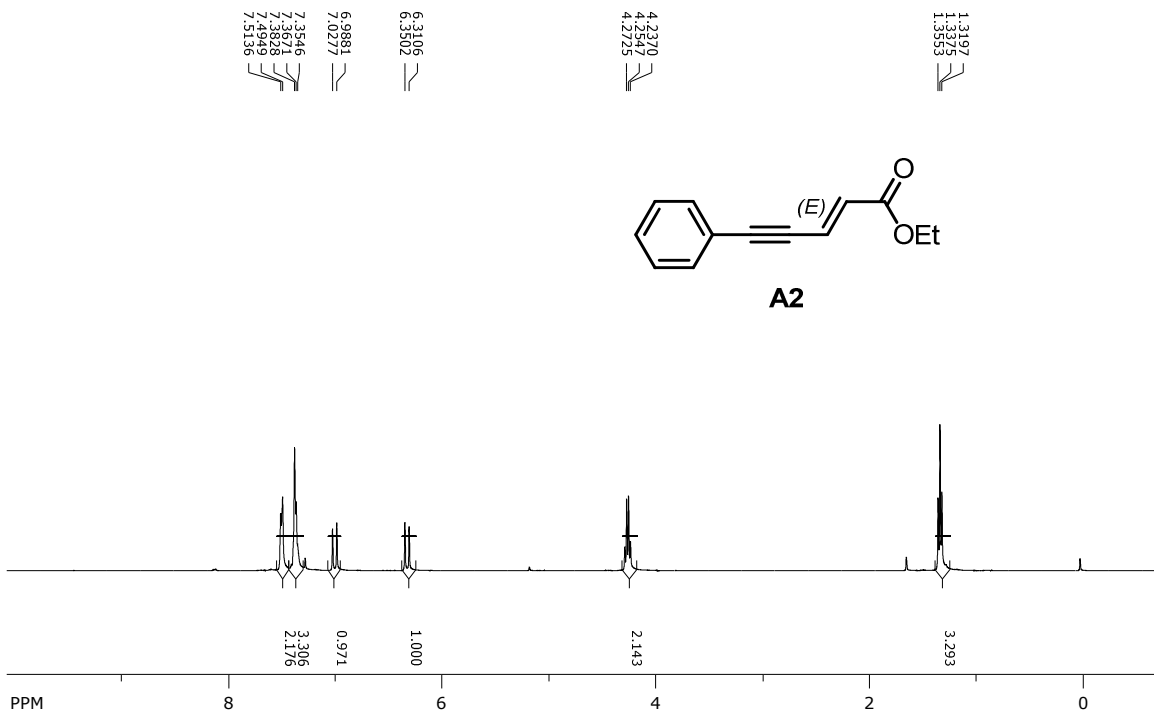

SpinWorks 4: BS-07-262

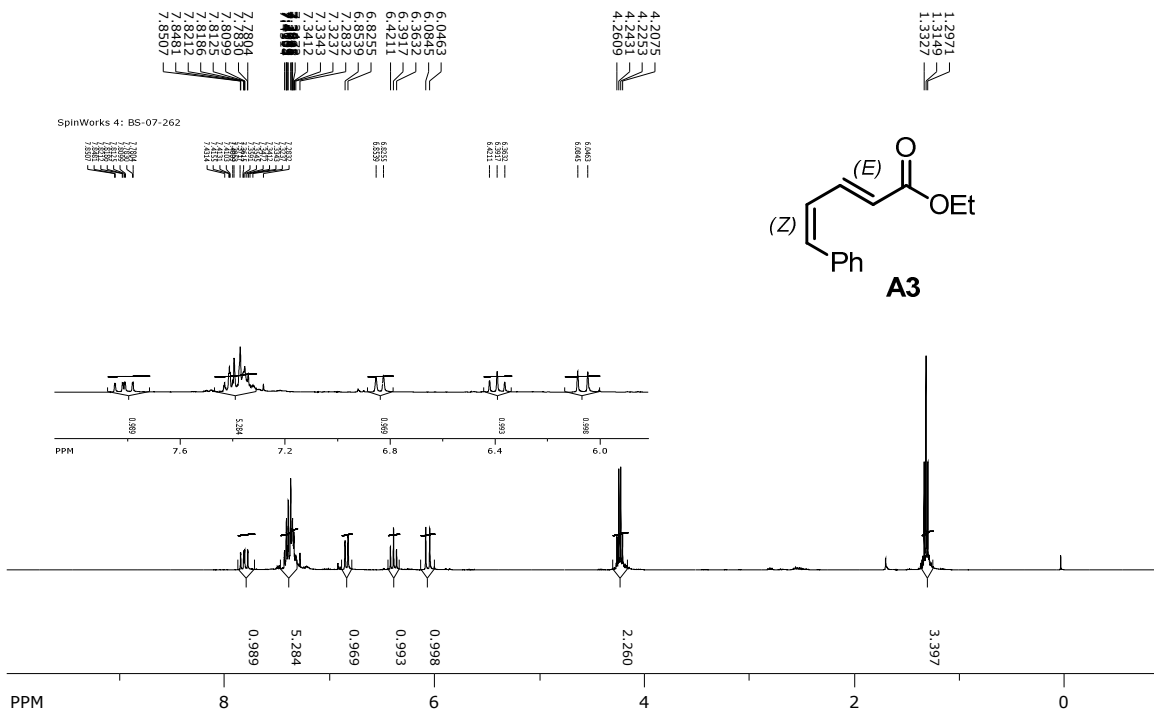



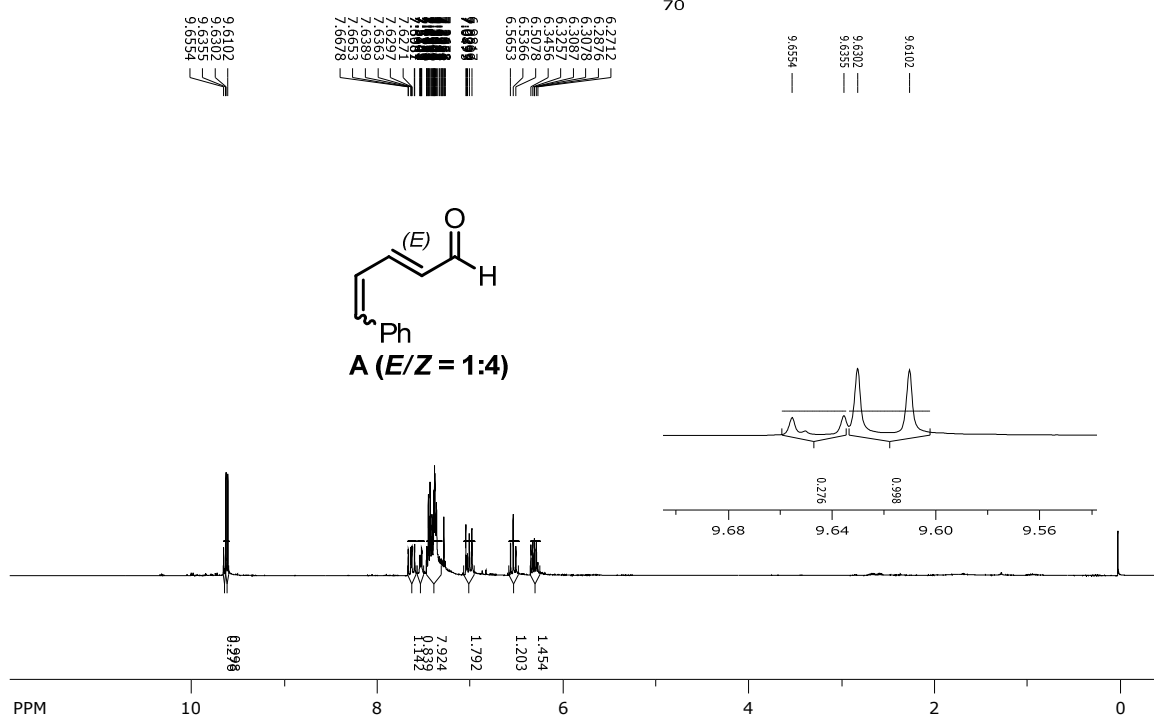

Further, *n*-butyllithium mediated alkylation, IBX oxidation, and acetal deprotection furnished the desired dienone **D** in 1:4 *E/Z* ratio (Scheme 3). IMBH reaction of **D** under the optimized conditions generated the indanone **E**. However, at this stage we were unable to extract the stereochemical information across the double bonds (see the  $^1\text{H-NMR}$  of **E**). Thus, the indanone **E** was oxidized using tetrapropylammonium perruthenate (TPAP) to indanedione **F**.  $^1\text{H-NMR}$  of indanedione **F** clearly indicated the presence of *E*-configured double bond. The data of **F** was also verified with the literature report.<sup>3</sup>

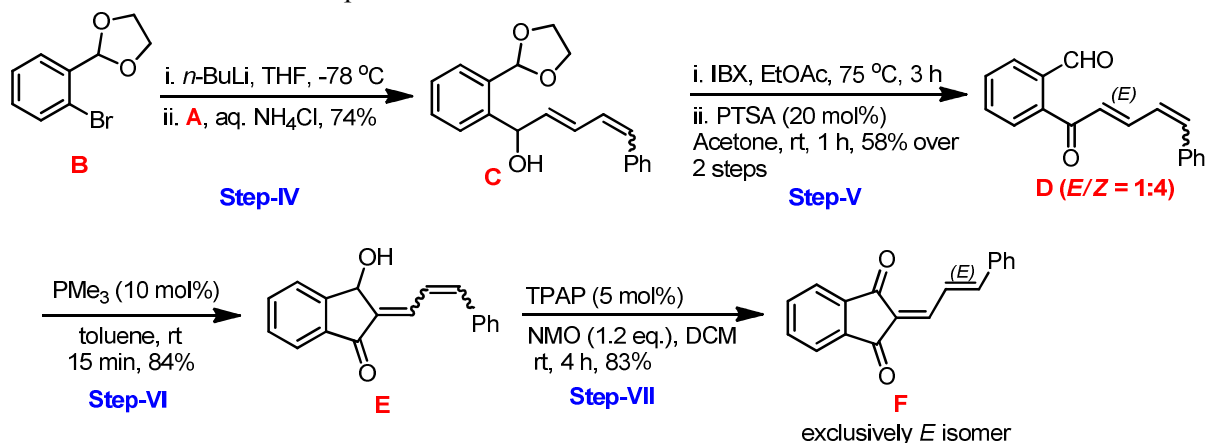

Scheme 3

<sup>3</sup> F. J. Chang, R. Gurubrahamam and K. Chen, *Adv. Synth. Catal.*, 2017, **359**, 1277.

SpinWorks 4: bs-07-275-mix

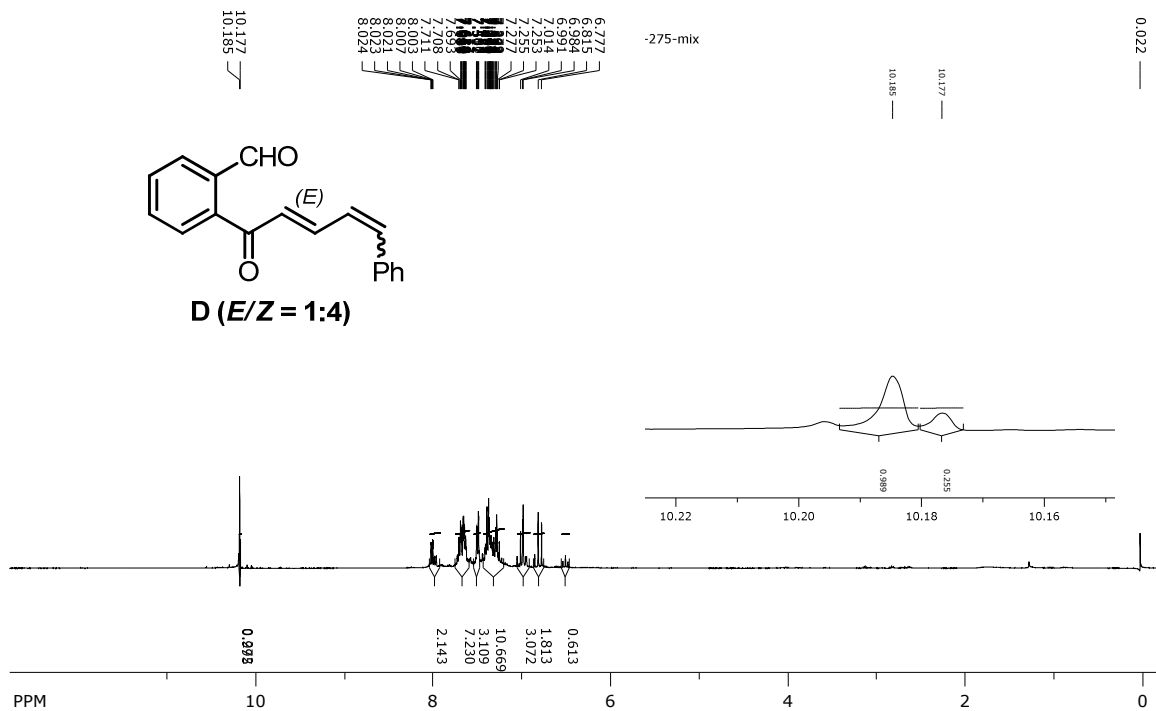

SpinWorks 4: bs-07-284

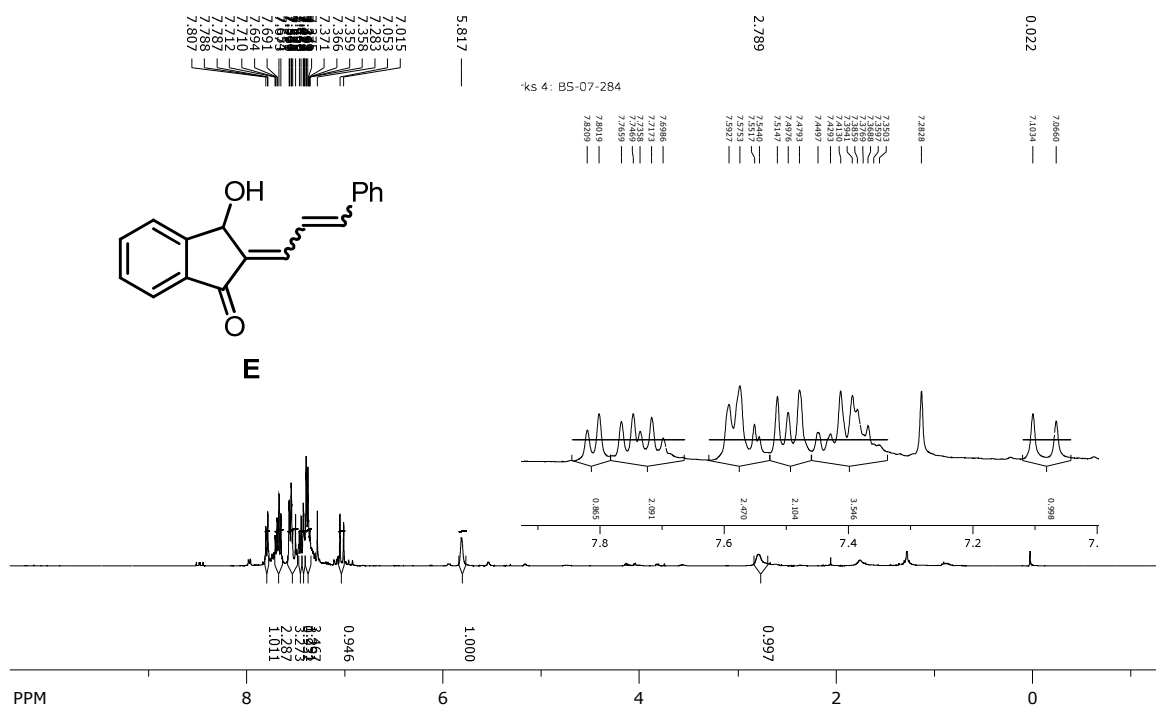

SpinWorks 4: BS-07-296

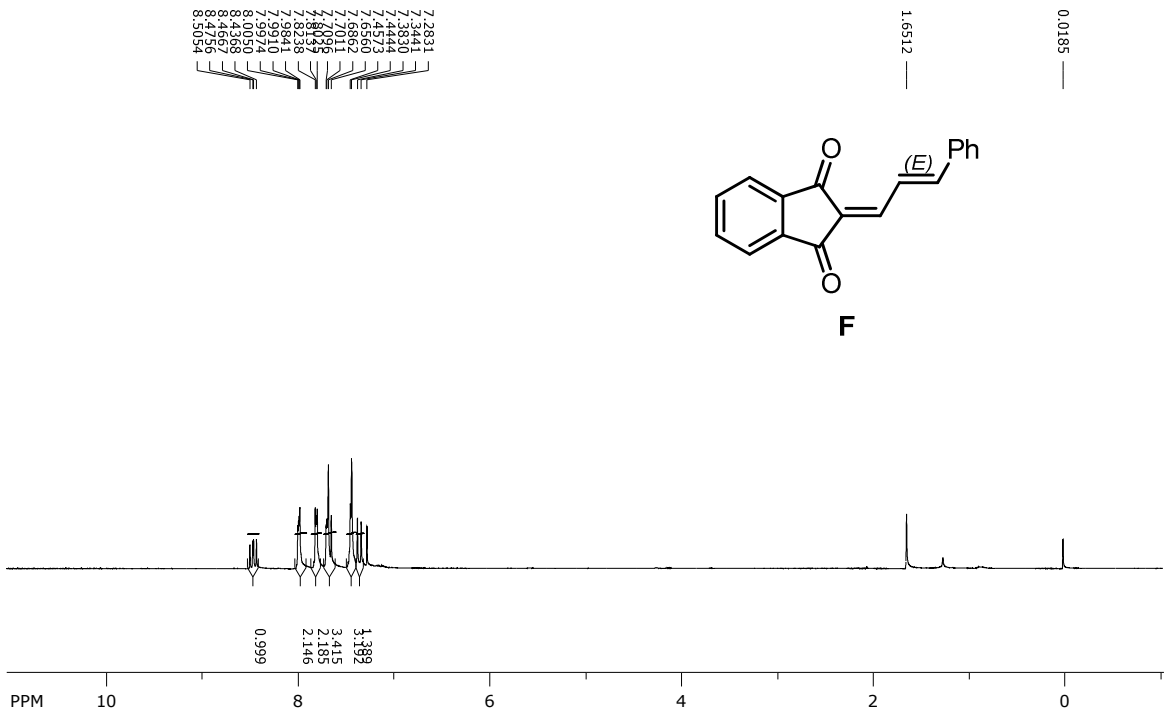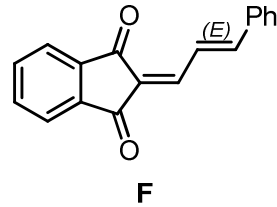

Expansion of the aromatic region of F (below):

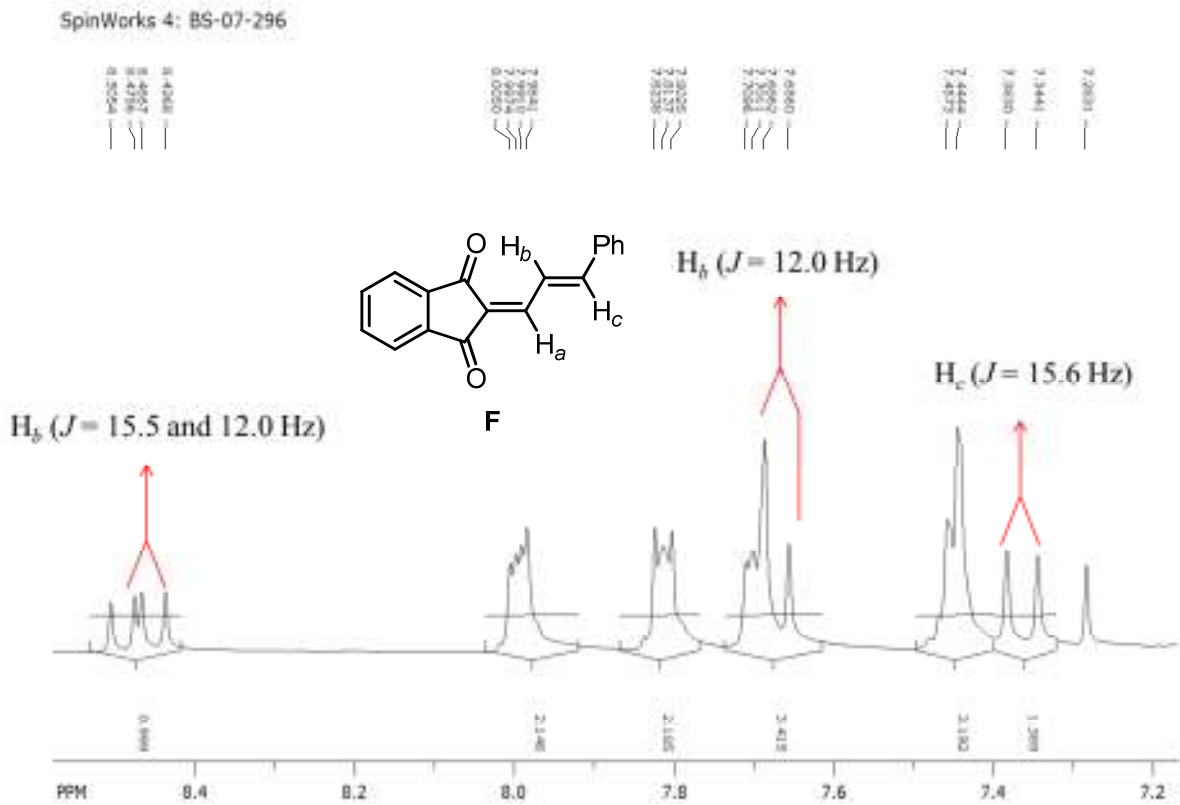

Reported  $^1\text{H}$  NMR of Compound F (F. J. Chang, R. Gurubrahmam and K. Chen, *Adv. Synth. Catal.*, 2017, 359, 1277)

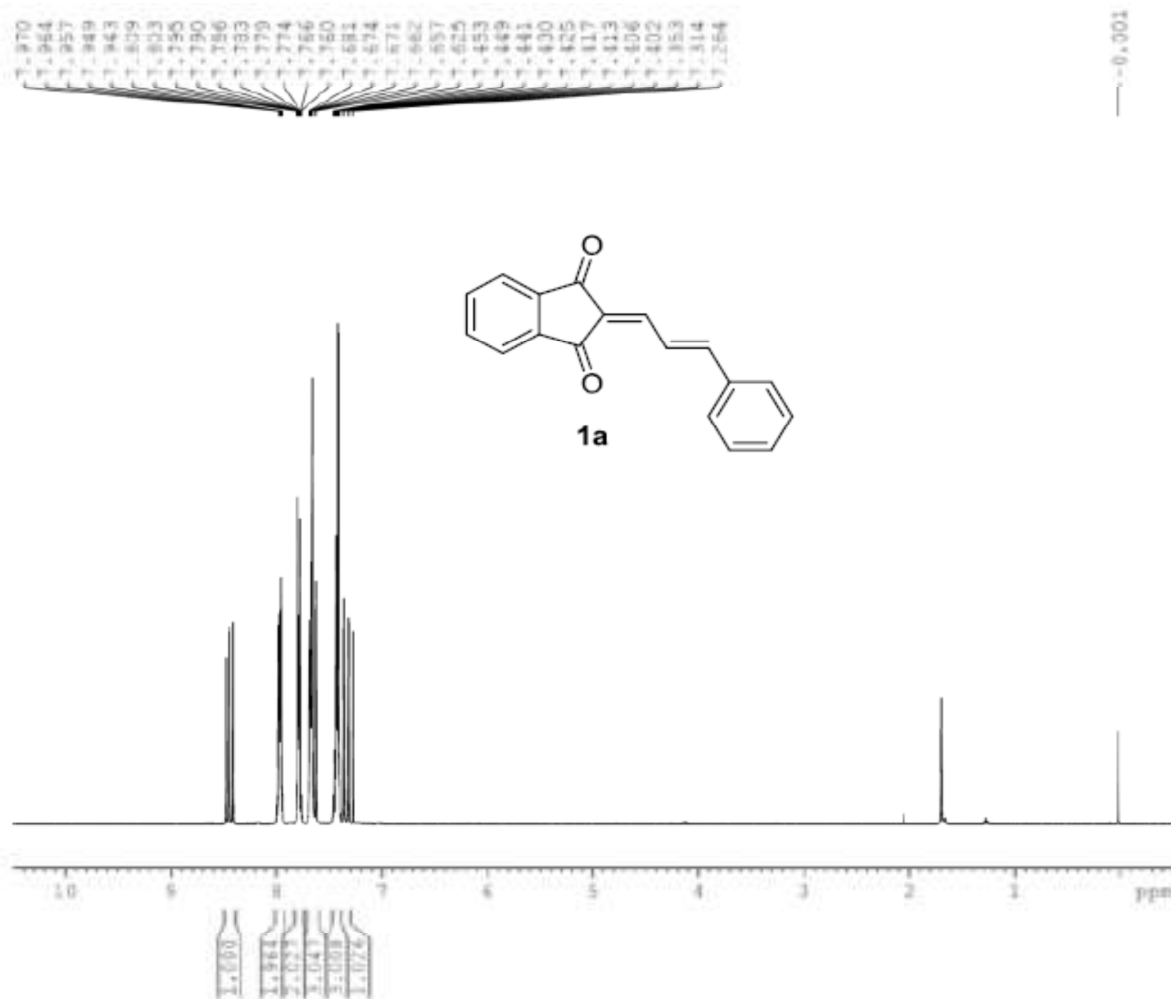

We also have performed the reaction of the dienone **D** ( $E/Z = 1:4$ ) with the chiral catalyst **9**.  $^1\text{H}$ -NMR of the diketone **F** also indicated the exclusive formation of the  $E$ -isomer.

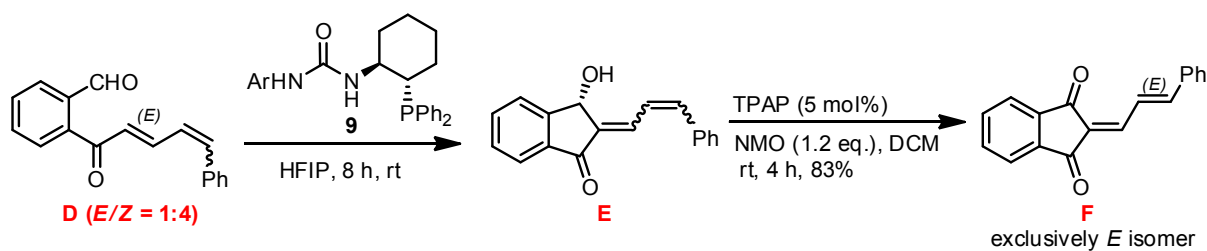



SpinWorks 3: bs-07-310

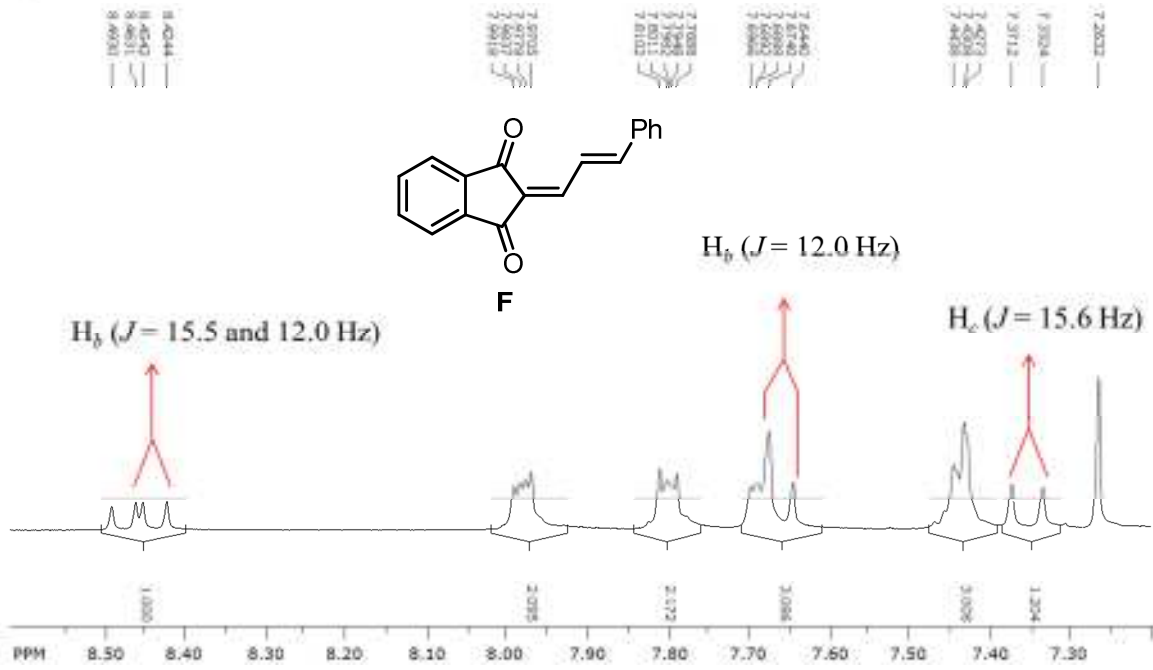

A parallel approach has also been considered for the stereoselective synthesis of the required starting material, the dienone **D** (Scheme 4). Towards this, the enynone **I** was synthesized by following a similar synthetic sequence described in Scheme 3. The dienone **D** was achieved via the selective hydrogenation of **I** using the Lindlar's catalyst. Reaction of **D** with trimethyl phosphine produced the indanone **E**, but the stereochemical information across the double bonds could not be extracted. As described earlier, the indanone **E** was oxidised to indanedione **F** and the <sup>1</sup>H-NMR spectrum indicated the formation of only the *E*-isomer of **F**. The data of **F** was also verified with the literature report.<sup>1</sup>

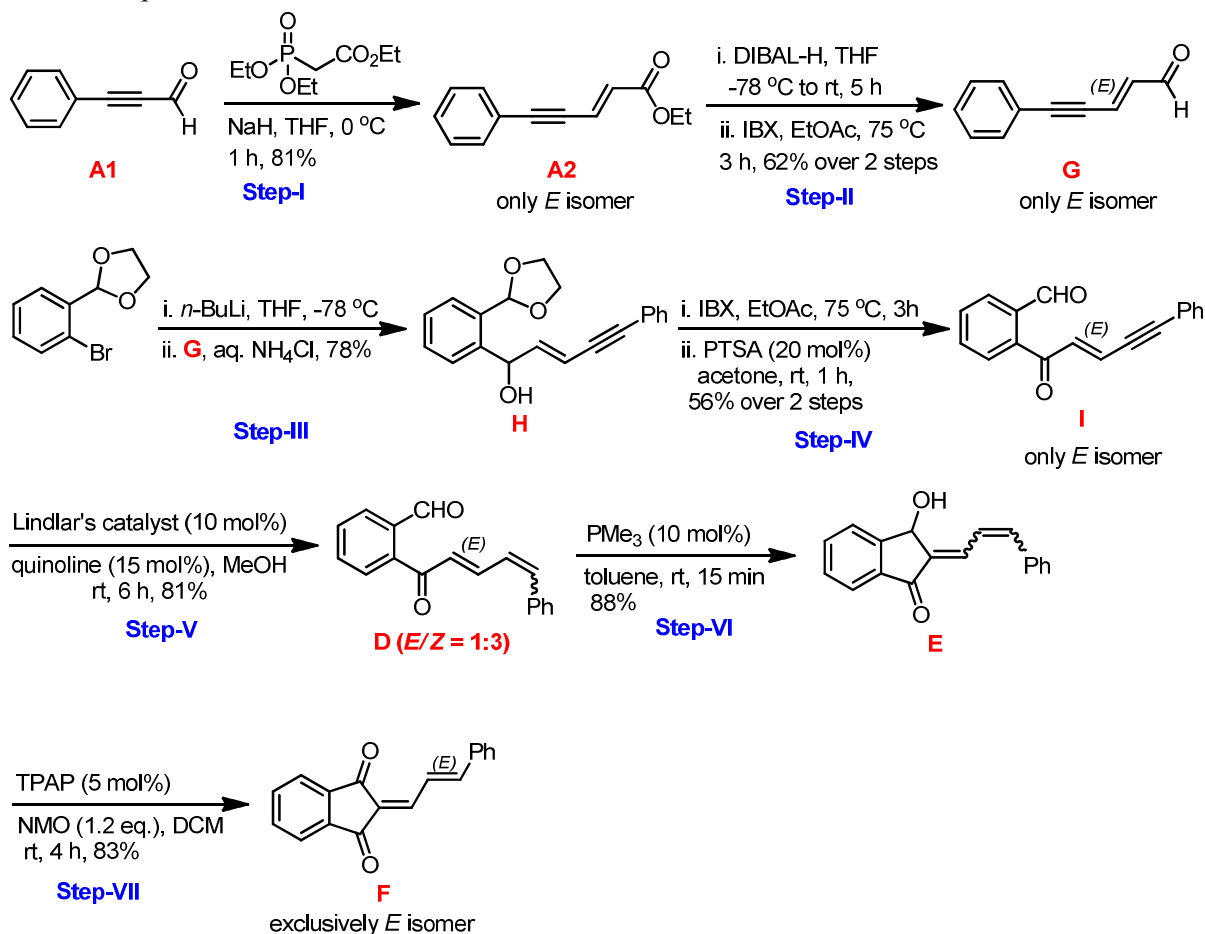

Scheme 4

SpinWorks 4: BS-07-300

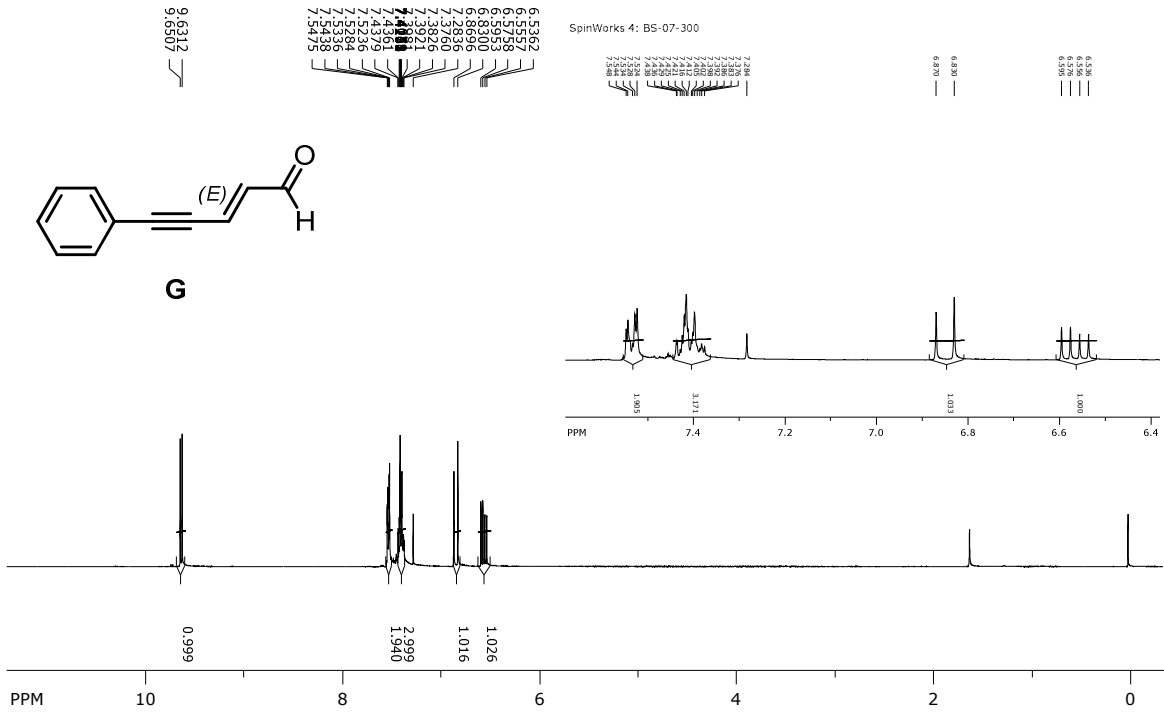

SpinWorks 4: bs-07-299

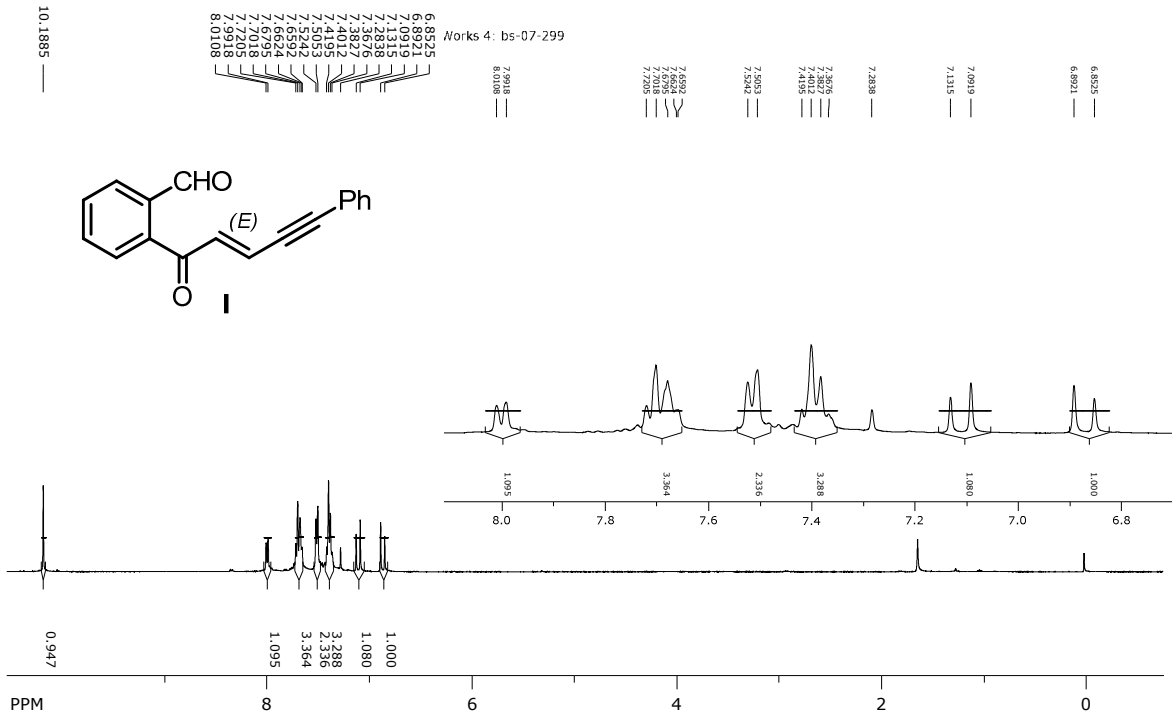





SpinWorks 4: bs-07-306

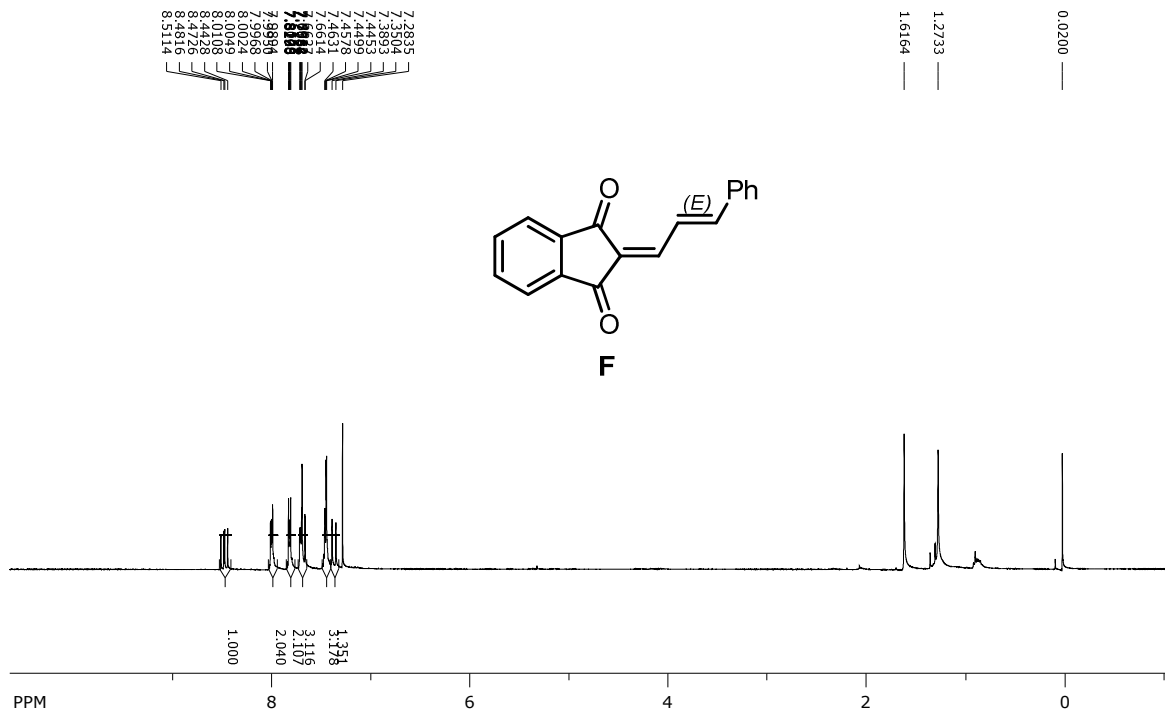

Expansion of the aromatic region of F (below):

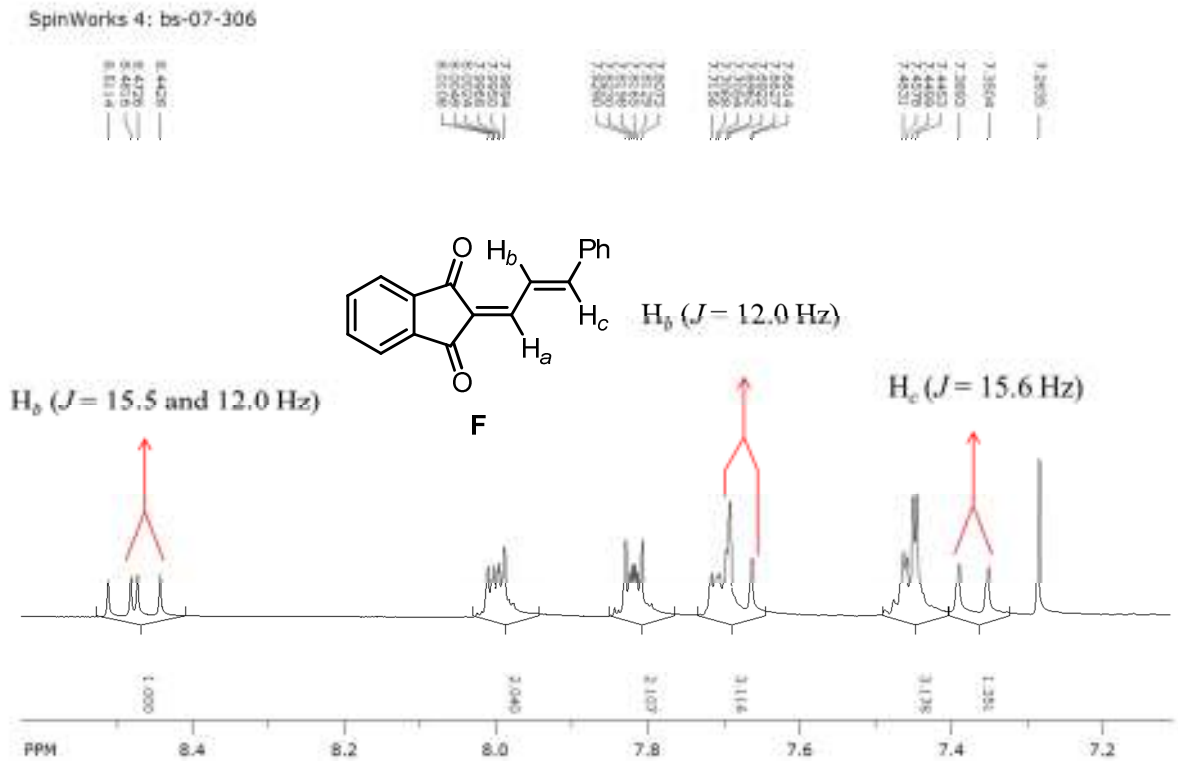

Reported  $^1\text{H}$  NMR of Compound **F** (F. J. Chang, R. Gurubrahmam and K. Chen, *Adv. Synth. Catal.*, 2017, **359**, 1277)

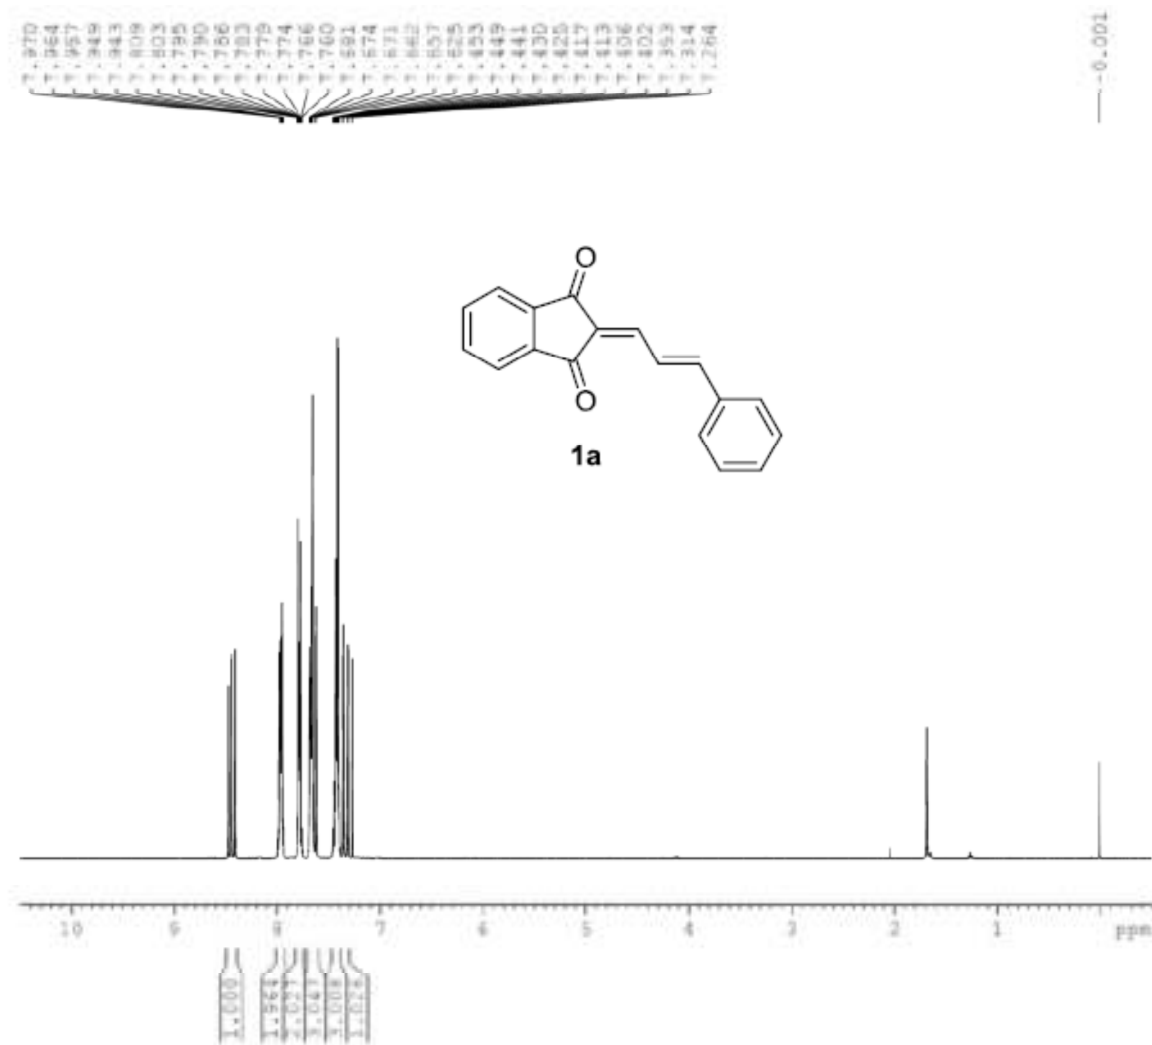

We also have performed the reaction of the dienone **D** ( $E/Z = 1:3$ ) with the chiral catalyst **9**.  $^1\text{H}$ -NMR of the diketone **F** also indicated the exclusive formation of the *E*-isomer.

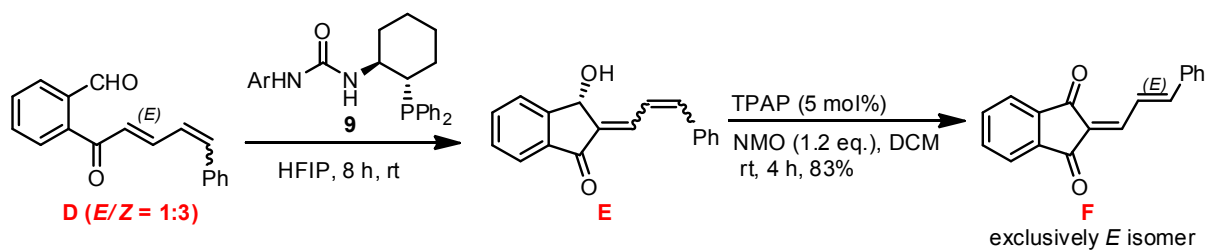

SpinWorks 3: bs-07-312

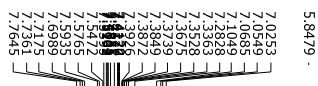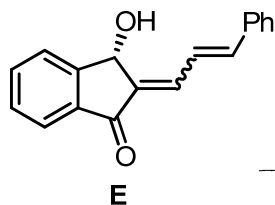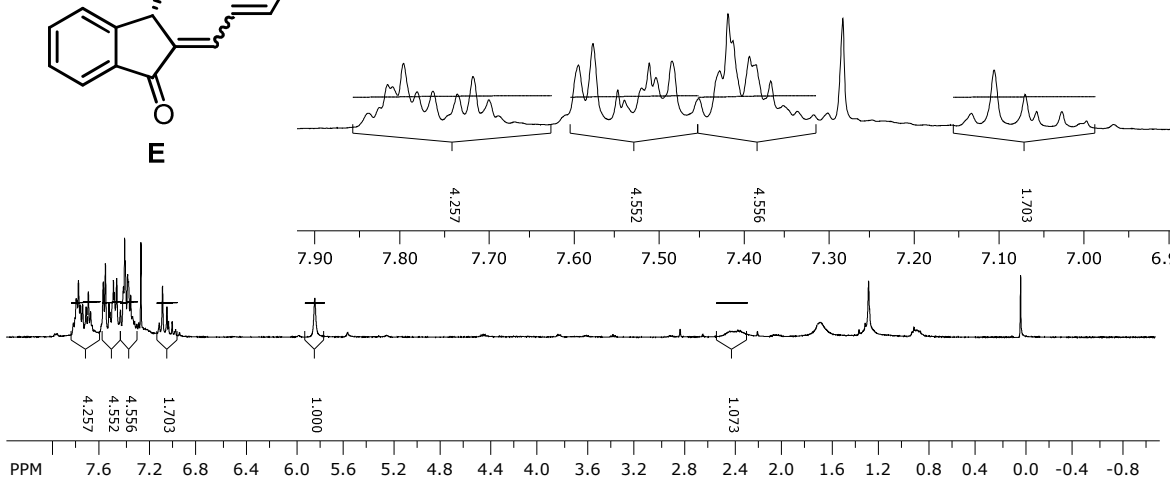

SpinWorks 3: bs-07-315

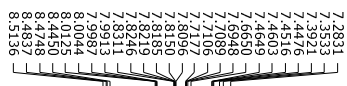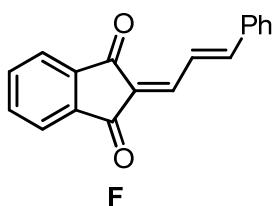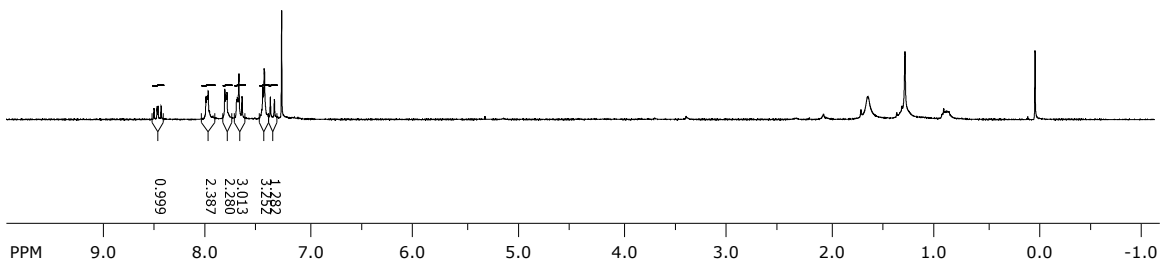

Expansion of the aromatic region of F (below):

SpinWorks 3: bs-07-315

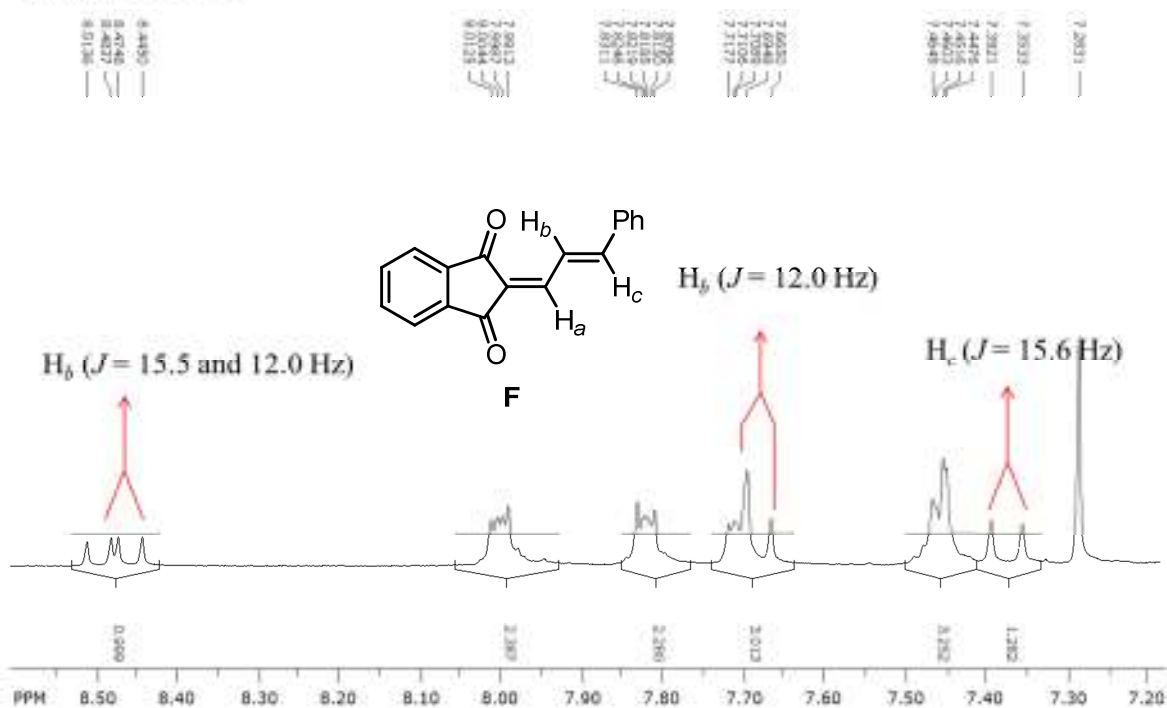



SpinWorks 4: BS 05 212  
PROTON CDCI3 /opt/topspin nmrsu 15

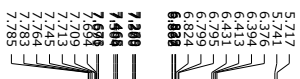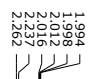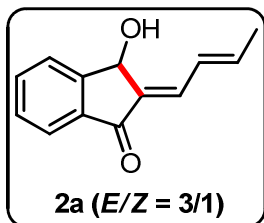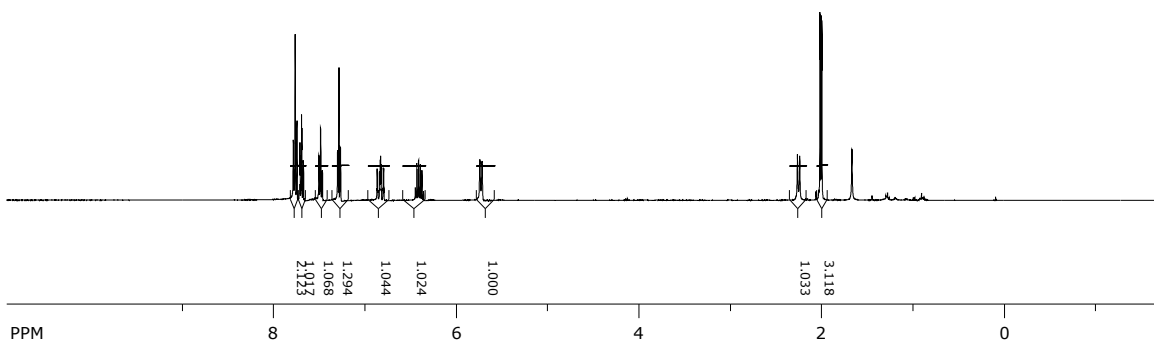

SpinWorks 4: BS 05 212  
C13CPD256 CDCI3 /opt/topspin nmrsu 15

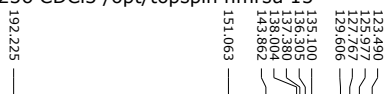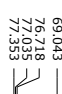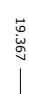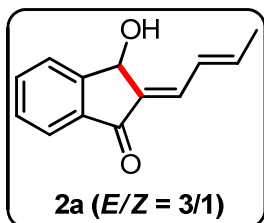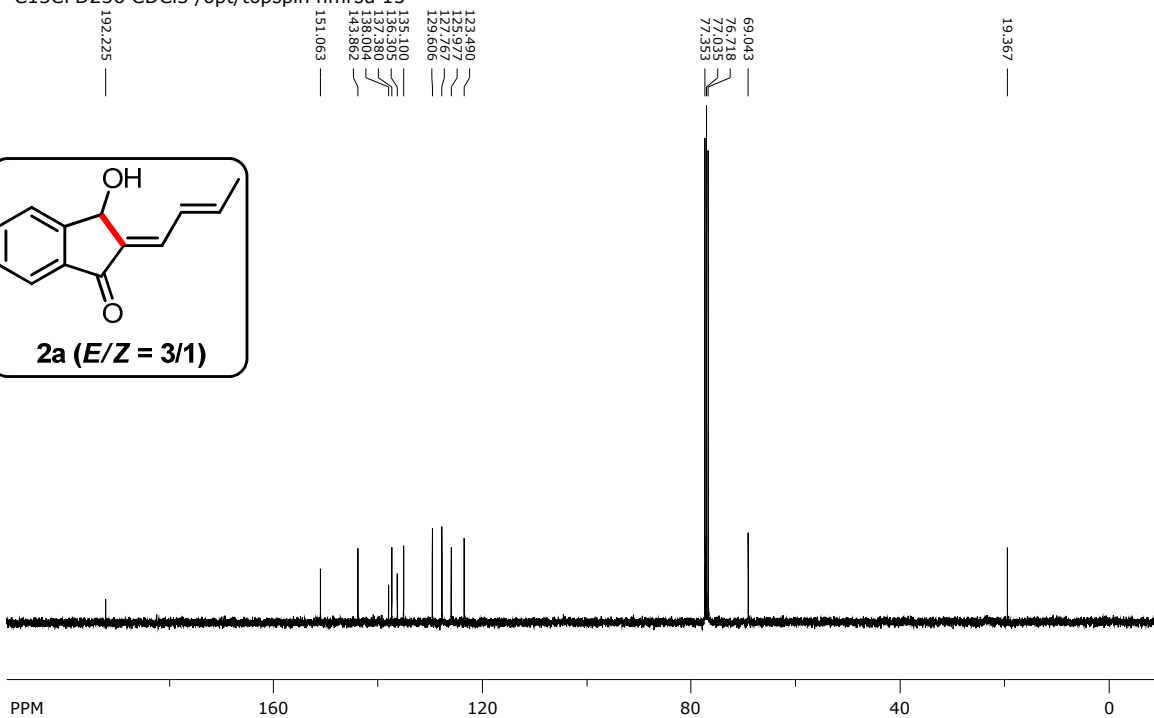

SpinWorks 4: BS 06 270  
PROTON CDCI3 /opt/topspin3.5pl2/nmrdata nmrsu 26

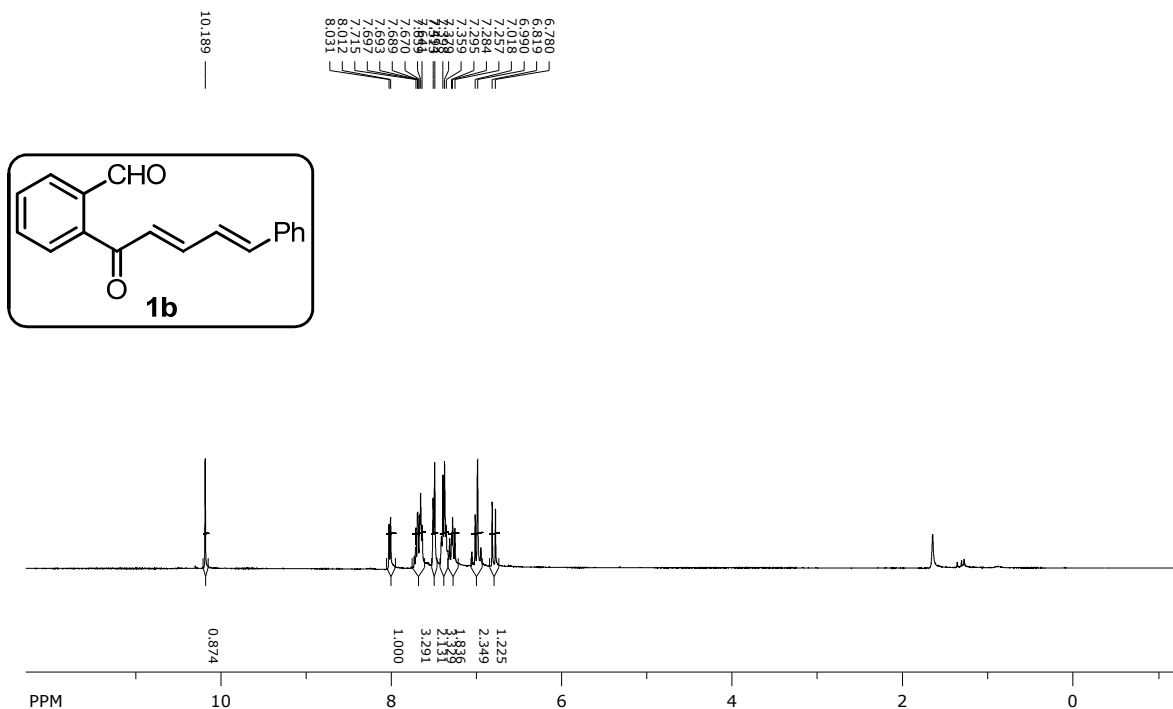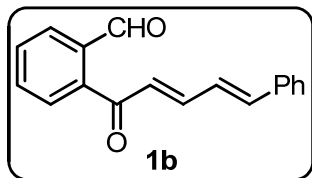

SpinWorks 4: BS 06 270  
C13CPD256 CDCI3 /opt/topspin3.5pl2/nmrdata nmrsu 26

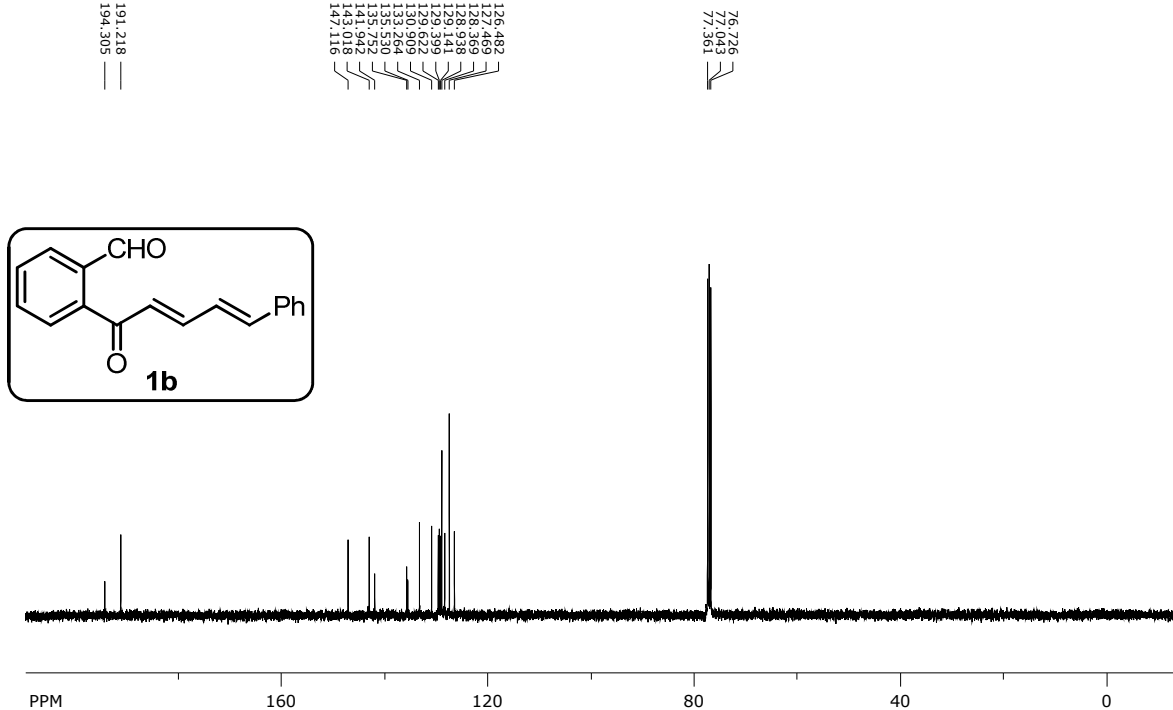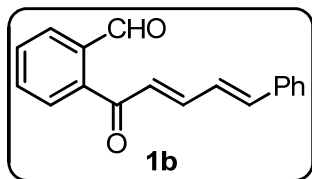



SpinWorks 4: BS 06 281  
 PROTON CDCI3 /opt/topspin3.5pl2/nmrdata nmrsu 45

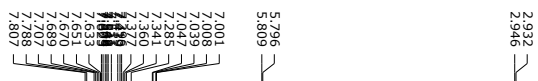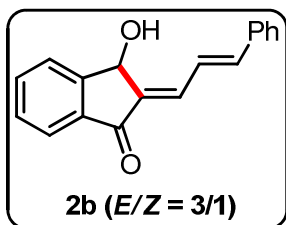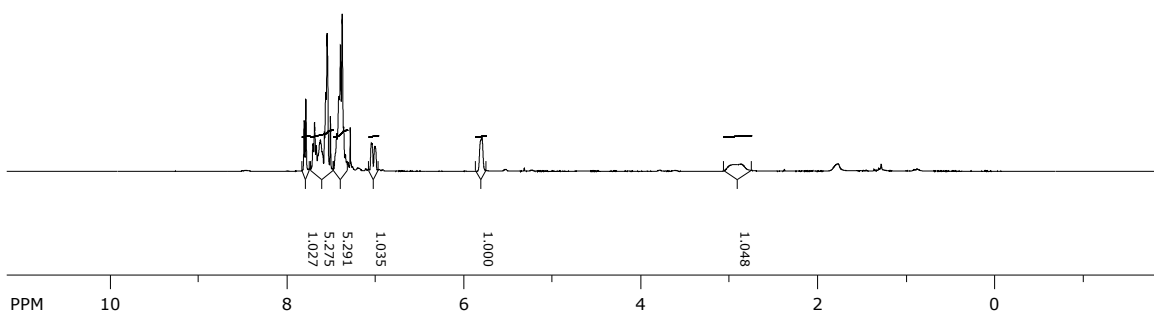

SpinWorks 4: BS 06 281  
 C13CPD256 CDCI3 /opt/topspin3.5pl2/nmrdata nmrsu 45

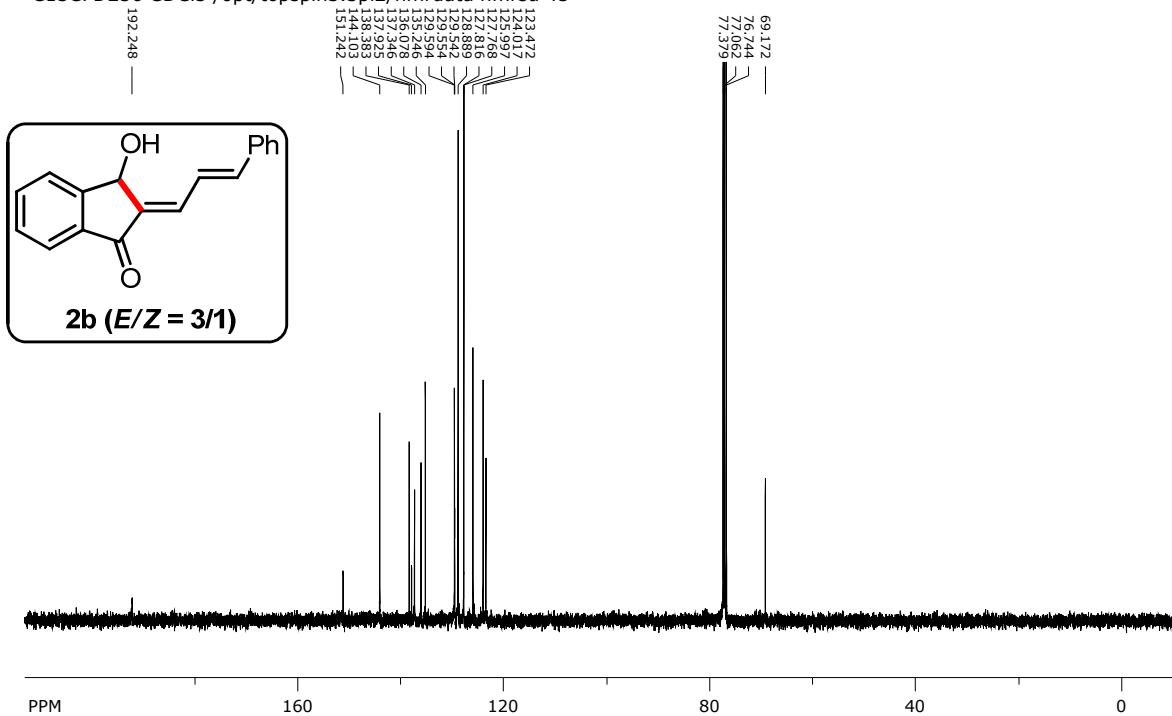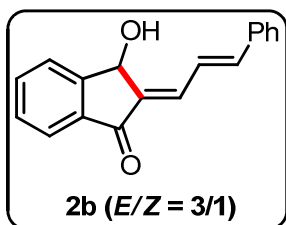

SpinWorks 4: BS 06 510  
PROTON CDCI3 /opt/topspin3.5pl2/nmrdata nmrsu 28

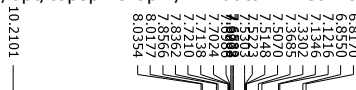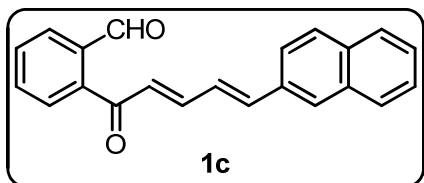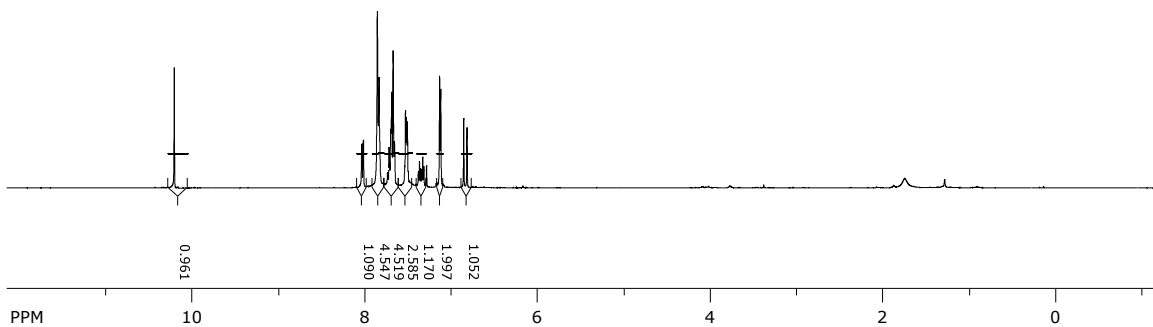

SpinWorks 4: BS 06 510  
C13CPD256\_CDCI3 /opt/topspin3.5pl2/nmrdata nmrsu 28

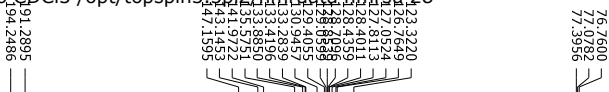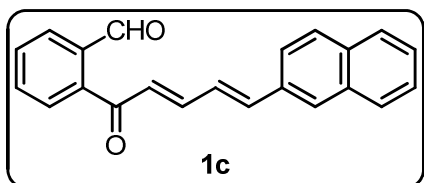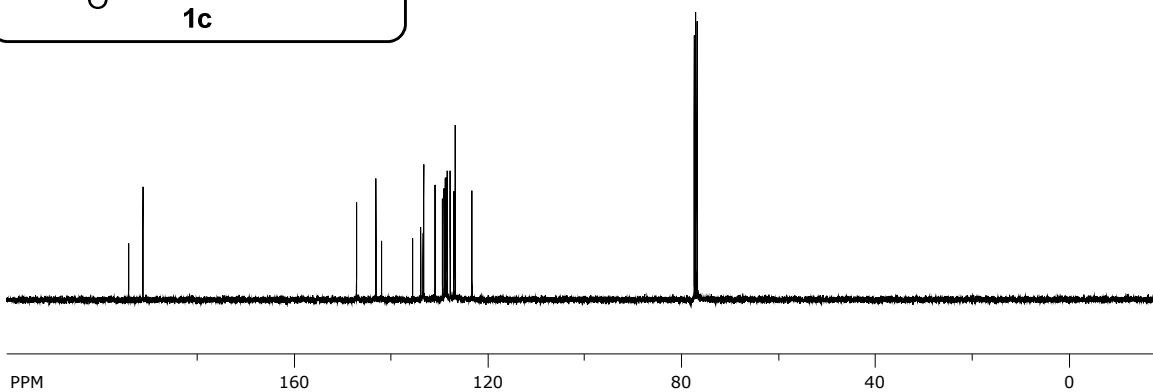



SpinWorks 4: BS 06 500  
PROTON CDCl3 /opt/topspin3.5pl2/nmrdata nmrsu 26

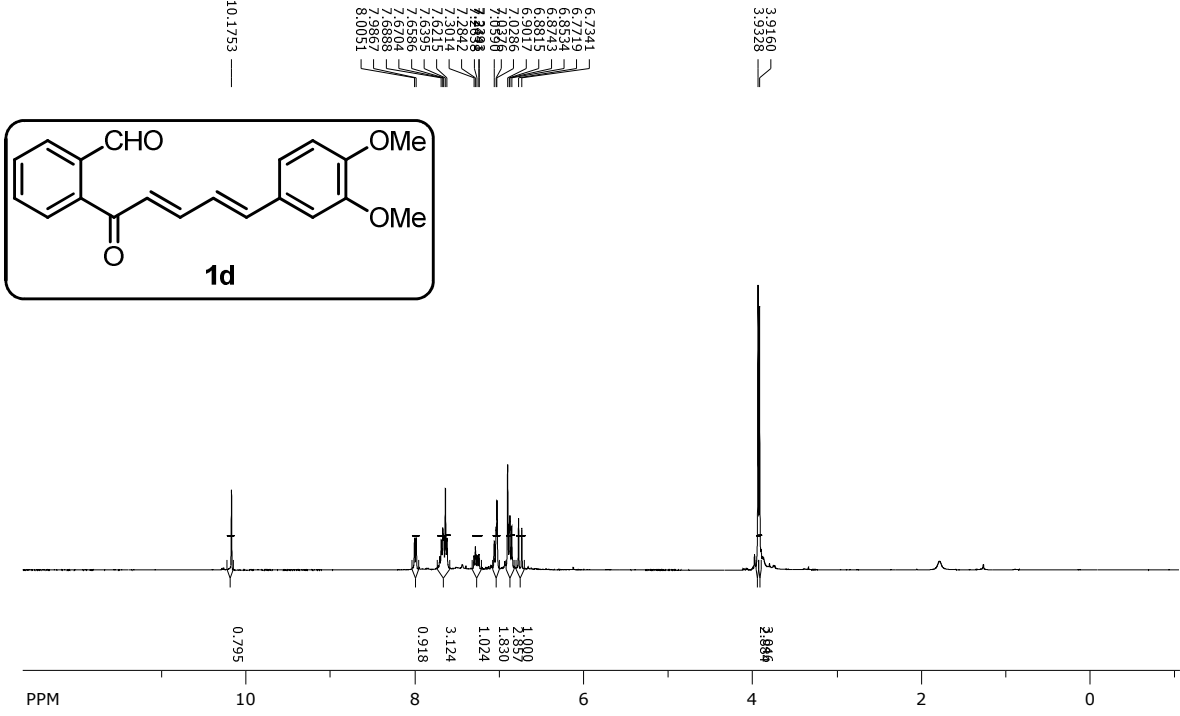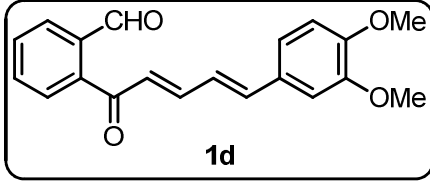

SpinWorks 4: BS 06 500  
C13CPD256\_CDCl3 /opt/topspin3.5pl2/nmrdata nmrsu 26

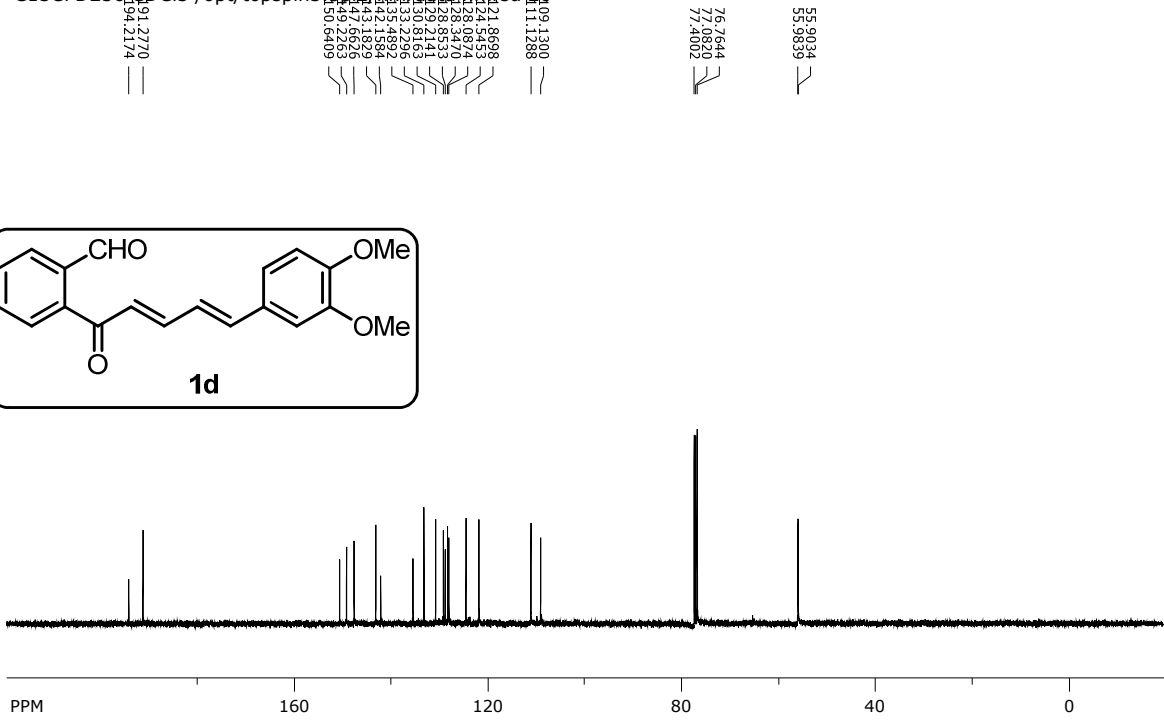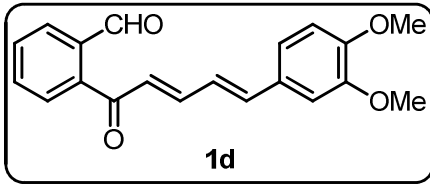

SpinWorks 4: BS 06 502  
 PROTON DMSO /opt/topspin3.5pl2/nmrdata nmrsu 27

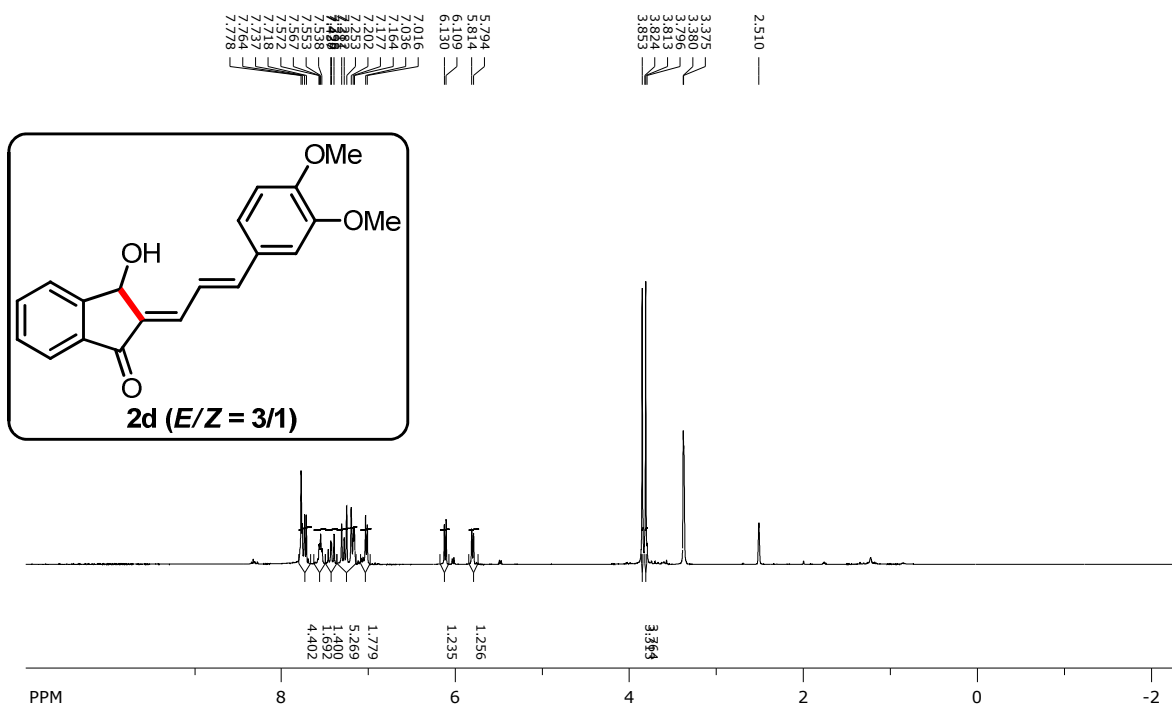

SpinWorks 4: BS 06 502  
 C13CPD DMSO /opt/topspin3.5pl2/nmrdata nmrsu 27

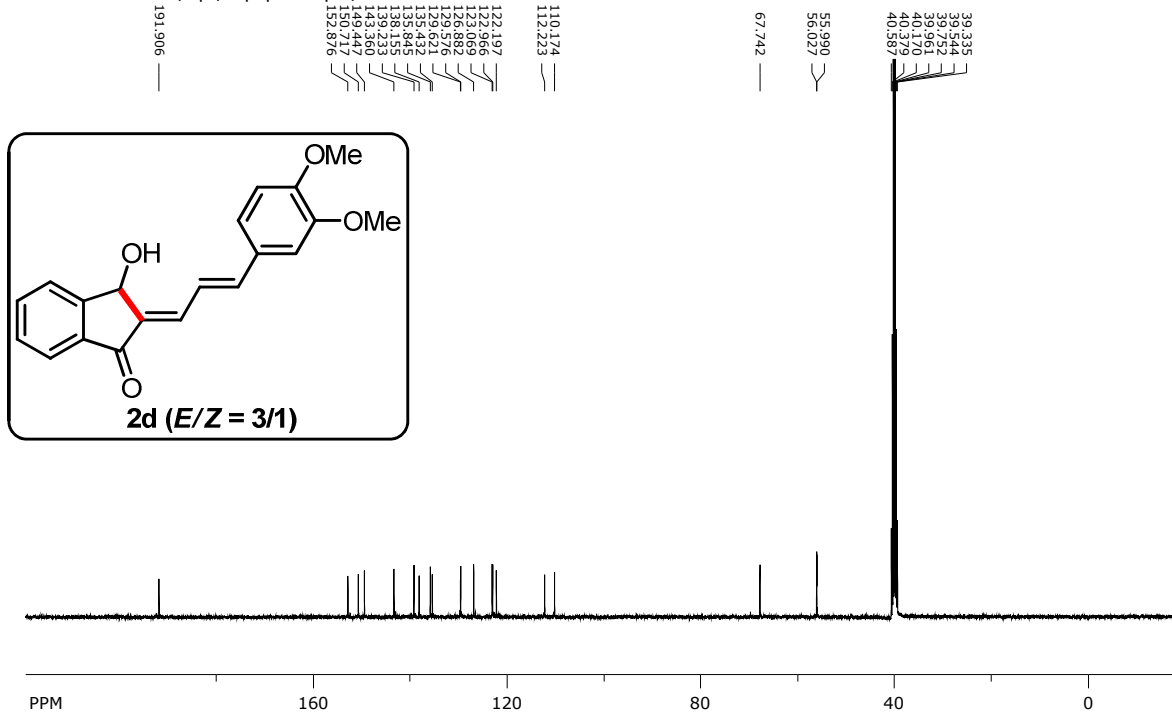

SpinWorks 4: BS 06 326  
 PROTON CDCI3 /opt/topspin3.5pl2/nmrdata nmrsu 26

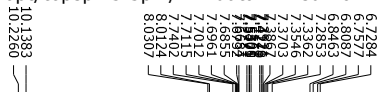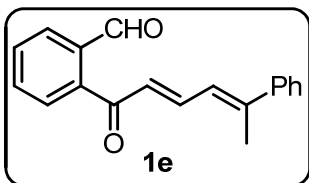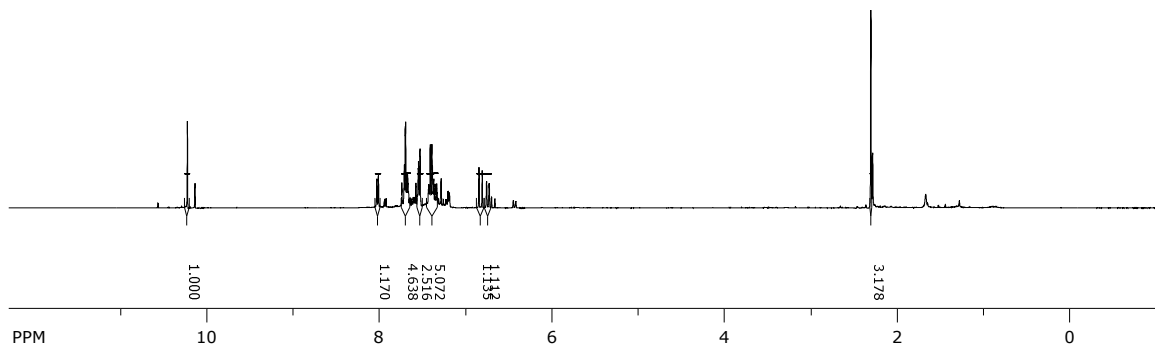

SpinWorks 4: BS 06 326  
 C13CPD256\_CDCI3 /opt/topspin3.5pl2/nmrdata nmrsu 26

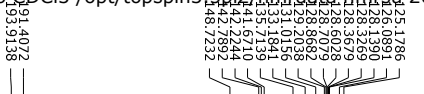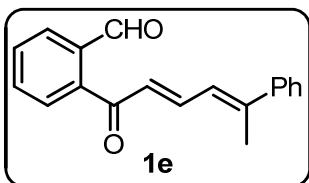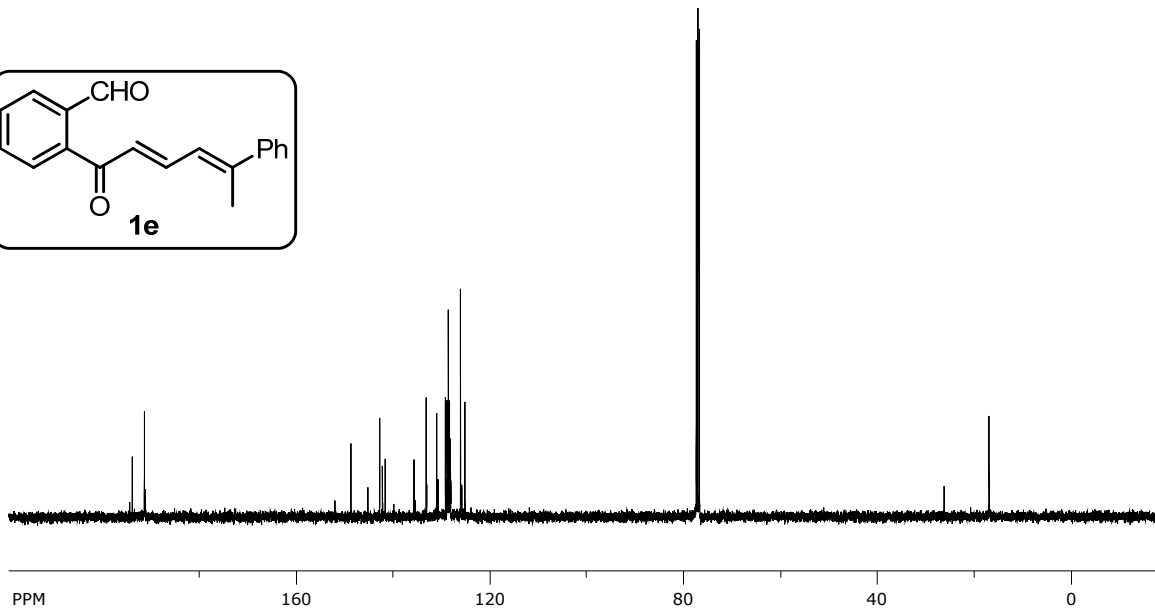



SpinWorks 4: bs-06-217

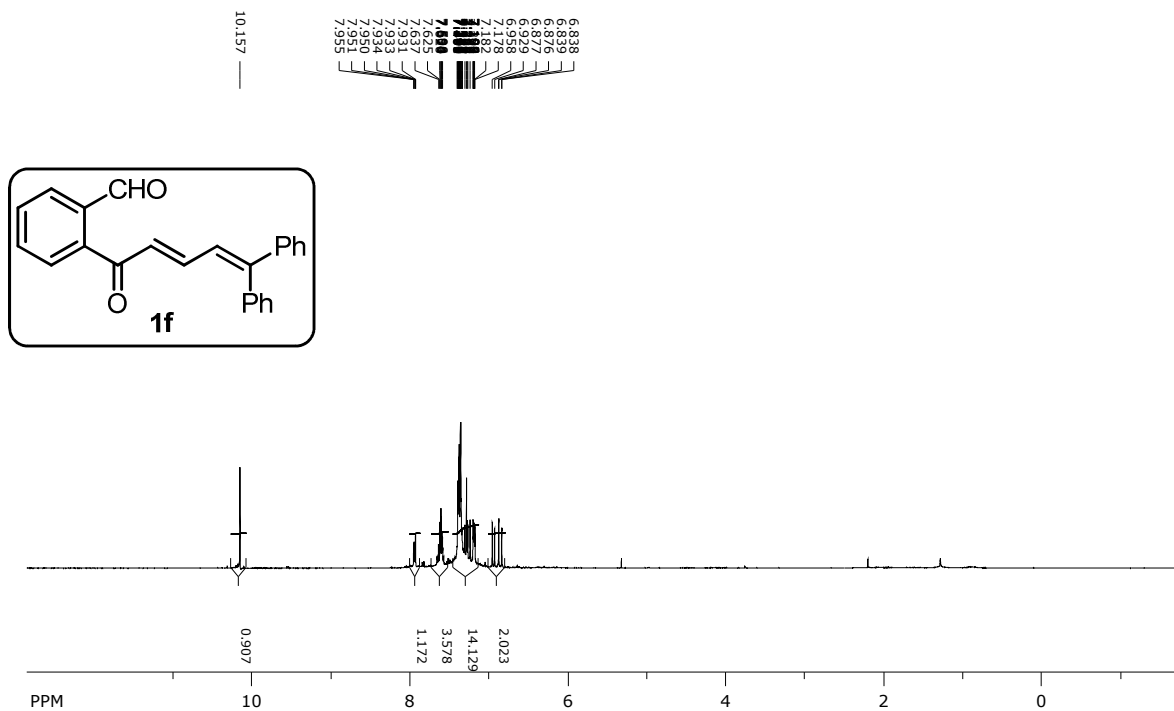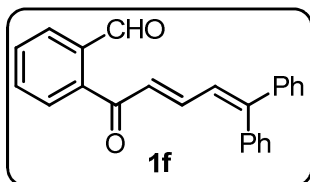

SpinWorks 4: BS 06 217  
C13CPD CDCl3 /opt/topspin3.5pl2/nmrdata nmrsu 15

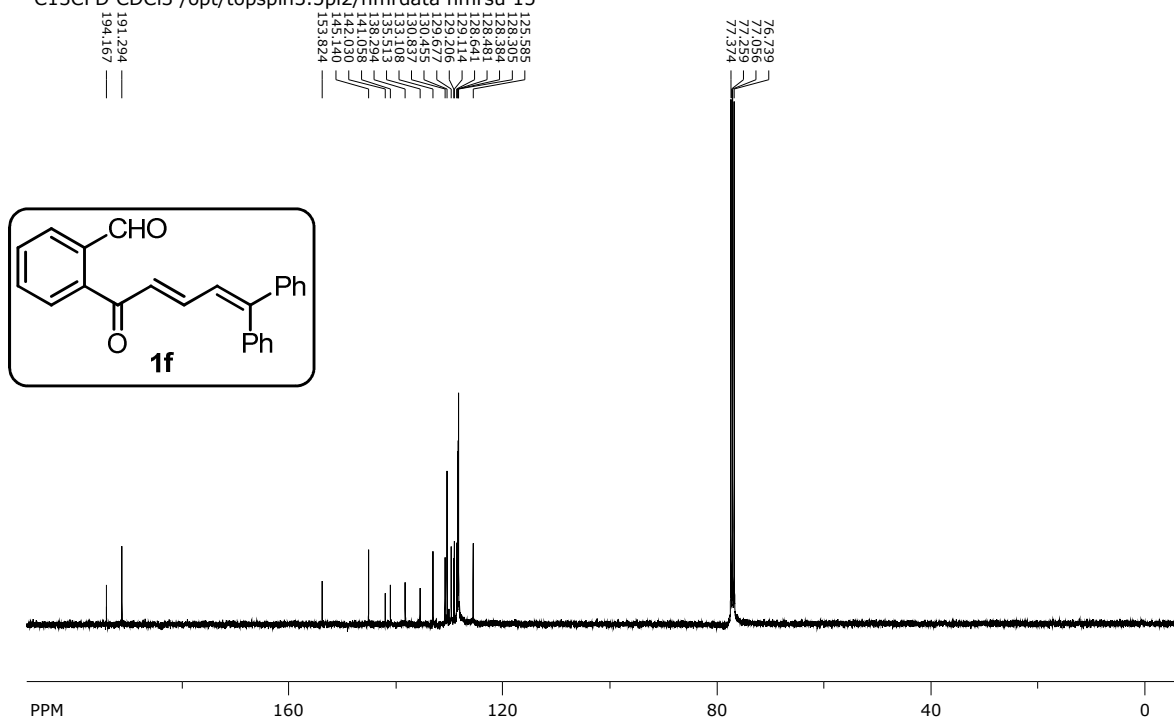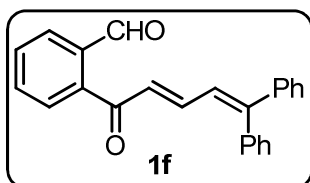



SpinWorks 4: BS-06-218-Re

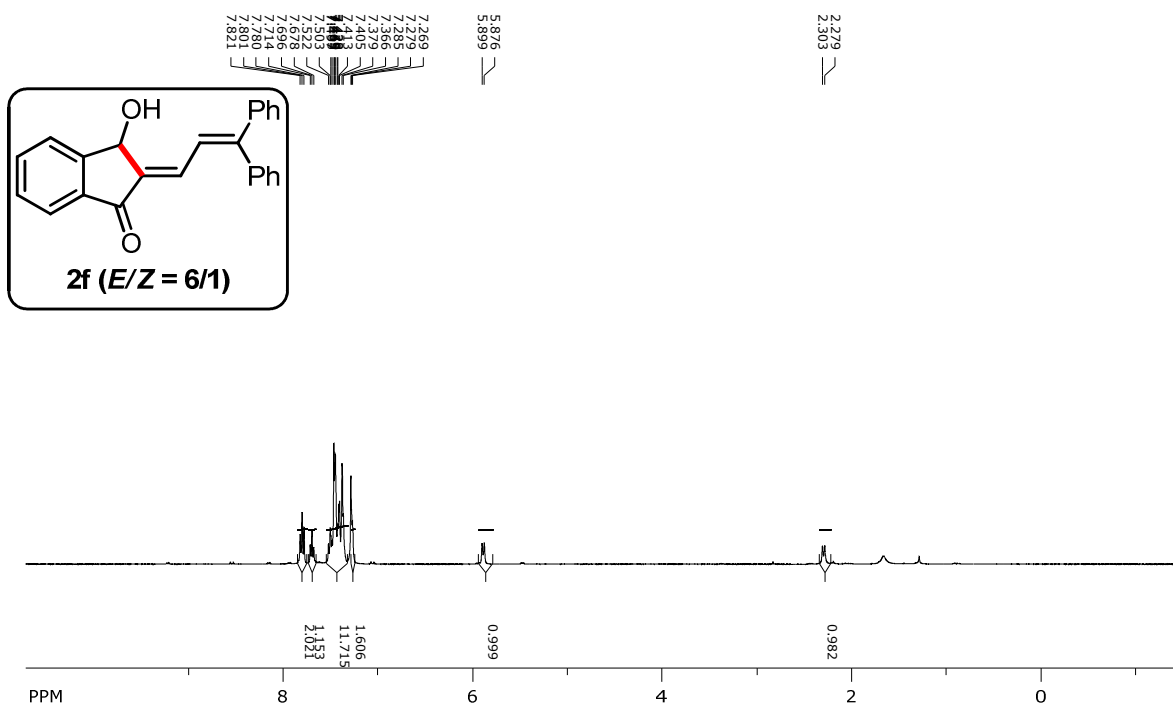

SpinWorks 4: BS 06 218 RE  
C13CPD256 CDCl3 /opt/topspin3.5pl2/nmrdata nmrsu 55

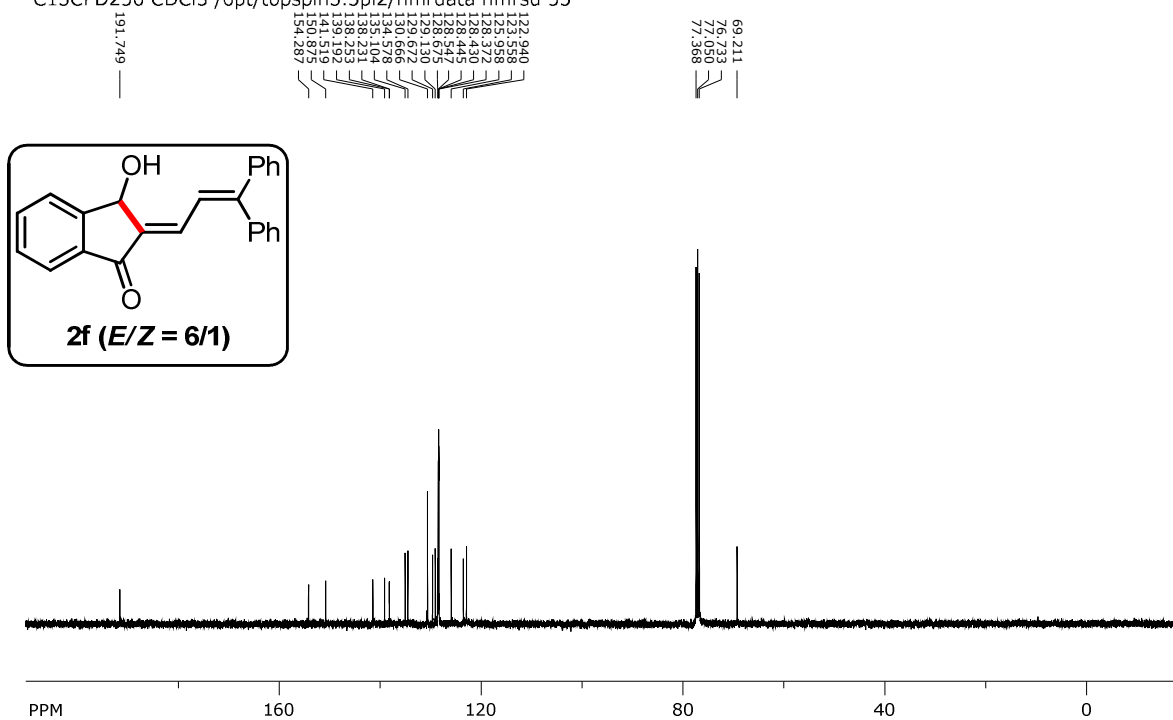

SpinWorks 4: BS 06 200  
 PROTON CDCI3 /opt/topspin3.5pl2/nmrdata nmrsu 47

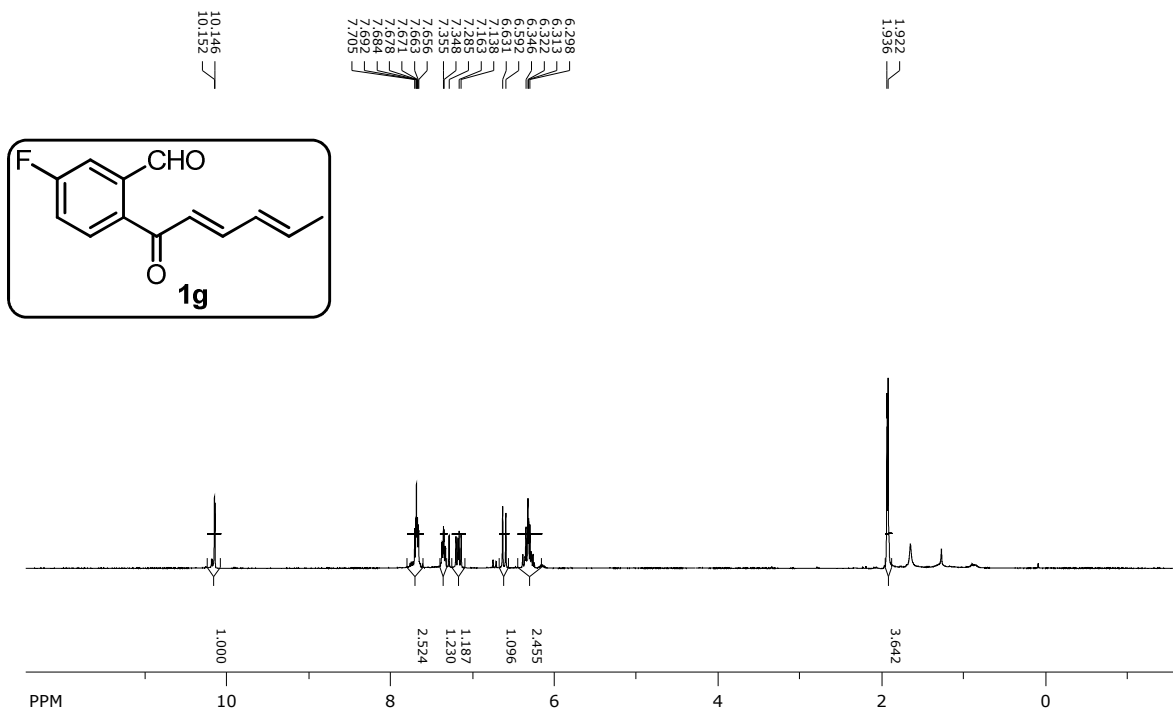

SpinWorks 4: BS 06 200  
 C13CPD256 CDCI3 /opt/topspin3.5pl2/nmrdata nmrsu 47

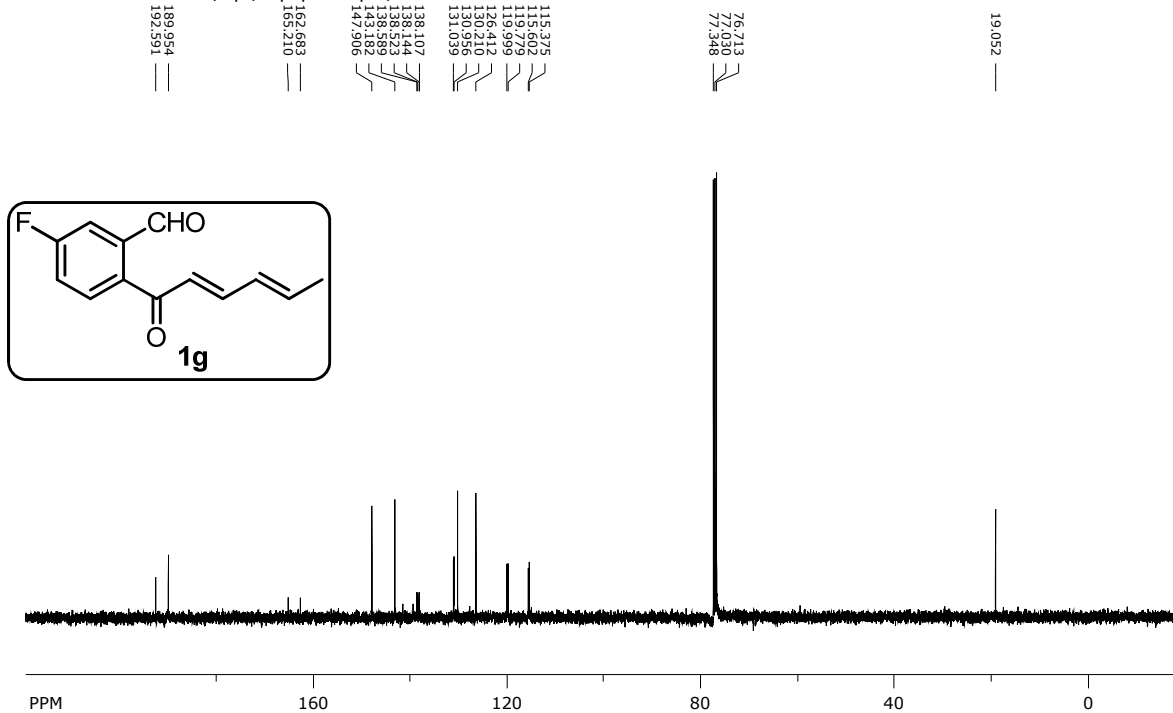

SpinWorks 4: BS 06 200  
F19CPD CDCl3 /opt/topspin3.5pl2/nmrdata nmrsu 47

-106.738

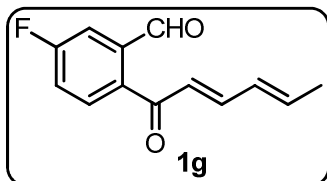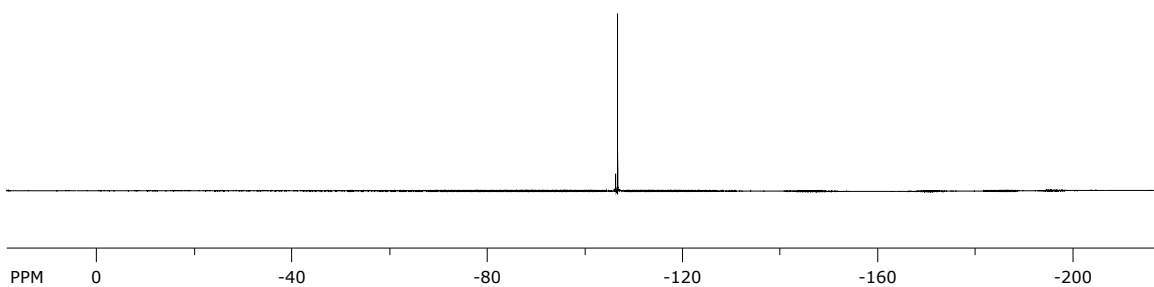

SpinWorks 4: BS 06 208  
PROTON CDCl3 /opt/topspin3.5pl2/nmrdata nmrsu 11

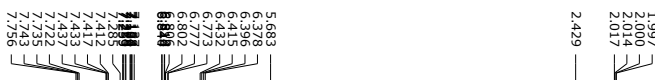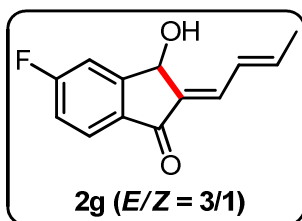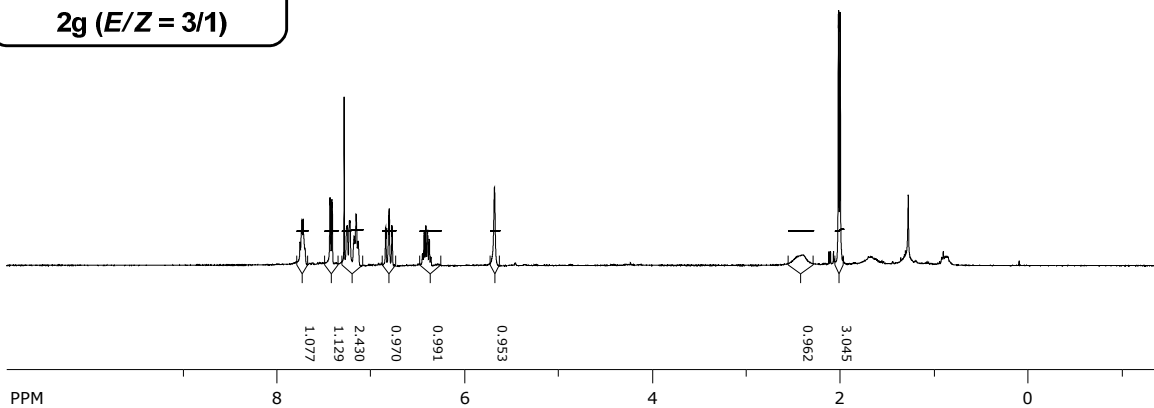

SpinWorks 4: BS 06 208  
C13CPD256 CDCl3 /opt/topspin3.5pl2/nmrdata nmrsu 11

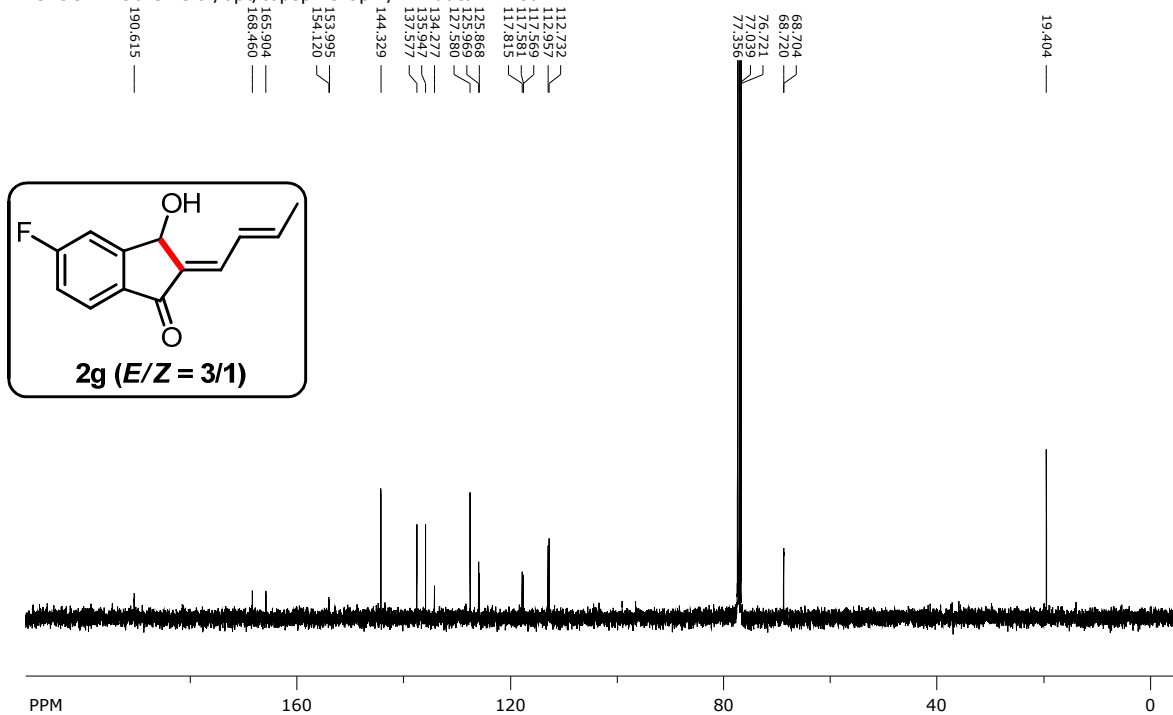

SpinWorks 4: BS 06 208  
F19CPD CDCl3 /opt/topspin3.5pl2/nmrdata nmrsu 11

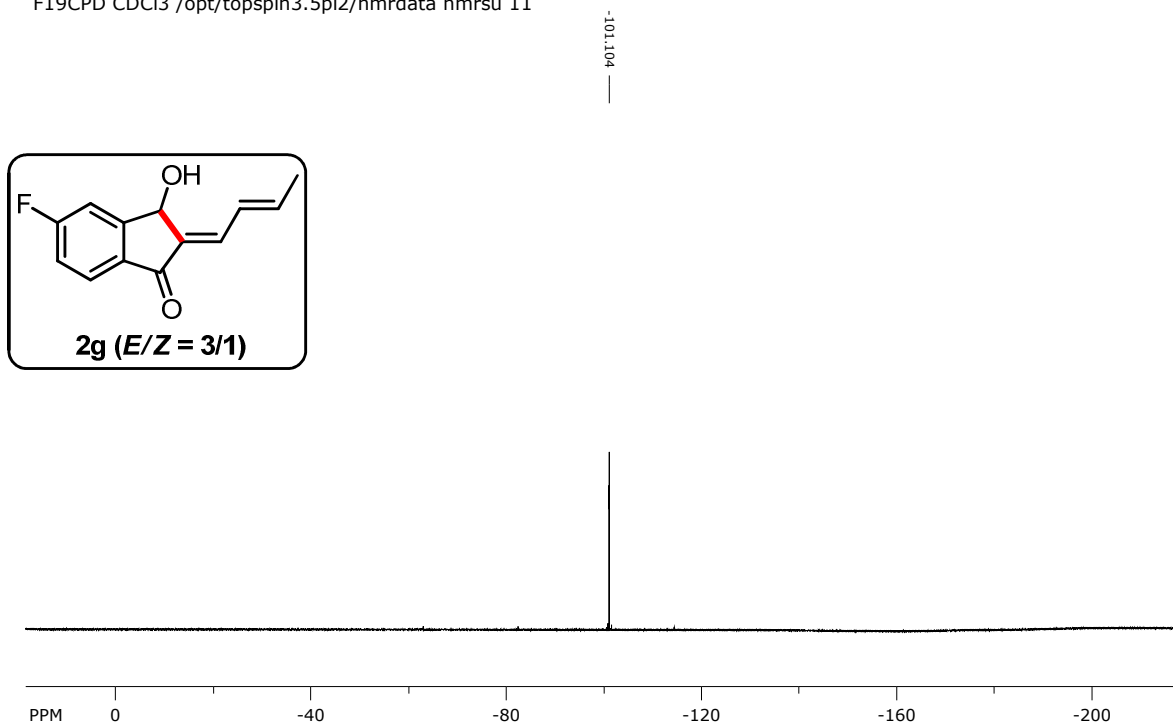

SpinWorks 4: BS 06 185  
PROTON CDCI3 /opt/topspin3.5pl2/nmrdata nmrsu 24

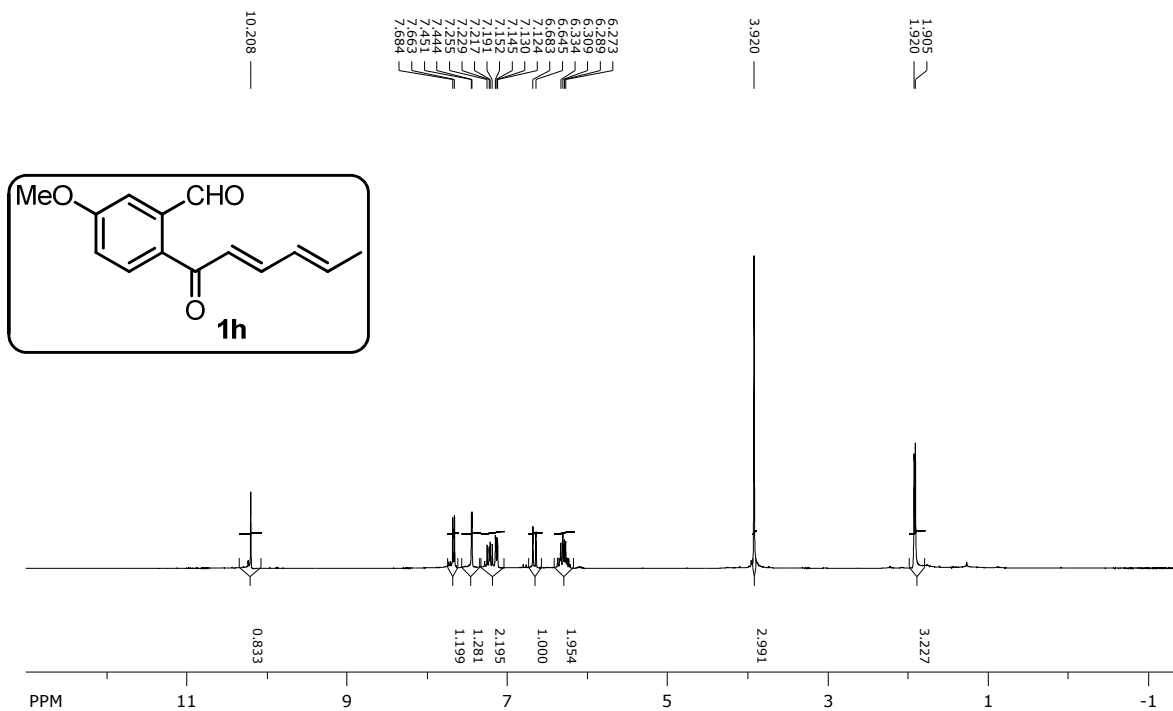

SpinWorks 4: BS 06 185  
C13CPD256 CDCI3 /opt/topspin3.5pl2/nmrdata nmrsu 24

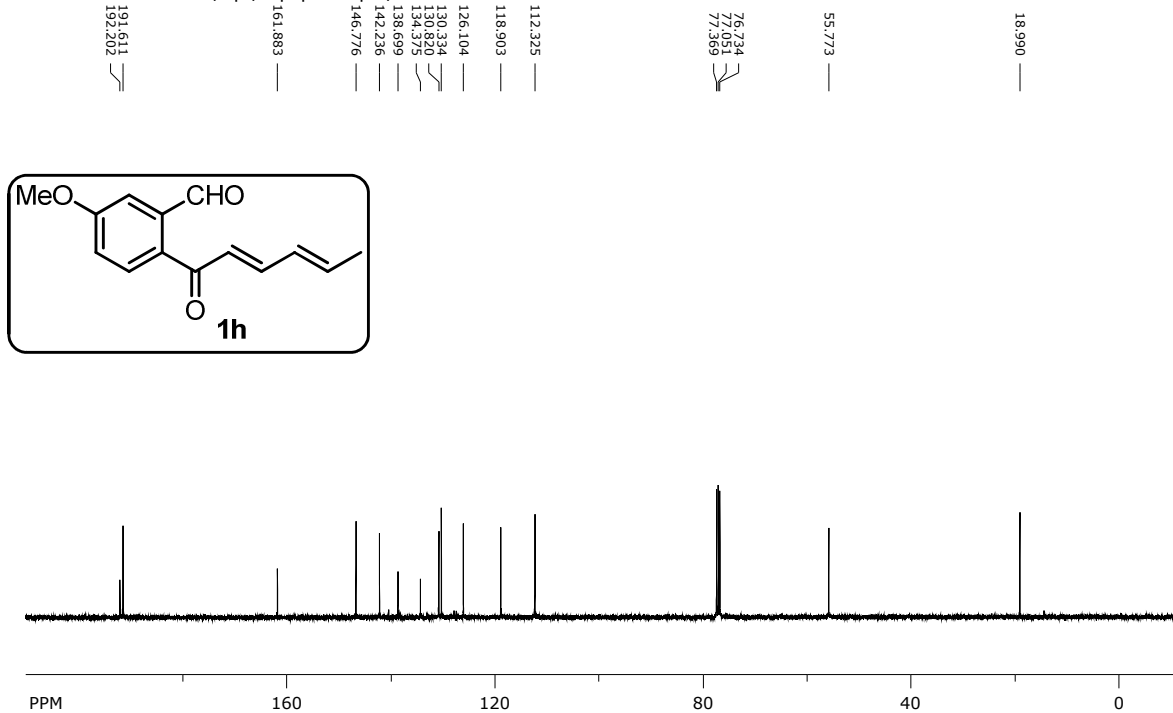

SpinWorks 4: bs-06-186

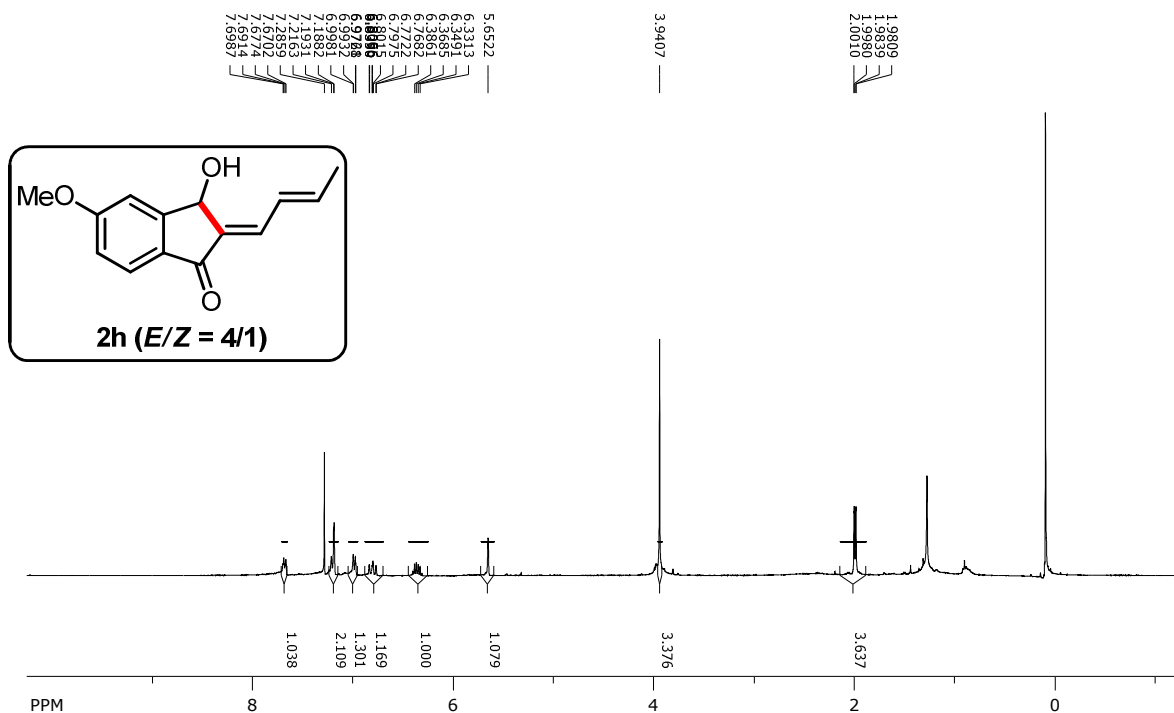

SpinWorks 4: BS 06 186  
C13CPD CDCl3 /opt/topspin3.5pl2/nmrdata nmrsu 13

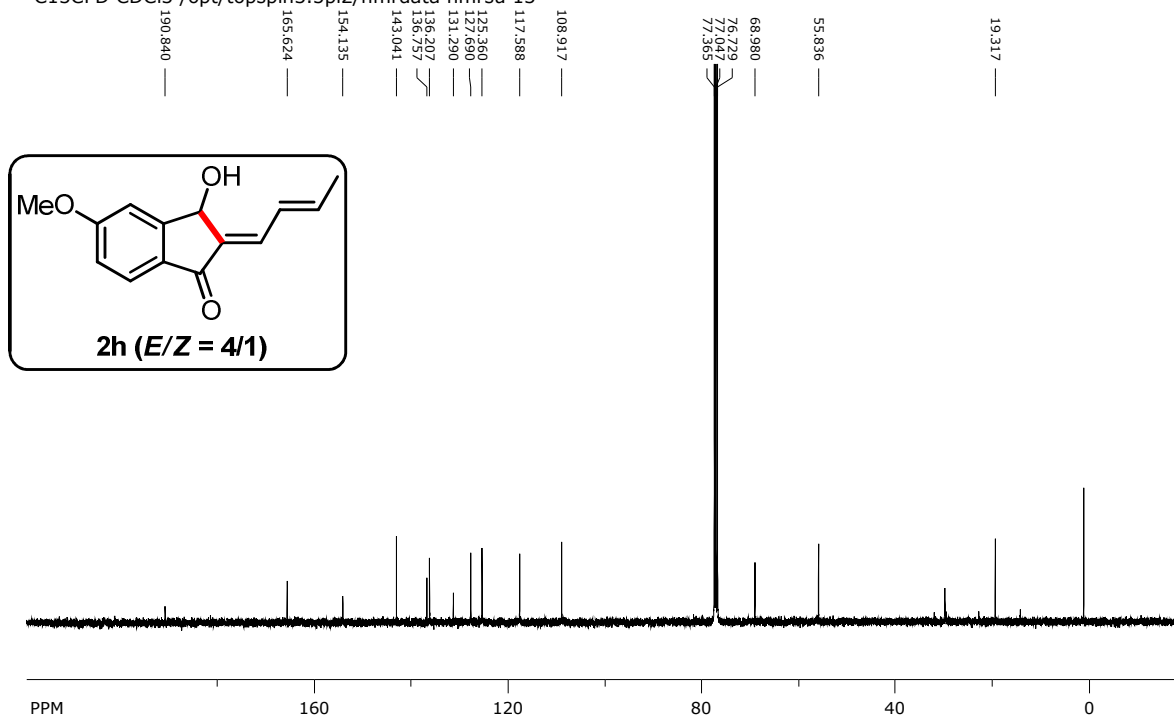

SpinWorks 4: bs-06-550

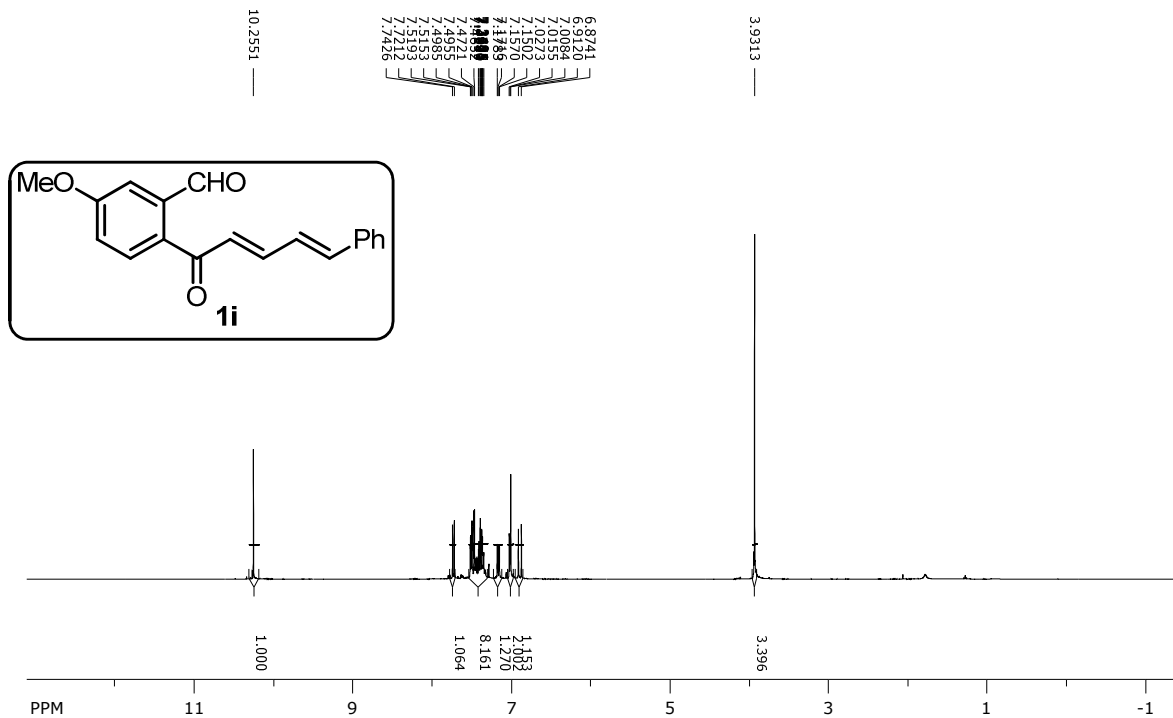

SpinWorks 4: BS 06 550

C13CPD256 CDCl<sub>3</sub> /opt/topspin3.5pl2/nmrdata/nmr\_su\_12

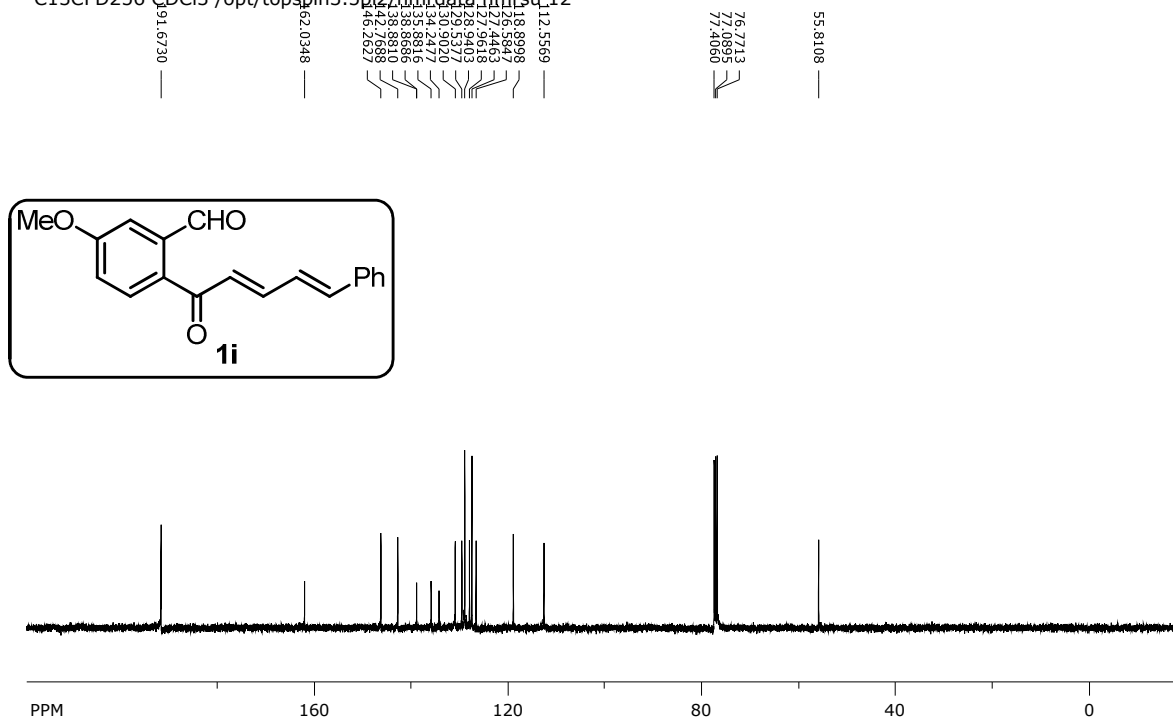





SpinWorks 4: BS 06 610  
PROTON CDCI3 /opt/topspin3.5pl2/nmrdata nmrsu 35

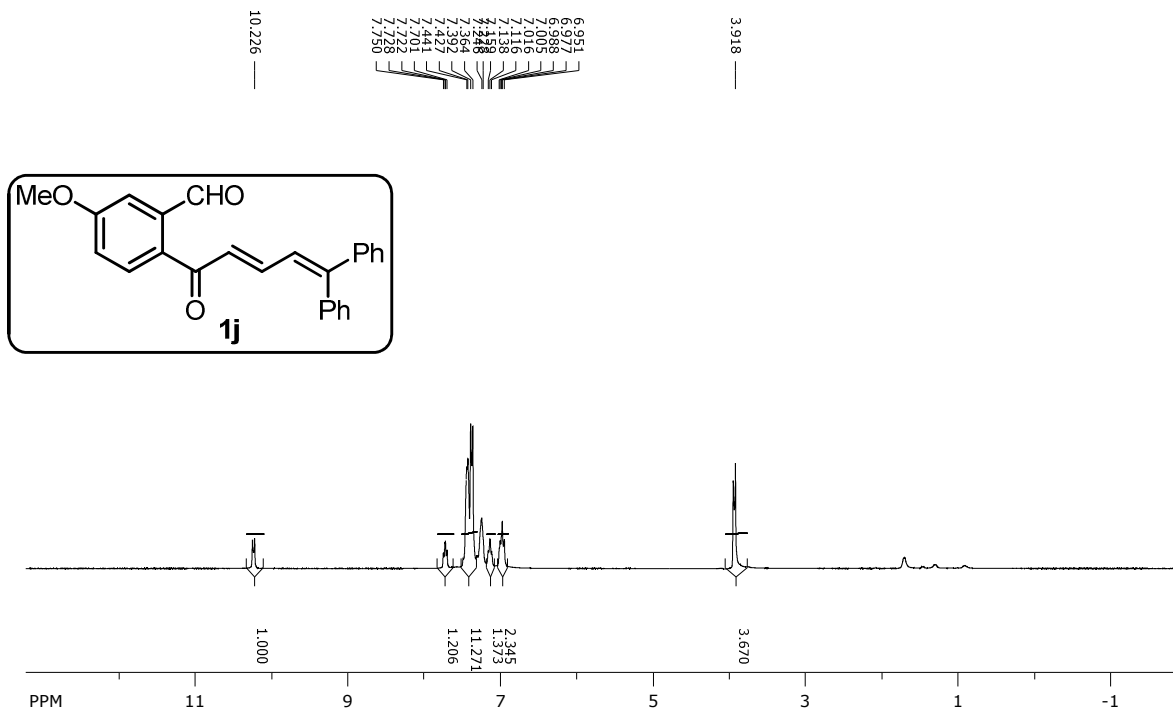

SpinWorks 4: BS 06 610  
C13CPD256 CDCI3 /opt/topspin3.5pl2/nmrdata nmrsu 35

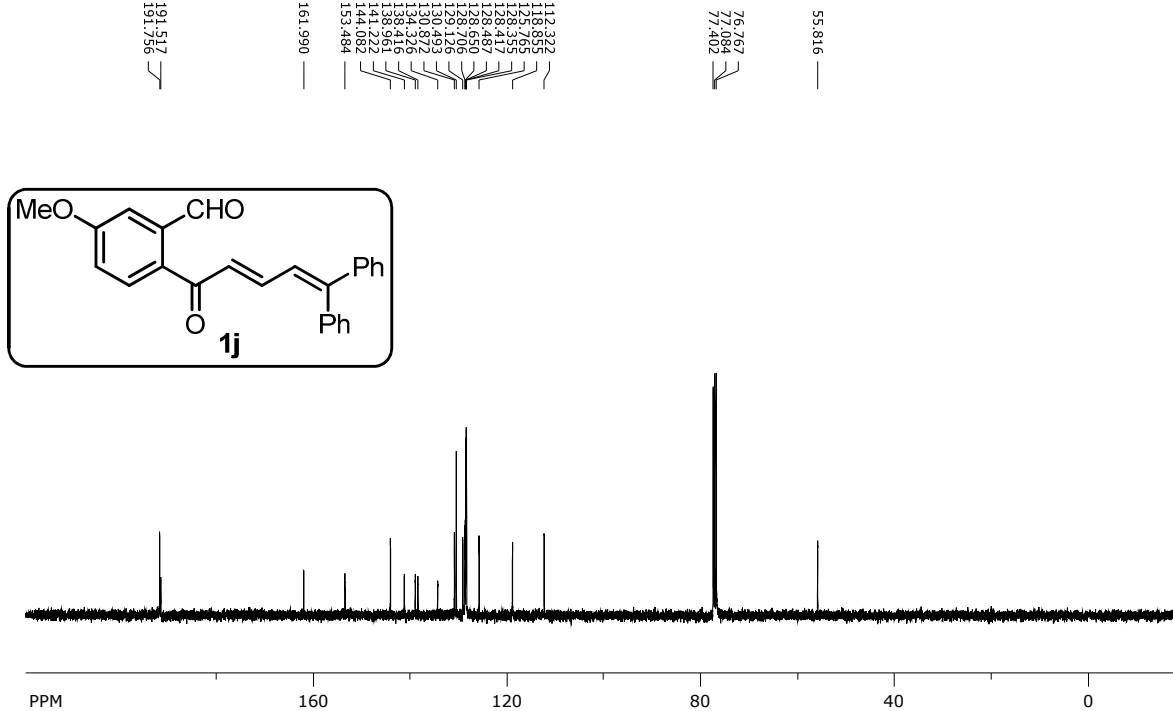

SpinWorks 4: BS 06 615  
 PROTON DMSO /opt/topspin3.5pl2/nmrdata nmrsu 43

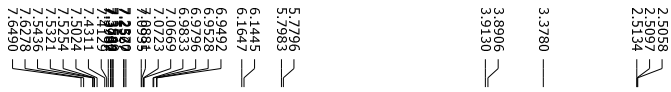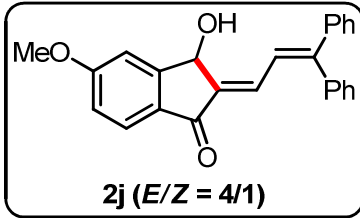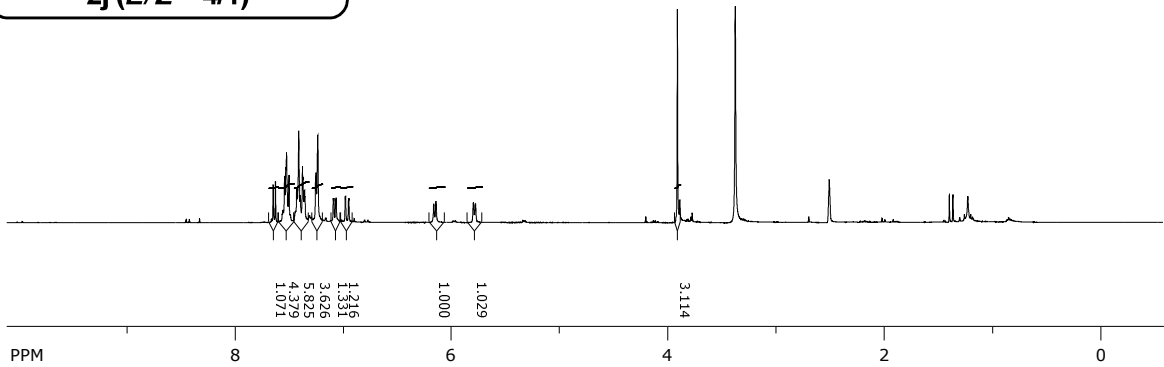

SpinWorks 4: BS 06 615  
 C13CPD256 DMSO /opt/topspin3.5pl2/nmrdata nmrsu 43

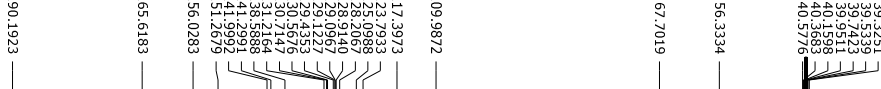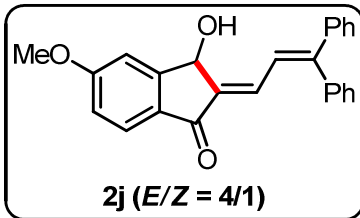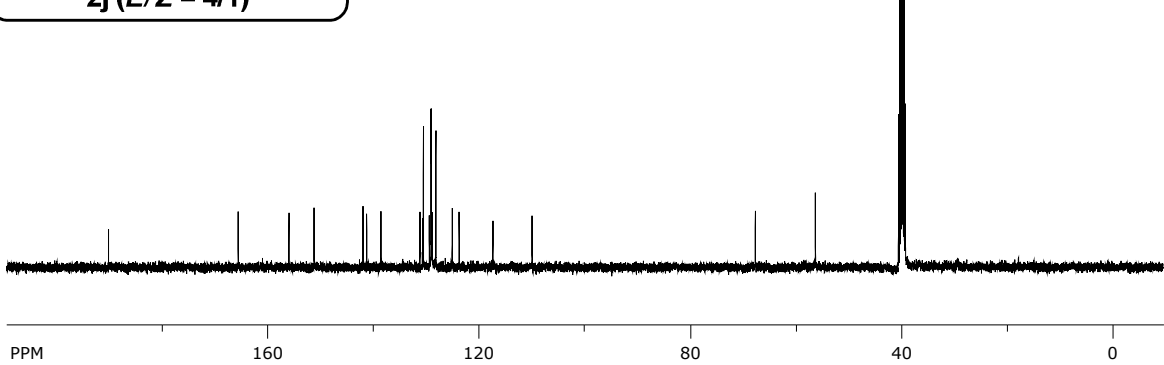

SpinWorks 4: BS 06 210  
PROTON CDCl3 /opt/topspin3.5pl2/nmrdata nmrsu 12

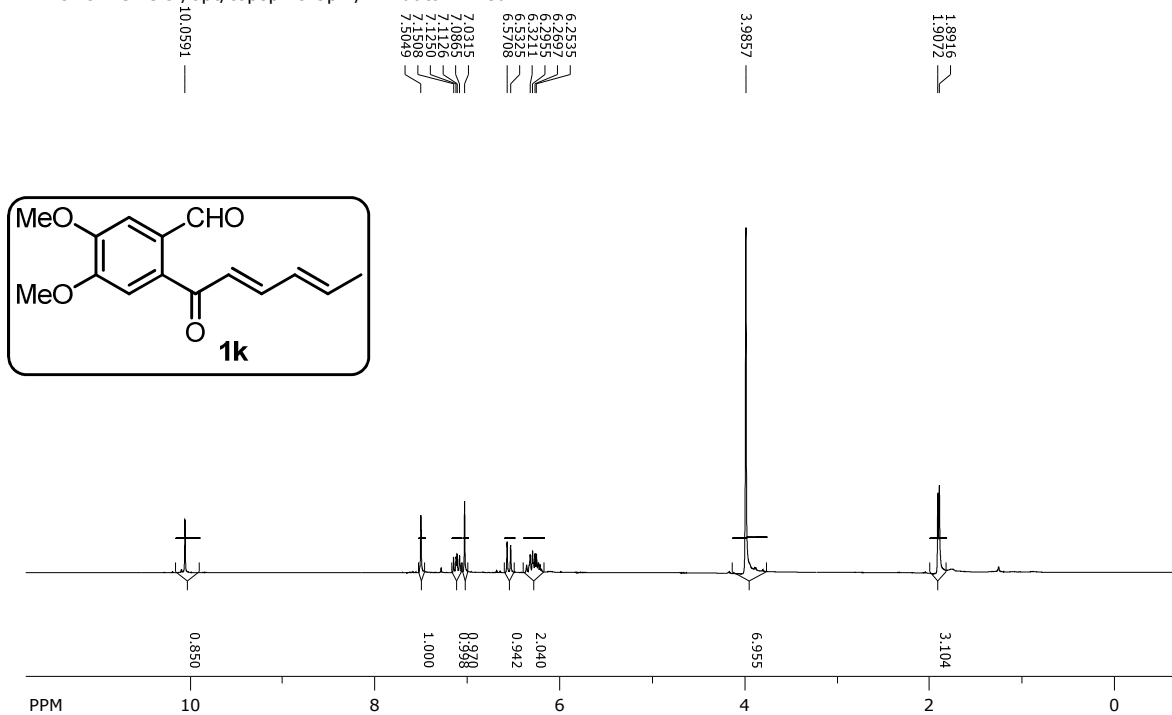

SpinWorks 4: BS 06 210  
C13CPD256 CDCl3 /opt/topspin3.5pl2/nmrdata nmrsu 12

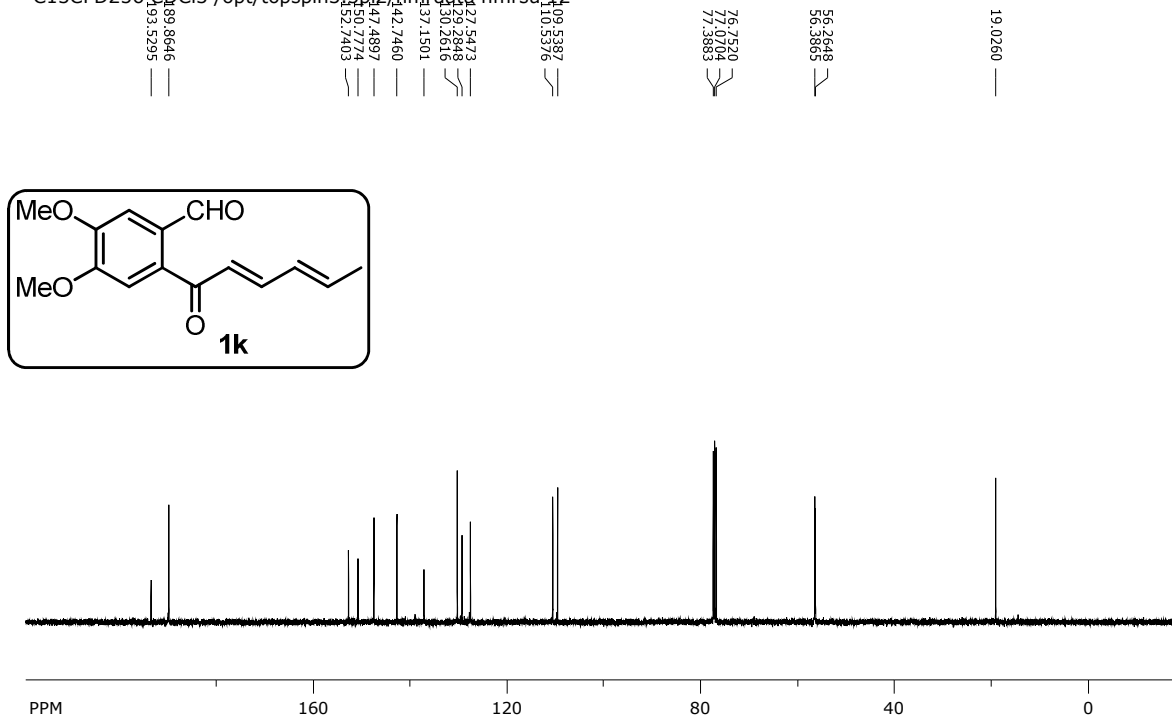

SpinWorks 4: BS 06 215  
 PROTON CDCI3 /opt/topspin3.5pl2/nmrdata nmrsu 13

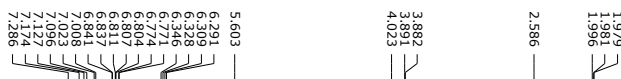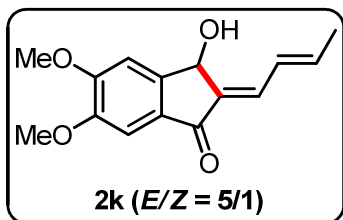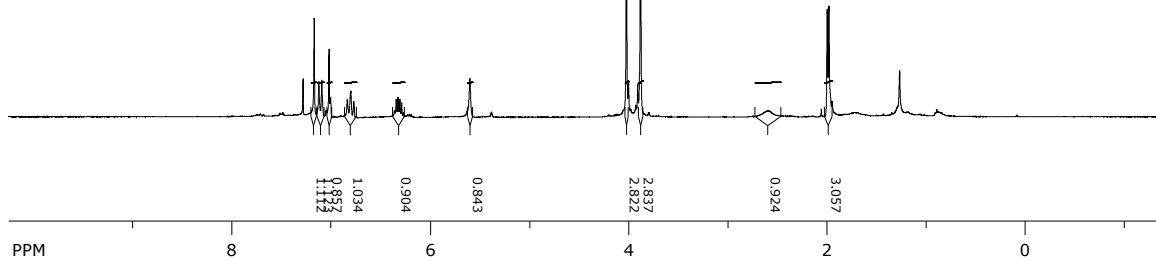

SpinWorks 4: BS 06 215  
 C13CPD256 CDCI3 /opt/topspin3.5pl2/nmrdata nmrsu 13

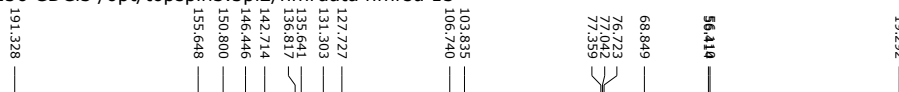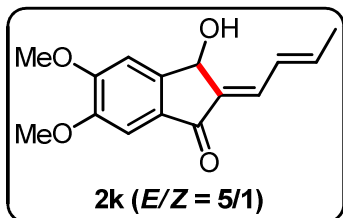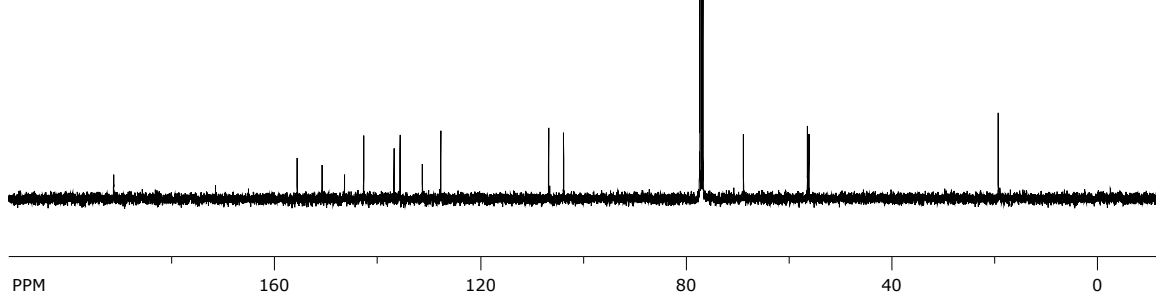

SpinWorks 4: BS-06-523

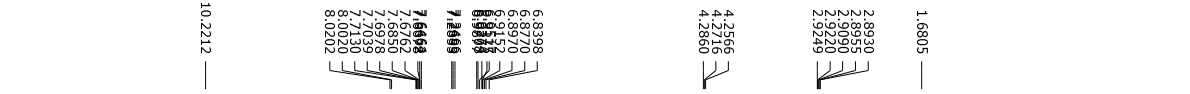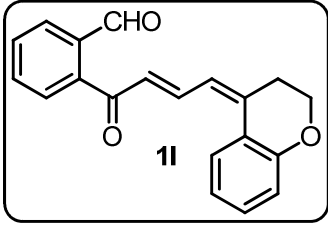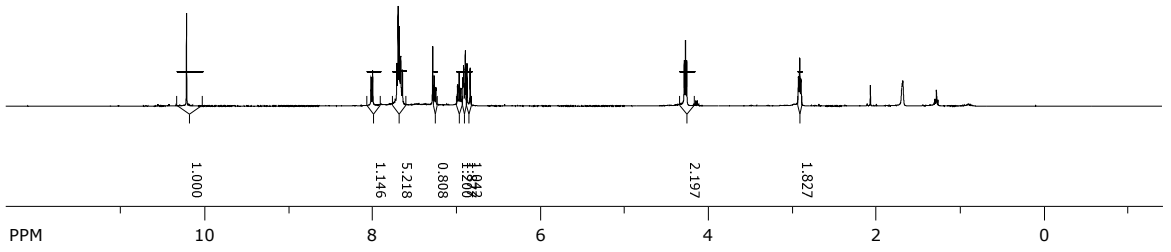

SpinWorks 4: BS 06 523

C13CPD CDCl3 /opt/topspin3.5p2/nmrdata/nmrsu\_56

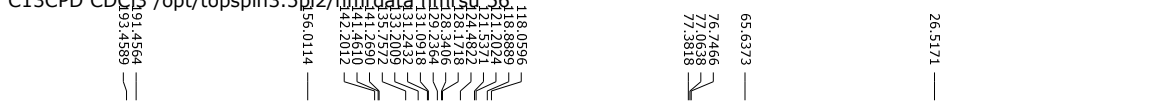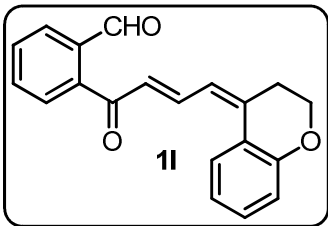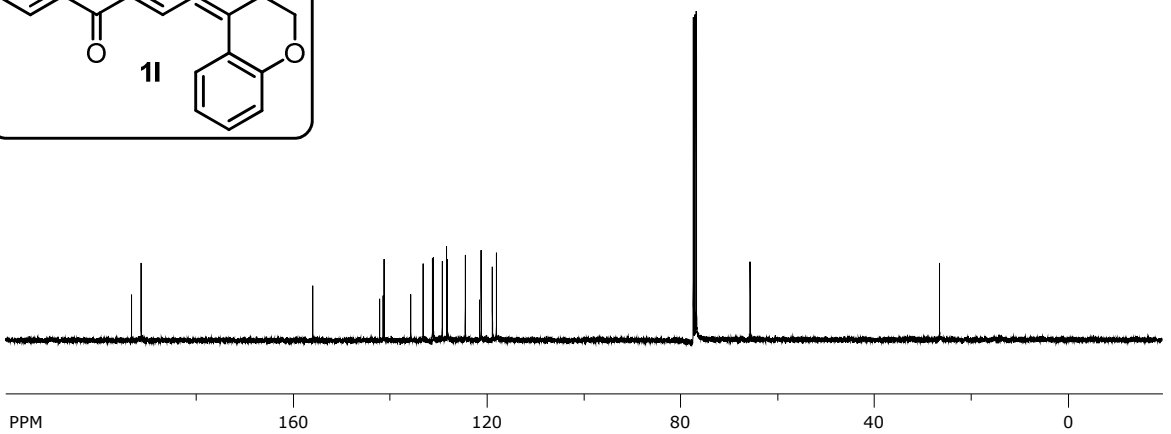

SpinWorks 4: BS-06-522-re

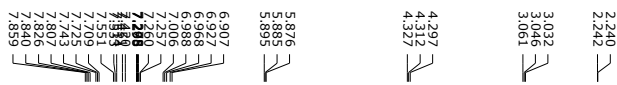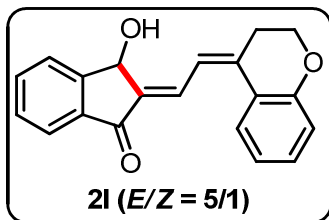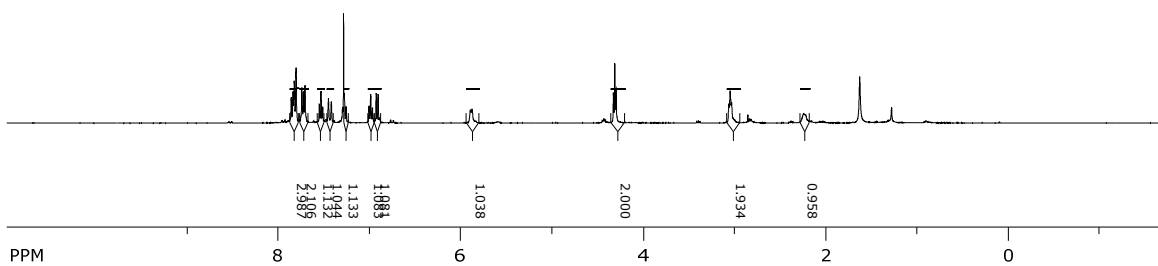

SpinWorks 4: BS 06 522  
C13CPD.CDCI3 /opt/topspin3.5p12/nmrdata/nmr5\_31

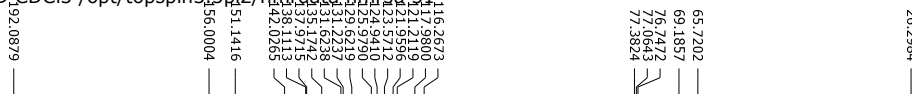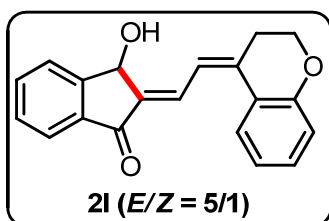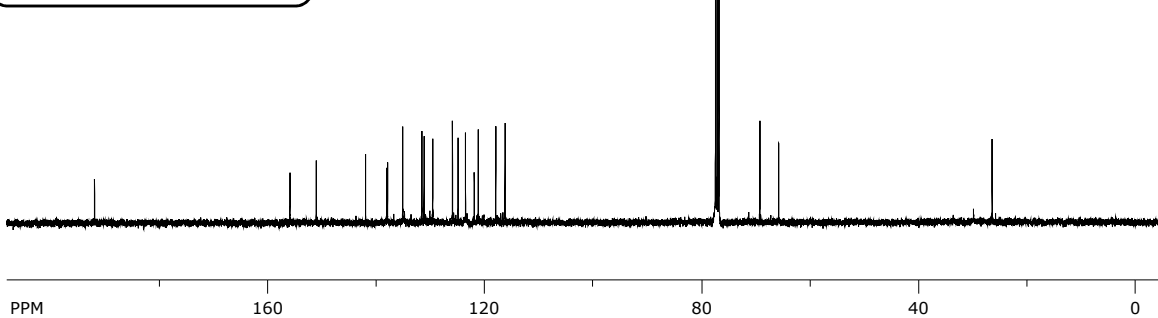

SpinWorks 4: BS 06 197  
 PROTON CDCI3 /opt/topspin3.5pl2/nmrdata nmrsu 48

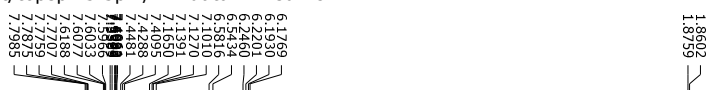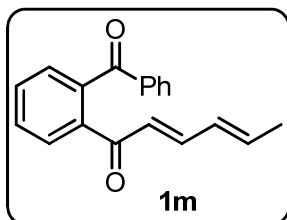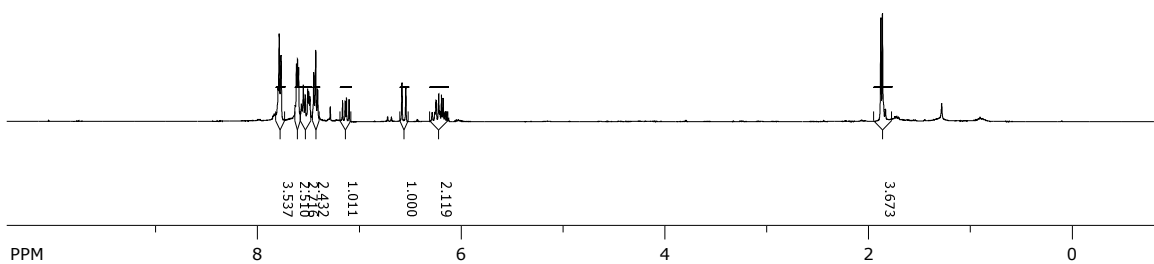

SpinWorks 4: BS 06 197  
 C13CPD256 CDCI3 /opt/topspin3.5pl2/nmrdata nmrsu 48

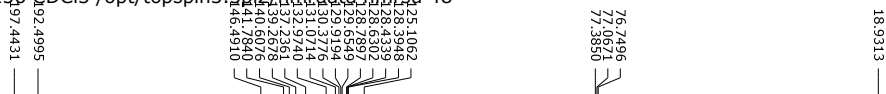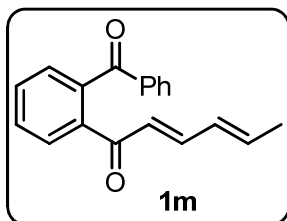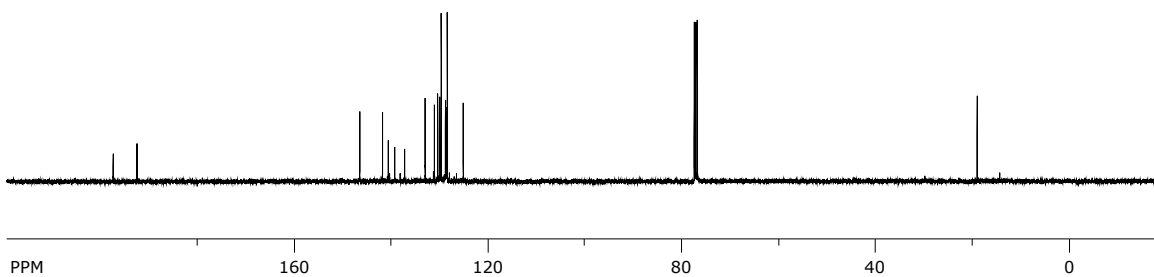

SpinWorks 4: bs-07-70

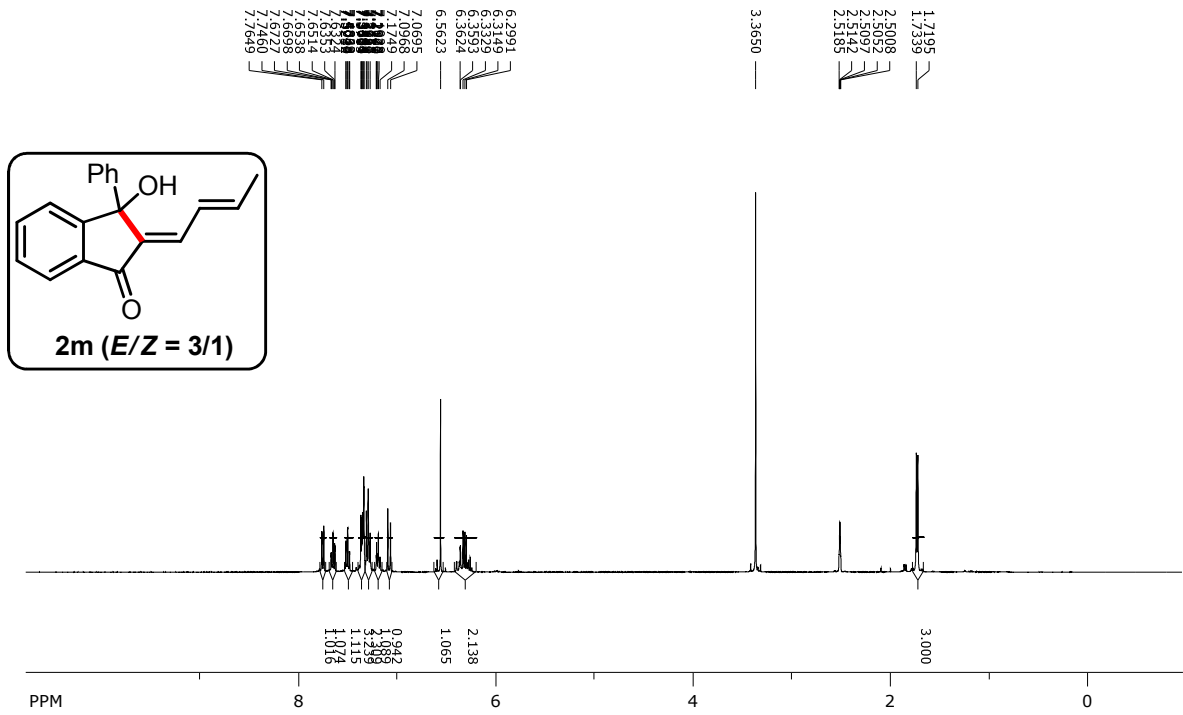

SpinWorks 4: BS 07 70  
C13CPD DMSO /opt/topspin3.5pl2/nmrdata nmrsu 14

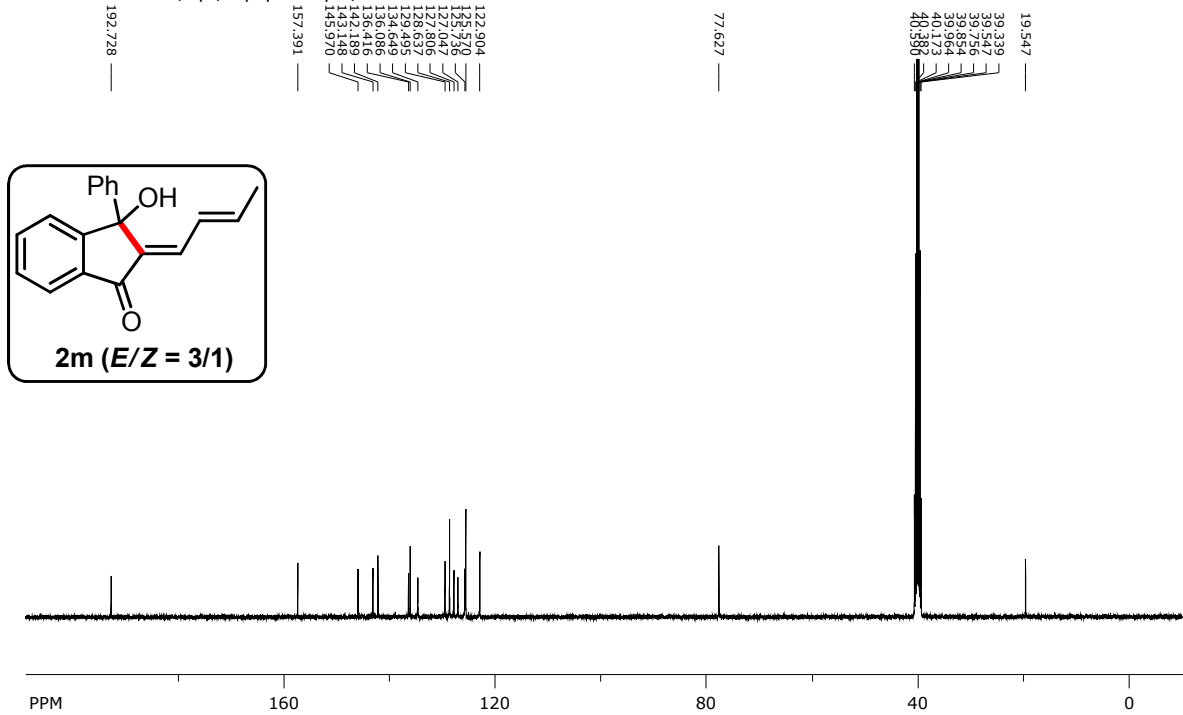



SpinWorks 4: BS-06-597

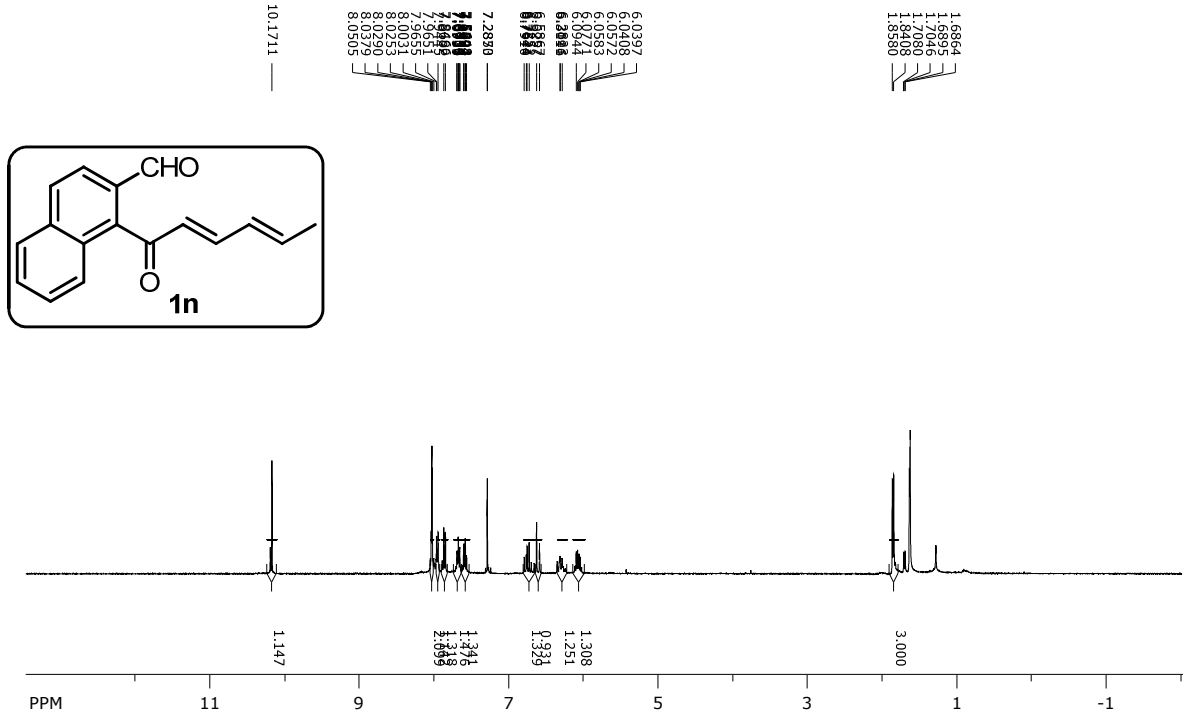

SpinWorks 4: BS 06 597  
 C13CPD CDCl<sub>3</sub> /opt/topspin3.5pl2/nmrdata/nmr50\_32

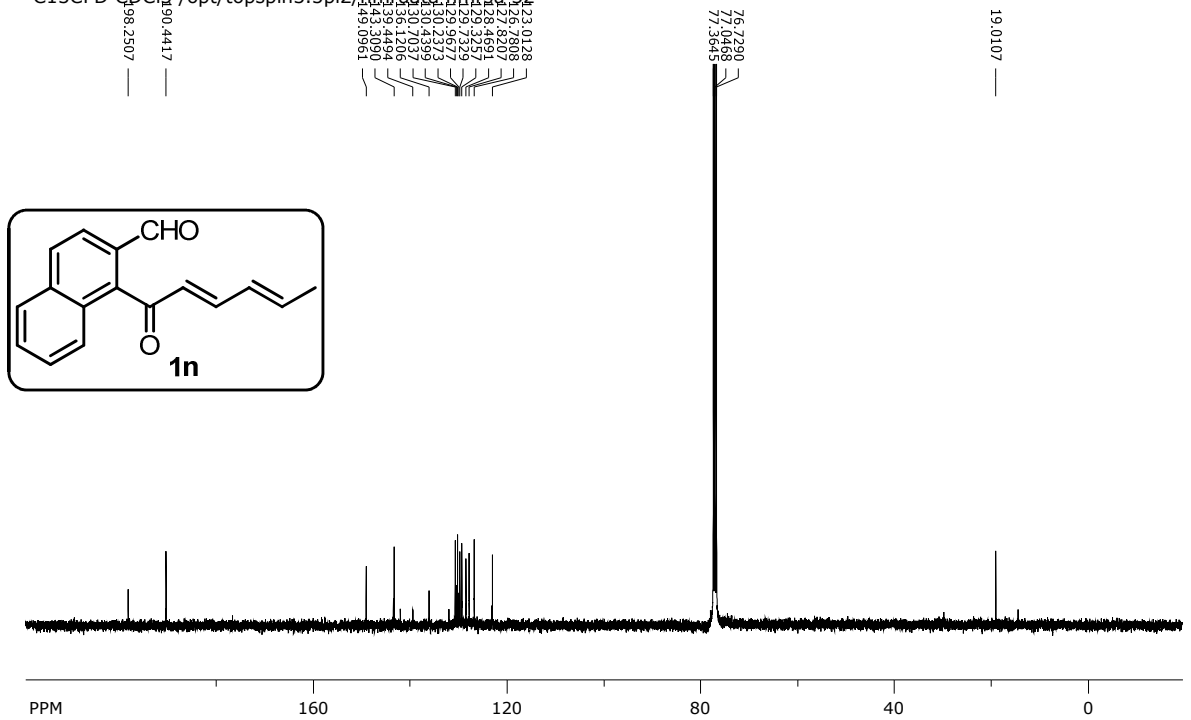

SpinWorks 4: BS 06 600  
 PROTON DMSO /opt/topspin3.5pl2/nmrdata nmrsu 22

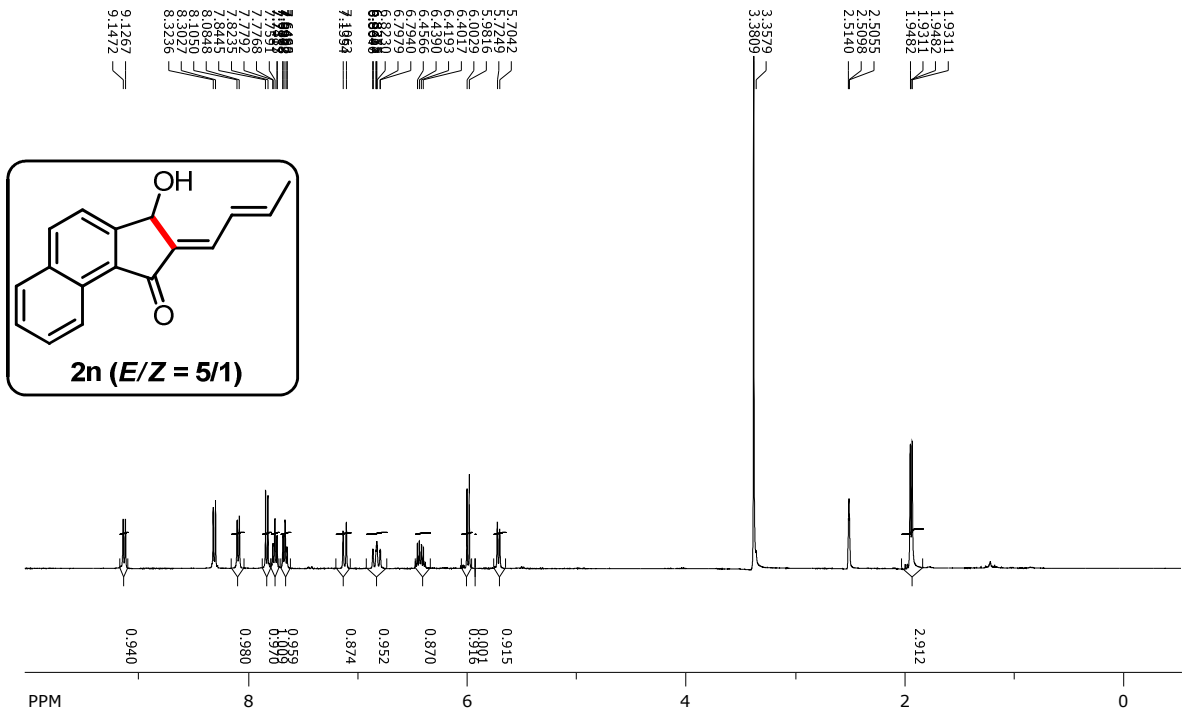

SpinWorks 4: BS 06 600  
 C13CPD256 DMSO /opt/topspin3.5pl2/nmrdata nmrsu 22

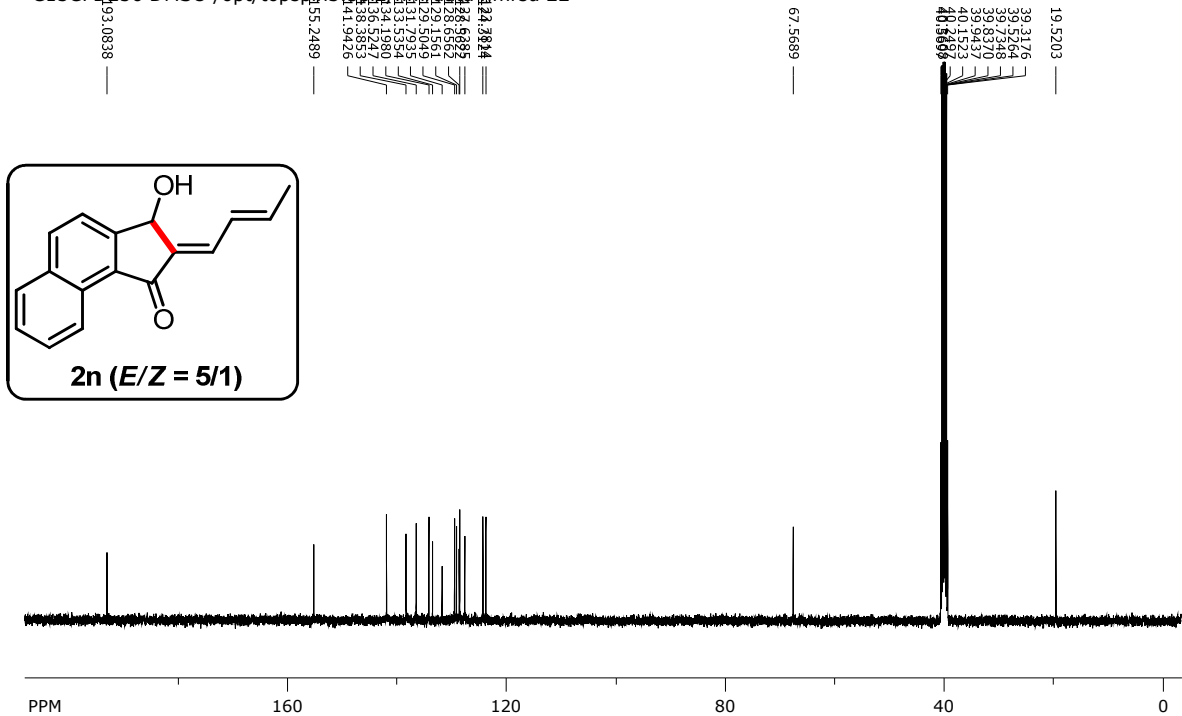

SpinWorks 4: bs-06-620

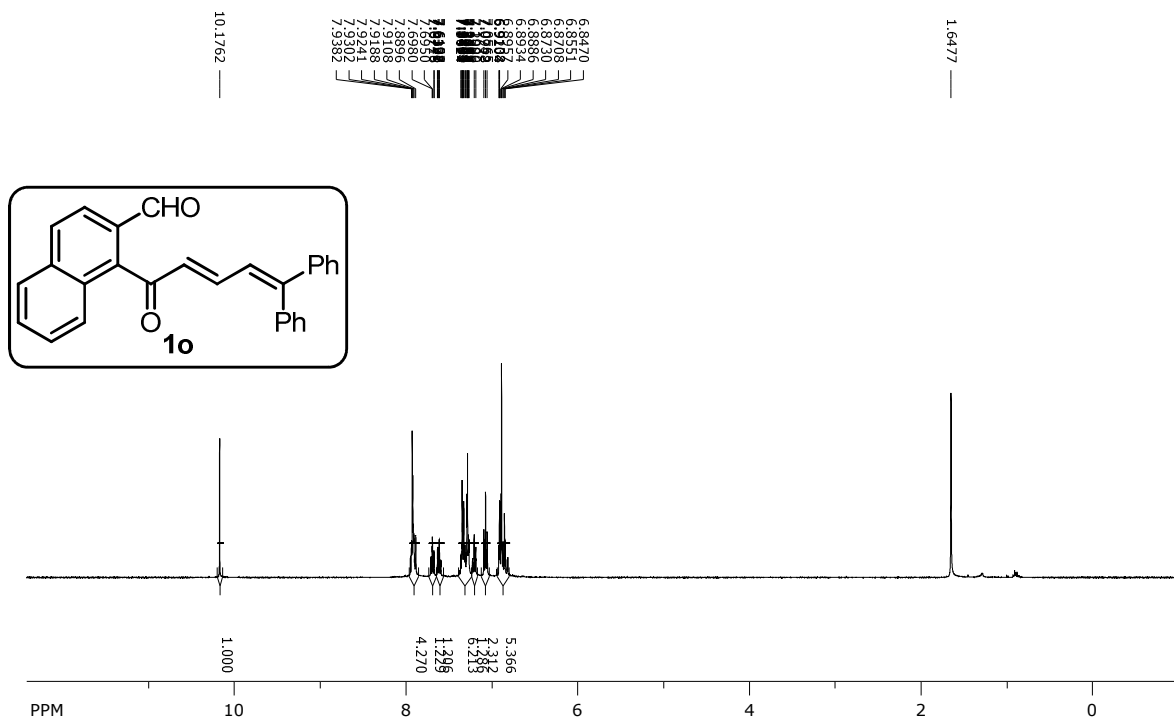

SpinWorks 4: BS 06 620  
 C13CPD CDCl<sub>3</sub> /opt/topspin3.5p12/nmrdata/nmr\_su\_18

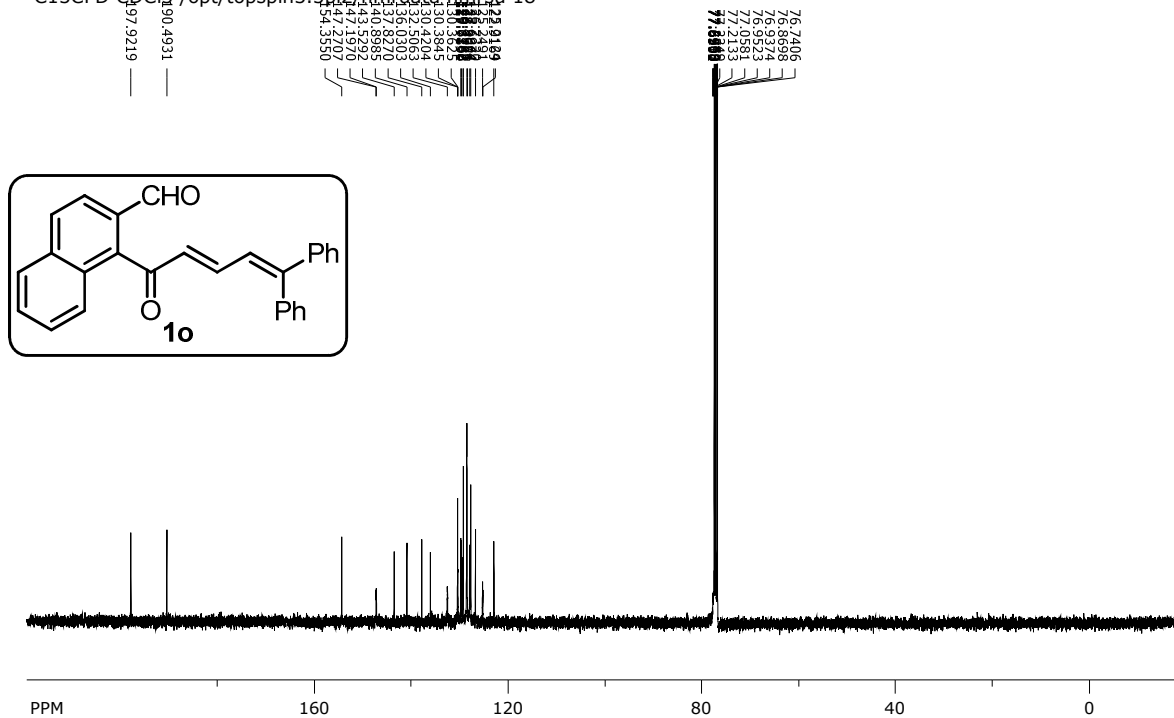



SpinWorks 4: BS-06-667

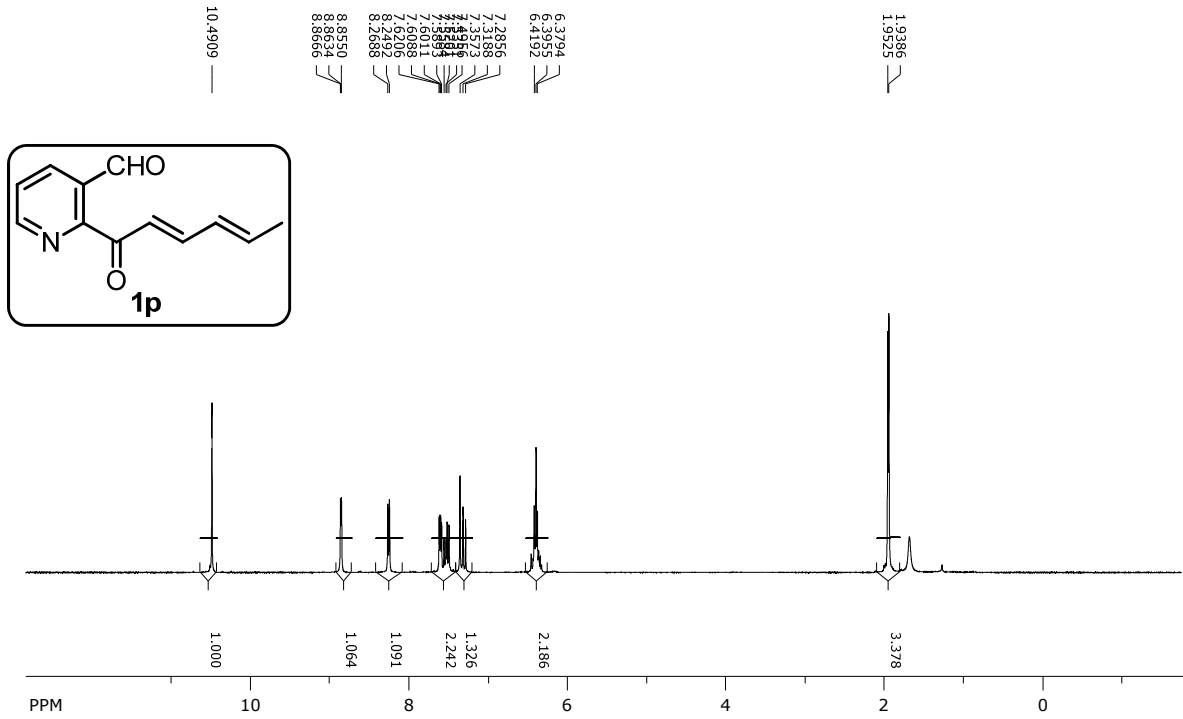

SpinWorks 4: BS 06 667  
C13CPD256\_CDCl3 /opt/topspin3.5pl2/nmrdata/nmrsu 9

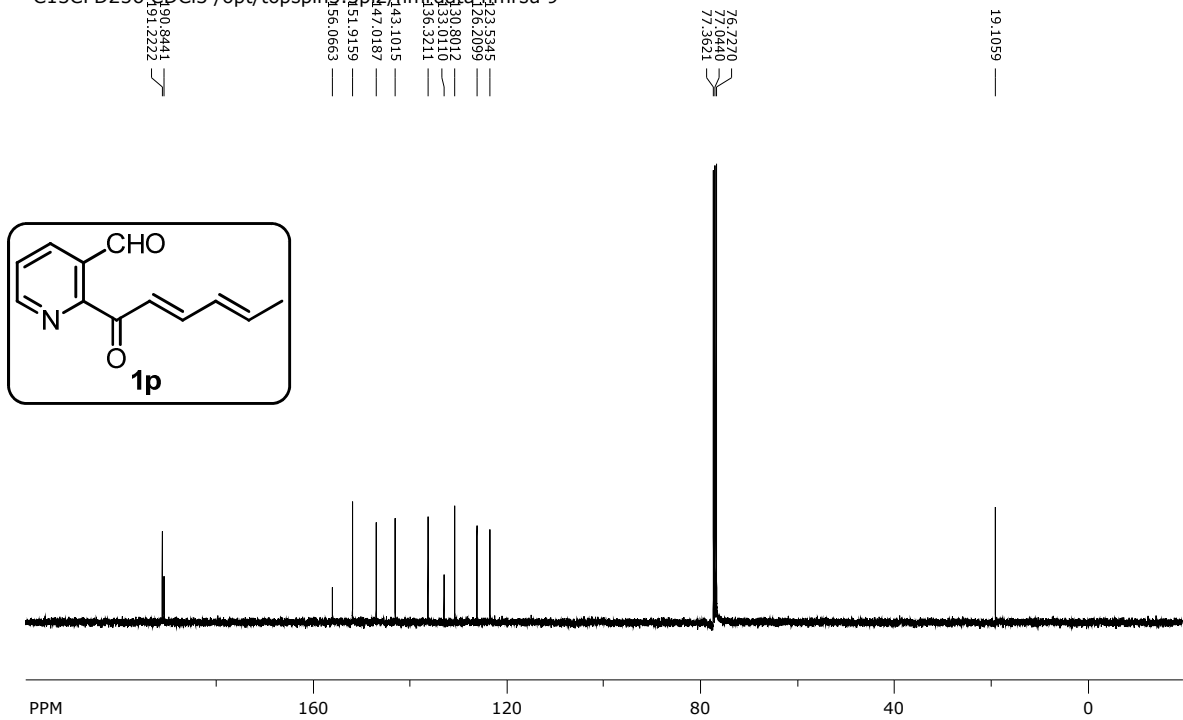

SpinWorks 4: BS-06-697  
 PROTON DMSO /opt/topspin3.5pl2/nmrdata nmrsu 45

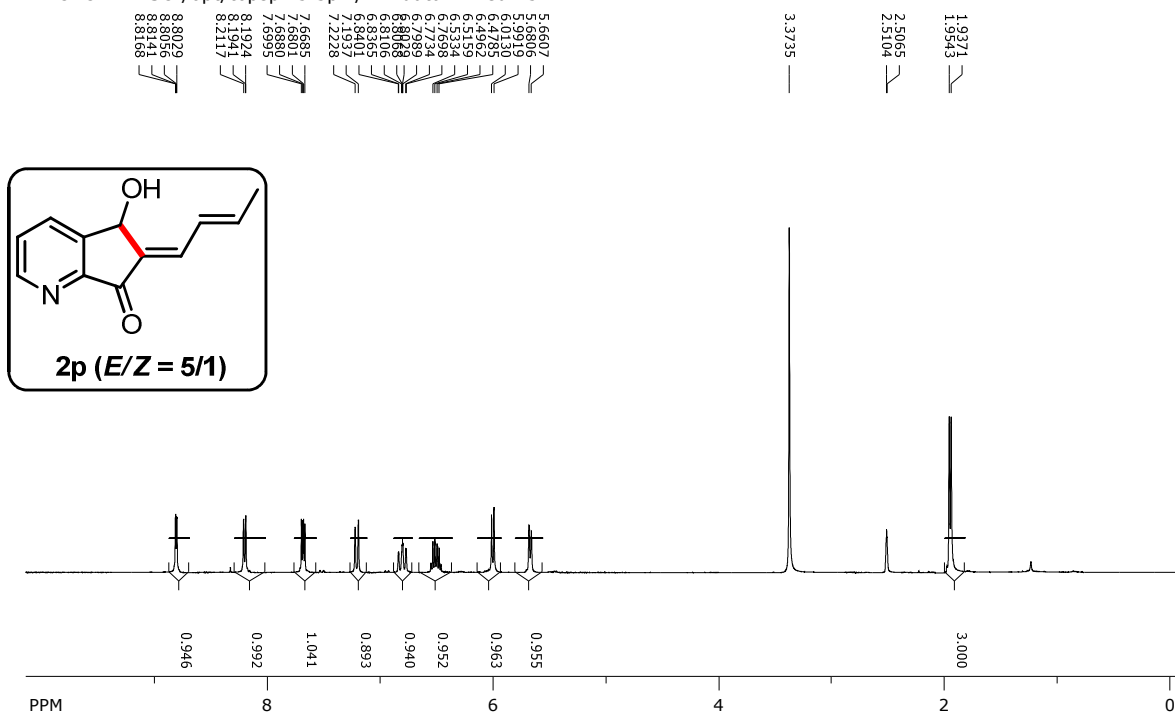

SpinWorks 4: BS-06-697  
 C13CPD256 DMSO /opt/topspin3.5pl2/nmrdata nmrsu 45

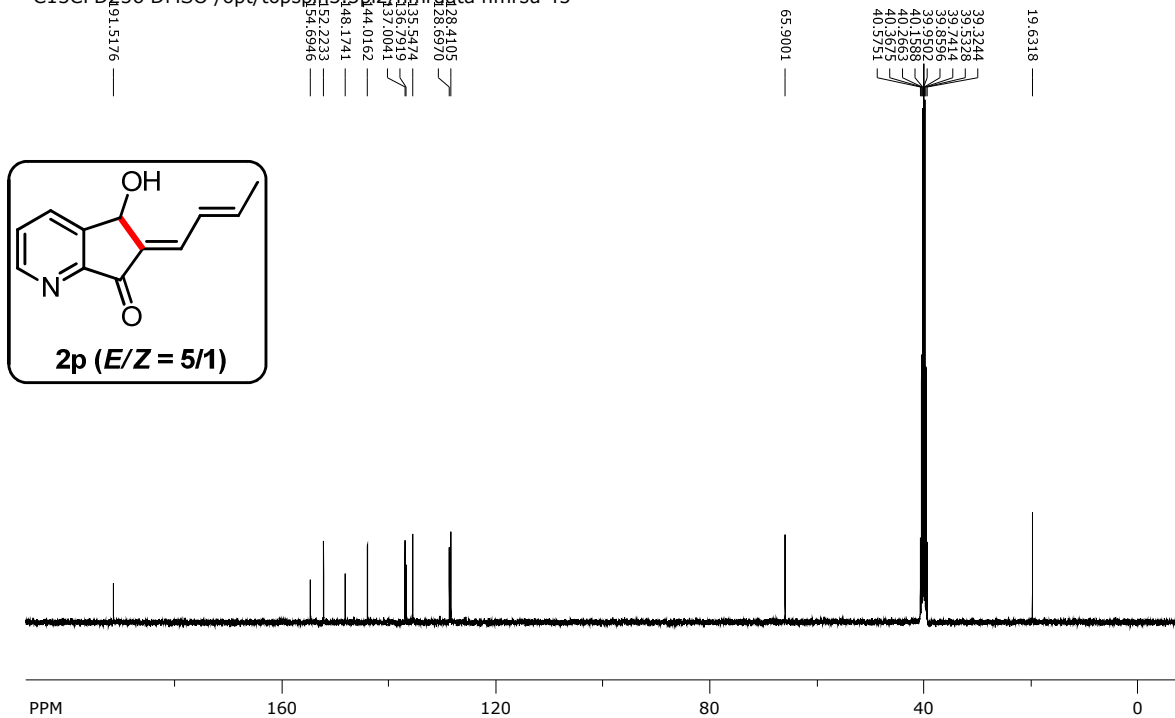

SpinWorks 4: BS 06 223 RE  
PROTON CDCI3 /opt/topspin3.5pl2/nmrdata nmrsu 55

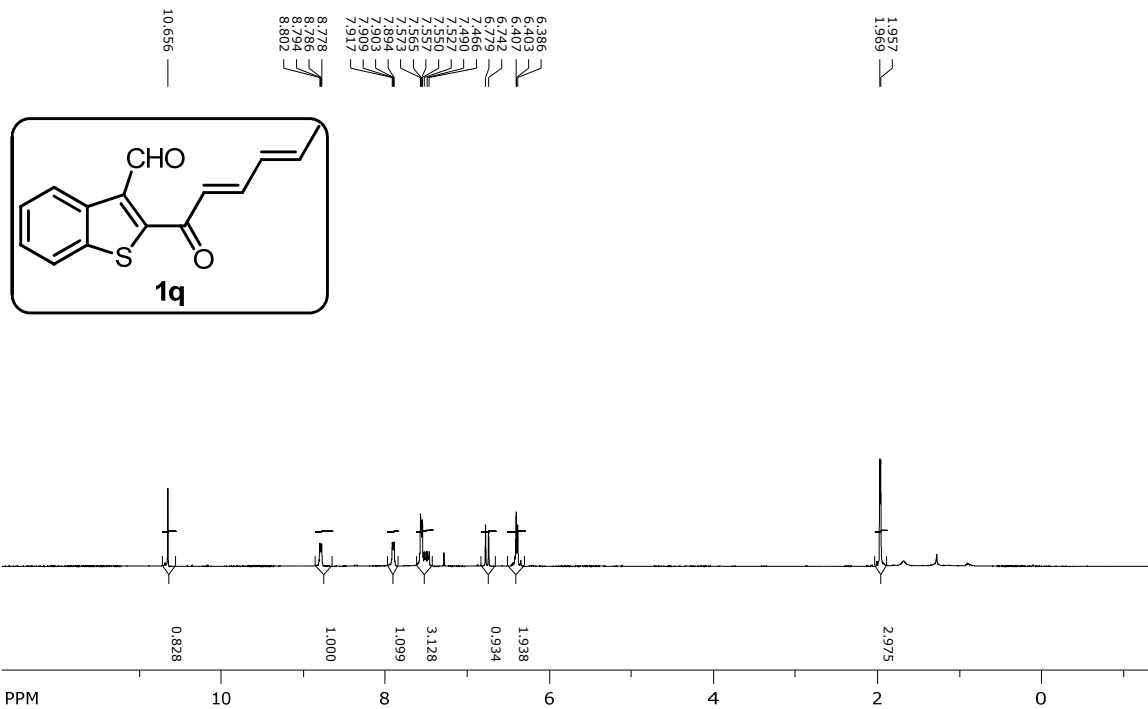

SpinWorks 4: BS 06 223  
C13CPD256 CDCI3 /opt/topspin3.5pl2/nmrdata nmrsu 52

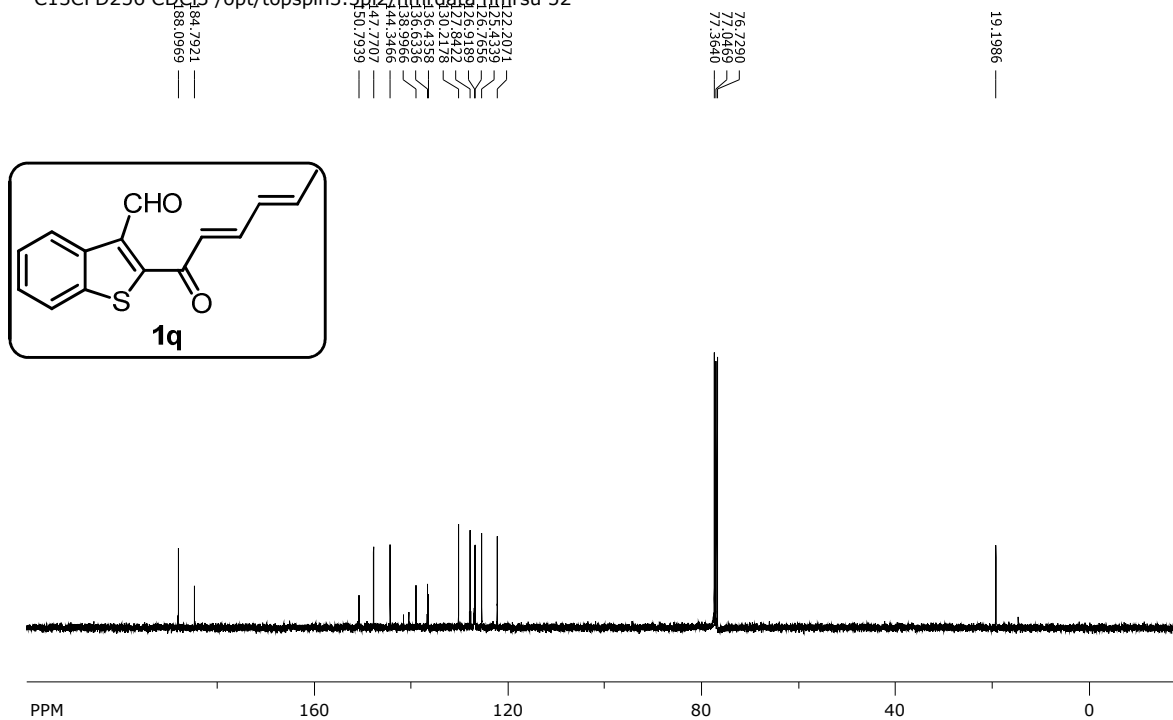

SpinWorks 4: BS 06 228  
 PROTON CDCI3 /opt/topspin3.5pl2/nmrdata nmrsu 55

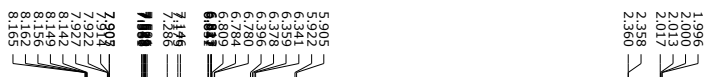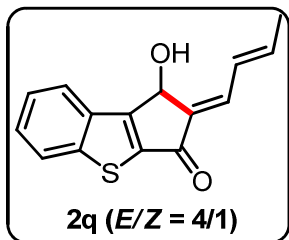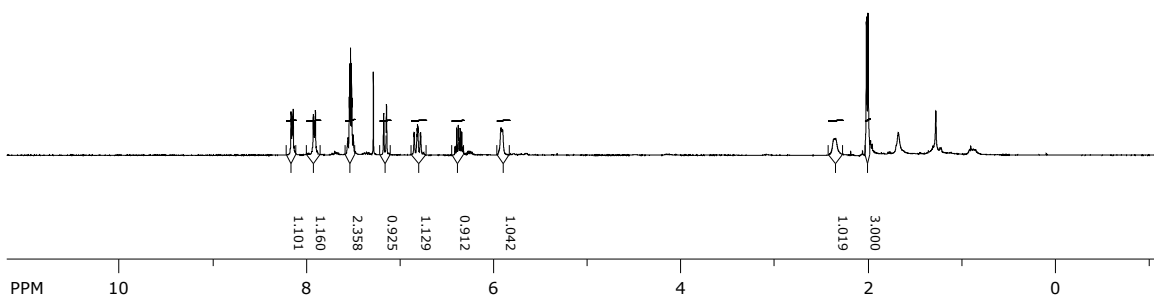

SpinWorks 4: BS 06 228  
 C13CPD256 CDCI3 /opt/topspin3.5pl2/nmrdata nmrsu 55

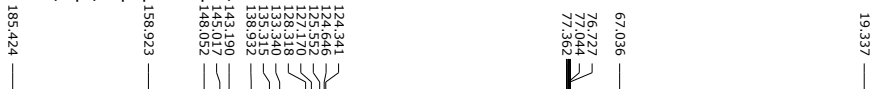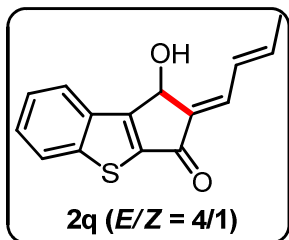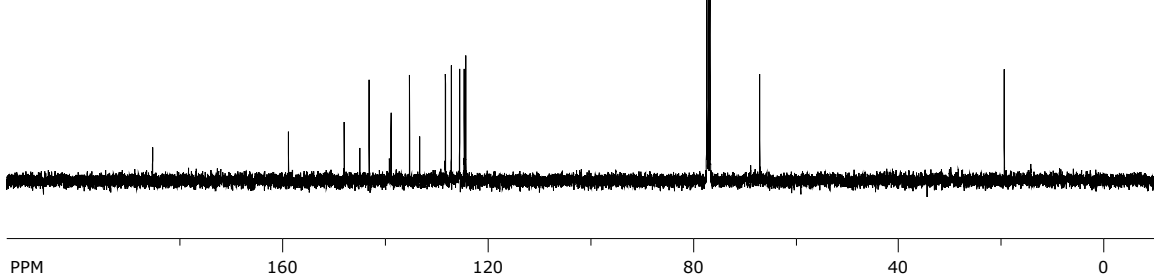



SpinWorks 4: BS-07-18

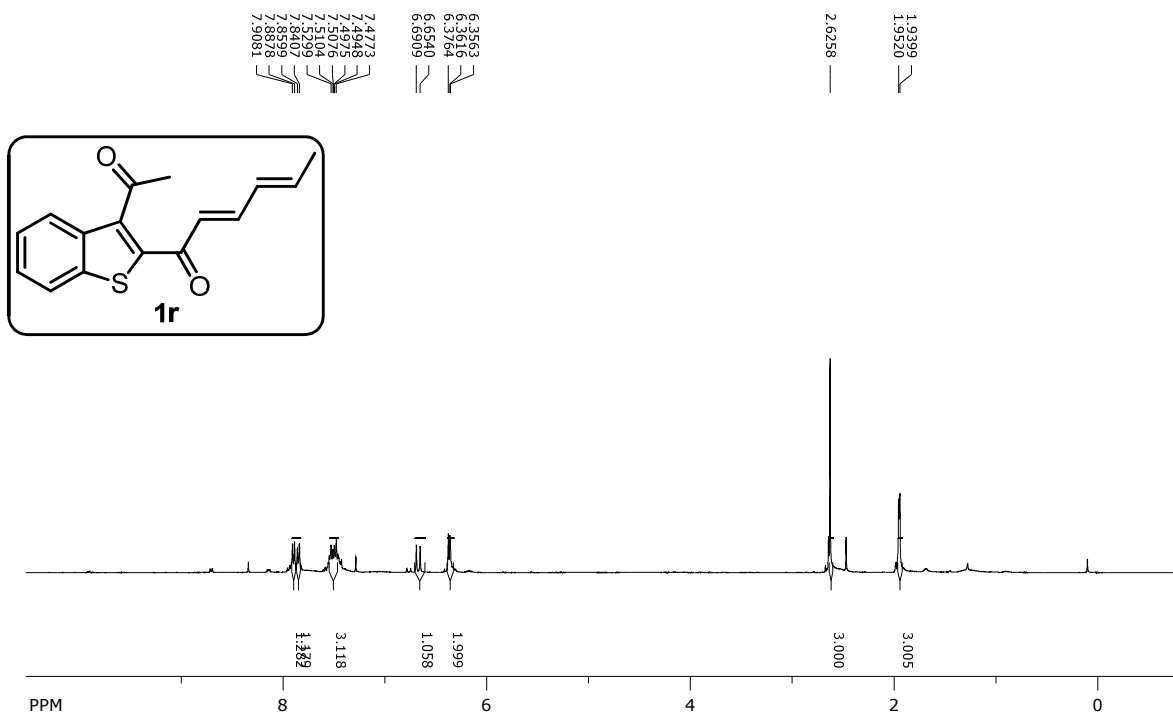

SpinWorks 4: BS 07 18  
C13CPD256 CDCl3 /opt/topspin3.5pl2/nmrdata/nmr16

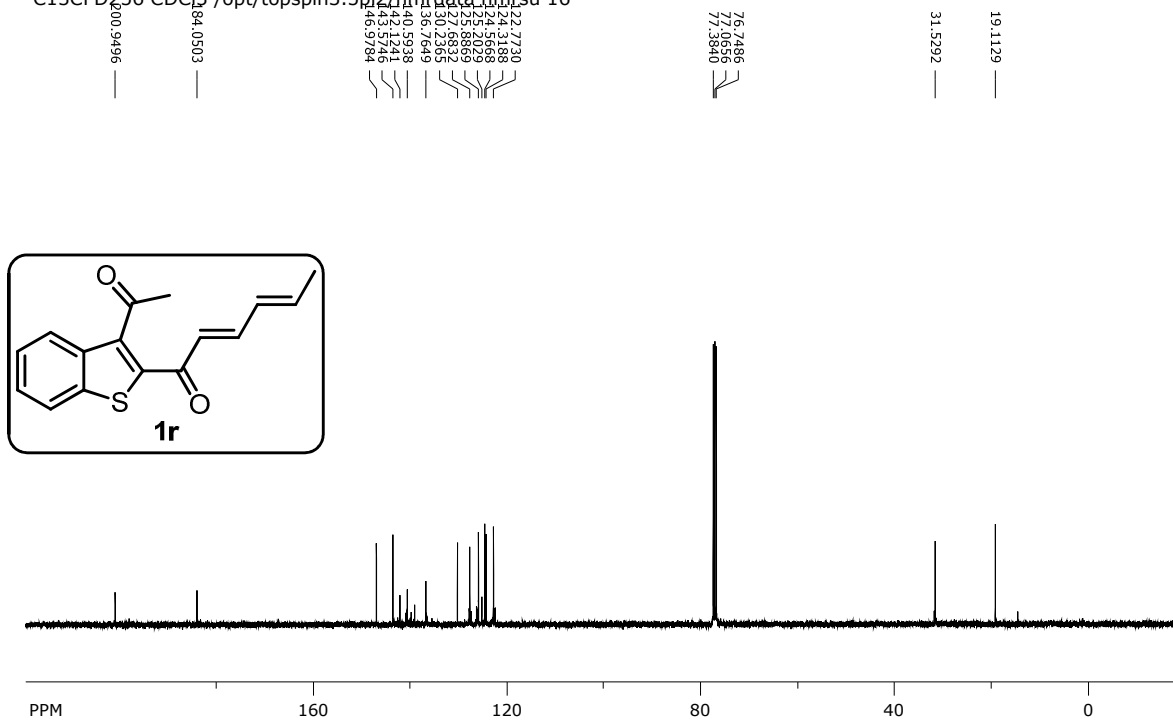

SpinWorks 4: BS-07-20-Re

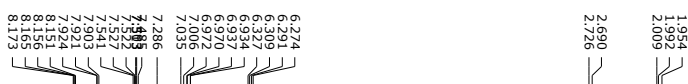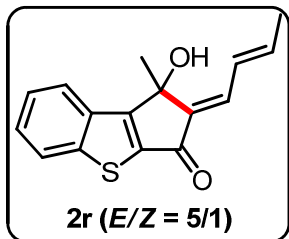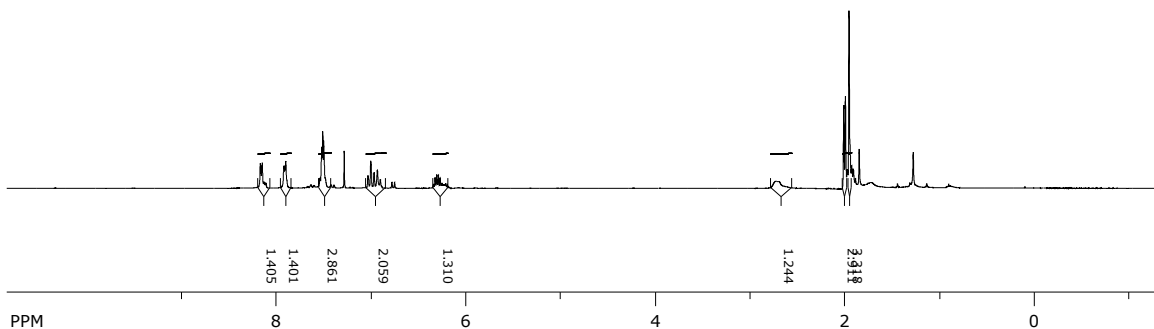

SpinWorks 4: BS 07 20 RE  
C13CPD256 CDCl3 /opt/topspin3.5pl2/nmrdata nmrsu 19

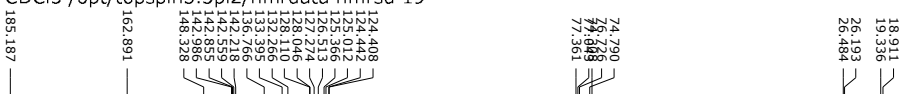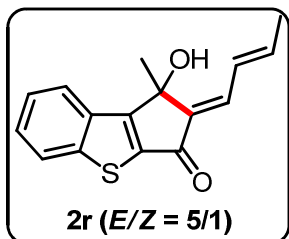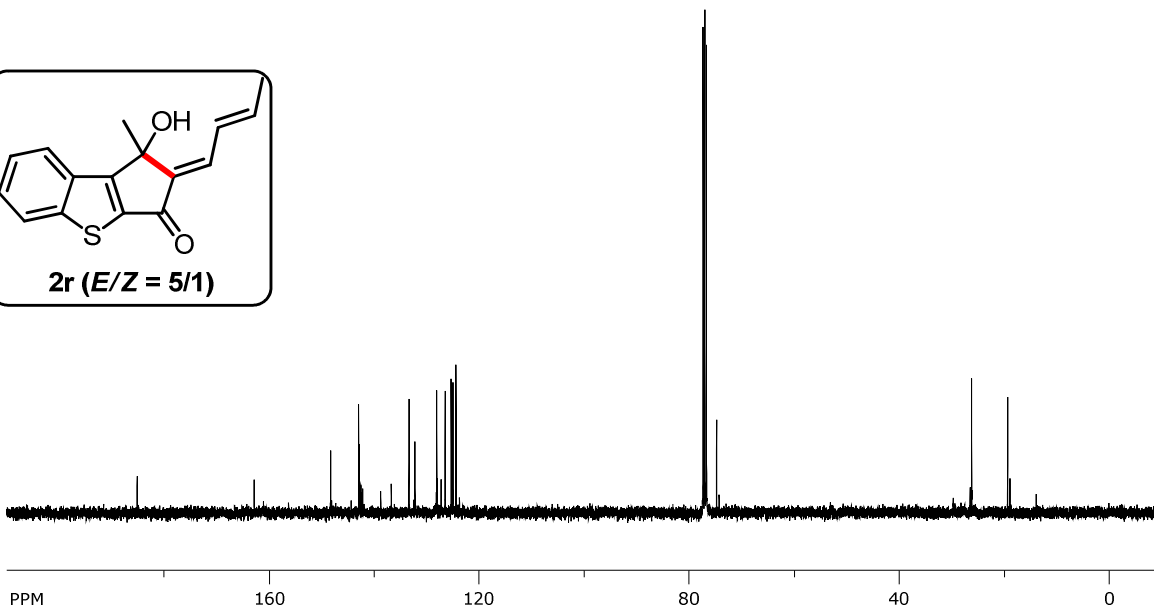

SpinWorks 4: BS 07 113  
PROTON CDCI3 /opt/topspin3.5pl2/nmrdata nmrsu 14

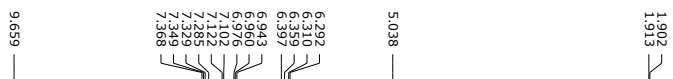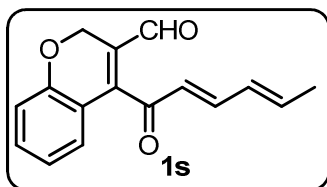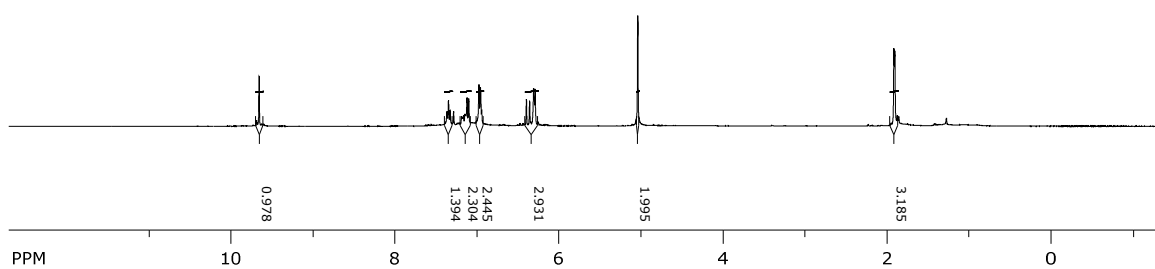

SpinWorks 4: BS 07 113  
C13CPD256 CDCI3 /opt/topspin3.5pl2/nmrdata nmrsu 14

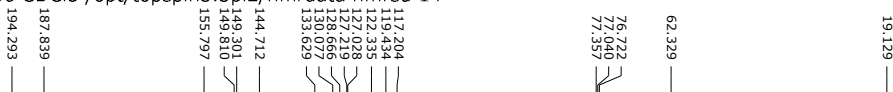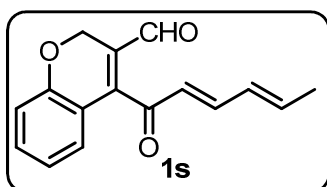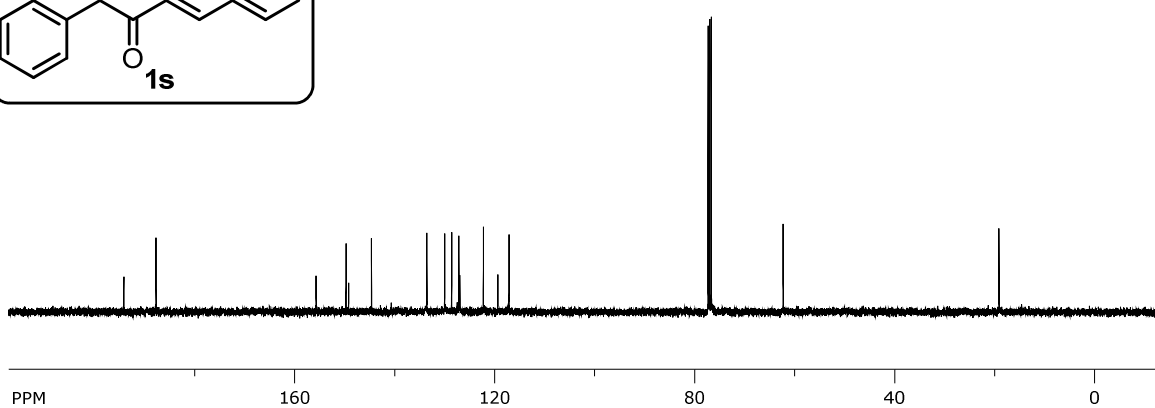

SpinWorks 4: bs 07 120

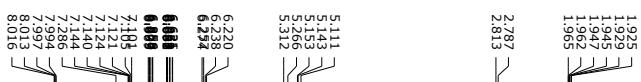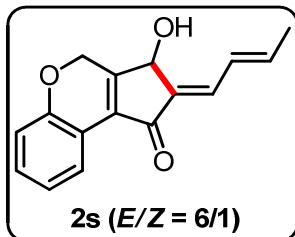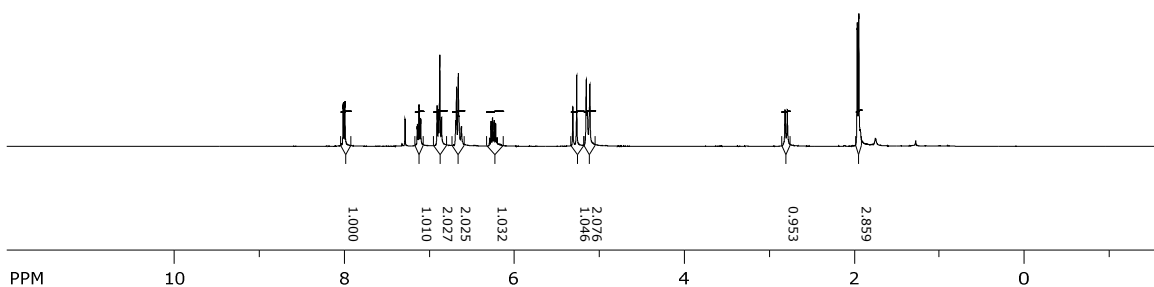

SpinWorks 4: BS 07 120  
C13CPD256 CDCl3 /opt/topspin3.5pl2/nmrdata nmrsu 43

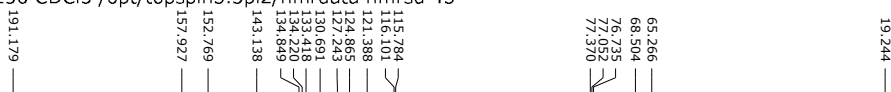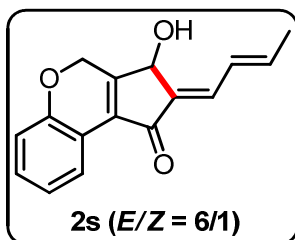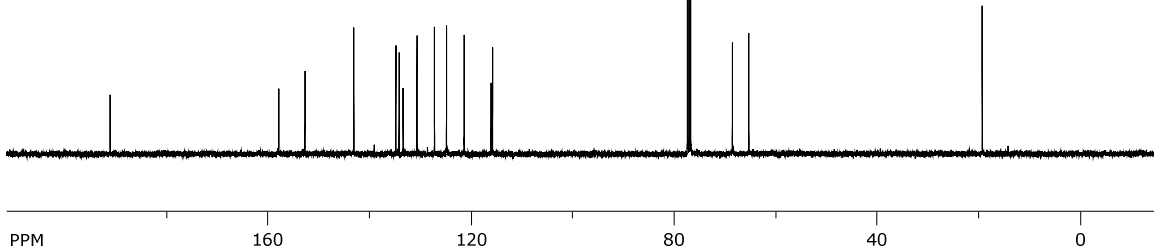

SpinWorks 4: BS-06-640

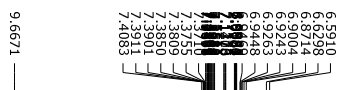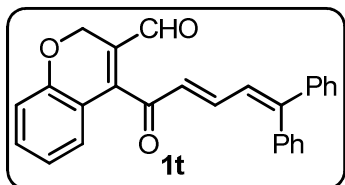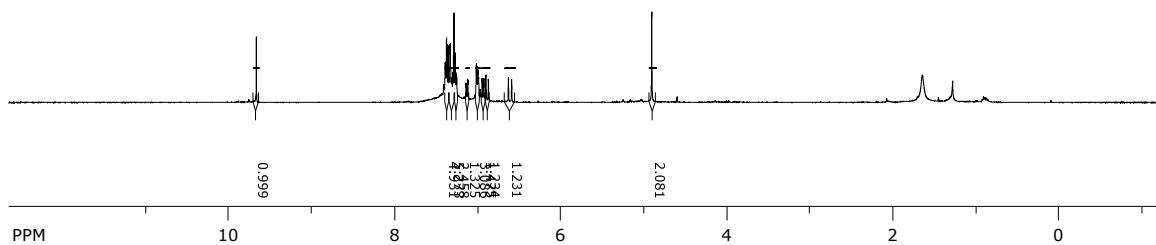

SpinWorks 4: BS 06 640

C13CPD CDC13 /opt/topspin3.5p2/nmrdata/nmrsu\_23

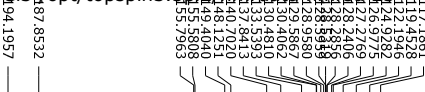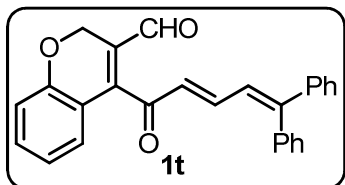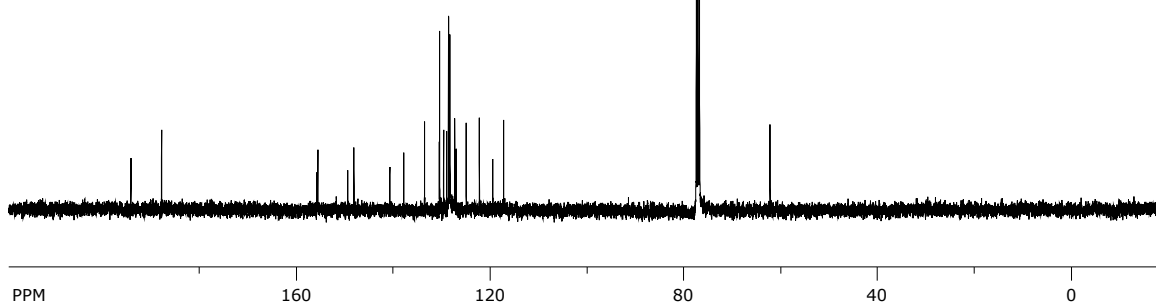



SpinWorks 4: BS-05-111  
PROTON CDCl3 /opt/topspin nmrsu 21

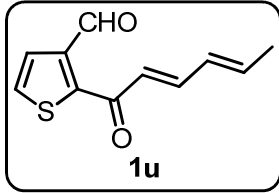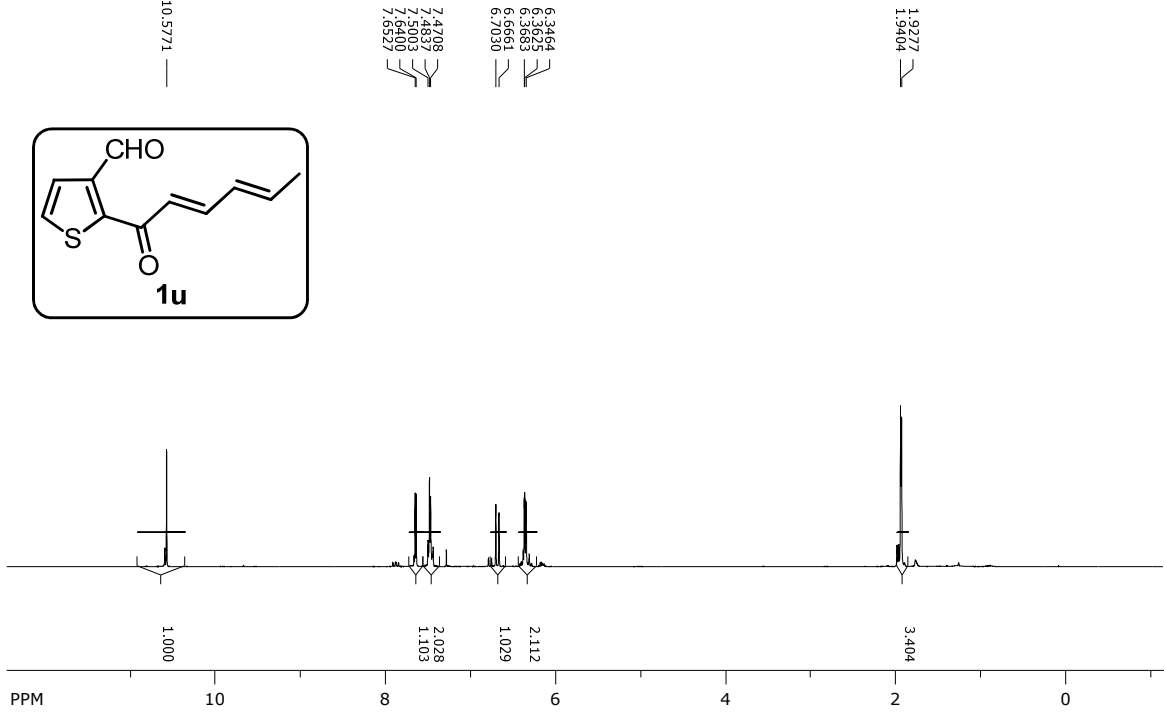

SpinWorks 3: BS 05 111  
C13CPD CDCl3 /opt/topspin nmrsu 58

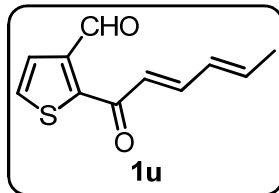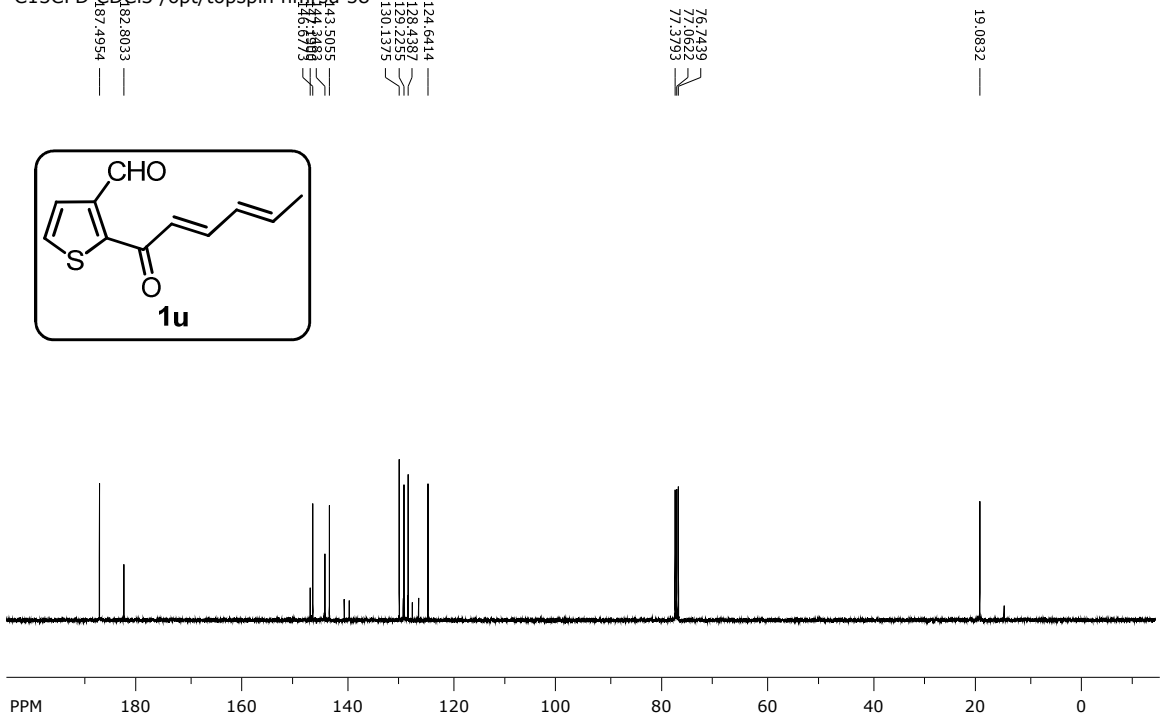

SpinWorks 4: BS 05 113  
PROTON CDCl3 /opt/topspin nmrsu 31

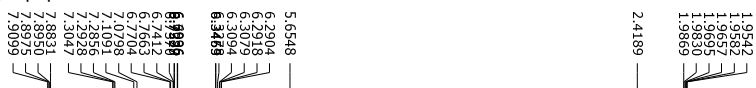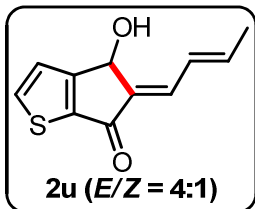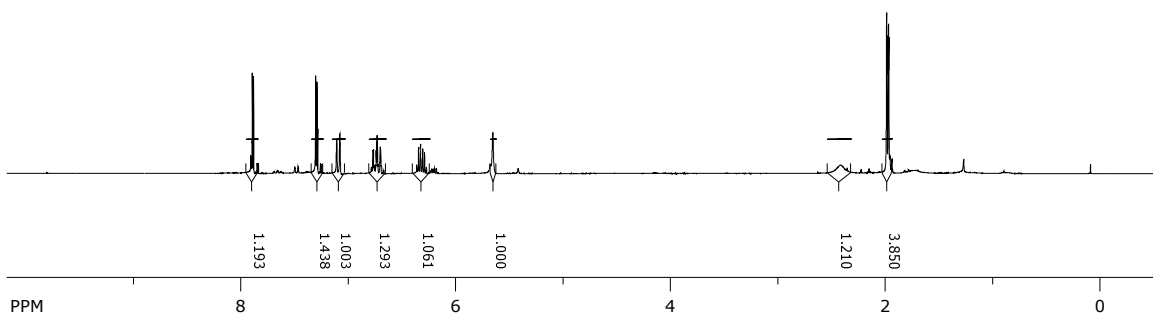

SpinWorks 3: BS 05 113  
C13CPD CDCl3 /opt/topspin nmrsu 31

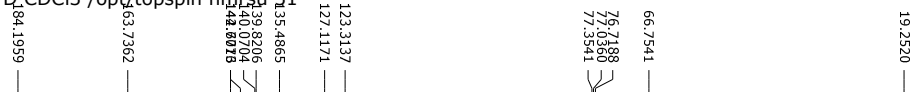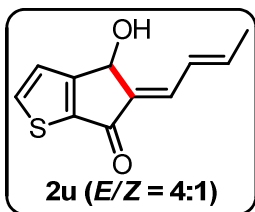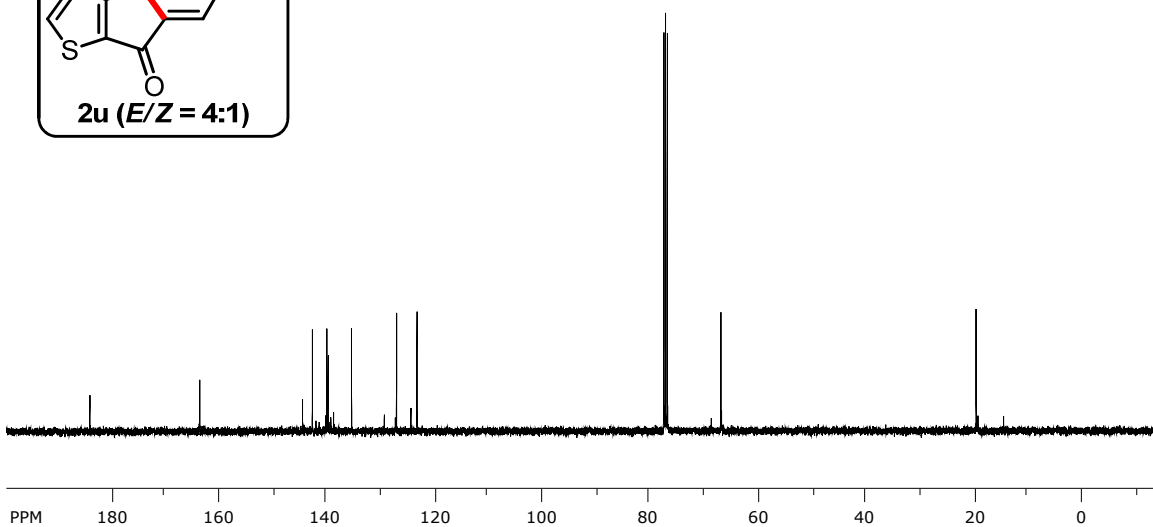



SpinWorks 4: BS-07-160

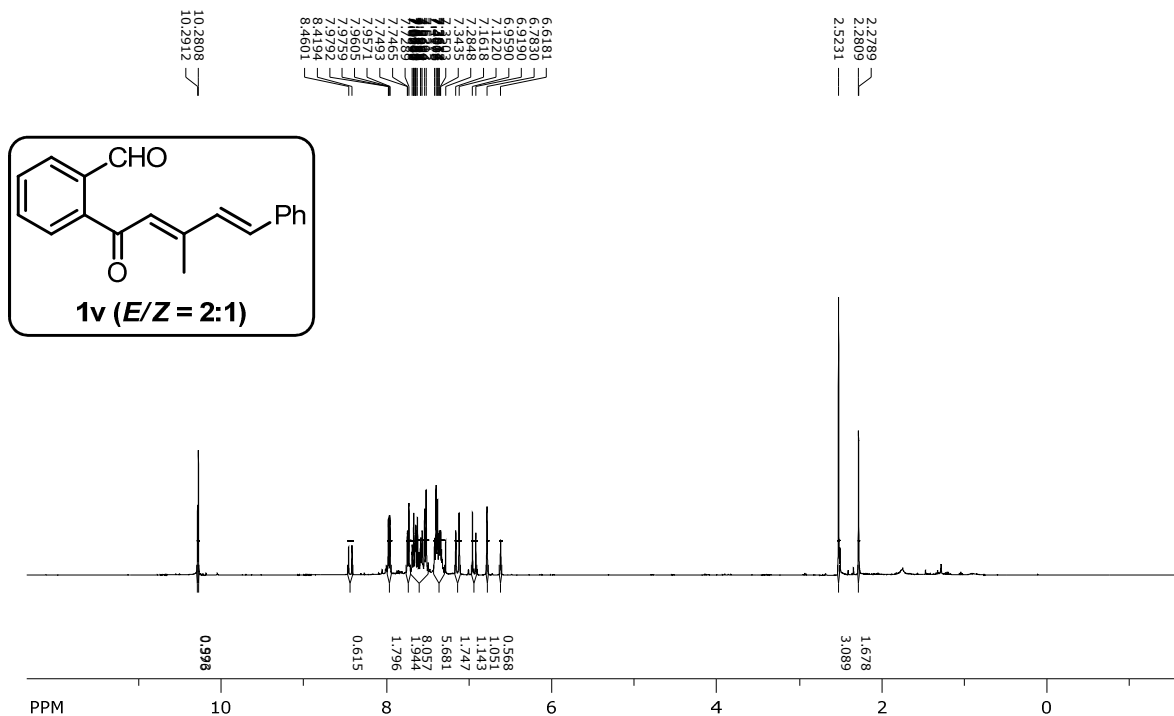

SpinWorks 4: BS 07 160  
C13CPD256 CDCI3 /opt/topspin3.5p12/nmrdata/nmrsv\_14

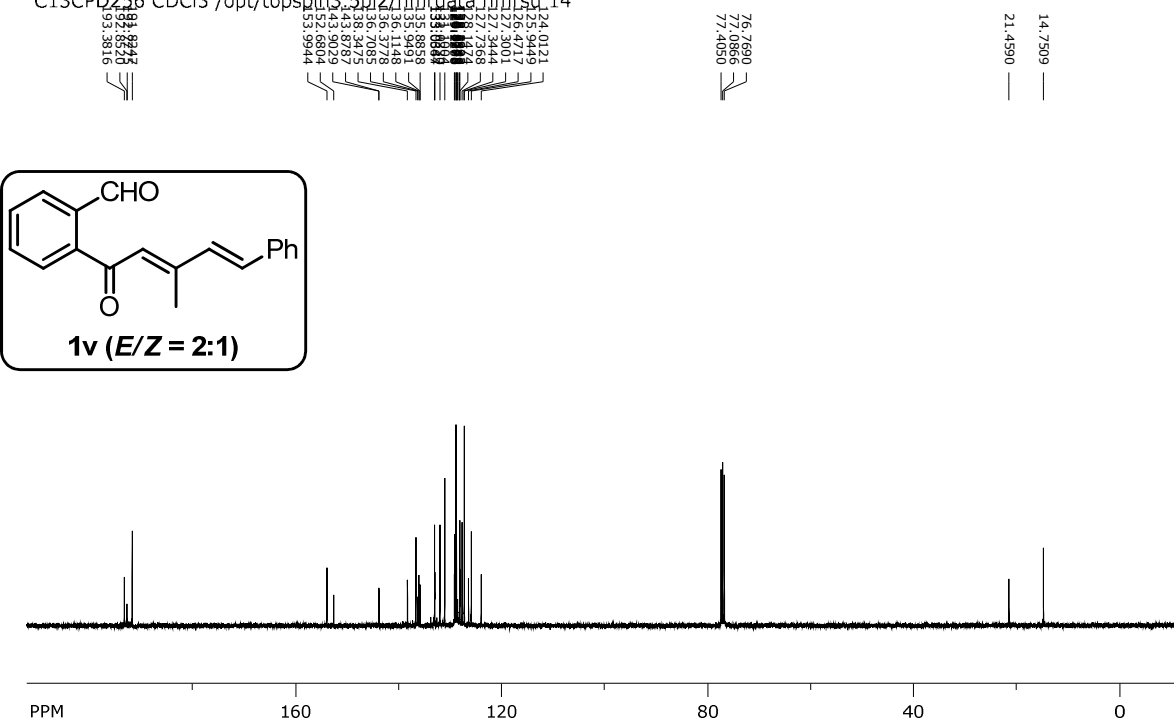



SpinWorks 4: BS-07-35

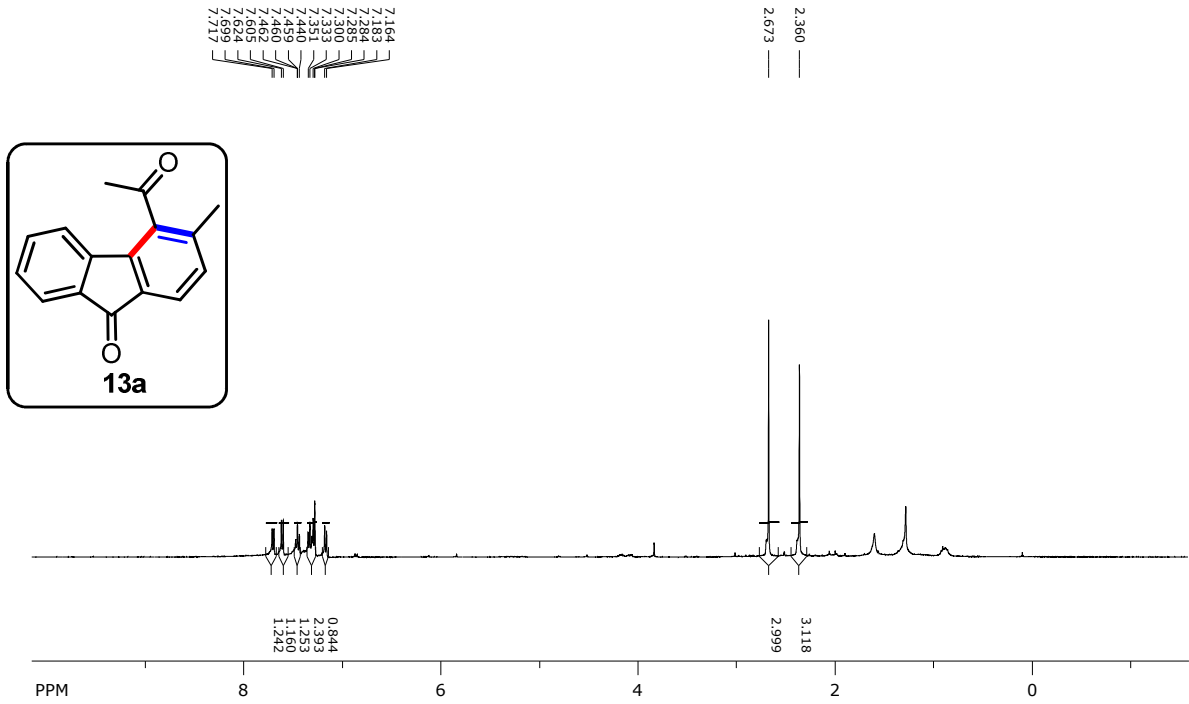

SpinWorks 4: BS 7 35  
C13CPD CDCl3 /opt/topspin3.5pl2/nmrdata nmrsu 12

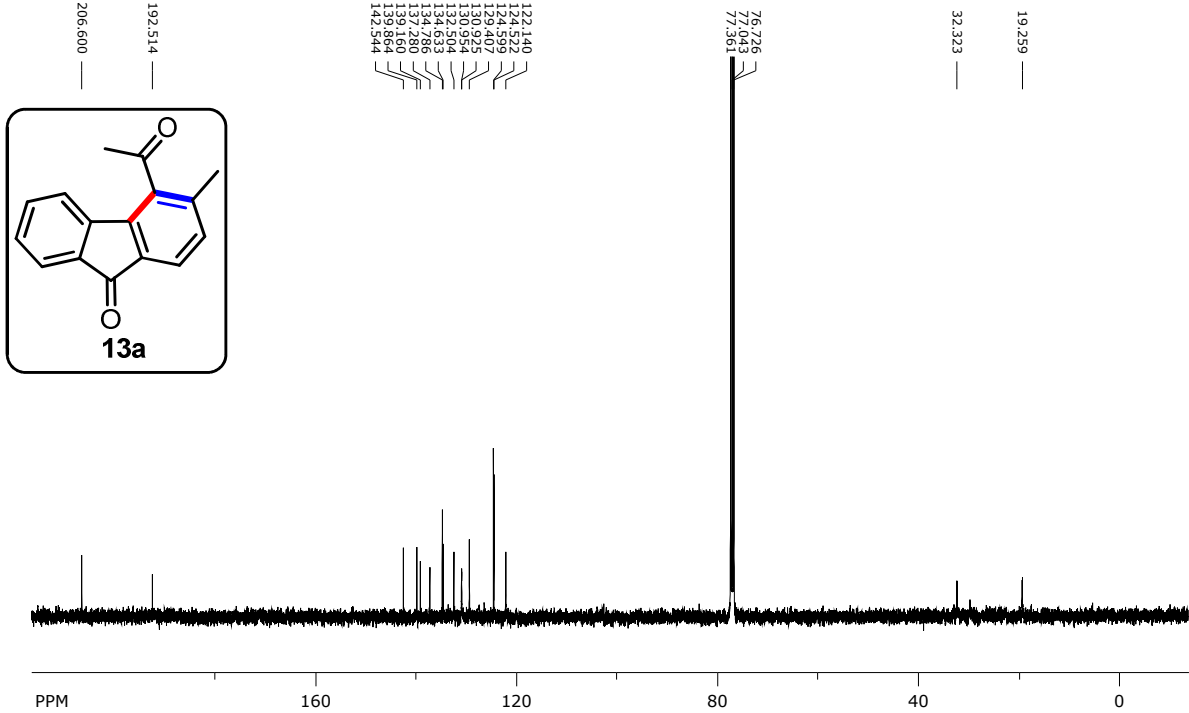

SpinWorks 4: PBS-07-38-Re

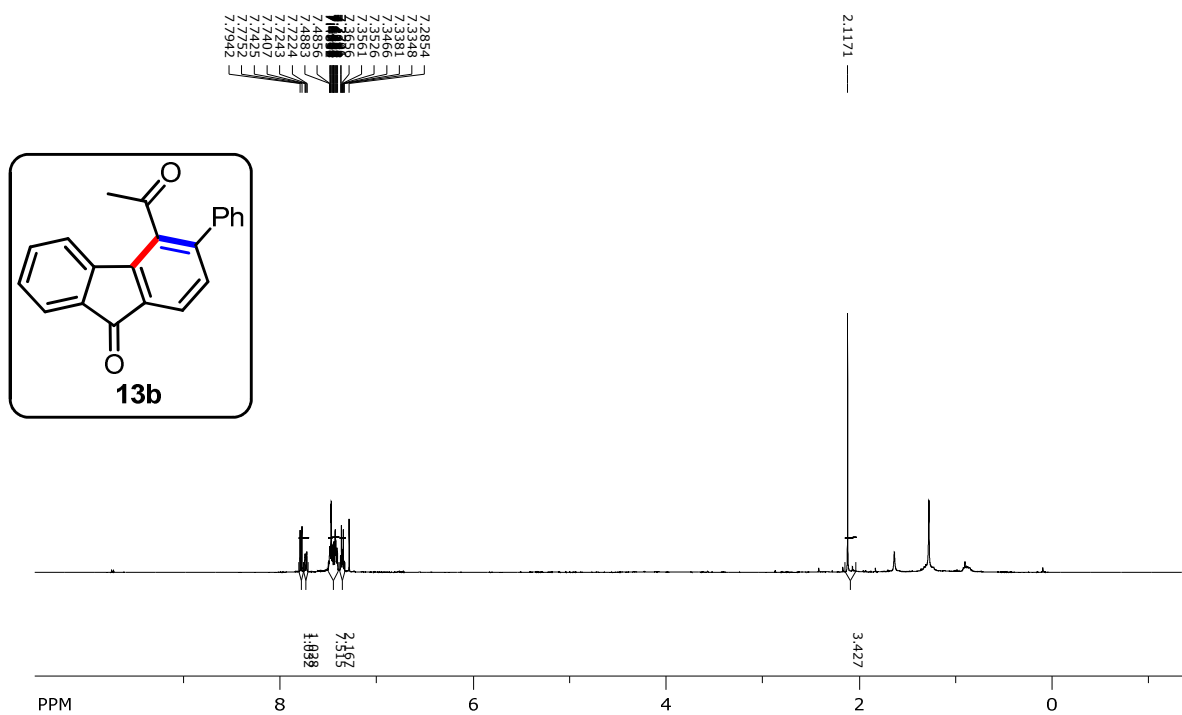

SpinWorks 4: BS 07 38 RE

C13CPD CDC13 /opt/topspin3.5pl2/nmrdata/nmr31

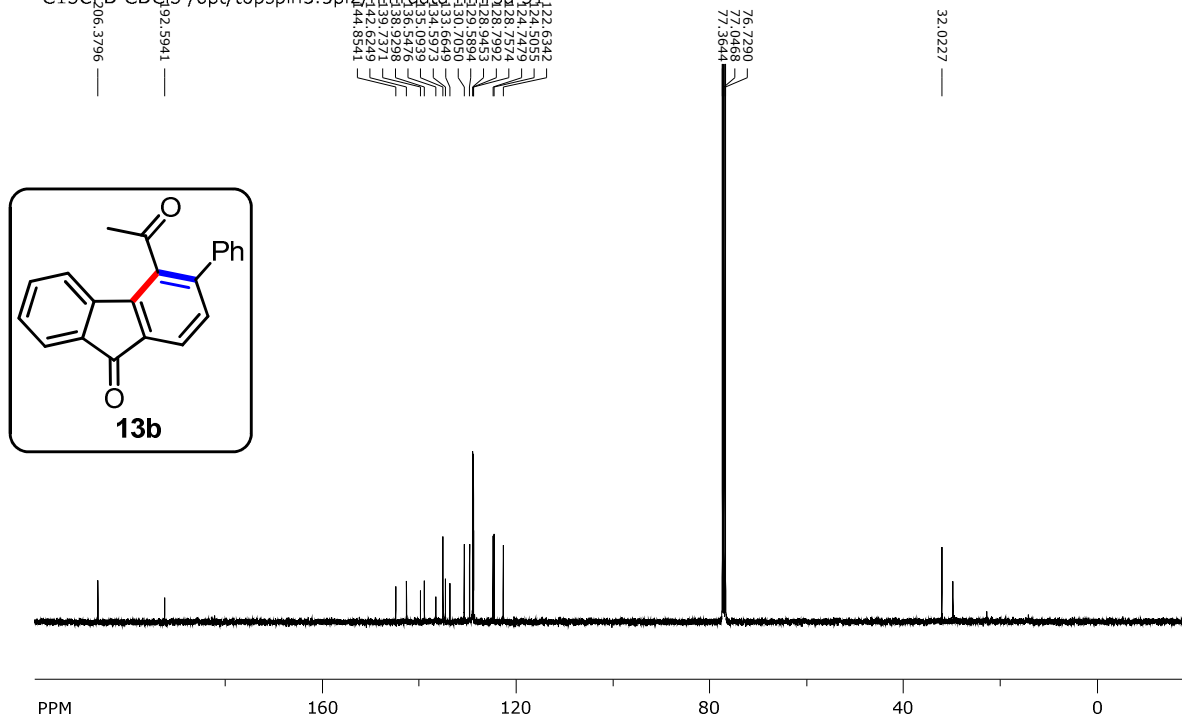

SpinWorks 4: bs 07 f1  
PROTON CDCI3 /opt/topspin3.5pl2/nmrdata nmrsu 41

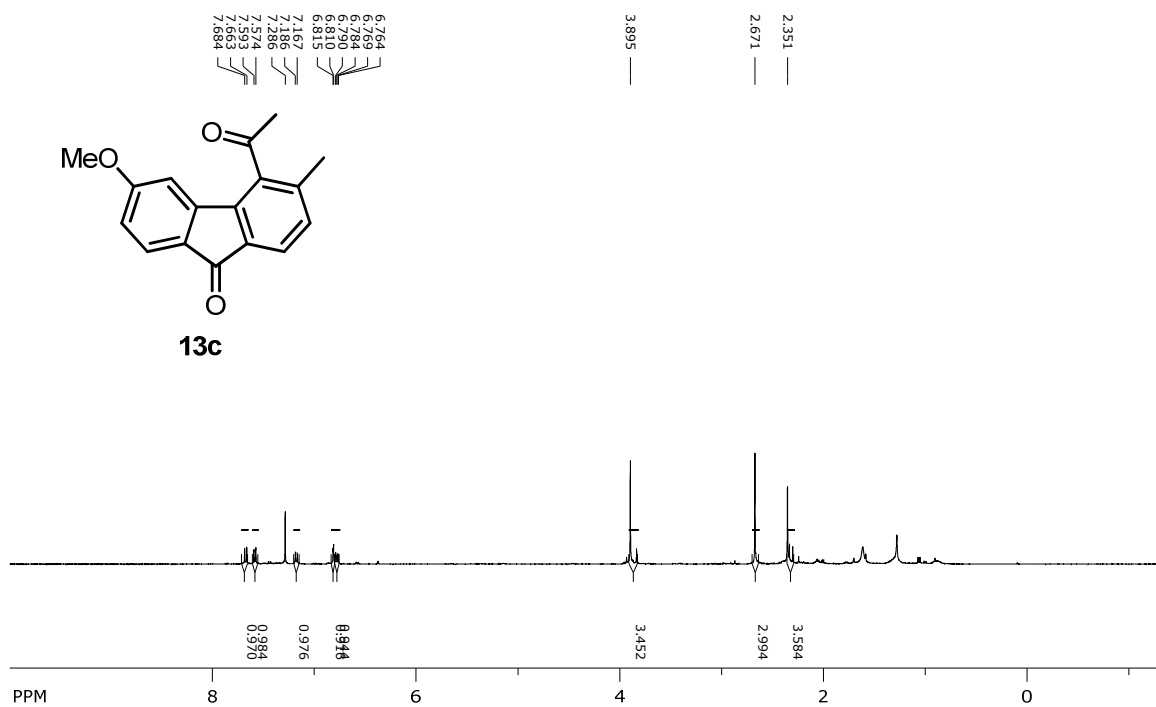

SpinWorks 4: BS 07 FL  
C13CPD CDCI3 /opt/topspin3.5pl2/nmrdata nmrsu 45

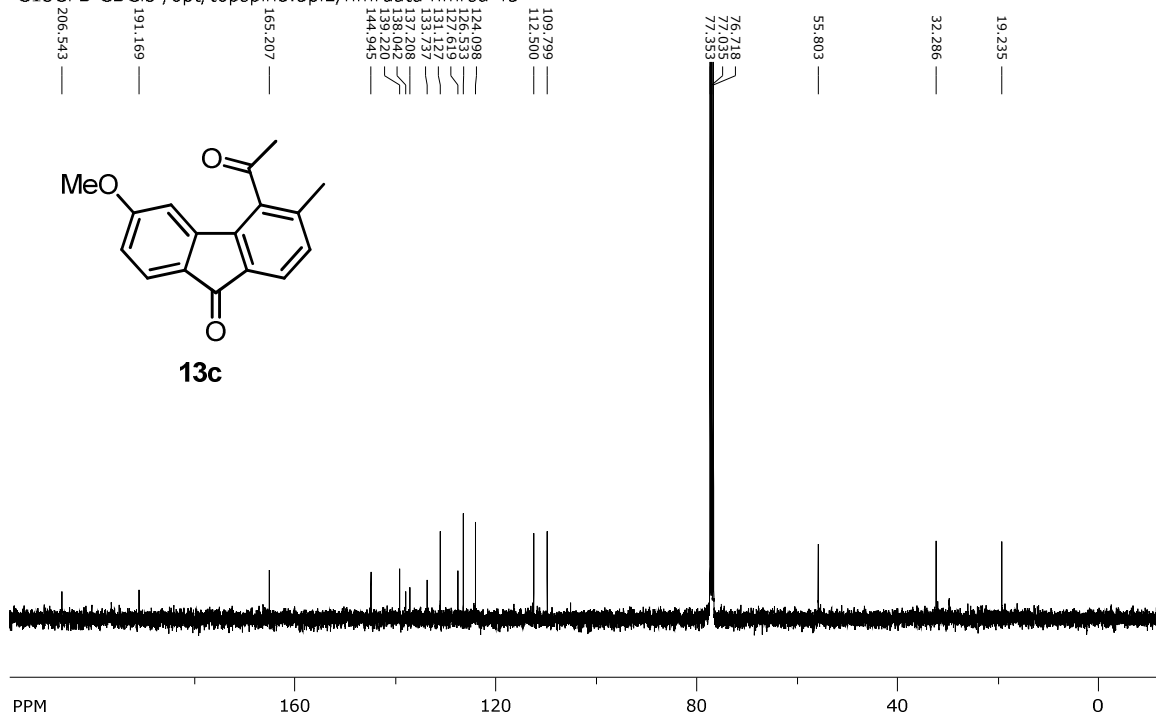

SpinWorks 4: bs 07 140

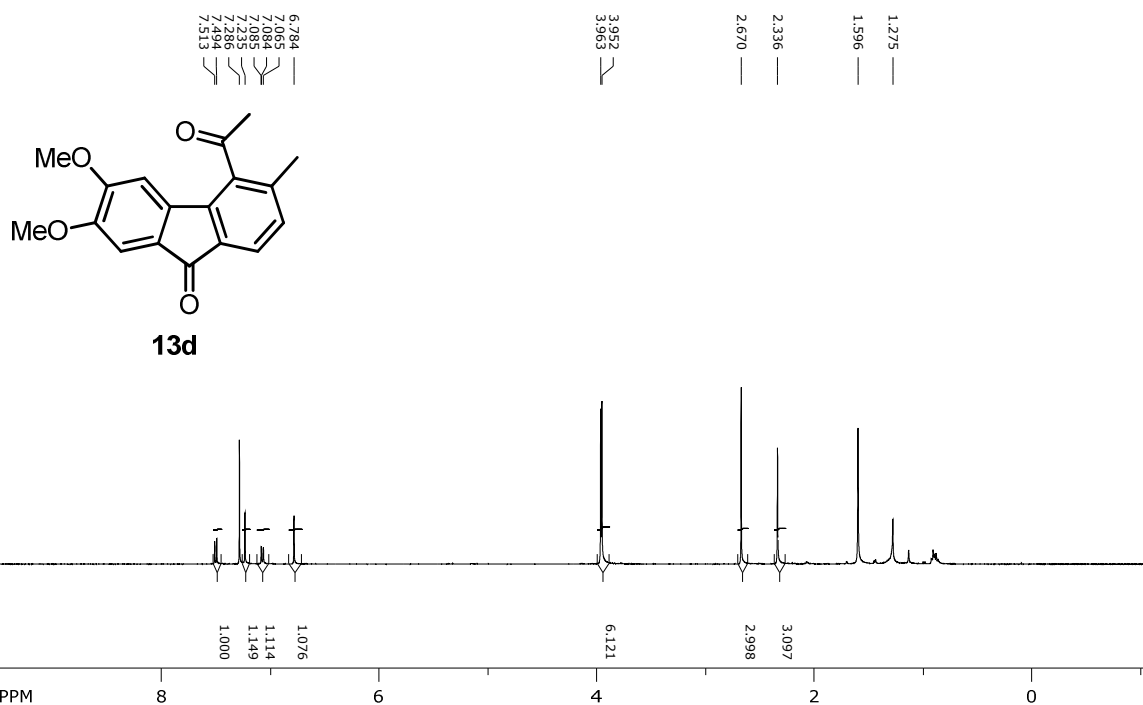

SpinWorks 4: BS-07-140  
C13CPD CDCl3 /opt/topspin3.5pl2/nmrdata nmrsu 11

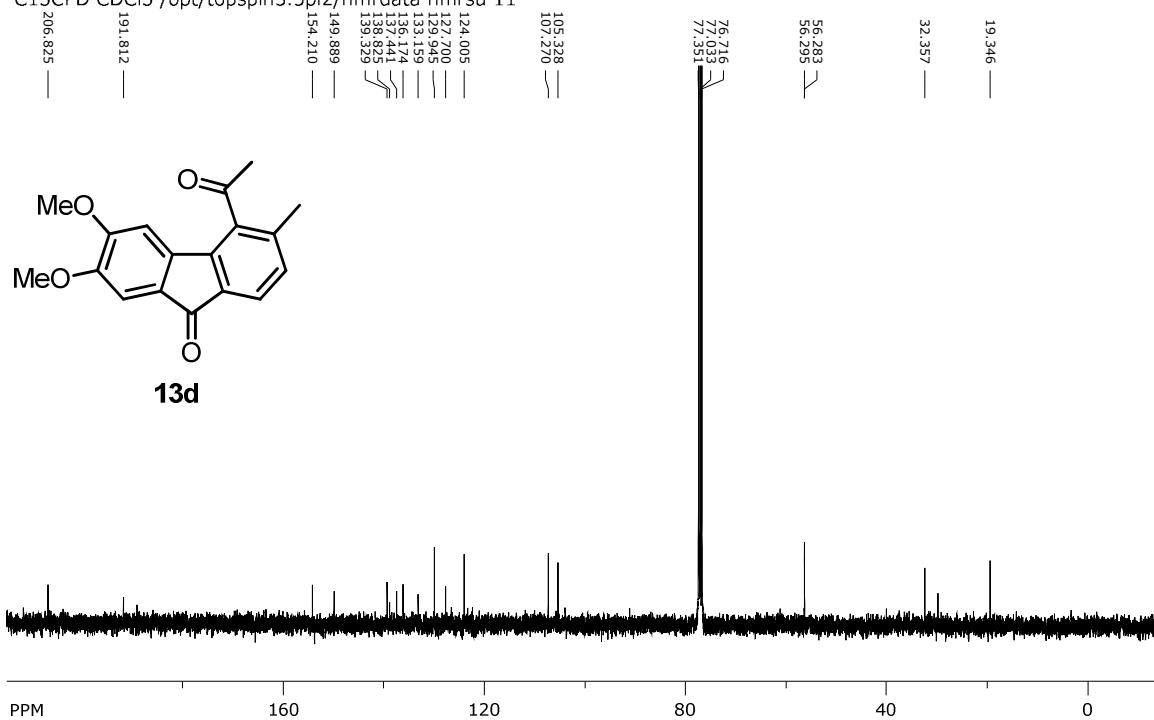

SpinWorks 4: bs-07-143

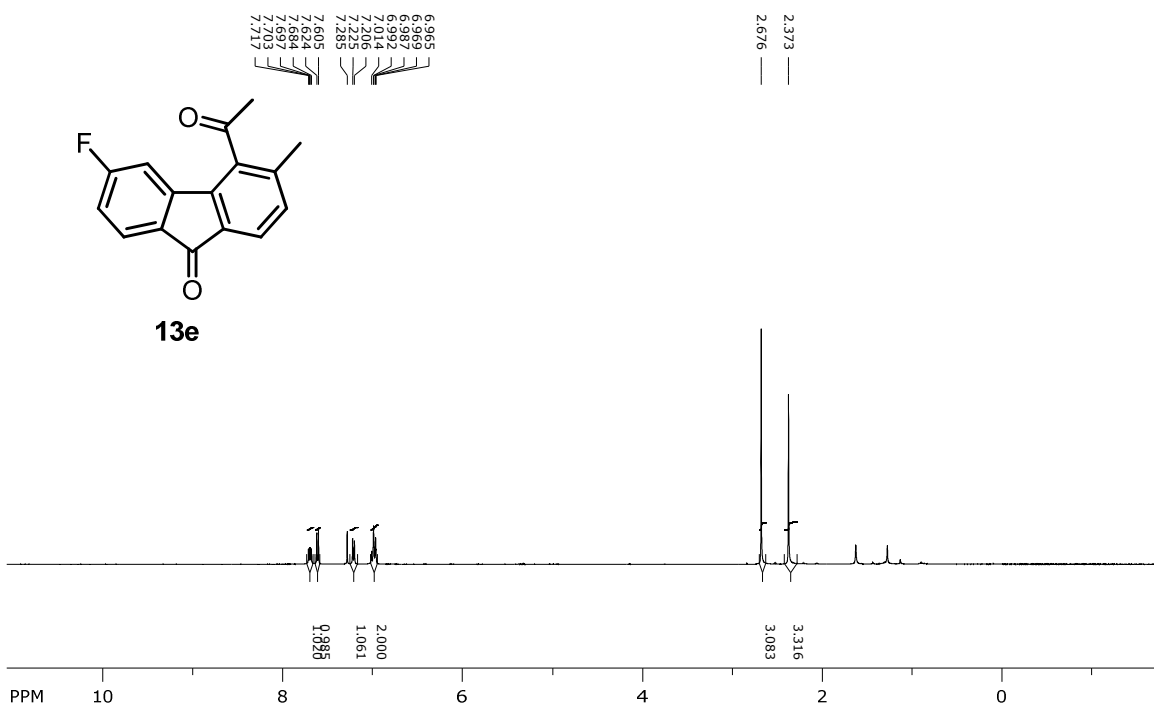

SpinWorks 4: BS 07 143

C13CPD CDCl3 /opt/topspin3.5pl2/nmrdata nmrsu 27

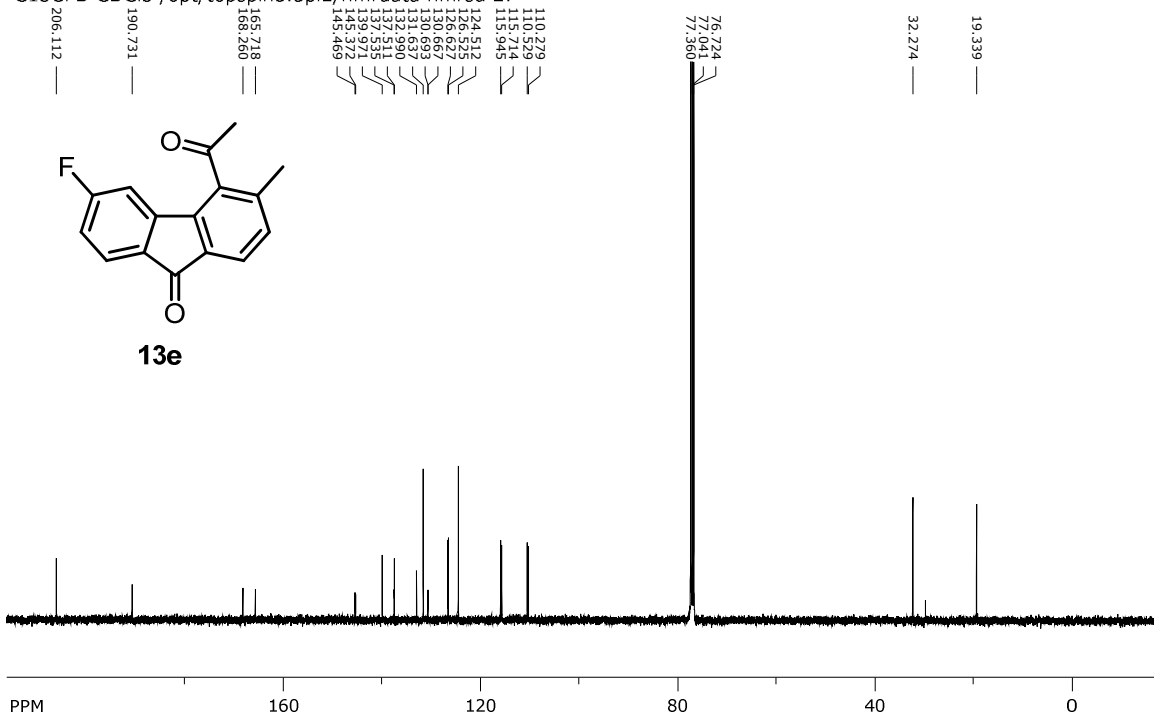

SpinWorks 4: BS 07 143  
F19CPD CDCl3 /opt/topspin3.5pl2/nmrdata nmrsu 27

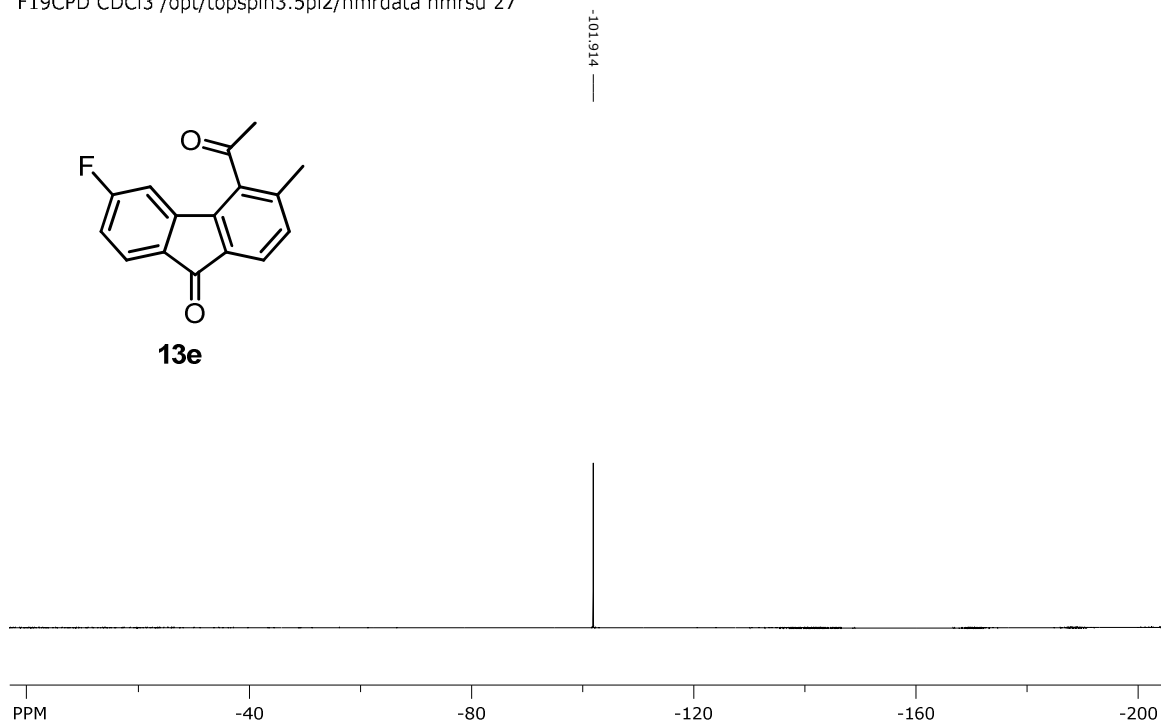

SpinWorks 4: BS 07 131  
PROTON CDCl3 /opt/topspin3.5pl2/nmrdata nmrsu 13

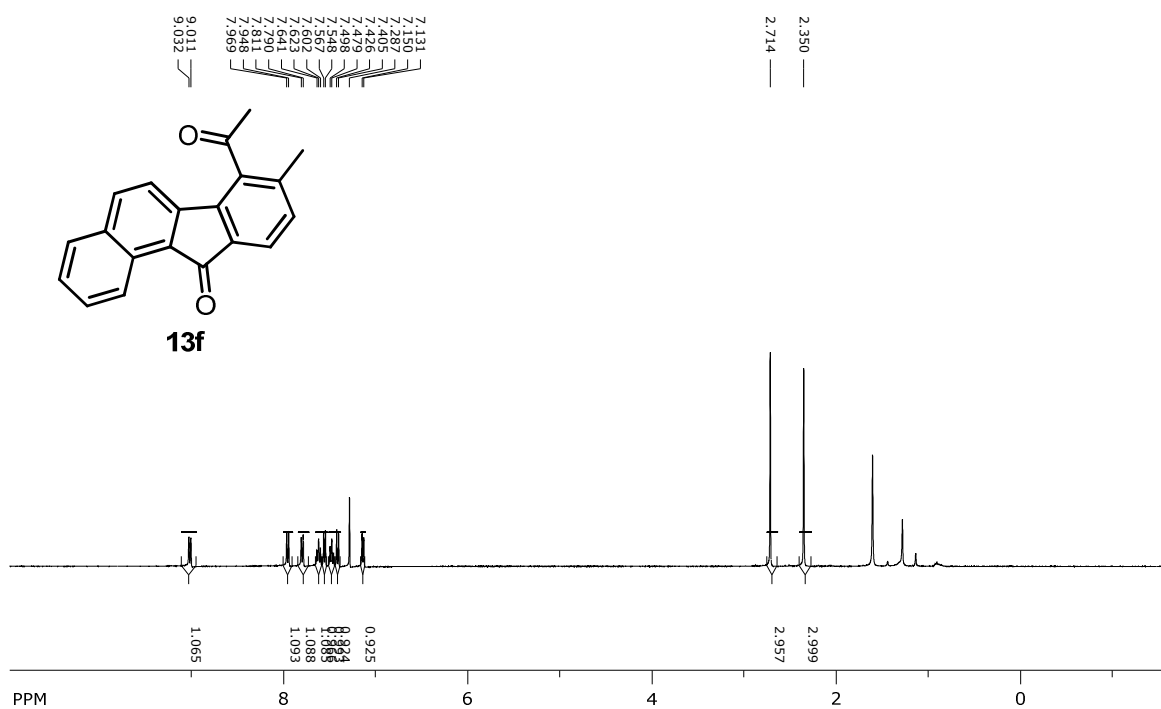



SpinWorks 4: BS 07 131  
C13CPD CDCI3 /opt/topspin3.5pl2/nmrdata nmrsu 13

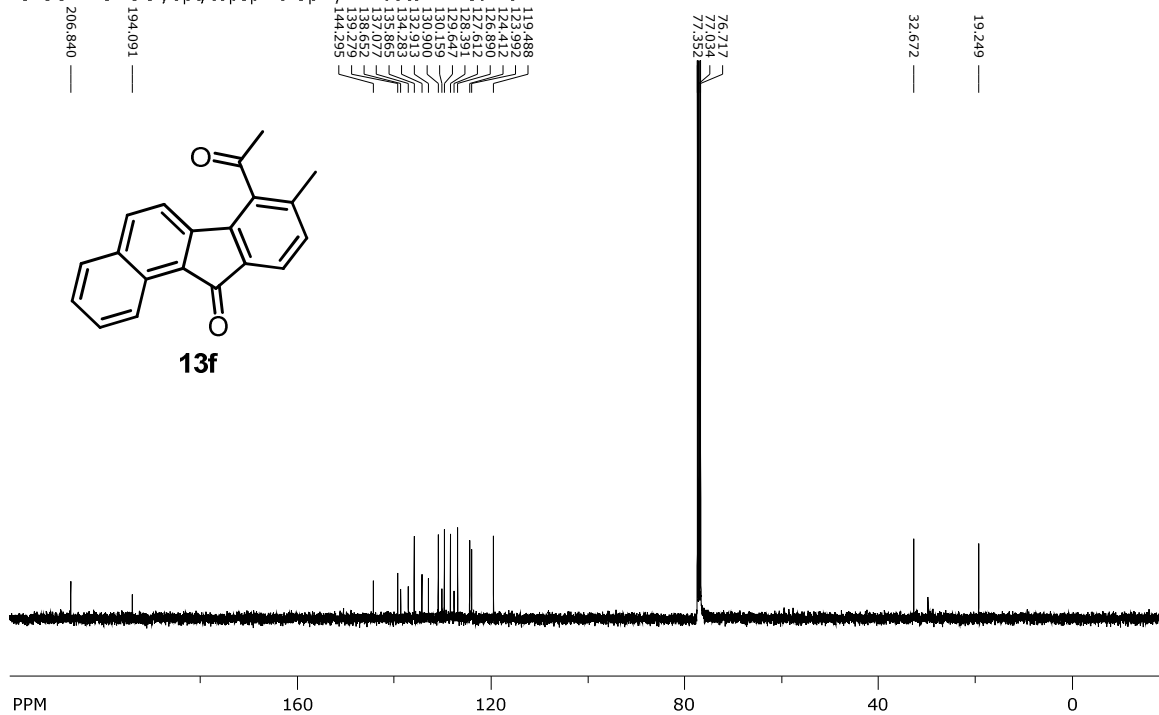

# HPLC Spectra

Empower 3  
SOFTWARE

Vishnu

## SAMPLE INFORMATION

|                   |                           |                     |                         |
|-------------------|---------------------------|---------------------|-------------------------|
| Sample Name:      | BS-benzhexdien racAS8%8ml | Acquired By:        | System                  |
| Sample Type:      | Unknown                   | Sample Set Name:    |                         |
| Vial:             | 1                         | Acq. Method Set:    | Bishnu MBH              |
| Injection #:      | 1                         | Processing Method:  | bs06benzhexdiracAS8%8ml |
| Injection Volume: | 10.00 ul                  | Channel Name:       | 254.0nm                 |
| Run Time:         | 120.0 Minutes             | Proc. Chnl. Descr.: | PDA 254.0 nm            |
| Date Acquired:    | 21-04-2017 20:40:26 IST   |                     |                         |
| Date Processed:   | 25-04-2017 21:42:27 IST   |                     |                         |

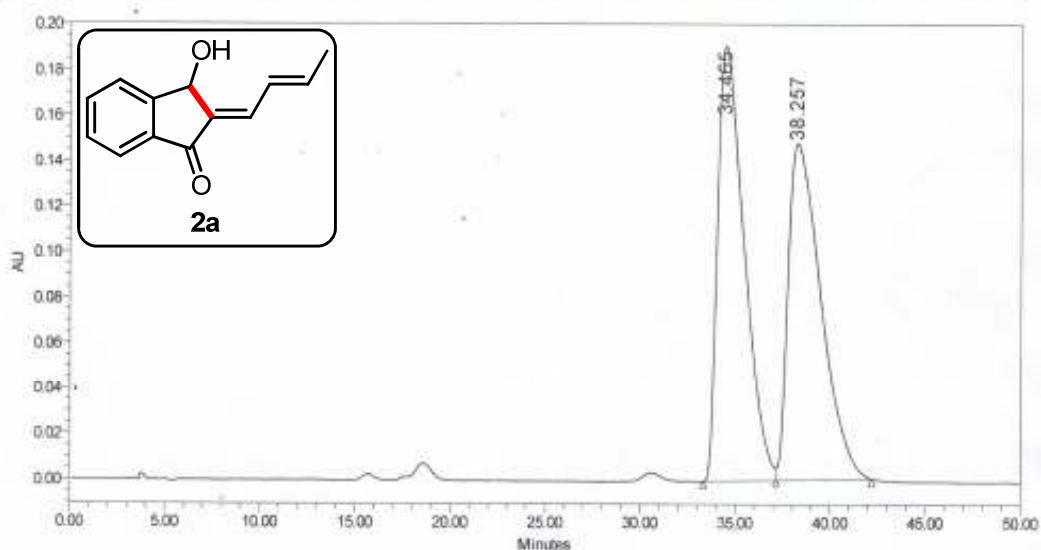

|   | RT     | Area     | % Area | Height |
|---|--------|----------|--------|--------|
| 1 | 34.465 | 18524127 | 50.99  | 191051 |
| 2 | 38.257 | 17803583 | 49.01  | 147866 |

Reported by User: System  
Report Method: Vishnu  
Report Method ID: 7929  
Page: 1 of 2

Project Name: YR\_01  
Date Printed:  
25-04-2017  
22:34:29 Asia/Calcutta

## SAMPLE INFORMATION

|                   |                             |                     |                     |
|-------------------|-----------------------------|---------------------|---------------------|
| Sample Name:      | BS-benzhexdiencat15AS8% 8ml | Acquired By:        | System              |
| Sample Type:      | Unknown                     | Sample Set Name     |                     |
| Vial:             | 1                           | Acq. Method Set:    | Bishnu MBH          |
| Injection #:      | 2                           | Processing Method:  | bs06 benzhexdicat15 |
| Injection Volume: | 10.00 ul                    | Channel Name:       | 254.0nm             |
| Run Time:         | 120.0 Minutes               | Proc. Chnl. Descr.: | PDA 254.0 nm        |
| Date Acquired:    | 21-04-2017 21:34:09 IST     |                     |                     |
| Date Processed:   | 25-04-2017 21:43:14 IST     |                     |                     |

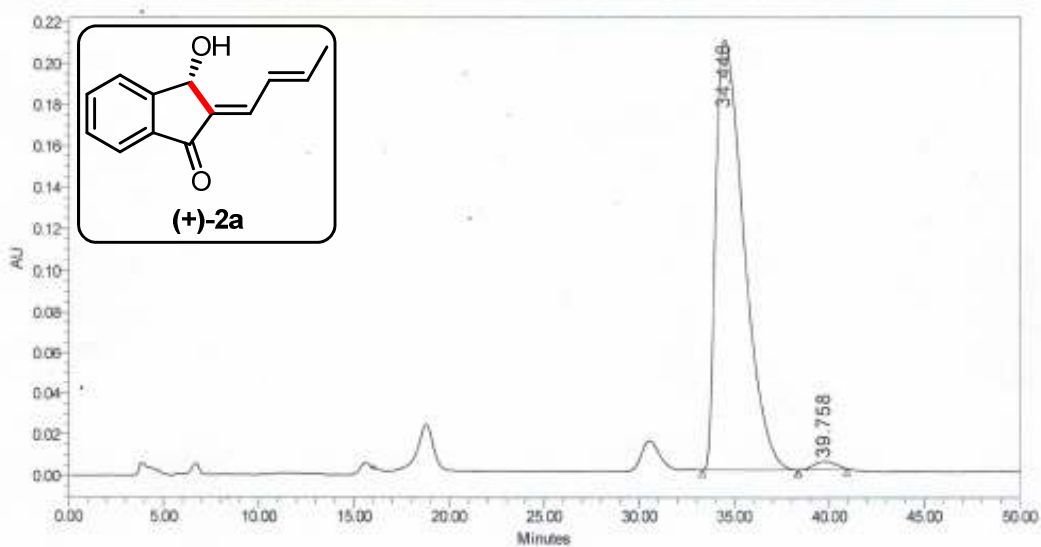

|   | RT     | Area     | % Area | Height |
|---|--------|----------|--------|--------|
| 1 | 34.448 | 21522395 | 98.66  | 208979 |
| 2 | 39.758 | 291380   | 1.34   | 3699   |

Reported by User: System  
 Report Method: Vishnu  
 Report Method ID: 7929  
 Page: 1 of 2

Project Name: YR\_01  
 Date Printed:  
 25-04-2017  
 22:34:44 Asia/Calcutta

## SAMPLE INFORMATION

|                   |                         |                     |                        |
|-------------------|-------------------------|---------------------|------------------------|
| Sample Name:      | BS-benznaphracAD12%.8ml | Acquired By:        | System                 |
| Sample Type:      | Unknown                 | Sample Set Name:    |                        |
| Vial:             | 1                       | Acq. Method Set:    | Bishnu MBH             |
| Injection #:      | 1                       | Processing Method:  | bs benznaphracAD12%8ml |
| Injection Volume: | 10.00 ul                | Channel Name:       | 254.0nm                |
| Run Time:         | 120.0 Minutes           | Proc. Chnl. Descr.: | PDA 254.0 nm           |
| Date Acquired:    | 24-04-2017 23:37:32 IST |                     |                        |
| Date Processed:   | 25-04-2017 21:57:17 IST |                     |                        |

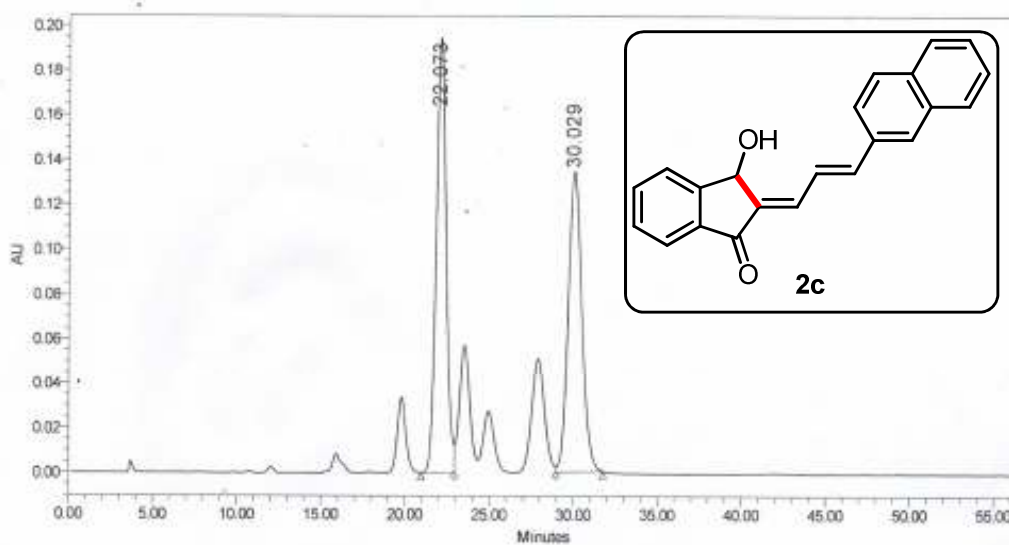

|   | RT     | Area    | % Area | Height |
|---|--------|---------|--------|--------|
| 1 | 22.073 | 7939004 | 51.32  | 194339 |
| 2 | 30.029 | 7531677 | 48.68  | 134345 |

Reported by User: System  
Report Method: Vishnu  
Report Method ID: 7933  
Page: 1 of 2

Project Name: YR\_01  
Date Printed:  
25-04-2017  
22:43:59 Asia/Calcutta

## SAMPLE INFORMATION

|                   |                           |                     |                  |
|-------------------|---------------------------|---------------------|------------------|
| Sample Name:      | BS-benznaphcat15AD12% 8ml | Acquired By:        | System           |
| Sample Type:      | Unknown                   | Sample Set Name:    |                  |
| Vial:             | 1                         | Acq. Method Set:    | Bishnu MBH       |
| Injection #:      | 1                         | Processing Method:  | bs benznaphcat15 |
| Injection Volume: | 10.00 ul                  | Channel Name:       | 254.0nm          |
| Run Time:         | 120.0 Minutes             | Proc. Chnl. Descr.: | PDA 254.0 nm     |
| Date Acquired:    | 25-04-2017 12:20:47 IST   |                     |                  |
| Date Processed:   | 25-04-2017 21:59:44 IST   |                     |                  |

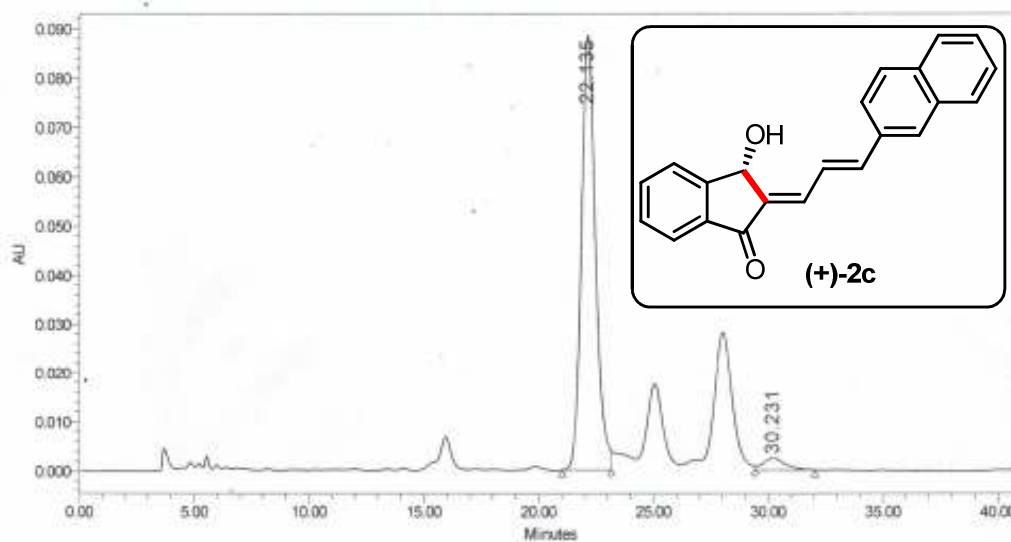

|   | RT     | Area    | % Area | Height |
|---|--------|---------|--------|--------|
| 1 | 22.135 | 3750575 | 96.01  | 88444  |
| 2 | 30.231 | 155961  | 3.99   | 2373   |

Reported by User: System  
 Report Method: Vishnu  
 Report Method ID: 7934  
 Page: 1 of 2

Project Name: YR\_01  
 Date Printed:  
 25-04-2017  
 22:44:11 Asia/Calcutta

## SAMPLE INFORMATION

Sample Name: BS06-benzdiomeracAD15%1ml Acquired By: System  
Sample Type: Unknown Sample Set Name  
Vial: 1 Acq. Method Set: Bishnu MBH  
Injection #: 1 Processing Method: bs06benzdiomeracAD15%1ml  
Injection Volume: 10.00 ul Channel Name: 254.0nm  
Run Time: 100.0 Minutes Proc. Chnl. Descr.: PDA 254.0 nm

Date Acquired: 03-09-2016 15:22:49 IST  
Date Processed: 20-09-2016 22:32:38 IST

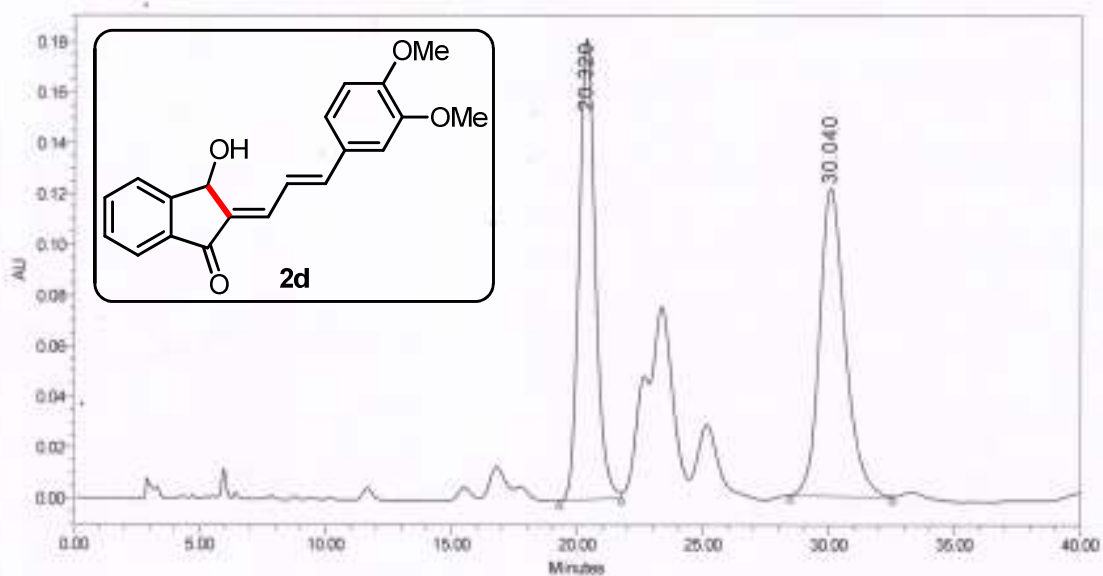

|   | RT     | Area    | % Area | Height |
|---|--------|---------|--------|--------|
| 1 | 20.320 | 8188970 | 48.70  | 181834 |
| 2 | 30.040 | 8627414 | 51.30  | 121391 |

Reported by User: System  
Report Method: Vishnu  
Report Method ID: 6497  
Page: 1 of 2

Project Name: YR\_01  
Date Printed:  
20-09-2016  
22:37:55 Asia/Calcutta

## SAMPLE INFORMATION

|                   |                         |                     |                    |
|-------------------|-------------------------|---------------------|--------------------|
| Sample Name:      | Unknown                 | Acquired By:        | System             |
| Sample Type:      | 1                       | Sample Set Name:    | Bishnu MBH         |
| Vial:             | 2                       | Acq. Method Set:    | bs06benzdiomecat15 |
| Injection #:      | 10.00 ul                | Processing Method:  | 254.0nm            |
| Injection Volume: | 100.0 Minutes           | Channel Name:       | PDA 254.0 nm       |
| Run Time:         |                         | Proc. Chnl. Descr.: |                    |
| Date Acquired:    | 03-09-2016 16:10:29 IST |                     |                    |
| Date Processed:   | 20-09-2016 22:33:16 IST |                     |                    |

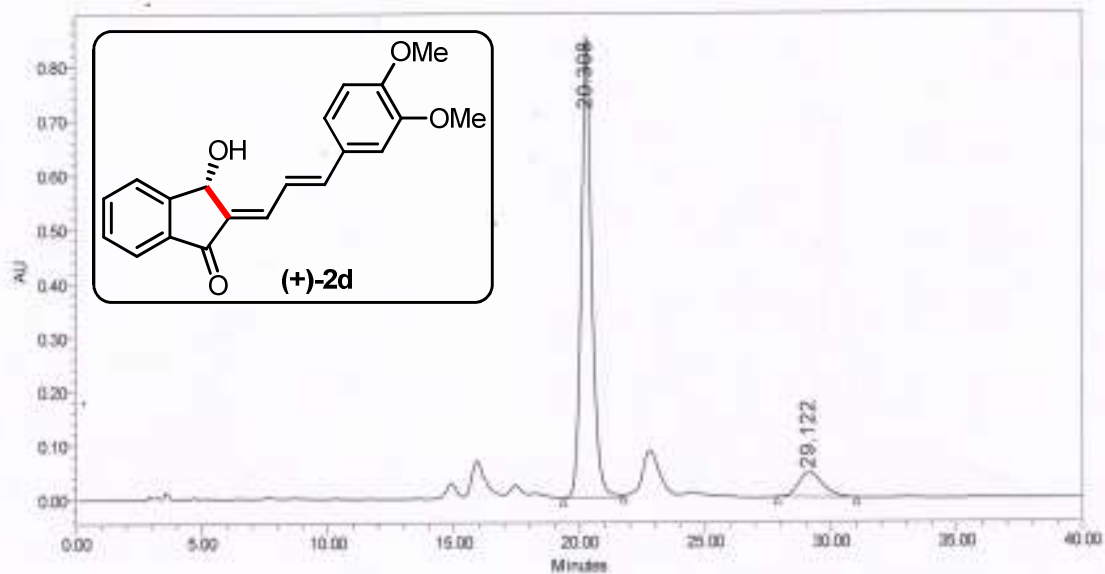

|   | RT     | Area     | % Area | Height |
|---|--------|----------|--------|--------|
| 1 | 20.308 | 24270612 | 88.89  | 651849 |
| 2 | 29.122 | 3033272  | 11.11  | 45409  |

Reported by User: System  
 Report Method: Vishnu  
 Report Method II 6497  
 Page: 1 of 2

Project Name: YR\_01  
 Date Printed:  
 20-09-2016  
 22:37:28 Asia/Calcutta

## SAMPLE INFORMATION

|                   |                         |                     |                     |
|-------------------|-------------------------|---------------------|---------------------|
| Sample Name:      | BS-benzdiphracAS10%     | Acquired By:        | System              |
| Sample Type:      | Unknown                 | Sample Set Name:    |                     |
| Vial:             | 1                       | Acq. Method Set:    | Bishnu MBH          |
| Injection #:      | 1                       | Processing Method:  | bs benzdiphracAS10% |
| Injection Volume: | 10.00 ul                | Channel Name:       | 254.0nm             |
| Run Time:         | 120.0 Minutes           | Proc. Chnl. Descr.: | PDA 254.0 nm        |
| Date Acquired:    | 23-04-2017 11:11:38 IST |                     |                     |
| Date Processed:   | 25-04-2017 21:50:30 IST |                     |                     |

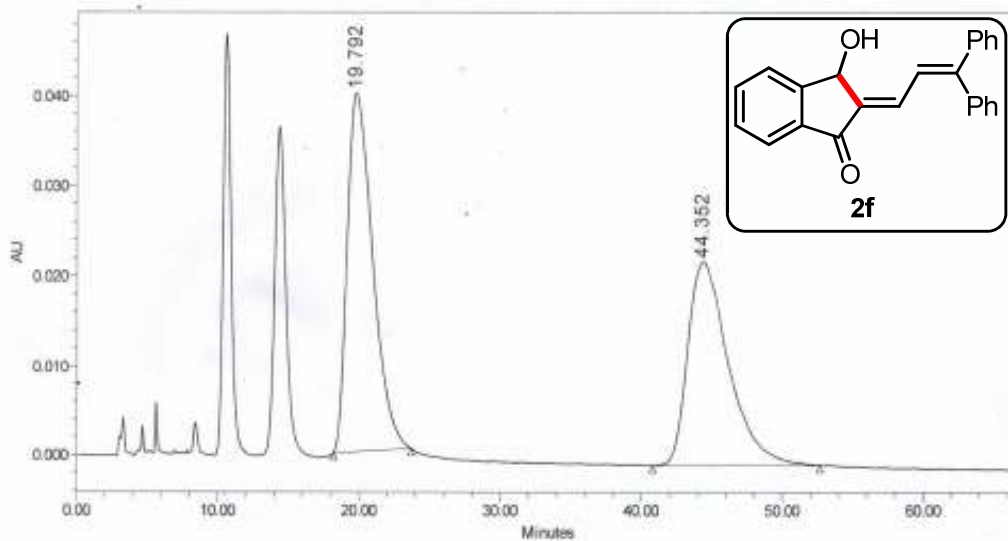

|   | RT     | Area    | % Area | Height |
|---|--------|---------|--------|--------|
| 1 | 19.792 | 5014124 | 52.11  | 39982  |
| 2 | 44.352 | 4608068 | 47.89  | 22791  |

Reported by User: System  
 Report Method: Vishnu  
 Report Method II 7933  
 Page: 1 of 2

Project Name: YR\_01  
 Date Printed:  
 25-04-2017  
 22:39:05 Asia/Calcutta



## SAMPLE INFORMATION

|                   |                         |                     |                  |
|-------------------|-------------------------|---------------------|------------------|
| Sample Name:      | BS-benzdiphcat15AS10%   | Acquired By:        | System           |
| Sample Type:      | Unknown                 | Sample Set Name:    |                  |
| Vial:             | 1                       | Acq. Method Set:    | Bishnu MBH       |
| Injection #:      | 1                       | Processing Method:  | bs benzdiphcat15 |
| Injection Volume: | 10.00 ul                | Channel Name:       | 254.0nm          |
| Run Time:         | 120.0 Minutes           | Proc. Chnl. Descr.: | PDA 254.0 nm     |
| Date Acquired:    | 24-04-2017 16:20:42 IST |                     |                  |
| Date Processed:   | 25-04-2017 21:51:15 IST |                     |                  |

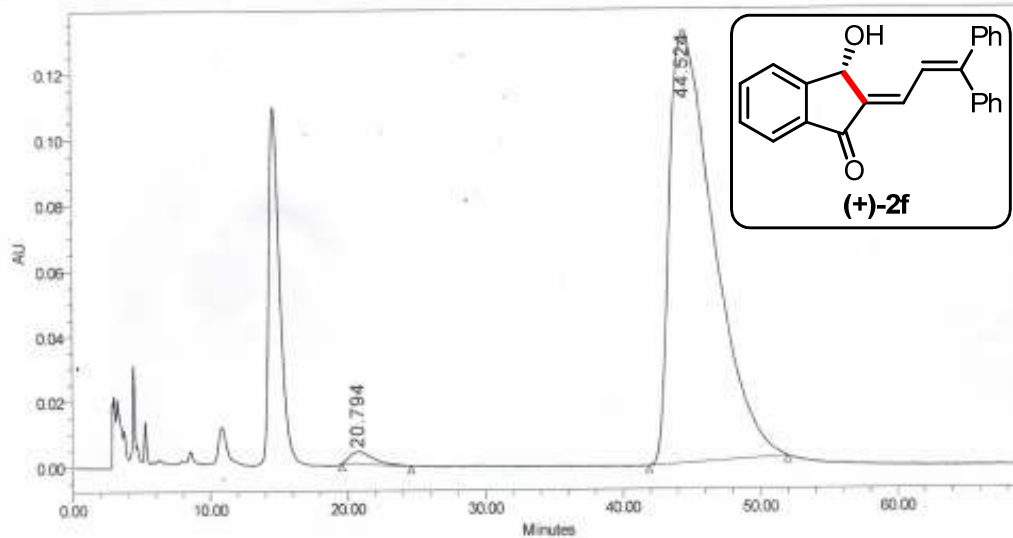

|   | RT     | Area     | % Area | Height |
|---|--------|----------|--------|--------|
| 1 | 20.794 | 457981   | 1.53   | 3786   |
| 2 | 44.524 | 29536340 | 98.47  | 132123 |

Reported by User: System  
 Report Method: Vishnu  
 Report Method IL7933  
 Page: 1 of 2

Project Name: YR\_01  
 Date Printed:  
 25-04-2017  
 22:43:04 Asa/Calcutta

## SAMPLE INFORMATION

|                   |                         |                     |                         |
|-------------------|-------------------------|---------------------|-------------------------|
| Sample Name:      | BS-06FbenzhexraciC5%1ml | Acquired By:        | System                  |
| Sample Type:      | Unknown                 | Sample Set Name:    |                         |
| Vial:             | 1                       | Acq. Method Set:    | Bishnu MBH              |
| Injection #:      | 1                       | Processing Method:  | bs06 FbenzhexraciC5%1ml |
| Injection Volume: | 10.00 ul                | Channel Name:       | 254.0nm                 |
| Run Time:         | 120.0 Minutes           | Proc. Chnl. Descr.: | PDA 254.0 nm            |
| Date Acquired:    | 21-04-2017 10:53:28 IST |                     |                         |
| Date Processed:   | 25-04-2017 21:39:49 IST |                     |                         |

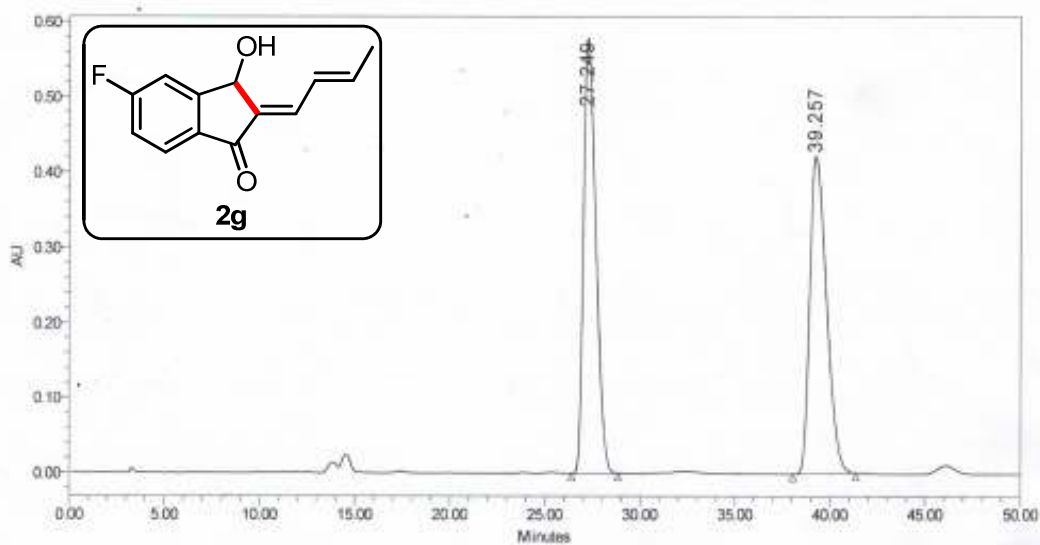

|   | RT     | Area     | % Area | Height |
|---|--------|----------|--------|--------|
| 1 | 27.249 | 26005920 | 49.87  | 578837 |
| 2 | 39.257 | 26139020 | 50.13  | 422721 |

Reported by User: System  
 Report Method: Vishnu  
 Report Method ID: 7317  
 Page: 1 of 2

Project Name: YR\_01  
 Date Printed:  
 25-04-2017  
 22:33:35 Asia/Calcutta

SAMPLE INFORMATION

|                   |                           |                     |                    |
|-------------------|---------------------------|---------------------|--------------------|
| Sample Name:      | BS-06Fbenzhexcat15IC5%1ml | Acquired By:        | System             |
| Sample Type:      | Unknown                   | Sample Set Name     |                    |
| Vial:             | 1                         | Acq. Method Set:    | Bishnu MBH         |
| Injection #:      | 2                         | Processing Method:  | bs06 Fbenzhexcat15 |
| Injection Volume: | 10.00 ul                  | Channel Name:       | 254.0nm            |
| Run Time:         | 120.0 Minutes             | Proc. Chnl. Descr.: | PDA 254.0 nm       |
| Date Acquired:    | 21-04-2017 11:52:24 IST   |                     |                    |
| Date Processed:   | 25-04-2017 21:41:44 IST   |                     |                    |

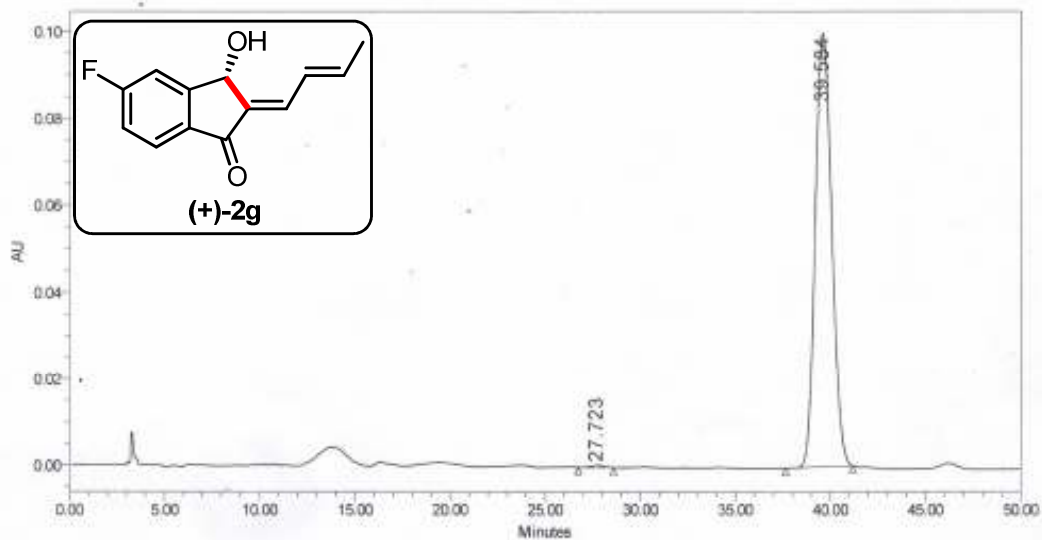

|   | RT     | Area    | % Area | Height |
|---|--------|---------|--------|--------|
| 1 | 27.723 | 23684   | 0.39   | 516    |
| 2 | 39.584 | 6060191 | 99.61  | 100066 |

Reported by User: System  
 Report Method: Vishnu  
 Report Method ID: 7929  
 Page: 1 of 2

Project Name: YR\_01  
 Date Printed: 25-04-2017  
 22:33:50 Asia/Calcutta

## SAMPLE INFORMATION

|                   |                         |                     |                         |
|-------------------|-------------------------|---------------------|-------------------------|
| Sample Name:      | Unknown                 | Acquired By:        | System                  |
| Sample Type:      | 1                       | Sample Set Name:    | Bishnu MBH              |
| Vial:             | 1                       | Acq. Method Set:    | bs060mebenzhexadienerac |
| Injection #:      | 1                       | Processing Method:  | 254.0nm                 |
| Injection Volume: | 10.00 ul                | Channel Name:       | PDA 254.0 nm            |
| Run Time:         | 120.0 Minutes           | Proc. Chnl. Descr.: |                         |
| Date Acquired:    | 11-02-2016 22:12:01 IST |                     |                         |
| Date Processed:   | 11-02-2016 23:21:25 IST |                     |                         |

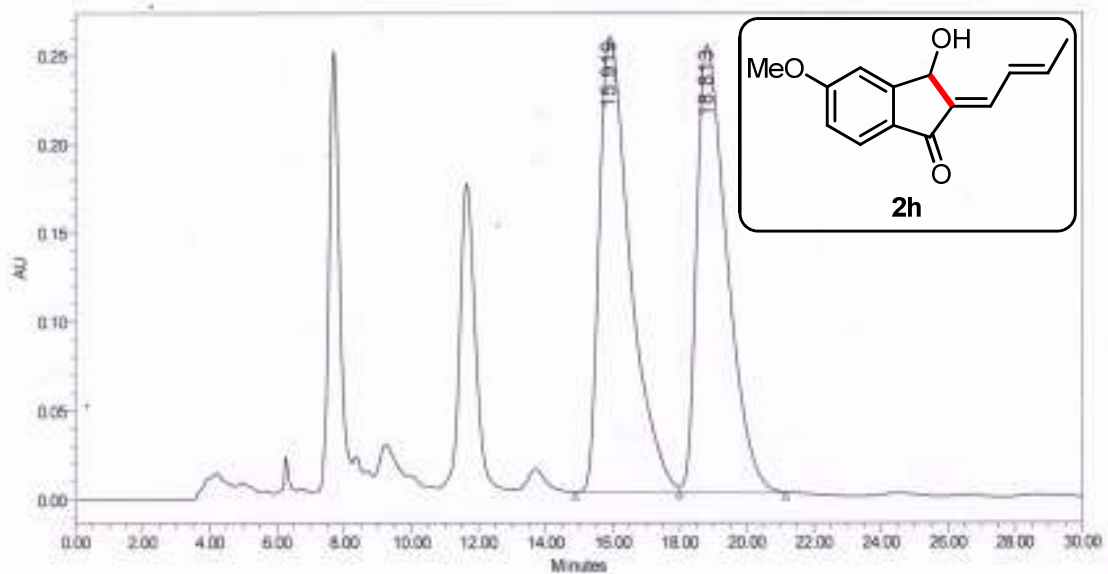

|   | RT     | Area     | % Area | Height |
|---|--------|----------|--------|--------|
| 1 | 15.919 | 16462182 | 51.04  | 256579 |
| 2 | 18.813 | 15790919 | 48.96  | 251667 |

Reported by User: System  
 Report Method: Vishnu  
 Report Method ID: 5354  
 Page: 1 of 2

Project Name: YR\_01  
 Date Printed:  
 11-02-2016  
 23:23:03 Asa/Calcutta

## SAMPLE INFORMATION

|                   |                         |                     |                        |
|-------------------|-------------------------|---------------------|------------------------|
| Sample Name:      | Unknown                 | Acquired By:        | System                 |
| Sample Type:      | 1                       | Sample Set Name:    | Bishnu MBH             |
| Vial:             | 2                       | Acq. Method Set:    | bsomehexdieneAS10%08ml |
| Injection #:      | 10.00 ul                | Processing Method:  | 254.0nm                |
| Injection Volume: | 120.0 Minutes           | Channel Name:       | PDA 254.0 nm           |
| Run Time:         |                         | Proc. Chnl. Descr.: |                        |
| Date Acquired:    | 11-02-2016 22:48:40 IST |                     |                        |
| Date Processed:   | 11-02-2016 23:36:04 IST |                     |                        |

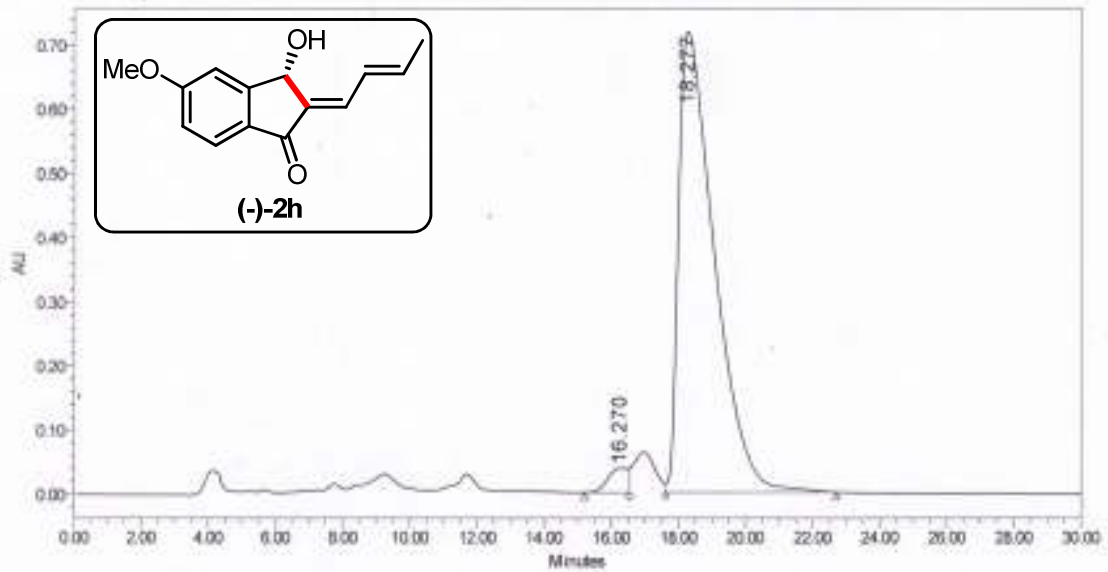

|   | RT     | Area     | % Area | Height |
|---|--------|----------|--------|--------|
| 1 | 16.270 | 1578372  | 2.88   | 38052  |
| 2 | 18.277 | 53189581 | 97.12  | 718271 |

Reported by User: System  
 Report Method: Vishnu  
 Report Method II 5354  
 Page: 1 of 2

Project Name: YR\_01  
 Date Printed:  
 11-02-2016  
 23:36:20 Asia/Calcutta

## SAMPLE INFORMATION

|                   |                         |                     |                           |
|-------------------|-------------------------|---------------------|---------------------------|
| Sample Name:      | BS-omebenzinndien       | Acquired By:        | System                    |
| Sample Type:      | Unknown                 | Sample Set Name:    |                           |
| Vial:             | 1                       | Acq. Method Set:    | Bishnu MBH                |
| Injection #:      | 1                       | Processing Method:  | bs06omebenzinhexracODH10% |
| Injection Volume: | 10.00 ul                | Channel Name:       | 254.0nm                   |
| Run Time:         | 120.0 Minutes           | Proc. Chnl. Descr.: | PDA 254.0 nm              |
| Date Acquired:    | 21-04-2017 23:45:49 IST |                     |                           |
| Date Processed:   | 25-04-2017 22:35:21 IST |                     |                           |

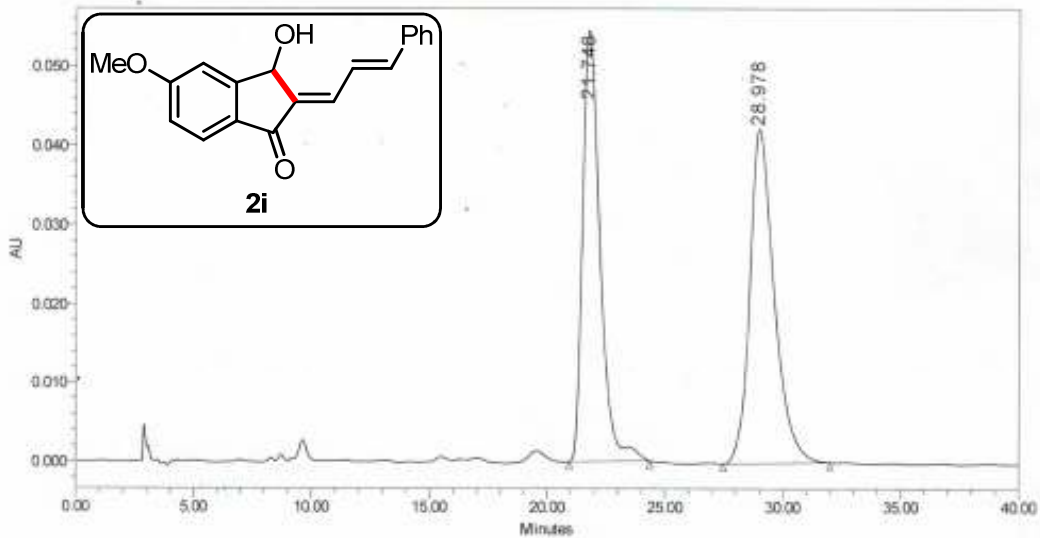

|   | RT     | Area    | % Area | Height |
|---|--------|---------|--------|--------|
| 1 | 21.748 | 2806044 | 47.88  | 54470  |
| 2 | 28.978 | 3054353 | 52.12  | 42290  |

Reported by User: System  
 Report Method: Vishnu  
 Report Method ID: 7929  
 Page: 1 of 2

Project Name: YR\_01  
 Date Printed: 25-04-2017  
 22:35:53 Asia/Calcutta

## SAMPLE INFORMATION

|                   |                         |                     |                        |
|-------------------|-------------------------|---------------------|------------------------|
| Sample Name:      | Unknown                 | Acquired By:        | System                 |
| Sample Type:      | 1                       | Sample Set Name:    | Bishnu MBH             |
| Vial:             | 2                       | Acq. Method Set:    | bs06omebenzoinhexcat15 |
| Injection #:      | 10.00 ul                | Processing Method:  | 254.0nm                |
| Injection Volume: | 120.0 Minutes           | Channel Name:       | PDA 254.0 nm           |
| Run Time:         |                         | Proc. Chnl. Descr.: |                        |
| Date Acquired:    | 22-04-2017 00:28:49 IST |                     |                        |
| Date Processed:   | 25-04-2017 21:44:59 IST |                     |                        |

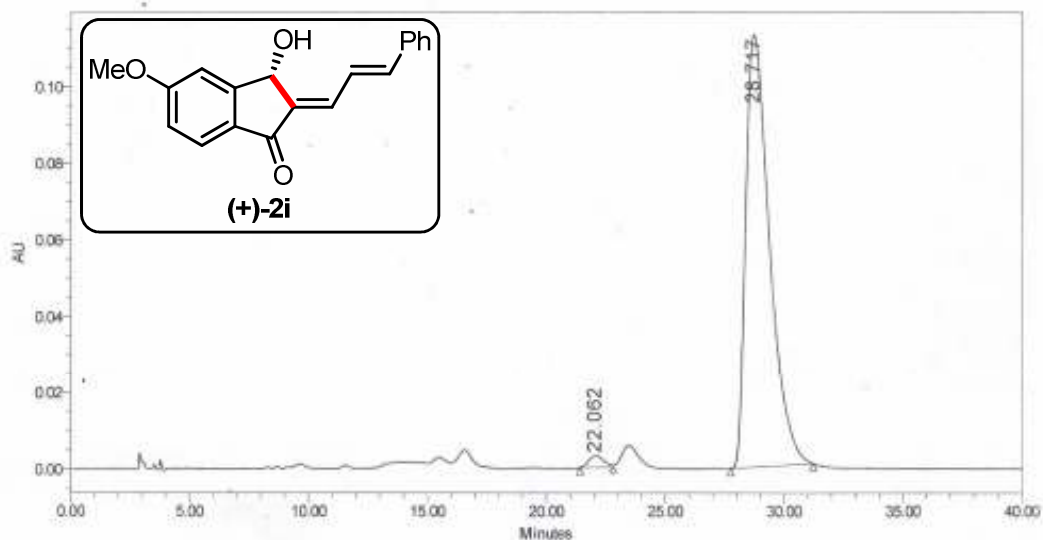

|   | RT     | Area    | % Area | Height |
|---|--------|---------|--------|--------|
| 1 | 22.062 | 138454  | 1.73   | 3077   |
| 2 | 28.717 | 7854129 | 98.27  | 113139 |

Reported by User: System  
 Report Method: Vishnu  
 Report Method II: 7931  
 Page: 1 of 2

Project Name: YR\_01  
 Date Printed: 25-04-2017  
 22:36:57 Asia/Calcutta



## SAMPLE INFORMATION

|                   |                             |                     |                          |
|-------------------|-----------------------------|---------------------|--------------------------|
| Sample Name:      | BS06-omebenzdi phracAD6%1ml | Acquired By:        | System                   |
| Sample Type:      | Unknown                     | Sample Set Name:    |                          |
| Vial:             | 1                           | Acq. Method Set:    | Bishnu MBH               |
| Injection #:      | 1                           | Processing Method:  | bsomebenzdi phracAD6%1ml |
| Injection Volume: | 10.00 ul                    | Channel Name:       | 254.0nm                  |
| Run Time:         | 100.0 Minutes               | Proc. Chnl. Descr.: | PDA 254.0 nm             |
| Date Acquired:    | 04-09-2016 00:29:43 IST     |                     |                          |
| Date Processed:   | 04-09-2016 02:34:04 IST     |                     |                          |

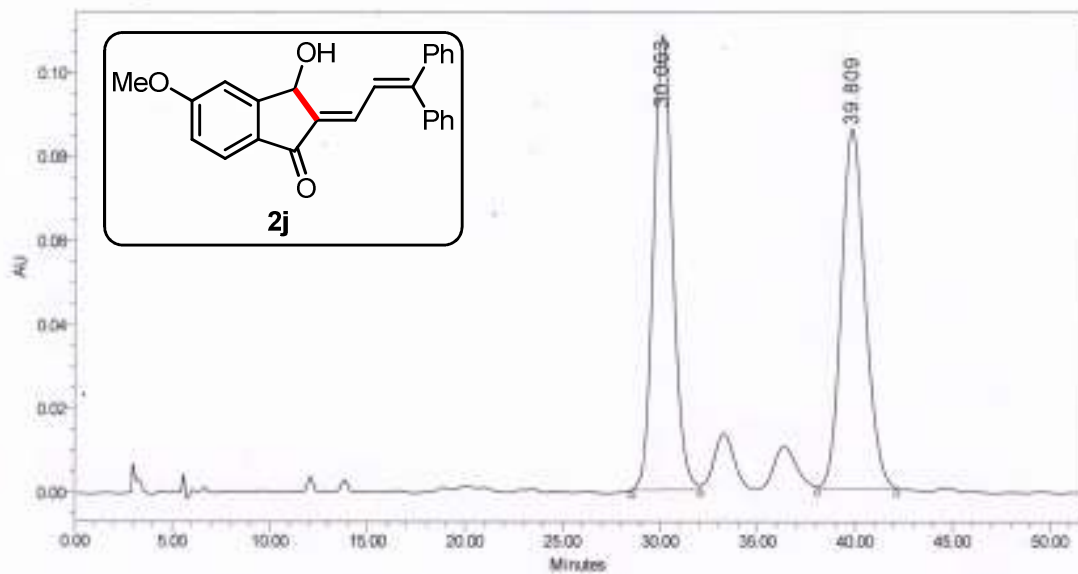

|   | RT     | Area    | % Area | Height |
|---|--------|---------|--------|--------|
| 1 | 30.063 | 7410004 | 50.27  | 108359 |
| 2 | 39.809 | 7330164 | 49.73  | 85657  |

Reported by User: System  
 Report Method: Vishnu  
 Report Method ID: 6354  
 Page: 1 of 2

Project Name: YR\_01  
 Date Printed:  
 04-09-2016  
 02:34:53 Asia/Calcutta



## SAMPLE INFORMATION

|                   |                         |                     |                      |
|-------------------|-------------------------|---------------------|----------------------|
| Sample Name:      | Unknown                 | Acquired By:        | System               |
| Sample Type:      | 1                       | Sample Set Name:    |                      |
| Vial:             | 1                       | Acq. Method Set:    | Bishnu MBH           |
| Injection #:      | 2                       | Processing Method:  | bs06omebenzdiphcat15 |
| Injection Volume: | 10.00 ul                | Channel Name:       | 254.0nm              |
| Run Time:         | 100.0 Minutes           | Proc. Chnl. Descr.: | PDA 254.0 nm         |
| Date Acquired:    | 04-09-2016 01:24:27 IST |                     |                      |
| Date Processed:   | 04-09-2016 02:32:56 IST |                     |                      |

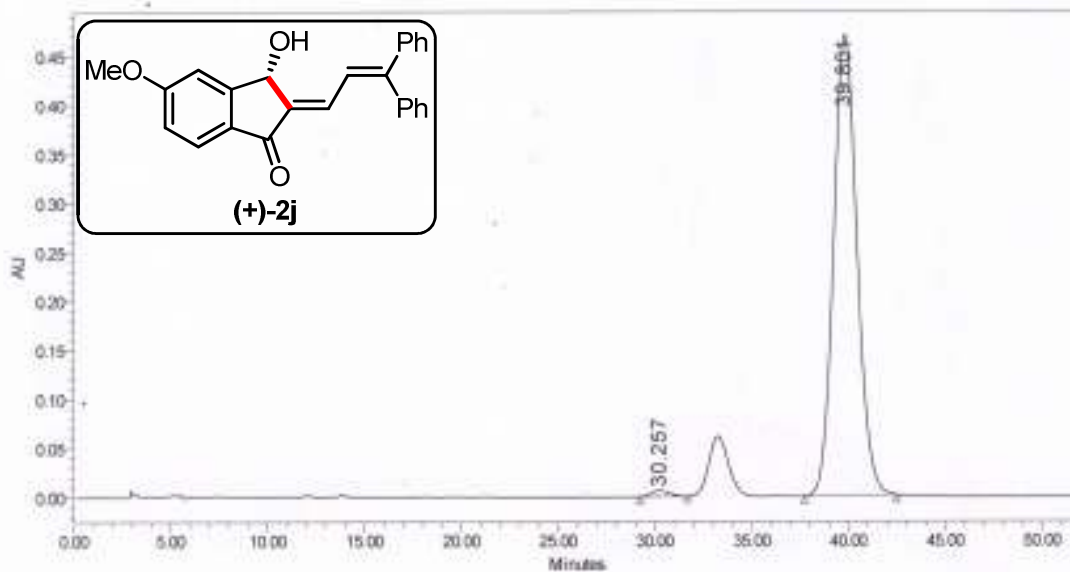

|   | RT     | Area     | % Area | Height |
|---|--------|----------|--------|--------|
| 1 | 30.257 | 390447   | 0.98   | 6058   |
| 2 | 39.801 | 38487865 | 99.02  | 470009 |

Reported by User: System  
 Report Method: Vishnu  
 Report Method ID: 6404  
 Page: 1 of 2

Project Name: YR\_01  
 Date Printed:  
 04-09-2016  
 02:36:00 Asia/Calcutta

## SAMPLE INFORMATION

|                   |                         |                     |                        |
|-------------------|-------------------------|---------------------|------------------------|
| Sample Name:      | BS-diomehexracAD12%.7ml | Acquired By:        | System                 |
| Sample Type:      | Unknown                 | Sample Set Name     |                        |
| Vial:             | 1                       | Acq. Method Set:    | Bishnu MBH             |
| Injection #:      | 1                       | Processing Method:  | bs diomehexracAD12%7ml |
| Injection Volume: | 10.00 ul                | Channel Name:       | 254.0nm                |
| Run Time:         | 120.0 Minutes           | Proc. Chnl. Descr.: | PDA 254.0 nm           |
| Date Acquired:    | 22-04-2017 23:09:24 IST |                     |                        |
| Date Processed:   | 25-04-2017 21:47:56 IST |                     |                        |

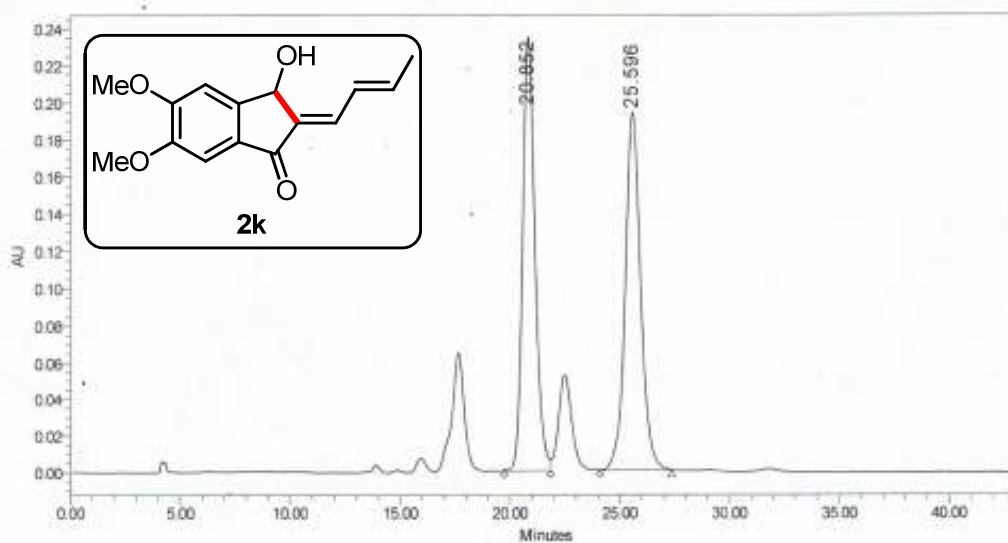

|   | RT     | Area    | % Area | Height |
|---|--------|---------|--------|--------|
| 1 | 20.852 | 9086127 | 49.03  | 234790 |
| 2 | 25.596 | 9445436 | 50.97  | 193654 |

Reported by User: System  
 Report Method: Vishnu  
 Report Method ID: 7932  
 Page: 1 of 2

Project Name: YR\_01  
 Date Printed:  
 25-04-2017  
 22:38:37 Asia/Calcutta

## SAMPLE INFORMATION

|                   |                           |                     |                 |
|-------------------|---------------------------|---------------------|-----------------|
| Sample Name:      | BS-diomehexcat15AD12%.7ml | Acquired By:        | System          |
| Sample Type:      | Unknown                   | Sample Set Name:    |                 |
| Vial:             | 1                         | Acq. Method Set:    | Bishnu MBH      |
| Injection #:      | 2                         | Processing Method:  | bsdiomehexcat15 |
| Injection Volume: | 10.00 ul                  | Channel Name:       | 254.0nm         |
| Run Time:         | 120.0 Minutes             | Proc. Chnl. Descr.: | PDA 254.0 nm    |
| Date Acquired:    | 23-04-2017 00:02:56 IST   |                     |                 |
| Date Processed:   | 25-04-2017 21:48:49 IST   |                     |                 |

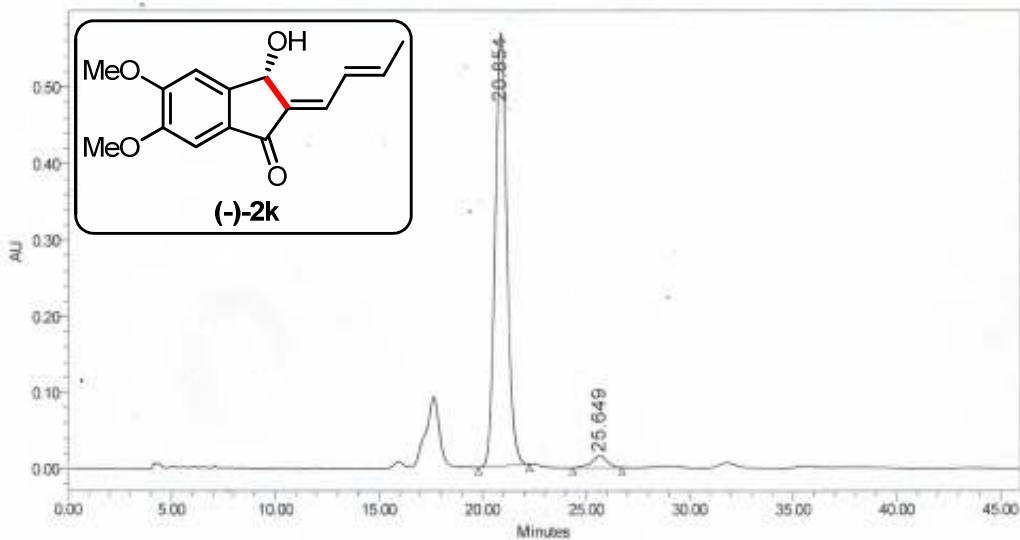

| RT       | Area     | % Area | Height |
|----------|----------|--------|--------|
| 1 20.854 | 22431058 | 96.54  | 566589 |
| 2 25.649 | 804320   | 3.46   | 15332  |

Reported by User: System  
 Report Method: Vishnu  
 Report Method ID: 7934  
 Page: 1 of 2

Project Name: YR\_01  
 Date Printed: 25-04-2017  
 23:17:34 Asia/Calcutta

## SAMPLE INFORMATION

|                   |                         |                     |                    |
|-------------------|-------------------------|---------------------|--------------------|
| Sample Name:      | BS-naphhexracODH10%     | Acquired By:        | System             |
| Sample Type:      | Unknown                 | Sample Set Name:    |                    |
| Vial:             | 1                       | Acq. Method Set:    | Bishnu MBH         |
| Injection #:      | 1                       | Processing Method:  | bsnaphhexracODH10% |
| Injection Volume: | 10.00 ul                | Channel Name:       | 254.0nm            |
| Run Time:         | 120.0 Minutes           | Proc. Chnl. Descr.: | PDA 254.0 nm       |
| Date Acquired:    | 22-04-2017 10:36:36 IST |                     |                    |
| Date Processed:   | 25-04-2017 21:45:47 IST |                     |                    |

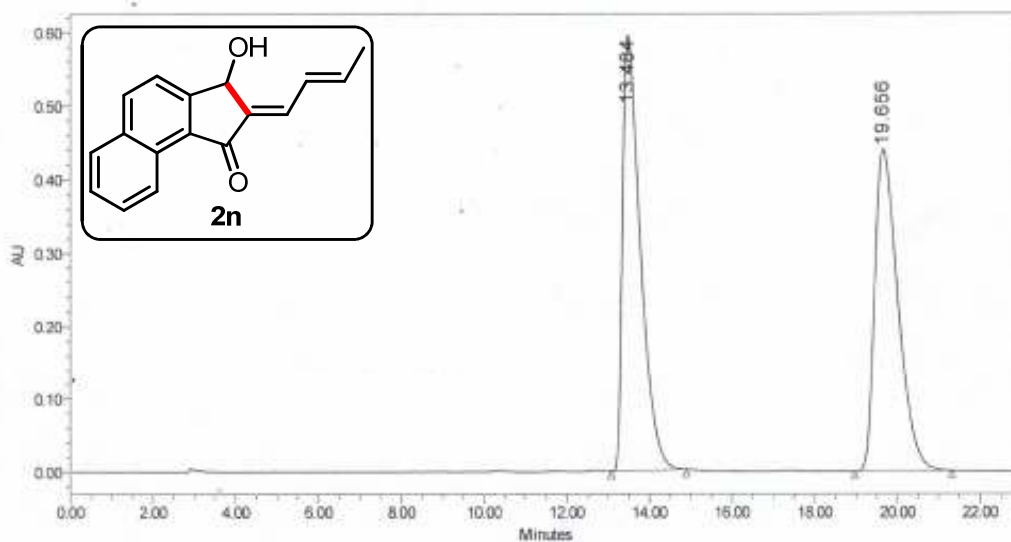

|   | RT     | Area     | % Area | Height |
|---|--------|----------|--------|--------|
| 1 | 13.484 | 17756116 | 50.73  | 594348 |
| 2 | 19.656 | 17243709 | 49.27  | 439915 |

Reported by User: System  
 Report Method: Vishnu  
 Report Method ID: 7932  
 Page: 1 of 2

Project Name: YR\_01  
 Date Printed: 25-04-2017  
 22:38:01 Asia/Calcutta

## SAMPLE INFORMATION

|                   |                          |                     |                |
|-------------------|--------------------------|---------------------|----------------|
| Sample Name:      | BS-naphhexraccat15ODH10% | Acquired By:        | System         |
| Sample Type:      | Unknown                  | Sample Set Name:    |                |
| Vial:             | 1                        | Acq. Method Set:    | Bishnu MBH     |
| Injection #:      | 2                        | Processing Method:  | bsnaphhexcat15 |
| Injection Volume: | 10.00 ul                 | Channel Name:       | 254.0nm        |
| Run Time:         | 120.0 Minutes            | Proc. Chnl. Descr.: | PDA 254.0 nm   |
| Date Acquired:    | 22-04-2017 11:21:08 IST  |                     |                |
| Date Processed:   | 25-04-2017 21:47:03 IST  |                     |                |

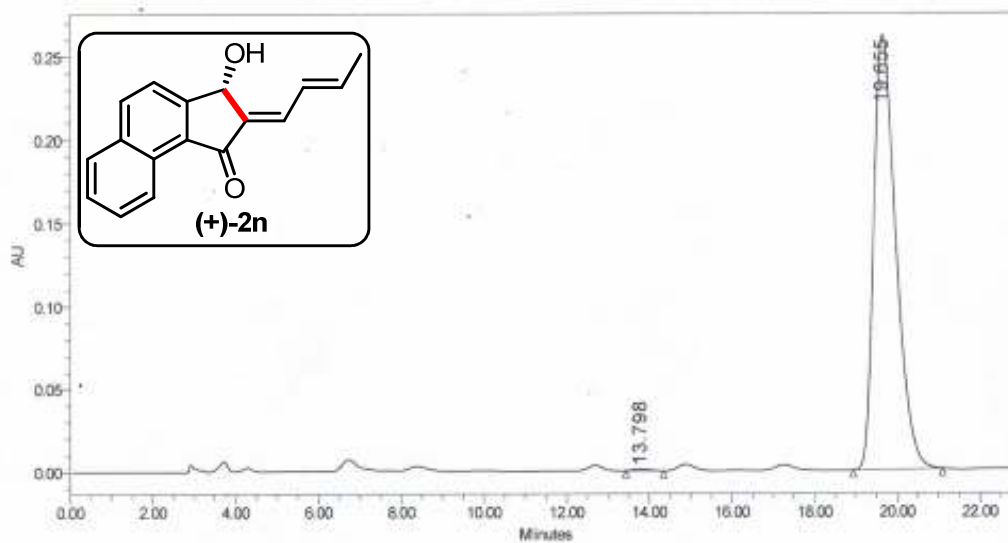

|   | RT     | Area    | % Area | Height |
|---|--------|---------|--------|--------|
| 1 | 13.798 | 29375   | 0.30   | 1100   |
| 2 | 19.655 | 9719027 | 99.70  | 261473 |

Reported by User: System  
Report Method: Vishnu  
Report Method ID: 7931  
Page: 1 of 2

Project Name: YR\_01  
Date Printed: 25-04-2017  
22:37:48 Asia/Calcutta

## SAMPLE INFORMATION

|                   |                         |                     |                    |
|-------------------|-------------------------|---------------------|--------------------|
| Sample Name:      | BS-06naphdiphrac5%      | Acquired By:        | System             |
| Sample Type:      | Unknown                 | Sample Set Name:    |                    |
| Vial:             | 1                       | Acq. Method Set:    | Bishnu MBH         |
| Injection #:      | 2                       | Processing Method:  | bsnaphdiphracODH5% |
| Injection Volume: | 10.00 ul                | Channel Name:       | 254.0nm            |
| Run Time:         | 120.0 Minutes           | Proc. Chnl. Descr.: | PDA 254.0 nm       |
| Date Acquired:    | 25-04-2017 20:33:45 IST |                     |                    |
| Date Processed:   | 25-04-2017 22:01:31 IST |                     |                    |

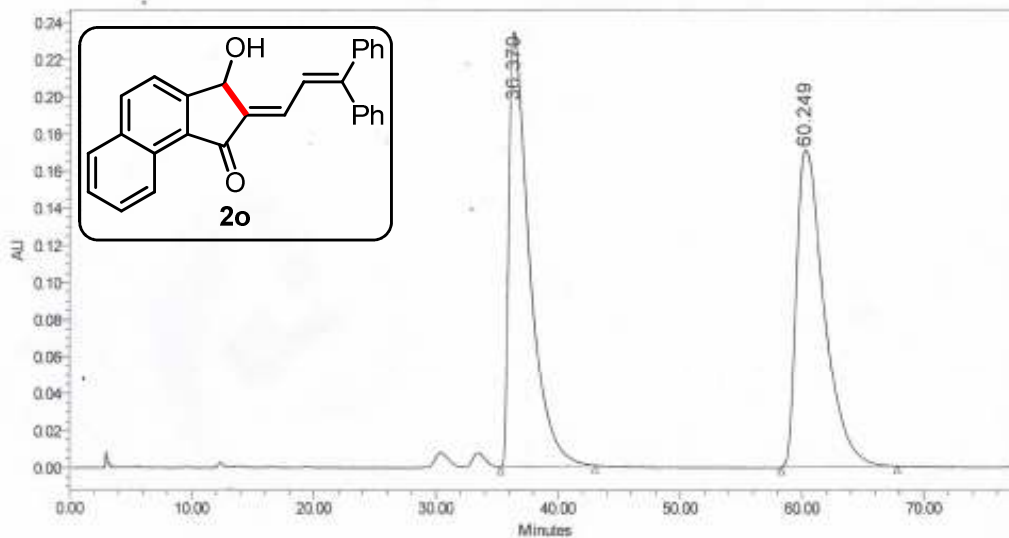

|   | RT     | Area     | % Area | Height |
|---|--------|----------|--------|--------|
| 1 | 36.370 | 27443564 | 50.36  | 234410 |
| 2 | 60.249 | 27049868 | 49.64  | 170737 |

Reported by User: System  
 Report Method: Vishnu  
 Report Method ID: 7934  
 Page: 1 of 2

Project Name: YR\_01  
 Date Printed: 25-04-2017  
 22:44:50 Asia/Calcutta

## SAMPLE INFORMATION

|                   |                         |                     |                 |
|-------------------|-------------------------|---------------------|-----------------|
| Sample Name:      | BS-06naphdiphcat15 5%   | Acquired By:        | System          |
| Sample Type:      | Unknown                 | Sample Set Name:    |                 |
| Vial:             | 1                       | Acq. Method Set:    | Bishnu MBH      |
| Injection #:      | 3                       | Processing Method:  | bsnaphdiphcat15 |
| Injection Volume: | 10.00 ul                | Channel Name:       | 254.0nm         |
| Run Time:         | 120.0 Minutes           | Proc. Chnl. Descr.: | PDA 254.0 nm    |
| Date Acquired:    | 25-04-2017 21:54:04 IST |                     |                 |
| Date Processed:   | 25-04-2017 23:03:44 IST |                     |                 |

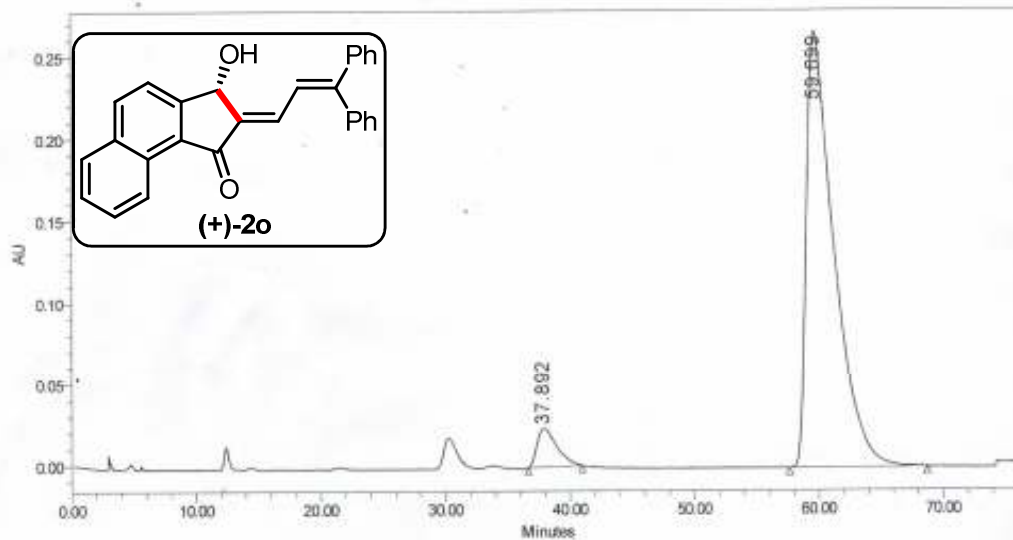

|   | RT     | Area     | % Area | Height |
|---|--------|----------|--------|--------|
| 1 | 37.892 | 2613063  | 5.95   | 23744  |
| 2 | 59.699 | 41273723 | 94.05  | 266201 |

Reported by User: System  
Report Method: Vishnu  
Report Method ID: 7934  
Page: 1 of 2

Project Name: YR\_01  
Date Printed:  
25-04-2017  
23:14:59 Asia/Calcutta



## SAMPLE INFORMATION

|                   |                         |                     |                        |
|-------------------|-------------------------|---------------------|------------------------|
| Sample Name:      | BS06-pyrhexracADH13%1ml | Acquired By:        | System                 |
| Sample Type:      | Unknown                 | Sample Set Name:    |                        |
| Vial:             | 1                       | Acq. Method Set:    | Bishnu MBH             |
| Injection #:      | 1                       | Processing Method:  | bs06pyrhexracADH13%1ml |
| Injection Volume: | 10.00 ul                | Channel Name:       | 254.0nm                |
| Run Time:         | 120.0 Minutes           | Proc. Chnl. Descr.: | PDA 254.0 nm           |
| Date Acquired:    | 23-09-2016 22:41:06 IST |                     |                        |
| Date Processed:   | 23-09-2016 23:18:17 IST |                     |                        |

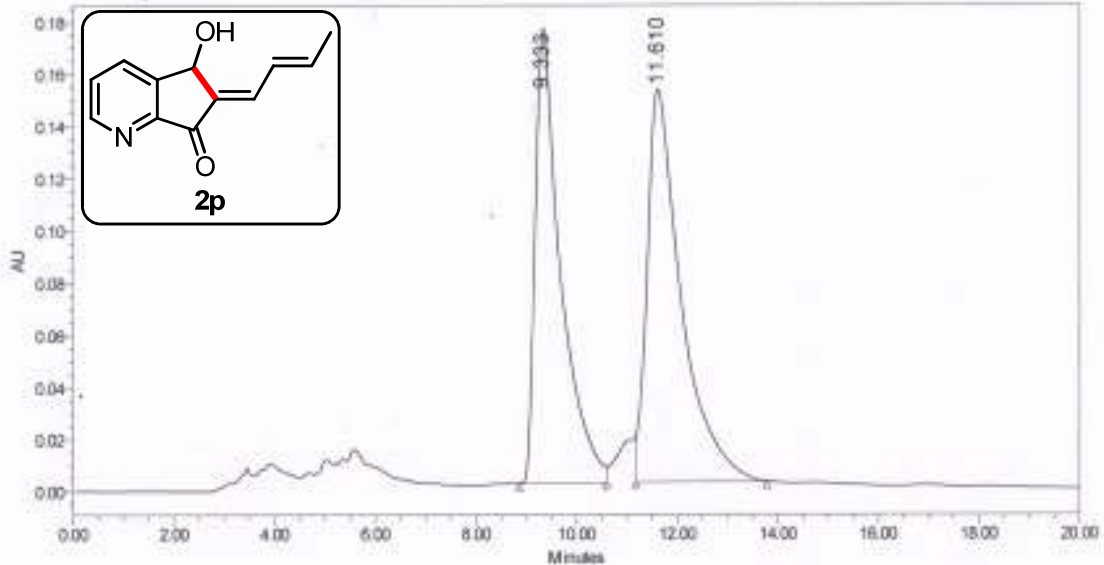

|   | RT     | Area    | % Area | Height |
|---|--------|---------|--------|--------|
| 1 | 9.333  | 6120025 | 46.45  | 174467 |
| 2 | 11.610 | 7056757 | 53.55  | 150816 |

Reported by User: System  
 Report Method: Vishnu  
 Report Method ID: 6487  
 Page: 1 of 2

Project Name: YR\_01  
 Date Printed:  
 23-09-2016  
 23:52:06 Asia/Calcutta



## SAMPLE INFORMATION

|                   |                         |                     |                 |
|-------------------|-------------------------|---------------------|-----------------|
| Sample Name:      | BS06-pyrhexracADH13%1ml | Acquired By:        | System          |
| Sample Type:      | Unknown                 | Sample Set Name     |                 |
| Vial:             | 1                       | Acq. Method Set:    | Bishnu MBH      |
| Injection #:      | 2                       | Processing Method:  | bs06pyrhexcat15 |
| Injection Volume: | 10.00 ul                | Channel Name:       | 254.0nm         |
| Run Time:         | 120.0 Minutes           | Proc. Chnl. Descr.: | PDA 254.0 nm    |
| Date Acquired:    | 23-09-2016 23:23:33 IST |                     |                 |
| Date Processed:   | 23-09-2016 23:53:36 IST |                     |                 |

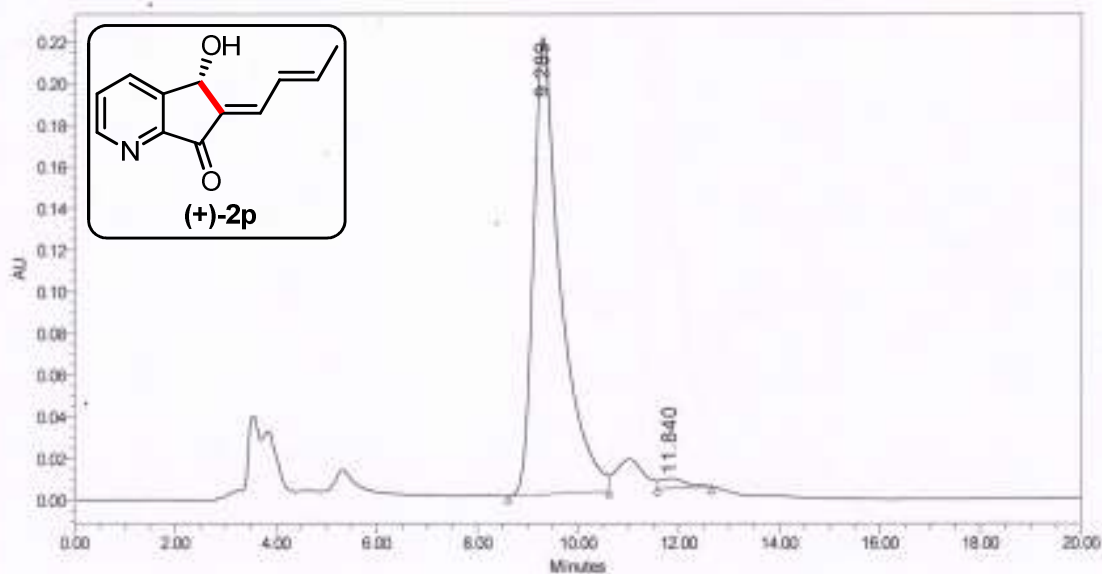

|   | RT     | Area    | % Area | Height |
|---|--------|---------|--------|--------|
| 1 | 9.289  | 8225125 | 98.04  | 219272 |
| 2 | 11.840 | 164209  | 1.96   | 4720   |

Reported by User: System  
 Report Method: Vishnu  
 Report Method ID: 6497  
 Page: 1 of 2

Project Name: YR\_01  
 Date Printed:  
 23-09-2016  
 23:54:26 Asia/Calcutta

## SAMPLE INFORMATION

|                   |                          |                     |                        |
|-------------------|--------------------------|---------------------|------------------------|
| Sample Name:      | bs-06-benzthiohexracAS2% | Acquired By:        | System                 |
| Sample Type:      | Unknown                  | Sample Set Name:    |                        |
| Vial:             | 1                        | Acq. Method Set:    | Bishnu MBH             |
| Injection #:      | 1                        | Processing Method:  | bs06benzthiohexracAS2% |
| Injection Volume: | 10.00 ul                 | Channel Name:       | 254.0nm                |
| Run Time:         | 120.0 Minutes            | Proc. Chnl. Descr.: | PDA.254.0 nm           |
| Date Acquired:    | 18-02-2016 10:04:49 IST  |                     |                        |
| Date Processed:   | 18-02-2016 11:24:32 IST  |                     |                        |

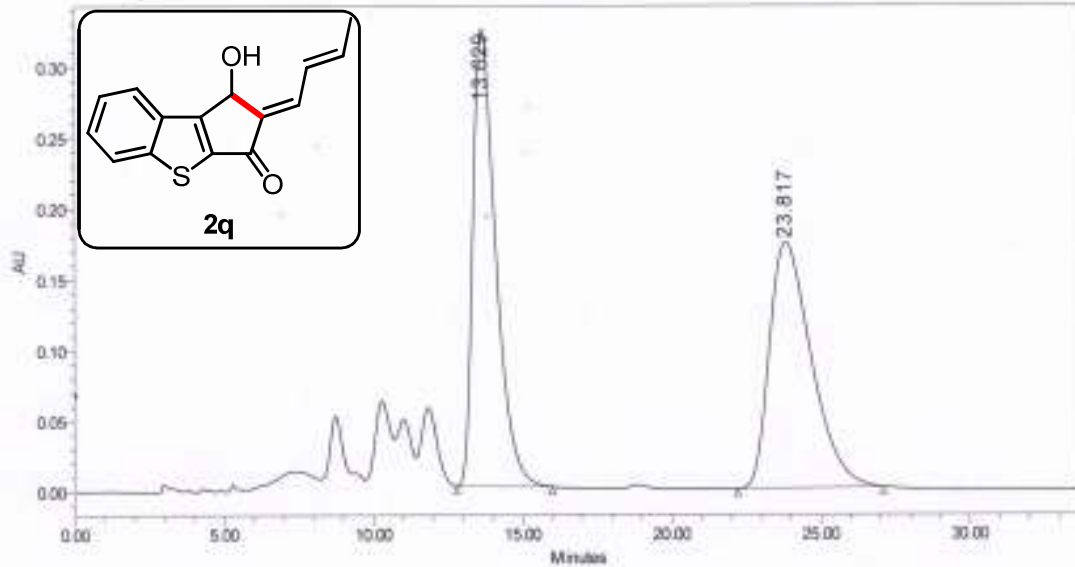

|   | RT     | Area     | % Area | Height |
|---|--------|----------|--------|--------|
| 1 | 13.629 | 17129243 | 50.28  | 322727 |
| 2 | 23.817 | 16940650 | 49.72  | 173745 |

Reported by User: System  
 Report Method: Vishnu  
 Report Method ID: 5530  
 Page: 1 of 2

Project Name: YR\_01  
 Date Printed:  
 18-02-2016  
 11:24:59 Asai/Calcutte

## SAMPLE INFORMATION

|                   |                            |                     |                          |
|-------------------|----------------------------|---------------------|--------------------------|
| Sample Name:      | bs-06-benzthiohexcat15AS2% | Acquired By:        | System                   |
| Sample Type:      | Unknown                    | Sample Set Name:    |                          |
| Vial:             | 1                          | Acq. Method Set:    | Bishnu MBH               |
| Injection #:      | 2                          | Processing Method:  | bs06benzthiohexcat15AS2% |
| Injection Volume: | 10.00 ul                   | Channel Name:       | 254.0nm                  |
| Run Time:         | 120.0 Minutes              | Proc. Chnl. Descr.: | PDA 254.0 nm             |
| Date Acquired:    | 18-02-2016 10:41:22 IST    |                     |                          |
| Date Processed:   | 18-02-2016 11:26:44 IST    |                     |                          |

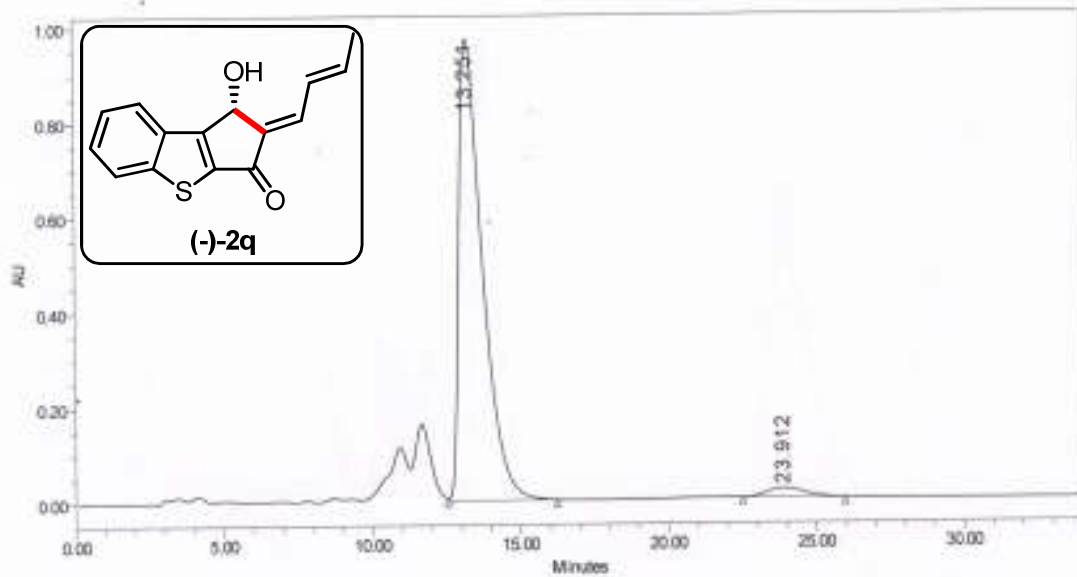

|   | RT     | Area     | % Area | Height |
|---|--------|----------|--------|--------|
| 1 | 13.251 | 53252016 | 96.92  | 969867 |
| 2 | 23.912 | 1693262  | 3.08   | 19010  |

Reported by User: System  
 Report Method: Vishnu  
 Report Method ID: 5533  
 Page: 1 of 2

Project Name: YR\_01  
 Date Printed:  
 18-02-2016  
 11:27:01 Asia/Calcutta

## SAMPLE INFORMATION

|                   |                         |                     |                   |
|-------------------|-------------------------|---------------------|-------------------|
| Sample Name:      | BS-06chromhexracODH 5%  | Acquired By:        | System            |
| Sample Type:      | Unknown                 | Sample Set Name:    |                   |
| Vial:             | 1                       | Acq. Method Set:    | Bishnu MBH        |
| Injection #:      | 4                       | Processing Method:  | bchromhexracODH5% |
| Injection Volume: | 10.00 ul                | Channel Name:       | 254.0nm           |
| Run Time:         | 120.0 Minutes           | Proc. Chnl. Descr.: | PDA 254.0 nm      |
| Date Acquired:    | 25-04-2017 23:14:16 IST |                     |                   |
| Date Processed:   | 26-04-2017 00:46:21 IST |                     |                   |

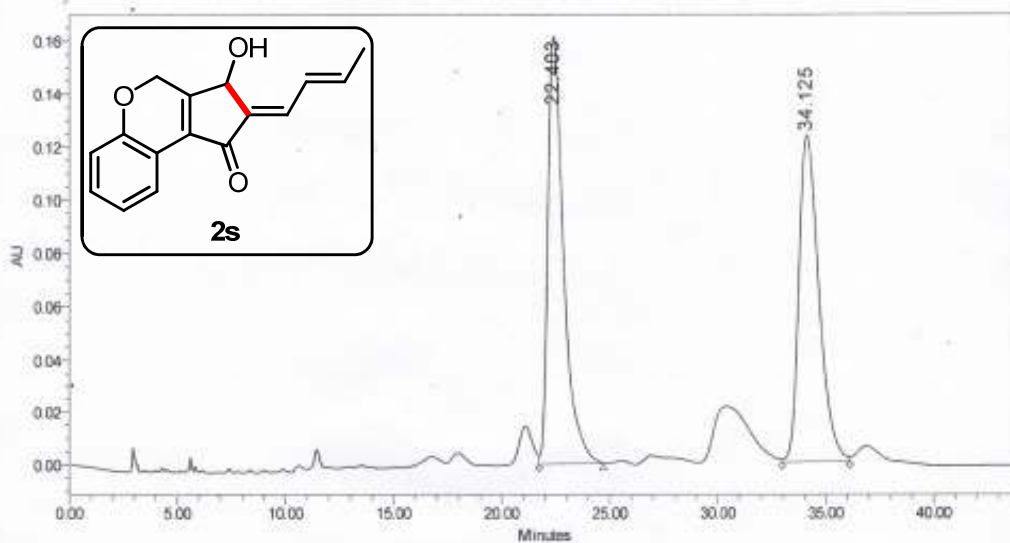

|   | RT     | Area    | % Area | Height |
|---|--------|---------|--------|--------|
| 1 | 22.403 | 8143691 | 50.40  | 161244 |
| 2 | 34.125 | 8015049 | 49.60  | 123231 |

Reported by User: System  
 Report Method: Vishnu  
 Report Method ID: 7934  
 Page: 1 of 2

Project Name: YR\_01  
 Date Printed: 26-04-2017  
 00:49:19 Asia/Calcutta

## SAMPLE INFORMATION

|                   |                          |                     |                  |
|-------------------|--------------------------|---------------------|------------------|
| Sample Name:      | bs-chromhexchiODH75%.8ml | Acquired By:        | System           |
| Sample Type:      | Unknown                  | Sample Set Name:    |                  |
| Vial:             | 1                        | Acq. Method Set:    | Atanu            |
| Injection #:      | 2                        | Processing Method:  | bschromhexchiral |
| Injection Volume: | 10.00 ul                 | Channel Name:       | 254.0nm          |
| Run Time:         | 120.0 Minutes            | Proc. Chnl. Descr.: | PDA 254.0 nm     |
| Date Acquired:    | 03-01-2017 11:44:32 IST  |                     |                  |
| Date Processed:   | 03-01-2017 12:42:06 IST  |                     |                  |

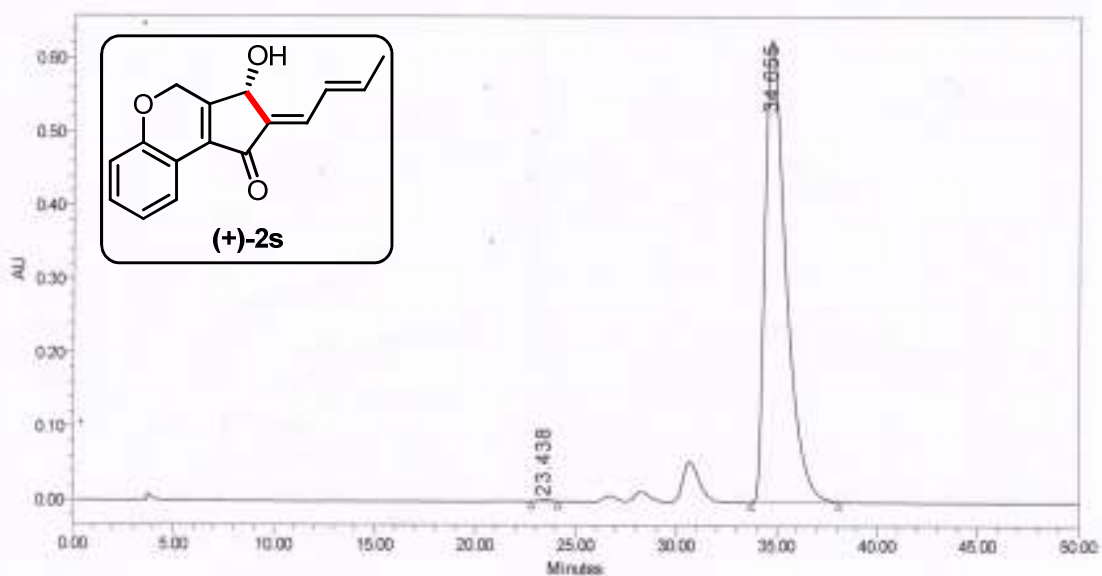

|   | RT     | Area     | % Area | Height |
|---|--------|----------|--------|--------|
| 1 | 23.438 | 92314    | 0.20   | 2194   |
| 2 | 34.655 | 45202379 | 99.80  | 626864 |

Reported by User: System  
 Report Method: Vishnu  
 Report Method ID: 6925  
 Page: 1 of 2

Project Name: YR\_01  
 Date Printed: 03-01-2017  
 12:46:55 Asia/Calcutta

## SAMPLE INFORMATION

|                   |                            |                     |                          |
|-------------------|----------------------------|---------------------|--------------------------|
| Sample Name:      | BS05-chromdiphracODH10%1ml | Acquired By:        | System                   |
| Sample Type:      | Unknown                    | Sample Set Name     |                          |
| Vial:             | 1                          | Acq. Method Set:    | Bishnu MBH               |
| Injection #:      | 1                          | Processing Method:  | bs06chromdiphracODH7%8ml |
| Injection Volume: | 10.00 ul                   | Channel Name:       | 254.0nm                  |
| Run Time:         | 120.0 Minutes              | Proc. Chnl. Descr.: | PDA 254.0 nm             |
| Date Acquired:    | 19-09-2016 20:58:35 IST    |                     |                          |
| Date Processed:   | 19-09-2016 22:38:49 IST    |                     |                          |

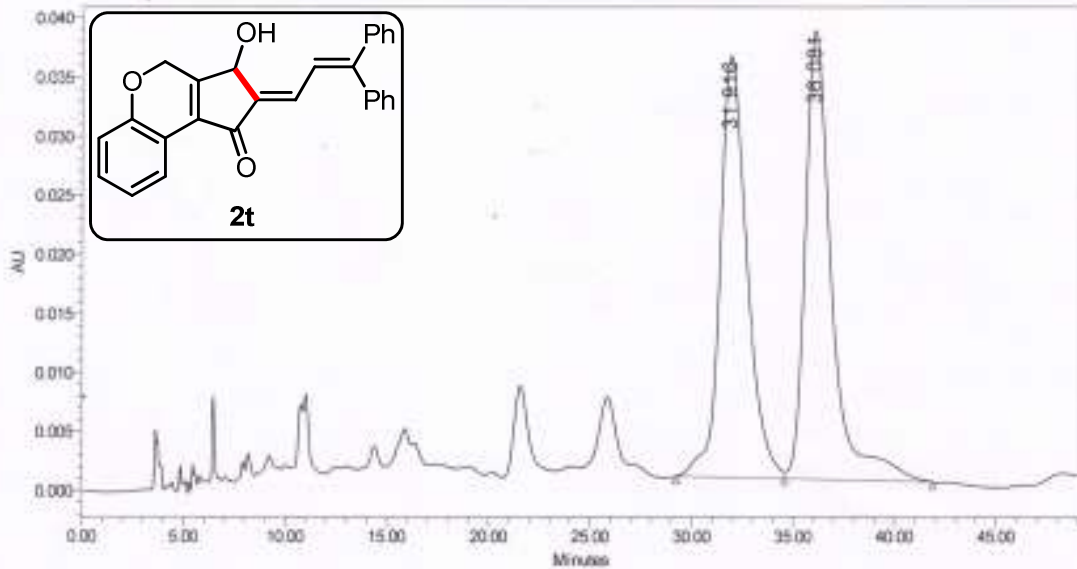

|   | RT     | Area    | % Area | Height |
|---|--------|---------|--------|--------|
| 1 | 31.916 | 3292861 | 49.07  | 35634  |
| 2 | 36.081 | 3417566 | 50.93  | 37960  |

Reported by User: System  
 Report Method: Vishnu  
 Report Method ID: 6497  
 Page: 1 of 2

Project Name: YR\_01  
 Date Printed:  
 19-09-2016  
 22:44:30 Asa/Calcutta



## SAMPLE INFORMATION

|                   |                         |                     |                    |
|-------------------|-------------------------|---------------------|--------------------|
| Sample Name:      | Unknown                 | Acquired By:        | System             |
| Sample Type:      | 1                       | Sample Set Name:    |                    |
| Vial:             | 1                       | Acq. Method Set:    | Bishnu MBH         |
| Injection #:      | 2                       | Processing Method:  | bs06chromdiphcat15 |
| Injection Volume: | 10.00 ul                | Channel Name:       | 254.0nm            |
| Run Time:         | 120.0 Minutes           | Proc. Chnl. Descr.: | PDA 254.0 nm       |
| Date Acquired:    | 19-09-2016 21:50:19 IST |                     |                    |
| Date Processed:   | 19-09-2016 22:42:18 IST |                     |                    |

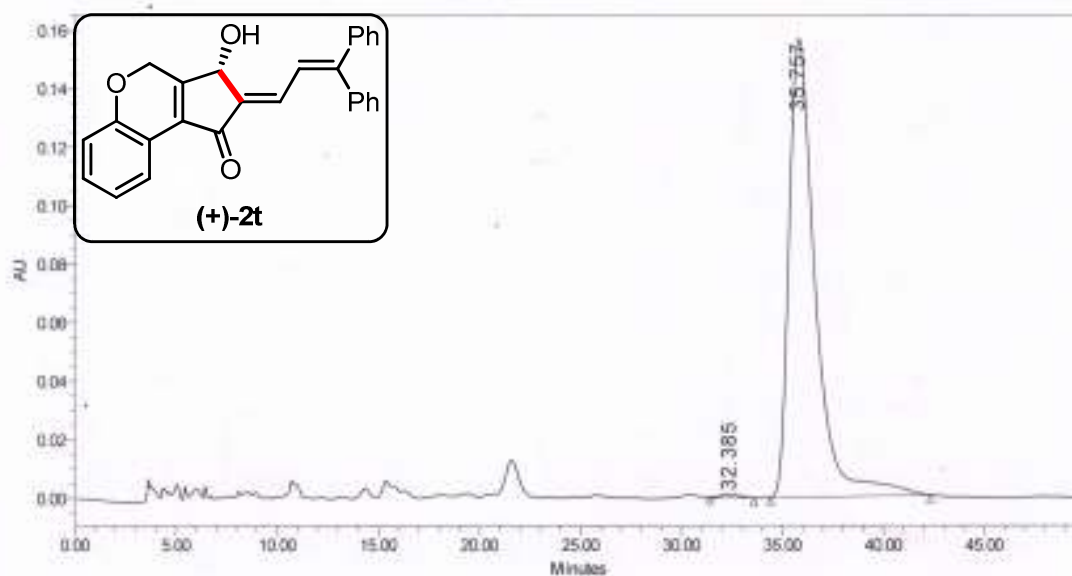

|   | RT     | Area     | % Area | Height |
|---|--------|----------|--------|--------|
| 1 | 32.385 | 85107    | 0.60   | 1168   |
| 2 | 35.757 | 14130097 | 99.40  | 156856 |

Reported by User: System  
Report Method: Vishnu  
Report Method ID: 6497  
Page: 1 of 2

Project Name: YR\_01  
Date Printed:  
19-09-2016  
22:44:57 Asa/Calcutta

## SAMPLE INFORMATION

|                   |                |                    |              |
|-------------------|----------------|--------------------|--------------|
| Sample Name:      | bs05113racemic | Acquired By:       | System       |
| Sample Type:      | Unknown        | Sample Set Name:   |              |
| Vial:             | 1              | Acq. Method Set:   | Bishnu MBH   |
| Injection #:      | 1              | Processing Method: | bs05113rac   |
| Injection Volume: | 10.00 ul       | Channel Name:      | 254.0nm      |
| Run Time:         | 80.0 Minutes   | Proc. Chnl. Descr: | PDA 254.0 nm |

Date Acquired: 06-06-2015 16:00:03 IST  
Date Processed: 28-11-2016 22:21:27 IST

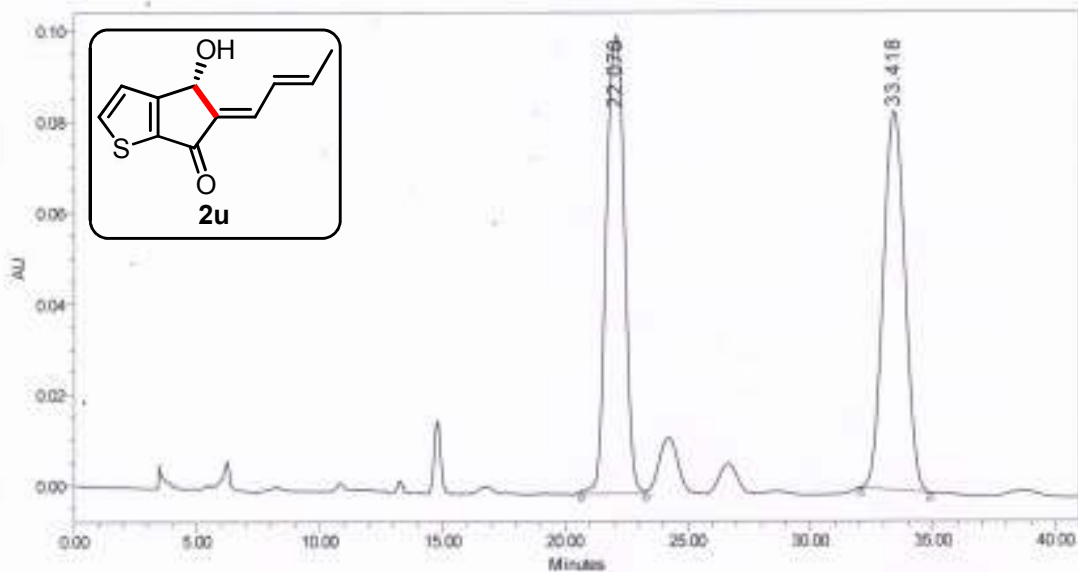

|   | RT     | Area    | % Area | Height |
|---|--------|---------|--------|--------|
| 1 | 22.076 | 5198848 | 50.31  | 100860 |
| 2 | 33.418 | 5134171 | 49.69  | 83335  |

Reported by User: System  
Report Method: Vishnu  
Report Method ID: 6497  
Page: 1 of 2

Project Name: YR\_01  
Date Printed:  
28-11-2016  
22:22:15 Asia/Calcutta



## SAMPLE INFORMATION

|                   |                         |                     |              |
|-------------------|-------------------------|---------------------|--------------|
| Sample Name:      | bs05113cat15            | Acquired By:        | System       |
| Sample Type:      | Unknown                 | Sample Set Name:    |              |
| Vial:             | 1                       | Acq. Method Set:    | Bishnu MBH   |
| Injection #:      | 1                       | Processing Method:  | bs05113cat15 |
| Injection Volume: | 10.00 ul                | Channel Name:       | 254.0nm      |
| Run Time:         | 80.0 Minutes            | Proc. Chnl. Descr.: | PDA 254.0 nm |
| Date Acquired:    | 06-06-2015 17:59:14 IST |                     |              |
| Date Processed:   | 06-06-2015 18:44:03 IST |                     |              |

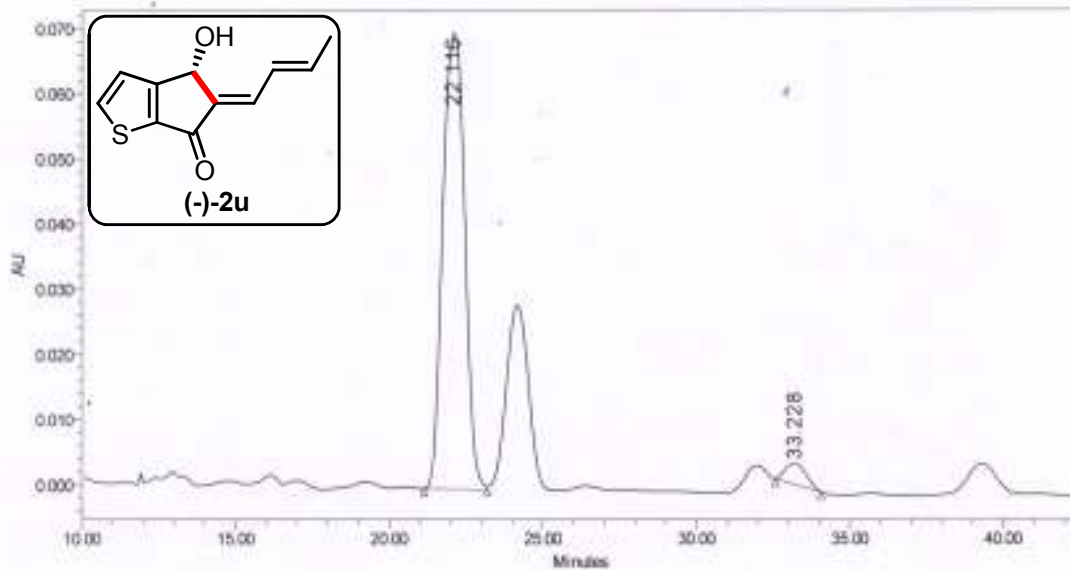

|   | RT     | Area    | % Area | Height |
|---|--------|---------|--------|--------|
| 1 | 22.116 | 3452139 | 95.94  | 69888  |
| 2 | 33.228 | 145959  | 4.06   | 3137   |

Reported by User: System  
 Report Method: Vishnu  
 Report Method ID: 3837  
 Page: 1 of 1

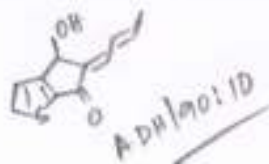

Project Name: YR\_01  
 Date Printed: 06-06-2015  
 18:47:37 Asia/Calcutta
